# Supplementary material for: Application of Transcriptomics to Compare the Carbohydrate Active Enzymes That Are Expressed by Diverse Genera of Anaerobic Fungi to Degrade Plant Cell Wall Carbohydrates
Source: Front Microbiol. 2018 Jul 16;9:1581. doi: 10.3389/fmicb.2018.01581 (PMC6054980; doi:10.3389/fmicb.2018.01581)
Supplement: Supplementary file 5 [file Data_Sheet_5.XLSX]

## Sheet: Anamu
PFAM_ID	Protein_count	Pfam description				8302
PF12796	308	Ankyrin repeats (3 copies)
PF02013	267	Cellulose or protein binding domain
PF00069	147	Protein kinase domain
PF08757	138	CotH kinase protein
PF13637	102	Ankyrin repeats (many copies)
PF00076	88	RNA recognition motif. (a.k.a. RRM, RBD, or RNP domain)
PF00187	83	Chitin recognition protein
PF00005	73	ABC transporter
PF13855	68	Leucine rich repeat
PF00400	66	WD domain, G-beta repeat
PF00734	66	Fungal cellulose binding domain
PF00271	62	Helicase conserved C-terminal domain
PF00270	46	DEAD/DEAH box helicase
PF00149	41	Calcineurin-like phosphoesterase
PF00004	40	ATPase family associated with various cellular activities (AAA)
PF00082	38	Subtilase family
PF00664	35	ABC transporter transmembrane region
PF00071	33	Ras family
PF01522	33	Polysaccharide deacetylase
PF13606	33	Ankyrin repeat
PF12698	33	ABC-2 family transporter protein
PF00168	32	C2 domain
PF00018	30	SH3 domain
PF14604	28	Variant SH3 domain
PF00226	28	DnaJ domain
PF02901	26	Pyruvate formate lyase-like
PF00169	24	PH domain
PF00457	24	Glycosyl hydrolases family 11
PF04616	23	Glycosyl hydrolases family 43
PF00179	22	Ubiquitin-conjugating enzyme
PF07690	21	Major Facilitator Superfamily
PF00240	20	Ubiquitin family
PF00621	20	RhoGEF domain
PF05649	20	Peptidase family M13
PF00501	20	AMP-binding enzyme
PF00085	19	Thioredoxin
PF00856	19	SET domain
PF13639	19	Ring finger domain
PF00150	19	Cellulase (glycosyl hydrolase family 5)
PF13857	19	Ankyrin repeats (many copies)
PF00155	19	Aminotransferase class I and II
PF00248	19	Aldo/keto reductase family
PF00561	18	alpha/beta hydrolase fold
PF00443	17	Ubiquitin carboxyl-terminal hydrolase
PF00079	17	Serpin (serine protease inhibitor)
PF14200	17	Ricin-type beta-trefoil lectin domain-like
PF00078	17	Reverse transcriptase (RNA-dependent DNA polymerase)
PF00756	17	Putative esterase
PF00012	17	Hsp70 protein
PF00232	17	Glycosyl hydrolase family 1
PF13472	17	GDSL-like Lipase/Acylhydrolase family
PF00135	17	Carboxylesterase family
PF01431	16	Peptidase family M13
PF00153	16	Mitochondrial carrier protein
PF00225	16	Kinesin motor domain
PF00632	16	HECT-domain (ubiquitin-transferase)
PF01341	16	Glycosyl hydrolases family 6
PF00759	16	Glycosyl hydrolase family 9
PF02015	16	Glycosyl hydrolase family 45
PF00122	16	E1-E2 ATPase
PF00083	15	Sugar (and other) transporter
PF00566	15	Rab-GTPase-TBC domain
PF00481	15	Protein phosphatase 2C
PF01399	15	PCI domain
PF00011	15	Hsp20/alpha crystallin family
PF01228	15	Glycine radical
PF13499	15	EF-hand domain pair
PF00160	15	Cyclophilin type peptidyl-prolyl cis-trans isomerase/CLD
PF00109	15	Beta-ketoacyl synthase, N-terminal domain
PF00227	14	Proteasome subunit
PF01423	14	LSM domain
PF02801	14	Beta-ketoacyl synthase, C-terminal domain
PF00023	14	Ankyrin repeat
PF00515	13	Tetratricopeptide repeat
PF00176	13	SNF2 family N-terminal domain
PF08238	13	Sel1 repeat
PF00620	13	RhoGAP domain
PF04408	13	Helicase associated domain (HA2)
PF02011	13	Glycosyl hydrolase family 48
PF00933	13	Glycosyl hydrolase family 3 N terminal domain
PF00583	13	Acetyltransferase (GNAT) family
PF07534	12	TLD
PF00118	12	TCP-1/cpn60 chaperonin family
PF16656	12	Purple acid Phosphatase, N-terminal domain
PF00293	12	NUDIX domain
PF01753	12	MYND finger
PF12799	12	Leucine Rich repeats (2 copies)
PF00665	12	Integrase core domain
PF00320	12	GATA zinc finger
PF00498	12	FHA domain
PF00134	12	Cyclin, N-terminal domain
PF13246	12	Cation transport ATPase (P-type)
PF00439	12	Bromodomain
PF00652	11	Ricin-type beta-trefoil lectin domain
PF07717	11	Oligonucleotide/oligosaccharide-binding (OB)-fold
PF16197	11	Ketoacyl-synthetase C-terminal extension
PF01398	11	JAB1/Mov34/MPN/PAD-1 ubiquitin protease
PF00009	11	Elongation factor Tu GTP binding domain
PF00003	11	7 transmembrane sweet-taste receptor of 3 GCPR
PF01926	11	50S ribosome-binding GTPase
PF00642	10	Zinc finger C-x8-C-x5-C-x3-H type (and similar)
PF11380	10	Stealth protein CR2, conserved region 2
PF00106	10	short chain dehydrogenase
PF01694	10	Rhomboid family
PF00787	10	PX domain
PF00550	10	Phosphopantetheine attachment site
PF00013	10	KH domain
PF08282	10	haloacid dehalogenase-like hydrolase
PF01585	10	G-patch domain
PF01055	10	Glycosyl hydrolases family 31
PF01915	10	Glycosyl hydrolase family 3 C-terminal domain
PF00331	10	Glycosyl hydrolase family 10
PF03537	10	Glycoside-hydrolase family GH114
PF14310	10	Fibronectin type III-like domain
PF12937	10	F-box-like
PF08613	10	Cyclin
PF00307	10	Calponin homology (CH) domain
PF00128	10	Alpha amylase, catalytic domain
PF01757	10	Acyltransferase family
PF00022	10	Actin
PF00107	9	Zinc-binding dehydrogenase
PF00092	9	von Willebrand factor type A domain
PF00627	9	UBA/TS-N domain
PF13414	9	TPR repeat
PF00899	9	ThiF family
PF04055	9	Radical SAM superfamily
PF00291	9	Pyridoxal-phosphate dependent enzyme
PF00063	9	Myosin head (motor domain)
PF00557	9	Metallopeptidase family M24
PF00520	9	Ion transport protein
PF03810	9	Importin-beta N-terminal domain
PF00534	9	Glycosyl transferases group 1
PF16561	9	Glycogen recognition site of AMP-activated protein kinase
PF00117	9	Glutamine amidotransferase class-I
PF03372	9	Endonuclease/Exonuclease/phosphatase family
PF03144	9	Elongation factor Tu domain 2
PF07002	9	Copine
PF00241	9	Cofilin/tropomyosin-type actin-binding protein
PF00385	9	Chromo (CHRromatin Organisation MOdifier) domain
PF03142	9	Chitin synthase
PF00656	9	Caspase domain
PF03422	9	Carbohydrate binding module (family 6)
PF01602	9	Adaptin N terminal region
PF02535	8	ZIP Zinc transporter
PF12171	8	Zinc-finger double-stranded RNA-binding
PF13920	8	Zinc finger, C3HC4 type (RING finger)
PF01490	8	Transmembrane amino acid transporter protein
PF05739	8	SNARE domain
PF00735	8	Septin
PF01369	8	Sec7 domain
PF00615	8	Regulator of G protein signaling domain
PF16212	8	Phospholipid-translocating P-type ATPase C-terminal
PF16209	8	Phospholipid-translocating ATPase N-terminal
PF00821	8	Phosphoenolpyruvate carboxykinase C-terminal P-loop domain
PF00454	8	Phosphatidylinositol 3- and 4-kinase
PF01432	8	Peptidase family M3
PF03031	8	NLI interacting factor-like phosphatase
PF00753	8	Metallo-beta-lactamase superfamily
PF00493	8	MCM2/3/5 family
PF17207	8	MCM OB domain
PF04724	8	Glycosyltransferase family 17
PF05637	8	galactosyl transferase GMA12/MNN10 family
PF13802	8	Galactose mutarotase-like
PF01363	8	FYVE zinc finger
PF00258	8	Flavodoxin
PF00780	8	CNH domain
PF03629	8	Carbohydrate esterase, sialic acid-specific acetylesterase
PF07859	8	alpha/beta hydrolase fold
PF01553	8	Acyltransferase
PF00698	8	Acyl transferase domain
PF00397	7	WW domain
PF14624	7	VWA / Hh protein intein-like
PF00789	7	UBX domain
PF00088	7	Trefoil (P-type) domain
PF03357	7	Snf7
PF02146	7	Sir2 family
PF08284	7	Retroviral aspartyl protease
PF03732	7	Retrotransposon gag protein
PF07714	7	Protein tyrosine kinase
PF11901	7	Protein of unknown function (DUF3421)
PF10584	7	Proteasome subunit A N-terminal signature
PF09820	7	Predicted AAA-ATPase
PF00130	7	Phorbol esters/diacylglycerol binding domain (C1 domain)
PF01433	7	Peptidase family M1 domain
PF01569	7	PAP2 superfamily
PF00249	7	Myb-like DNA-binding domain
PF04525	7	LURP-one-related
PF07885	7	Ion channel
PF00300	7	Histidine phosphatase superfamily (branch 1)
PF11904	7	GPCR-chaperone
PF00254	7	FKBP-type peptidyl-prolyl cis-trans isomerase
PF00782	7	Dual specificity phosphatase, catalytic domain
PF00136	7	DNA polymerase family B
PF01529	7	DHHC palmitoyltransferase
PF01217	7	Clathrin adaptor complex small chain
PF12894	7	Anaphase-promoting complex subunit 4 WD40 domain
PF13193	7	AMP-binding enzyme C-terminal domain
PF00696	7	Amino acid kinase family
PF08240	7	Alcohol dehydrogenase GroES-like domain
PF00025	7	ADP-ribosylation factor family
PF02148	6	Zn-finger in ubiquitin-hydrolases and other protein
PF04564	6	U-box domain
PF02358	6	Trehalose-phosphatase
PF16738	6	Starch-binding module 26
PF04810	6	Sec23/Sec24 zinc finger
PF04811	6	Sec23/Sec24 trunk domain
PF04815	6	Sec23/Sec24 helical domain
PF08033	6	Sec23/Sec24 beta-sandwich domain
PF01248	6	Ribosomal protein L7Ae/L30e/S12e/Gadd45 family
PF00617	6	RasGEF domain
PF00788	6	Ras association (RalGDS/AF-6) domain
PF00433	6	Protein kinase C terminal domain
PF00628	6	PHD-finger
PF05193	6	Peptidase M16 inactive domain
PF16863	6	N-terminal barrel of NtMGAM and CtMGAM, maltase-glucoamylase
PF10540	6	Munc13 (mammalian uncoordinated) homology domain
PF02815	6	MIR domain
PF02854	6	MIF4G domain
PF14551	6	MCM N-terminal domain
PF03330	6	Lytic transglycolase
PF01764	6	Lipase (class 3)
PF00412	6	LIM domain
PF00675	6	Insulinase (Peptidase family M16)
PF00447	6	HSF-type DNA-binding
PF00505	6	HMG (high mobility group) box
PF00850	6	Histone deacetylase domain
PF14623	6	Hint-domain
PF00010	6	Helix-loop-helix DNA-binding domain
PF00702	6	haloacid dehalogenase-like hydrolase
PF00982	6	Glycosyltransferase family 20
PF00288	6	GHMP kinases N terminal domain
PF02140	6	Galactose binding lectin domain
PF08662	6	Eukaryotic translation initiation factor eIF2A
PF02020	6	eIF4-gamma/eIF5/eIF2-epsilon
PF02366	6	Dolichyl-phosphate-mannose-protein mannosyltransferase
PF01556	6	DnaJ C terminal domain
PF03104	6	DNA polymerase family B, exonuclease domain
PF02826	6	D-isomer specific 2-hydroxyacid dehydrogenase, NAD binding domain
PF00389	6	D-isomer specific 2-hydroxyacid dehydrogenase, catalytic domain
PF00188	6	Cysteine-rich secretory protein family
PF00888	6	Cullin family
PF16192	6	C-terminal four TMM region of protein-O-mannosyltransferase
PF04969	6	CS domain
PF00571	6	CBS domain
PF14262	6	Carbohydrate-binding domain-containing protein Cthe_2159
PF01302	6	CAP-Gly domain
PF02517	6	CAAX protease self-immunity
PF00170	6	bZIP transcription factor
PF00514	6	Armadillo/beta-catenin-like repeat
PF02127	6	Aminopeptidase I zinc metalloprotease (M18)
PF00428	6	60s Acidic ribosomal protein
PF01138	6	3' exoribonuclease family, domain 1
PF07653	5	Variant SH3 domain
PF00133	5	tRNA synthetases class I (I, L, M and V)
PF13848	5	Thioredoxin-like domain
PF02775	5	Thiamine pyrophosphate enzyme, C-terminal TPP binding domain
PF00622	5	SPRY domain
PF01145	5	SPFH domain / Band 7 family
PF01758	5	Sodium Bile acid symporter family
PF04499	5	SIT4 phosphatase-associated protein
PF00995	5	Sec1 family
PF02037	5	SAP domain
PF05773	5	RWD domain
PF14608	5	RNA-binding, Nab2-type zinc finger
PF00072	5	Response regulator receiver domain
PF02463	5	RecF/RecN/SMC N terminal domain
PF01412	5	Putative GTPase activating protein for Arf
PF00326	5	Prolyl oligopeptidase family
PF04193	5	PQ loop repeat
PF01357	5	Pollen allergen
PF14572	5	Phosphoribosyl synthetase-associated domain
PF04191	5	Phospholipid methyltransferase
PF17297	5	Phosphoenolpyruvate carboxykinase N-terminal domain
PF00564	5	PB1 domain
PF00786	5	P21-Rho-binding domain
PF01336	5	OB-fold nucleic acid binding domain
PF02136	5	Nuclear transport factor 2 (NTF2) domain
PF13793	5	N-terminal domain of ribose phosphate pyrophosphokinase
PF05368	5	NmrA-like family
PF08241	5	Methyltransferase domain
PF13847	5	Methyltransferase domain
PF02847	5	MA3 domain
PF08513	5	LisH
PF04072	5	Leucine carboxyl methyltransferase
PF03381	5	LEM3 (ligand-effect modulator 3) family / CDC50 family
PF01741	5	Large-conductance mechanosensitive channel, MscL
PF00056	5	lactate/malate dehydrogenase, NAD binding domain
PF08659	5	KR domain
PF02558	5	Ketopantoate reductase PanE/ApbA
PF00180	5	Isocitrate/isopropylmalate dehydrogenase
PF00465	5	Iron-containing alcohol dehydrogenase
PF01008	5	Initiation factor 2 subunit family
PF00046	5	Homeobox domain
PF00682	5	HMGL-like
PF00808	5	Histone-like transcription factor (CBF/NF-Y) and archaeal histone
PF00328	5	Histidine phosphatase superfamily (branch 2)
PF03727	5	Hexokinase
PF14602	5	Hexapeptide repeat of succinyl-transferase
PF12783	5	Guanine nucleotide exchange factor in Golgi transport N-terminal
PF00616	5	GTPase-activator protein for Ras-like GTPase
PF01501	5	Glycosyl transferase family 8
PF00704	5	Glycosyl hydrolases family 18
PF02812	5	Glu/Leu/Phe/Val dehydrogenase, dimerisation domain
PF00626	5	Gelsolin repeat
PF00996	5	GDP dissociation inhibitor
PF01728	5	FtsJ-like methyltransferase
PF02181	5	Formin Homology 2 Domain
PF13287	5	Fn3 associated
PF00611	5	Fes/CIP4, and EFC/F-BAR homology domain
PF08389	5	Exportin 1-like protein
PF00929	5	Exonuclease
PF01105	5	emp24/gp25L/p24 family/GOLD
PF03143	5	Elongation factor Tu C-terminal domain
PF00892	5	EamA-like transporter family
PF16116	5	Domain of unknown function (DUF4832)
PF00610	5	Domain found in Dishevelled, Egl-10, and Pleckstrin (DEP)
PF08766	5	DEK C terminal domain
PF00027	5	Cyclic nucleotide-binding domain
PF10607	5	CTLH/CRA C-terminal to LisH motif domain
PF00650	5	CRAL/TRIO domain
PF00125	5	Core histone H2A/H2B/H3/H4
PF01066	5	CDP-alcohol phosphatidyltransferase
PF00689	5	Cation transporting ATPase, C-terminus
PF00690	5	Cation transporter/ATPase, N-terminus
PF01545	5	Cation efflux family
PF03370	5	Carbohydrate/starch-binding module (family 21)
PF02305	5	Capsid protein (F protein)
PF04427	5	Brix domain
PF00533	5	BRCA1 C Terminus (BRCT) domain
PF12706	5	Beta-lactamase superfamily domain
PF03114	5	BAR domain
PF00132	5	Bacterial transferase hexapeptide (six repeats)
PF13416	5	Bacterial extracellular solute-binding protein
PF00191	5	Annexin
PF00266	5	Aminotransferase class-V
PF01263	5	Aldose 1-epimerase
PF02883	5	Adaptin C-terminal domain
PF13840	5	ACT domain
PF13086	5	AAA domain
PF13087	5	AAA domain
PF03725	5	3' exoribonuclease family, domain 2
PF00098	4	Zinc knuckle
PF00096	4	Zinc finger, C2H2 type
PF06769	4	YoeB-like toxin of bacterial type II toxin-antitoxin system
PF09336	4	Vps4 C terminal oligomerisation domain
PF00790	4	VHS domain
PF03162	4	Tyrosine phosphatase family
PF00091	4	Tubulin/FtsZ family, GTPase domain
PF03953	4	Tubulin C-terminal domain
PF00749	4	tRNA synthetases class I (E and Q), catalytic domain
PF03950	4	tRNA synthetases class I (E and Q), anti-codon binding domain
PF00587	4	tRNA synthetase class II core domain (G, H, P, S and T)
PF03151	4	Triose-phosphate Transporter family
PF00456	4	Transketolase, thiamine diphosphate binding domain
PF02779	4	Transketolase, pyrimidine binding domain
PF02780	4	Transketolase, C-terminal domain
PF01096	4	Transcription factor S-II (TFIIS)
PF02776	4	Thiamine pyrophosphate enzyme, N-terminal TPP binding domain
PF00205	4	Thiamine pyrophosphate enzyme, central domain
PF08711	4	TFIIS helical bundle-like domain
PF00335	4	Tetraspanin family
PF00957	4	Synaptobrevin
PF14938	4	Soluble NSF attachment protein, SNAP
PF01699	4	Sodium/calcium exchanger protein
PF12352	4	Snare region anchored in the vesicle membrane C-terminus
PF12146	4	Serine aminopeptidase, S33
PF07647	4	SAM domain (Sterile alpha motif)
PF00536	4	SAM domain (Sterile alpha motif)
PF00575	4	S1 RNA binding domain
PF00773	4	RNB domain
PF11717	4	RNA binding activity-knot of a chromodomain
PF01163	4	RIO1 family
PF08069	4	Ribosomal S13/S15 N-terminal domain
PF00415	4	Regulator of chromosome condensation (RCC1) repeat
PF00637	4	Region in Clathrin and VPS
PF00618	4	RasGEF N-terminal motif
PF08423	4	Rad51
PF01472	4	PUA domain
PF01937	4	Protein of unknown function DUF89
PF00432	4	Prenyltransferase and squalene oxidase repeat
PF01920	4	Prefoldin subunit
PF04515	4	Plasma-membrane choline transporter
PF00156	4	Phosphoribosyl transferase domain
PF00365	4	Phosphofructokinase
PF01504	4	Phosphatidylinositol-4-phosphate 5-Kinase
PF01095	4	Pectinesterase
PF12784	4	PD-(D/E)XK nuclease family transposase
PF00175	4	Oxidoreductase NAD-binding domain
PF01909	4	Nucleotidyltransferase domain
PF00483	4	Nucleotidyl transferase
PF00334	4	Nucleoside diphosphate kinase
PF00724	4	NADH:flavin oxidoreductase / NADH oxidase family
PF02142	4	MGS-like domain
PF13347	4	MFS/sugar transport protein
PF13649	4	Methyltransferase domain
PF16661	4	Metallo-beta-lactamase superfamily domain
PF01554	4	MatE
PF11051	4	Mannosyltransferase putative
PF13012	4	Maintenance of mitochondrial structure and function
PF14521	4	Lysine-specific metallo-endopeptidase
PF00206	4	Lyase
PF10601	4	LITAF-like zinc ribbon domain
PF02866	4	lactate/malate dehydrogenase, alpha/beta C-terminal domain
PF12998	4	Inhibitor of growth proteins N-terminal histone-binding
PF13589	4	Histidine kinase-, DNA gyrase B-, and HSP90-like ATPase
PF02518	4	Histidine kinase-, DNA gyrase B-, and HSP90-like ATPase
PF00349	4	Hexokinase
PF13513	4	HEAT-like repeat
PF12710	4	haloacid dehalogenase-like hydrolase
PF00722	4	Glycosyl hydrolases family 16
PF00462	4	Glutaredoxin
PF00208	4	Glutamate/Leucine/Phenylalanine/Valine dehydrogenase
PF08544	4	GHMP kinases C terminal
PF16363	4	GDP-mannose 4,6 dehydratase
PF04082	4	Fungal specific transcription factor domain
PF08550	4	Fungal protein of unknown function (DUF1752)
PF02260	4	FATC domain
PF02259	4	FAT domain
PF00890	4	FAD binding domain
PF00667	4	FAD binding domain
PF11838	4	ERAP1-like C-terminal domain
PF14492	4	Elongation Factor G, domain II
PF00679	4	Elongation factor G C-terminus
PF16297	4	Domain of unknown function (DUF4939)
PF16173	4	Domain of unknown function (DUF4874)
PF13959	4	Domain of unknown function (DUF4217)
PF02656	4	Domain of unknown function (DUF202)
PF01119	4	DNA mismatch repair protein, C-terminal domain
PF16213	4	Dimerisation and cyclophilin-binding domain of Mon2
PF01843	4	DIL domain
PF12763	4	Cytoskeletal-regulatory complex EF hand
PF02984	4	Cyclin, C-terminal domain
PF10557	4	Cullin protein neddylation domain
PF10431	4	C-terminal, D2-small domain, of ClpB protein
PF13865	4	C-terminal duplication domain of Friend of PRMT1
PF13385	4	Concanavalin A-like lectin/glucanases superfamily
PF02629	4	CoA binding domain
PF12348	4	CLASP N terminal
PF03828	4	Cid1 family poly A polymerase
PF00988	4	Carbamoyl-phosphate synthase small chain, CPSase domain
PF02786	4	Carbamoyl-phosphate synthase L chain, ATP binding domain
PF07742	4	BTG family
PF17035	4	Bromodomain extra-terminal - transcription regulation
PF01062	4	Bestrophin, RFP-TM, chloride channel
PF00006	4	ATP synthase alpha/beta family, nucleotide-binding domain
PF02874	4	ATP synthase alpha/beta family, beta-barrel domain
PF02729	4	Aspartate/ornithine carbamoyltransferase, carbamoyl-P binding domain
PF00185	4	Aspartate/ornithine carbamoyltransferase, Asp/Orn binding domain
PF08264	4	Anticodon-binding domain of tRNA
PF03129	4	Anticodon binding domain
PF01428	4	AN1-like Zinc finger
PF02806	4	Alpha amylase, C-terminal all-beta domain
PF00928	4	Adaptor complexes medium subunit family
PF00330	4	Aconitase family (aconitate hydratase)
PF00694	4	Aconitase C-terminal domain
PF13302	4	Acetyltransferase (GNAT) domain
PF12848	4	ABC transporter
PF07724	4	AAA domain (Cdc48 subfamily)
PF13353	4	4Fe-4S single cluster domain
PF07521	3	Zn-dependent metallo-hydrolase RNA specificity domain
PF13917	3	Zinc knuckle
PF00569	3	Zinc finger, ZZ type
PF13923	3	Zinc finger, C3HC4 type (RING finger)
PF04893	3	Yip1 domain
PF14308	3	X-domain of DnaJ-containing
PF09359	3	VTC domain
PF08700	3	Vps51/Vps67
PF00654	3	Voltage gated chloride channel
PF10367	3	Vacuolar sorting protein 39 domain 2
PF15456	3	Up-regulated During Septation
PF00201	3	UDP-glucoronosyl and UDP-glucosyl transferase
PF14555	3	UBA-like domain
PF08449	3	UAA transporter family
PF16300	3	Type of WD40 repeat
PF01663	3	Type I phosphodiesterase / nucleotide pyrophosphatase
PF00152	3	tRNA synthetases class II (D, K and N)
PF00579	3	tRNA synthetases class I (W and Y)
PF01142	3	tRNA pseudouridine synthase D (TruD)
PF08303	3	tRNA ligase kinase domain
PF04051	3	Transport protein particle (TRAPP) component
PF01751	3	Toprim domain
PF03798	3	TLC domain
PF02466	3	Tim17/Tim22/Tim23/Pmp24 family
PF02953	3	Tim10/DDP family zinc finger
PF13424	3	Tetratricopeptide repeat
PF03645	3	Tctex-1 family
PF03134	3	TB2/DP1, HVA22 family
PF01026	3	TatD related DNase
PF00804	3	Syntaxin
PF08231	3	SYF2 splicing factor
PF04433	3	SWIRM domain
PF00916	3	Sulfate permease family
PF17101	3	Stealth protein CR1, conserved region 1
PF08616	3	Stabilization of polarity axis
PF03105	3	SPX domain
PF04130	3	Spc97 / Spc98 family
PF00474	3	Sodium:solute symporter family
PF00375	3	Sodium:dicarboxylate symporter family
PF00999	3	Sodium/hydrogen exchanger family
PF01798	3	snoRNA binding domain, fibrillarin
PF04855	3	SNF5 / SMARCB1 / INI1
PF03931	3	Skp1 family, tetramerisation domain
PF01466	3	Skp1 family, dimerisation domain
PF03876	3	SHS2 domain found in N terminus of Rpb7p/Rpc25p/MJ0397
PF16891	3	Serine-threonine protein phosphatase N-terminal domain
PF00464	3	Serine hydroxymethyltransferase
PF03959	3	Serine hydrolase (FSH1)
PF02889	3	Sec63 Brl domain
PF11969	3	Scavenger mRNA decapping enzyme C-term binding
PF02772	3	S-adenosylmethionine synthetase, central domain
PF02383	3	SacI homology domain
PF03399	3	SAC3/GANP family
PF01479	3	S4 domain
PF13234	3	rRNA-processing arch domain
PF05879	3	Root hair defective 3 GTP-binding protein (RHD3)
PF00849	3	RNA pseudouridylate synthase
PF04560	3	RNA polymerase Rpb2, domain 7
PF00562	3	RNA polymerase Rpb2, domain 6
PF04565	3	RNA polymerase Rpb2, domain 3
PF04998	3	RNA polymerase Rpb1, domain 5
PF05000	3	RNA polymerase Rpb1, domain 4
PF04818	3	RNA polymerase II-binding domain.
PF04563	3	RNA polymerase beta subunit
PF08777	3	RNA binding motif
PF12906	3	RING-variant domain
PF12678	3	RING-H2 zinc finger domain
PF14570	3	RING/Ubox like zinc-binding domain
PF01201	3	Ribosomal protein S8e
PF03719	3	Ribosomal protein S5, C-terminal domain
PF01090	3	Ribosomal protein S19e
PF00312	3	Ribosomal protein S15
PF00281	3	Ribosomal protein L5
PF01655	3	Ribosomal protein L32
PF00327	3	Ribosomal protein L30p/L7e
PF01246	3	Ribosomal protein L24e
PF01780	3	Ribosomal L37ae protein family
PF08079	3	Ribosomal L30 N-terminal domain
PF00581	3	Rhodanese-like domain
PF06045	3	Rhamnogalacturonate lyase family
PF08542	3	Replication factor C C-terminal domain
PF13774	3	Regulated-SNARE-like domain
PF02145	3	Rap/ran-GAP
PF00638	3	RanBP1 domain
PF00224	3	Pyruvate kinase, barrel domain
PF07992	3	Pyridine nucleotide-disulphide oxidoreductase
PF01480	3	PWI domain
PF01588	3	Putative tRNA binding domain
PF00806	3	Pumilio-family RNA binding repeat
PF04468	3	PSP1 C-terminal conserved region
PF04046	3	PSP
PF01239	3	Protein prenyltransferase alpha subunit repeat
PF06966	3	Protein of unknown function (DUF1295)
PF01080	3	Presenilin
PF08190	3	pre-RNA processing PIH1/Nop17
PF02996	3	Prefoldin subunit
PF14683	3	Polysaccharide lyase family 4, domain III
PF14686	3	Polysaccharide lyase family 4, domain II
PF14765	3	Polyketide synthase dehydratase
PF15405	3	Pleckstrin homology domain
PF05664	3	Plant family of unknown function (DUF810)
PF13638	3	PIN domain
PF01048	3	Phosphorylase superfamily
PF00485	3	Phosphoribulokinase / Uridine kinase family
PF01238	3	Phosphomannose isomerase type I
PF02878	3	Phosphoglucomutase/phosphomannomutase, alpha/beta/alpha domain I
PF02114	3	Phosducin
PF13832	3	PHD-zinc-finger like domain
PF00294	3	pfkB family carbohydrate kinase
PF04757	3	Pex2 / Pex12 amino terminal region
PF00544	3	Pectate lyase
PF08011	3	PD-(D/E)XK nuclease superfamily
PF00989	3	PAS fold
PF02671	3	Paired amphipathic helix repeat
PF01408	3	Oxidoreductase family, NAD-binding Rossmann fold
PF02338	3	OTU-like cysteine protease
PF04142	3	Nucleotide-sugar transporter
PF11894	3	Nuclear pore complex scaffold, nucleoporins 186/192/205
PF10609	3	NUBPL iron-transfer P-loop NTPase
PF04153	3	NOT2 / NOT3 / NOT5 family
PF04147	3	Nop14-like family
PF00881	3	Nitroreductase family
PF05224	3	NDT80 / PhoG like DNA-binding family
PF03553	3	Na+/H+ antiporter family
PF00784	3	MyTH4 domain
PF10433	3	Mono-functional DNA-alkylating methyl methanesulfonate N-term
PF03637	3	Mob1/phocein family
PF04212	3	MIT (microtubule interacting and transport) domain
PF01875	3	Memo-like protein
PF00924	3	Mechanosensitive ion channel
PF01575	3	MaoC like domain
PF12464	3	Maltose acetyltransferase
PF10294	3	Lysine methyltransferase
PF00538	3	linker histone H1 and H5 family
PF05383	3	La domain
PF03730	3	Ku70/Ku80 C-terminal arm
PF02735	3	Ku70/Ku80 beta-barrel domain
PF02906	3	Iron only hydrogenase large subunit, C-terminal domain
PF02256	3	Iron hydrogenase small subunit
PF03770	3	Inositol polyphosphate kinase
PF04762	3	IKI3 family
PF12436	3	ICP0-binding domain of Ubiquitin-specific protease 7
PF01154	3	Hydroxymethylglutaryl-coenzyme A synthase N terminal
PF08540	3	Hydroxymethylglutaryl-coenzyme A synthase C terminal
PF02110	3	Hydroxyethylthiazole kinase family
PF00183	3	Hsp90 protein
PF02185	3	Hr1 repeat
PF12265	3	Histone-binding protein RBBP4 or subunit C of CAF1 complex
PF08512	3	Histone chaperone Rttp106-like
PF00512	3	His Kinase A (phospho-acceptor) domain
PF13646	3	HEAT repeats
PF13344	3	Haloacid dehalogenase-like hydrolase
PF13242	3	HAD-hyrolase-like
PF02893	3	GRAM domain
PF00503	3	G-protein alpha subunit
PF01151	3	GNS1/SUR4 family
PF00535	3	Glycosyl transferase family 2
PF02156	3	Glycosyl hydrolase family 26
PF00044	3	Glyceraldehyde 3-phosphate dehydrogenase, NAD binding domain
PF02800	3	Glyceraldehyde 3-phosphate dehydrogenase, C-terminal domain
PF17171	3	Glutathione S-transferase, C-terminal domain
PF14497	3	Glutathione S-transferase, C-terminal domain
PF05916	3	GINS complex protein
PF00631	3	GGL domain
PF00657	3	GDSL-like Lipase/Acylhydrolase
PF01150	3	GDA1/CD39 (nucleoside phosphatase) family
PF02128	3	Fungalysin metallopeptidase (M36)
PF00172	3	Fungal Zn(2)-Cys(6) binuclear cluster domain
PF01613	3	Flavin reductase like domain
PF05965	3	F/Y rich C-terminus
PF14382	3	Exosome complex exonuclease RRP4 N-terminal region
PF04777	3	Erv1 / Alr family
PF03764	3	Elongation factor G, domain IV
PF00036	3	EF hand
PF00350	3	Dynamin family
PF16016	3	Domain of unknown function (DUF4782)
PF04037	3	Domain of unknown function (DUF382)
PF04042	3	DNA polymerase alpha/epsilon subunit B
PF04003	3	Dip2/Utp12 Family
PF01207	3	Dihydrouridine synthase (Dus)
PF09737	3	De-etiolated protein 1 Det1
PF14703	3	Cytosolic domain of 10TM putative phosphate transporter
PF00173	3	Cytochrome b5-like Heme/Steroid binding domain
PF00383	3	Cytidine and deoxycytidylate deaminase zinc-binding region
PF02845	3	CUE domain
PF16206	3	C-terminal region of Mon2 protein
PF10075	3	CSN8/PSMD8/EIF3K family
PF03765	3	CRAL/TRIO, N-terminal domain
PF03178	3	CPSF A subunit region
PF03029	3	Conserved hypothetical ATP binding protein
PF00668	3	Condensation domain
PF06244	3	Coiled-coil domain-containing protein 124
PF04053	3	Coatomer WD associated region
PF00549	3	CoA-ligase
PF03600	3	Citrate transporter
PF05495	3	CHY zinc finger
PF13290	3	Chitobiase/beta-hexosaminidase C-terminal domain
PF09394	3	Chagasin family peptidase inhibitor I42
PF03914	3	CBF/Mak21 family
PF01214	3	Casein kinase II regulatory subunit
PF00795	3	Carbon-nitrogen hydrolase
PF02922	3	Carbohydrate-binding module 48 (Isoamylase N-terminal domain)
PF16990	3	Carbohydrate binding module (family 35)
PF10645	3	Carbohydrate binding
PF02787	3	Carbamoyl-phosphate synthetase large chain, oligomerisation domain
PF00262	3	Calreticulin family
PF02714	3	Calcium-dependent channel, 7TM region, putative phosphate
PF04857	3	CAF1 family ribonuclease
PF12756	3	C2H2 type zinc-finger (2 copies)
PF16589	3	BRCT domain, a BRCA1 C-terminus domain
PF01212	3	Beta-eliminating lyase
PF10996	3	Beta-Casp domain
PF02991	3	Autophagy protein Atg8 ubiquitin like
PF00137	3	ATP synthase subunit C
PF06456	3	Arfaptin-like domain
PF01063	3	Amino-transferase class IV
PF12697	3	Alpha/beta hydrolase family
PF03901	3	Alg9-like mannosyltransferase family
PF00171	3	Aldehyde dehydrogenase family
PF00211	3	Adenylate and Guanylate cyclase catalytic domain
PF00887	3	Acyl CoA binding protein
PF01842	3	ACT domain
PF13508	3	Acetyltransferase (GNAT) domain
PF07991	3	Acetohydroxy acid isomeroreductase, NADPH-binding domain
PF13671	3	AAA domain
PF12838	3	4Fe-4S dicluster domain
PF02737	3	3-hydroxyacyl-CoA dehydrogenase, NAD binding domain
PF00725	3	3-hydroxyacyl-CoA dehydrogenase, C-terminal domain
PF00233	3	3'5'-cyclic nucleotide phosphodiesterase
PF01189	3	16S rRNA methyltransferase RsmB/F
PF00641	2	Zn-finger in Ran binding protein and others
PF09223	2	ZinT (YodA) periplasmic lipocalin-like zinc-recruitment
PF17120	2	Zinc-ribbon, C4HC2 type
PF11789	2	Zinc-finger of the MIZ type in Nse subunit
PF12874	2	Zinc-finger of C2H2 type
PF13696	2	Zinc knuckle
PF00097	2	Zinc finger, C3HC4 type (RING finger)
PF03853	2	YjeF-related protein N-terminus
PF03366	2	YEATS family
PF03159	2	XRN 5'-3' exonuclease N-terminus
PF02129	2	X-Pro dipeptidyl-peptidase (S15 family)
PF00867	2	XPG I-region
PF05406	2	WGR domain
PF04494	2	WD40 associated region in TFIID subunit, NTD2 domain
PF01496	2	V-type ATPase 116kDa subunit family
PF04652	2	Vta1 like
PF09325	2	Vps5 C terminal like
PF13519	2	von Willebrand factor type A domain
PF01044	2	Vinculin family
PF12932	2	Vesicle coat trafficking protein Sec16 mid-region
PF11754	2	Velvet factor
PF10458	2	Valyl tRNA synthetase tRNA binding arm
PF02204	2	Vacuolar sorting protein 9 (VPS9) domain
PF10366	2	Vacuolar sorting protein 39 domain 1
PF10186	2	Vacuolar sorting 38 and autophagy-related subunit 14
PF04133	2	Vacuolar protein sorting 55
PF01704	2	UTP--glucose-1-phosphate uridylyltransferase
PF14681	2	Uracil phosphoribosyltransferase
PF06017	2	Unconventional myosin tail, actin- and lipid-binding
PF10164	2	Uncharacterized conserved protein (DUF2367)
PF09741	2	Uncharacterized conserved protein (DUF2045)
PF05255	2	Uncharacterised protein family (UPF0220)
PF03661	2	Uncharacterised protein family (UPF0121)
PF02902	2	Ulp1 protease family, C-terminal catalytic domain
PF14533	2	Ubiquitin-specific protease C-terminal
PF13881	2	Ubiquitin-2 like Rad60 SUMO-like
PF03152	2	Ubiquitin fusion degradation protein UFD1
PF01088	2	Ubiquitin carboxyl-terminal hydrolase, family 1
PF13350	2	Tyrosine phosphatase family
PF12738	2	twin BRCT domain
PF03133	2	Tubulin-tyrosine ligase family
PF03542	2	Tuberin
PF00290	2	Tryptophan synthase alpha chain
PF01509	2	TruB family pseudouridylate synthase (N terminal domain)
PF12718	2	Tropomyosin like
PF09334	2	tRNA synthetases class I (M)
PF16198	2	tRNA pseudouridylate synthase B C-terminal domain
PF01416	2	tRNA pseudouridine synthase
PF08626	2	Transport protein Trs120 or TRAPPC9, TRAPP II complex subunit
PF03839	2	Translocation protein Sec62
PF11176	2	Translation machinery-associated protein 16
PF01253	2	Translation initiation factor SUI1
PF01176	2	Translation initiation factor 1A / IF-1
PF03847	2	Transcription initiation factor TFIID subunit A
PF05793	2	Transcription initiation factor IIF, alpha subunit (TFIIF-alpha)
PF02269	2	Transcription initiation factor IID, 18kD subunit
PF11732	2	Transcription- and export-related complex subunit
PF16131	2	Torus domain
PF06068	2	TIP49 C-terminus
PF05029	2	Timeless protein C terminal region
PF07973	2	Threonyl and Alanyl tRNA synthetase second additional domain
PF16134	2	THO complex subunit 2 N-terminus
PF13899	2	Thioredoxin-like
PF03061	2	Thioesterase superfamily
PF02581	2	Thiamine monophosphate synthase
PF02824	2	TGS domain
PF13432	2	Tetratricopeptide repeat
PF12247	2	Temperature dependent protein affecting M2 dsRNA replication
PF12246	2	Temperature dependent protein affecting M2 dsRNA replication
PF04099	2	Sybindin-like family
PF16495	2	SWIRM-associated region 1
PF16496	2	SWIRM-associated domain at the N-terminal
PF02201	2	SWIB/MDM2 domain
PF12752	2	SUZ domain
PF01805	2	Surp module
PF02077	2	SURF4 family
PF05843	2	Suppressor of forked protein (Suf)
PF02200	2	STE like transcription factor
PF01740	2	STAS domain
PF16073	2	Starter unit:ACP transacylase in aflatoxin biosynthesis
PF07228	2	Stage II sporulation protein E (SpoIIE)
PF02881	2	SRP54-type protein, helical bundle domain
PF00448	2	SRP54-type protein, GTPase domain
PF10263	2	SprT-like family
PF01564	2	Spermine/spermidine synthase domain
PF17284	2	Spermidine synthase tetramerisation domain
PF08518	2	Spa2 homology domain (SHD) of GIT
PF15901	2	Sortilin, neurotensin receptor 3, C-terminal
PF15902	2	Sortilin, neurotensin receptor 3,
PF00209	2	Sodium:neurotransmitter symporter family
PF01713	2	Smr domain
PF03983	2	SLA1 homology domain 1, SHD1
PF08295	2	Sin3 family co-repressor
PF04573	2	Signal peptidase subunit
PF06650	2	SHR-binding domain of vacuolar-sorting associated protein 13
PF00450	2	Serine carboxypeptidase
PF01118	2	Semialdehyde dehydrogenase, NAD binding domain
PF04628	2	Sedlin, N-terminal conserved region
PF12931	2	Sec23-binding domain of Sec16
PF04000	2	Sas10/Utp3/C1D family
PF16978	2	SAPK-interacting protein 1 (Sin1), middle CRIM domain
PF00438	2	S-adenosylmethionine synthetase, N-terminal domain
PF02773	2	S-adenosylmethionine synthetase, C-terminal domain
PF07738	2	Sad1 / UNC-like C-terminal
PF04641	2	Rtf2 RING-finger
PF17216	2	Rrp44-like cold shock domain
PF10443	2	RNA12 protein
PF02150	2	RNA polymerases M/15 Kd subunit
PF01000	2	RNA polymerase Rpb3/RpoA insert domain
PF13656	2	RNA polymerase Rpb3/Rpb11 dimerisation domain
PF01193	2	RNA polymerase Rpb3/Rpb11 dimerisation domain
PF04567	2	RNA polymerase Rpb2, domain 5
PF04566	2	RNA polymerase Rpb2, domain 4
PF04983	2	RNA polymerase Rpb1, domain 3
PF00623	2	RNA polymerase Rpb1, domain 2
PF04997	2	RNA polymerase Rpb1, domain 1
PF09511	2	RNA ligase
PF01137	2	RNA 3'-terminal phosphate cyclase
PF01251	2	Ribosomal protein S7e
PF00333	2	Ribosomal protein S5, N-terminal domain
PF01200	2	Ribosomal protein S28e
PF01667	2	Ribosomal protein S27
PF00318	2	Ribosomal protein S2
PF00347	2	Ribosomal protein L6
PF01907	2	Ribosomal protein L37e
PF00687	2	Ribosomal protein L1p/L10e family
PF06325	2	Ribosomal protein L11 methyltransferase (PrmA)
PF00466	2	Ribosomal protein L10
PF01778	2	Ribosomal L28e protein family
PF00827	2	Ribosomal L15
PF00445	2	Ribonuclease T2 family
PF01872	2	RibD C-terminal domain
PF07727	2	Reverse transcriptase (RNA-dependent DNA polymerase)
PF10257	2	Retinoic acid induced 16-like protein
PF03055	2	Retinal pigment epithelial membrane protein
PF03248	2	Rer1 family
PF08519	2	Replication factor RFC1 C terminal domain
PF16124	2	RecQ zinc-binding
PF03835	2	Rad4 transglutaminase-like domain
PF10405	2	Rad4 beta-hairpin domain 3
PF10404	2	Rad4 beta-hairpin domain 2
PF10403	2	Rad4 beta-hairpin domain 1
PF03215	2	Rad17 cell cycle checkpoint protein
PF02445	2	Quinolinate synthetase A protein
PF02749	2	Quinolinate phosphoribosyl transferase, N-terminal domain
PF02887	2	Pyruvate kinase, alpha/beta domain
PF05822	2	Pyrimidine 5'-nucleotidase (UMPH-1)
PF06738	2	Putative threonine/serine exporter
PF05057	2	Putative serine esterase (DUF676)
PF01170	2	Putative RNA methylase family UPF0020
PF01471	2	Putative peptidoglycan binding domain
PF01866	2	Putative diphthamide synthesis protein
PF10350	2	Putative death-receptor fusion protein (DUF2428)
PF03371	2	PRP38 family
PF00102	2	Protein-tyrosine phosphatase
PF04676	2	Protein similar to CwfJ C-terminus 2
PF04677	2	Protein similar to CwfJ C-terminus 1
PF07491	2	Protein phosphatase inhibitor
PF05277	2	Protein of unknown function (DUF726)
PF04577	2	Protein of unknown function (DUF563)
PF12541	2	Protein of unknown function (DUF3737)
PF12449	2	Protein of unknown function (DUF3684)
PF12051	2	Protein of unknown function (DUF3533)
PF10332	2	Protein of unknown function (DUF2418)
PF10176	2	Protein of unknown function (DUF2370)
PF02995	2	Protein of unknown function (DUF229)
PF07159	2	Protein of unknown function (DUF1394)
PF06544	2	Protein of unknown function (DUF1115)
PF06417	2	Protein of unknown function (DUF1077)
PF01851	2	Proteasome/cyclosome repeat
PF04194	2	Programmed cell death protein 2, C-terminal putative domain
PF12627	2	Probable RNA and SrmB- binding site of polymerase A
PF08799	2	pre-mRNA processing factor 4 (PRP4) like
PF04707	2	PRELI-like family
PF01171	2	PP-loop family
PF00854	2	POT family
PF04068	2	Possible Fer4-like domain in RNase L inhibitor, RLI
PF00348	2	Polyprenyl synthetase
PF00658	2	Poly-adenylate binding protein, unique domain
PF02877	2	Poly(ADP-ribose) polymerase, regulatory domain
PF00644	2	Poly(ADP-ribose) polymerase catalytic domain
PF01743	2	Poly A polymerase head domain
PF12780	2	P-loop containing dynein motor region D4
PF03501	2	Plectin/S10 domain
PF16652	2	Pleckstrin homology domain
PF15411	2	Pleckstrin homology domain
PF02171	2	Piwi domain
PF08320	2	PIG-X / PBN1
PF03095	2	Phosphotyrosyl phosphate activator (PTPA) protein
PF08543	2	Phosphomethylpyrimidine kinase
PF00613	2	Phosphoinositide 3-kinase family, accessory domain (PIK domain)
PF00162	2	Phosphoglycerate kinase
PF00408	2	Phosphoglucomutase/phosphomannomutase, C-terminal domain
PF02880	2	Phosphoglucomutase/phosphomannomutase, alpha/beta/alpha domain III
PF02879	2	Phosphoglucomutase/phosphomannomutase, alpha/beta/alpha domain II
PF02666	2	Phosphatidylserine decarboxylase
PF00388	2	Phosphatidylinositol-specific phospholipase C, X domain
PF10032	2	Phosphate transport (Pho88)
PF13831	2	PHD-finger
PF04695	2	Peroxisomal membrane anchor protein (Pex14p) conserved region
PF05648	2	Peroxisomal biogenesis factor 11 (PEX11)
PF04882	2	Peroxin-3
PF00717	2	Peptidase S24-like
PF05922	2	Peptidase inhibitor I9
PF01435	2	Peptidase family M48
PF01434	2	Peptidase family M41
PF01546	2	Peptidase family M20/M25/M40
PF01650	2	Peptidase C13 family
PF02170	2	PAZ domain
PF02225	2	PA domain
PF01237	2	Oxysterol-binding protein
PF02894	2	Oxidoreductase family, C-terminal alpha/beta domain
PF10568	2	Outer mitochondrial membrane transport complex protein
PF04084	2	Origin recognition complex subunit 2
PF14587	2	O-Glycosyl hydrolase family 30
PF04097	2	Nup93/Nic96
PF00956	2	Nucleosome assembly protein (NAP)
PF07670	2	Nucleoside recognition
PF03825	2	Nucleoside H+ symporter
PF04096	2	Nucleoporin autopeptidase
PF05997	2	Nucleolar protein,Nop52
PF12110	2	Nuclear protein 96
PF08159	2	NUC153 domain
PF10197	2	N-terminal domain of CBF1 interacting co-repressor CIR
PF16486	2	N-terminal domain of argonaute
PF08156	2	NOP5NT (NUC127) domain
PF12717	2	non-SMC mitotic condensation complex subunit 1
PF03177	2	Non-repetitive/WGA-negative nucleoporin C-terminal
PF04981	2	NMD3 family
PF08154	2	NLE (NUC135) domain
PF03060	2	Nitronate monooxygenase
PF05450	2	Nicastrin
PF04768	2	NAT, N-acetyltransferase, of N-acetylglutamate synthase
PF10588	2	NADH-ubiquinone oxidoreductase-G iron-sulfur binding region
PF13460	2	NAD(P)H-binding
PF01370	2	NAD dependent epimerase/dehydratase family
PF01849	2	NAC domain
PF07994	2	Myo-inositol-1-phosphate synthase
PF13921	2	Myb-like DNA-binding domain
PF15963	2	Myb DNA-binding like
PF00488	2	MutS domain V
PF05192	2	MutS domain III
PF05188	2	MutS domain II
PF01624	2	MutS domain I
PF05063	2	MT-A70
PF00635	2	MSP (Major sperm protein) domain
PF16575	2	mRNA cleavage and polyadenylation factor CLP1 P-loop
PF05712	2	MRG
PF01853	2	MOZ/SAS family
PF02891	2	MIZ/SP-RING zinc finger
PF05557	2	Mitotic checkpoint protein
PF02966	2	Mitosis protein DIM1
PF16487	2	Mid domain of argonaute
PF12777	2	Microtubule-binding stalk of dynein motor
PF12002	2	MgsA AAA+ ATPase C terminal
PF05175	2	Methyltransferase small domain
PF13489	2	Methyltransferase domain
PF01676	2	Metalloenzyme superfamily
PF03062	2	MBOAT, membrane-bound O-acyltransferase family
PF09402	2	Man1-Src1p-C-terminal domain
PF00390	2	Malic enzyme, N-terminal domain
PF03949	2	Malic enzyme, NAD binding domain
PF04112	2	Mak10 subunit, NatC N(alpha)-terminal acetyltransferase
PF10296	2	Maintenance of mitochondrial morphology protein 1
PF01661	2	Macro domain
PF01476	2	LysM domain
PF01451	2	Low molecular weight phosphotyrosine protein phosphatase
PF05362	2	Lon protease (S16) C-terminal proteolytic domain
PF04791	2	LMBR1-like membrane protein
PF04571	2	lipin, N-terminal conserved region
PF02275	2	Linear amide C-N hydrolases, choloylglycine hydrolase family
PF09127	2	Leukotriene A4 hydrolase, C-terminal
PF14580	2	Leucine-rich repeat
PF03388	2	Legume-like lectin family
PF13967	2	Late exocytosis, associated with Golgi transport
PF03731	2	Ku70/Ku80 N-terminal alpha/beta domain
PF08785	2	Ku C terminal domain like
PF00467	2	KOW motif
PF02149	2	Kinase associated domain 1
PF15985	2	KH domain
PF08546	2	Ketopantoate reductase PanE/ApbA C terminal
PF02548	2	Ketopantoate hydroxymethyltransferase
PF04140	2	Isoprenylcysteine carboxyl methyltransferase (ICMT) family
PF01521	2	Iron-sulphur cluster biosynthesis
PF01833	2	IPT/TIG domain
PF00459	2	Inositol monophosphatase family
PF00719	2	Inorganic pyrophosphatase
PF00653	2	Inhibitor of Apoptosis domain
PF00218	2	Indole-3-glycerol phosphate synthase
PF01749	2	Importin beta binding domain
PF00478	2	IMP dehydrogenase / GMP reductase domain
PF07529	2	HSA
PF00742	2	Homoserine dehydrogenase
PF01230	2	HIT domain
PF00815	2	Histidinol dehydrogenase
PF00977	2	Histidine biosynthesis protein
PF13307	2	Helicase C-terminal domain
PF13419	2	Haloacid dehalogenase-like hydrolase
PF04670	2	Gtr1/RagA G protein conserved region
PF09729	2	Gti1/Pac2 family
PF01025	2	GrpE
PF01465	2	GRIP domain
PF04495	2	GRASP55/65 PDZ-like domain
PF06728	2	GPI transamidase subunit PIG-U
PF04178	2	Got1/Sft2-like family
PF10351	2	Golgi-body localisation protein domain
PF00903	2	Glyoxalase/Bleomycin resistance protein/Dioxygenase superfamily
PF04488	2	Glycosyltransferase sugar-binding region containing DXD motif
PF02836	2	Glycosyl hydrolases family 2, TIM barrel domain
PF02837	2	Glycosyl hydrolases family 2, sugar binding domain
PF00703	2	Glycosyl hydrolases family 2
PF01532	2	Glycosyl hydrolase family 47
PF05693	2	Glycogen synthase
PF00120	2	Glutamine synthetase, catalytic domain
PF12437	2	Glutamine synthetase type III N terminal
PF13522	2	Glutamine amidotransferase domain
PF03074	2	Glutamate-cysteine ligase
PF13015	2	Glucosidase II beta subunit-like protein
PF07915	2	Glucosidase II beta subunit-like protein
PF07817	2	GLE1-like protein
PF06428	2	GDP/GTP exchange factor Sec2p
PF07842	2	GC-rich sequence DNA-binding factor-like protein
PF04410	2	Gar1/Naf1 RNA binding region
PF13415	2	Galactose oxidase, central domain
PF13418	2	Galactose oxidase, central domain
PF03630	2	Fumble
PF02910	2	Fumarate reductase flavoprotein C-term
PF10415	2	Fumarase C C-terminus
PF01116	2	Fructose-bisphosphate aldolase class-II
PF00551	2	Formyl transferase
PF00250	2	Forkhead domain
PF11817	2	Foie gras liver health family 1
PF09766	2	Fms-interacting protein
PF01070	2	FMN-dependent dehydrogenase
PF01269	2	Fibrillarin
PF00370	2	FGGY family of carbohydrate kinases, N-terminal domain
PF02782	2	FGGY family of carbohydrate kinases, C-terminal domain
PF01846	2	FF domain
PF07664	2	Ferrous iron transport protein B C terminus
PF02421	2	Ferrous iron transport protein B
PF04023	2	FeoA domain
PF00646	2	F-box domain
PF14976	2	FAM72 protein
PF01266	2	FAD dependent oxidoreductase
PF05964	2	F/Y-rich N-terminus
PF03124	2	EXS family
PF07393	2	Exocyst complex component Sec10
PF03081	2	Exo70 exocyst complex subunit
PF01459	2	Eukaryotic porin
PF01652	2	Eukaryotic initiation factor 4E
PF03465	2	eRF1 domain 3
PF03464	2	eRF1 domain 2
PF03463	2	eRF1 domain 1
PF00810	2	ER lumen protein retaining receptor
PF01417	2	ENTH domain
PF00378	2	Enoyl-CoA hydratase/isomerase
PF01042	2	Endoribonuclease L-PSP
PF13850	2	Endoplasmic Reticulum-Golgi Intermediate Compartment (ERGIC)
PF11712	2	Endoplasmic reticulum-based factor for assembly of V-ATPase
PF07970	2	Endoplasmic reticulum vesicle transporter
PF07749	2	Endoplasmic reticulum protein ERp29, C-terminal domain
PF02990	2	Endomembrane protein 70
PF04727	2	ELMO/CED-12 family
PF13805	2	Eisosome component PIL1
PF08356	2	EF hand associated
PF08355	2	EF hand associated
PF02958	2	Ecdysteroid kinase
PF03271	2	EB1-like C-terminal motif
PF04157	2	EAP30/Vps36 family
PF01221	2	Dynein light chain type 1
PF03028	2	Dynein heavy chain and region D6 of dynein motor
PF01031	2	Dynamin central region
PF05160	2	DSS1/SEM1 family
PF08148	2	DSHCT (NUC185) domain
PF01323	2	DSBA-like thioredoxin domain
PF16543	2	DRG Family Regulatory Proteins, Tma46
PF16353	2	Domain of unknown function(DUF4981)
PF05670	2	Domain of unknown function (DUF814)
PF15916	2	Domain of unknown function (DUF4743)
PF12842	2	Domain of unknown function (DUF3819)
PF11997	2	Domain of unknown function (DUF3492)
PF11443	2	Domain of unknown function (DUF2828)
PF09324	2	Domain of unknown function (DUF1981)
PF09234	2	Domain of unknown function (DUF1963)
PF08953	2	Domain of unknown function (DUF1899)
PF08719	2	Domain of unknown function (DUF1768)
PF08354	2	Domain of unknown function (DUF1729)
PF01873	2	Domain found in IF2B/IF5
PF01223	2	DNA/RNA non-specific endonuclease
PF01131	2	DNA topoisomerase
PF04675	2	DNA ligase N terminus
PF04127	2	DNA / pantothenate metabolism flavoprotein
PF16916	2	Dimerisation domain of Zinc Transporter
PF06371	2	Diaphanous GTPase-binding Domain
PF06367	2	Diaphanous FH3 Domain
PF00781	2	Diacylglycerol kinase catalytic domain
PF04511	2	Der1-like family
PF01121	2	Dephospho-CoA kinase
PF02862	2	DDHD domain
PF00793	2	DAHP synthetase I family
PF00883	2	Cytosol aminopeptidase family, catalytic domain
PF01467	2	Cytidylyltransferase-like
PF01053	2	Cys/Met metabolism PLP-dependent enzyme
PF08312	2	cwf21 domain
PF16211	2	C-terminus of histone H2A
PF01544	2	CorA-like Mg2+ transporter protein
PF01218	2	Coproporphyrinogen III oxidase
PF11764	2	COMPASS (Complex proteins associated with Set1p) component N
PF01391	2	Collagen triple helix repeat (20 copies)
PF00313	2	'Cold-shock' DNA-binding domain
PF02861	2	Clp amino terminal domain, pathogenicity island component
PF01393	2	Chromo shadow domain
PF00425	2	chorismate binding enzyme
PF09295	2	ChAPs (Chs5p-Arf1p-binding proteins)
PF06248	2	Centromere/kinetochore Zw10
PF15511	2	Centromere kinetochore component CENP-T histone fold
PF14222	2	Cell morphogenesis N-terminal
PF09079	2	CDC6, C terminal winged helix domain
PF06395	2	CDC24 Calponin
PF16417	2	CCR4-NOT transcription complex subunit 1 TTP binding domain
PF16418	2	CCR4-NOT transcription complex subunit 1 HEAT repeat
PF16415	2	CCR4-NOT transcription complex subunit 1 CAF1-binding domain
PF04054	2	CCR4-Not complex component, Not1
PF01693	2	Caulimovirus viroplasmin
PF03423	2	Carbohydrate binding domain (family 25)
PF02018	2	Carbohydrate binding domain
PF00145	2	C-5 cytosine-specific DNA methylase
PF14260	2	C4-type zinc-finger of DNA polymerase delta
PF00651	2	BTB/POZ domain
PF03909	2	BSD domain
PF07524	2	Bromodomain associated
PF03097	2	BRO1-like domain
PF02929	2	Beta galactosidase small chain
PF02138	2	Beige/BEACH domain
PF05529	2	B-cell receptor-associated protein 31-like
PF07716	2	Basic region leucine zipper
PF16746	2	BAR domain of APPL family
PF01426	2	BAH domain
PF02179	2	BAG domain
PF08840	2	BAAT / Acyl-CoA thioester hydrolase C terminal
PF09333	2	Autophagy-related protein C terminal domain
PF16186	2	Atypical Arm repeat
PF12781	2	ATP-binding dynein motor region D5
PF01068	2	ATP dependent DNA ligase domain
PF04679	2	ATP dependent DNA ligase C terminal region
PF03590	2	Aspartate-ammonia ligase
PF16488	2	Argonaute linker 2 domain
PF08699	2	Argonaute linker 1 domain
PF07651	2	ANTH domain
PF12895	2	Anaphase-promoting complex, cyclosome, subunit 3
PF13597	2	Anaerobic ribonucleoside-triphosphate reductase
PF16558	2	Amino-terminal Zinc-binding domain of ubiquitin ligase E3A
PF13949	2	ALIX V-shaped domain binding to HIV
PF02769	2	AIR synthase related protein, C-terminal domain
PF01808	2	AICARFT/IMPCHase bienzyme
PF00406	2	Adenylate kinase
PF08603	2	Adenylate cyclase associated (CAP) C terminal
PF16076	2	Acyltransferase C-terminus
PF08632	2	Activator of mitotic machinery Cdc14 phosphatase activation C-term
PF01061	2	ABC-2 type transporter
PF08142	2	AARP2CN (NUC121) domain
PF13304	2	AAA domain, putative AbiEii toxin, Type IV TA system
PF07728	2	AAA domain (dynein-related subfamily)
PF13238	2	AAA domain
PF16193	2	AAA C-terminal domain
PF13191	2	AAA ATPase domain
PF01591	2	6-phosphofructo-2-kinase
PF02872	2	5'-nucleotidase, C-terminal domain
PF01648	2	4'-phosphopantetheinyl transferase superfamily
PF04950	2	40S ribosome biogenesis protein Tsr1 and BMS1 C-terminal
PF13510	2	2Fe-2S iron-sulfur cluster binding domain
PF10602	2	26S proteasome subunit RPN7
PF16004	2	116 kDa U5 small nuclear ribonucleoprotein component N-terminus
PF07779	2	10 TM Acyl Transferase domain found in Cas1p
PF03367	1	ZPR1 zinc-finger domain
PF17034	1	Zinc-ribbon like family
PF16503	1	Zinc-ribbon
PF14599	1	Zinc-ribbon
PF15906	1	Zinc-finger of nitric oxide synthase-interacting protein
PF15663	1	Zinc-finger containing family
PF17122	1	Zinc-finger
PF12907	1	Zinc-binding
PF17121	1	Zinc finger, C3HC4 type (RING finger)
PF15801	1	zf-MYND-like zinc finger, mRNA-binding
PF04146	1	YT521-B-like domain
PF08571	1	Yos1-like
PF08265	1	YL1 nuclear protein C-terminal domain
PF03226	1	Yippee zinc-binding/DNA-binding /Mis18, centromere assembly
PF03878	1	YIF1
PF08118	1	Yeast mitochondrial distribution and morphology (MDM) proteins
PF04690	1	YABBY protein
PF00752	1	XPG N-terminal domain
PF09280	1	XPC-binding domain
PF04921	1	XAP5, circadian clock regulator
PF09429	1	WW domain binding protein 11
PF13908	1	Wnt and FGF inhibitory regulator
PF00458	1	WHEP-TRS domain
PF02205	1	WH2 motif
PF00568	1	WH1 domain
PF07676	1	WD40-like Beta Propeller Repeat
PF16529	1	WD40 region of Ge1, enhancer of mRNA-decapping protein
PF07928	1	Vps54-like protein
PF04100	1	Vps53-like, N-terminal
PF04129	1	Vps52 / Sac2 family
PF03997	1	VPS28 protein
PF09454	1	Vps23 core domain
PF04841	1	Vps16, N-terminal region
PF04840	1	Vps16, C-terminal region
PF09446	1	VMA21-like domain
PF10018	1	Vitamin-D-receptor interacting Mediator subunit 4
PF01988	1	VIT family
PF08553	1	VID27 cytoplasmic protein
PF05008	1	Vesicle transport v-SNARE protein N-terminus
PF11704	1	Vesicle coat protein involved in Golgi to plasma membrane transport
PF03224	1	V-ATPase subunit H
PF11698	1	V-ATPase subunit H
PF03223	1	V-ATPase subunit C
PF16909	1	Vacuolar-sorting-associated 13 protein C-terminal
PF10475	1	Vacuolar-sorting protein 54, of GARP complex
PF16908	1	Vacuolar sorting-associated protein 13, N-terminal
PF16854	1	Vacuolar protein sorting-associated protein 53 C-terminus
PF03635	1	Vacuolar protein sorting-associated protein 35
PF03643	1	Vacuolar protein sorting-associated protein 26
PF11605	1	Vacuolar protein sorting protein 36 Vps36
PF12451	1	Vacuolar protein sorting protein 11 C terminal
PF11916	1	Vacuolar protein 14 C-terminal Fig4p binding
PF09783	1	Vacuolar import and degradation protein
PF12755	1	Vacuolar 14 Fab1-binding region
PF03179	1	Vacuolar (H+)-ATPase G subunit
PF06862	1	Utp25, U3 small nucleolar RNA-associated SSU processome protein 25
PF04192	1	Utp21 specific WD40 associated putative domain
PF09384	1	UTP15 C terminal
PF04615	1	Utp14 protein
PF08625	1	Utp13 specific WD40 associated domain
PF03998	1	Utp11 protein
PF08969	1	USP8 dimerisation domain
PF04869	1	Uso1 / p115 like vesicle tethering protein, head region
PF04871	1	Uso1 / p115 like vesicle tethering protein, C terminal region
PF09138	1	Urm1 (Ubiquitin related modifier)
PF10441	1	Urb2/Npa2 family
PF03167	1	Uracil DNA glycosylase superfamily
PF04050	1	Up-frameshift suppressor 2
PF00582	1	Universal stress protein family
PF01205	1	Uncharacterized protein family UPF0029
PF01169	1	Uncharacterized protein family UPF0016
PF00919	1	Uncharacterized protein family UPF0004
PF09995	1	Uncharacterized protein conserved in bacteria (DUF2236)
PF10233	1	Uncharacterized conserved protein CG6151-P
PF10155	1	Uncharacterized conserved protein (DUF2363)
PF10154	1	Uncharacterized conserved protein (DUF2362)
PF10209	1	Uncharacterized conserved protein (DUF2340)
PF09740	1	Uncharacterized conserved protein (DUF2043)
PF10217	1	Uncharacterized conserved protein (DUF2039)
PF01894	1	Uncharacterised protein family UPF0047
PF03676	1	Uncharacterised protein family (UPF0183)
PF03665	1	Uncharacterised protein family (UPF0172)
PF03690	1	Uncharacterised protein family (UPF0160)
PF03669	1	Uncharacterised protein family (UPF0139)
PF03657	1	Uncharacterised protein family (UPF0113)
PF10313	1	Uncharacterised protein domain (DUF2415)
PF10180	1	Uncharacterised conserved protein (DUF2373)
PF09749	1	Uncharacterised conserved protein
PF02594	1	Uncharacterised ACR, YggU family COG1872
PF02582	1	Uncharacterised ACR, YagE family COG1723
PF05216	1	UNC-50 family
PF05743	1	UEV domain
PF06427	1	UDP-glucose:Glycoprotein Glucosyltransferase
PF16550	1	UCH-binding domain
PF16420	1	Ubiquitin-like modifier-activating enzyme ATG7 N-terminus
PF14560	1	Ubiquitin-like domain
PF16455	1	Ubiquitin-binding domain
PF16190	1	Ubiquitin-activating enzyme E1 FCCH domain
PF10585	1	Ubiquitin-activating enzyme active site
PF11976	1	Ubiquitin-2 like Rad60 SUMO-like
PF09358	1	Ubiquitin fold domain
PF10408	1	Ubiquitin elongating factor core
PF13423	1	Ubiquitin carboxyl-terminal hydrolase
PF08587	1	Ubiquitin associated domain (UBA)
PF10596	1	U6-snRNA interacting domain of PrP8
PF10597	1	U5-snRNA binding site 2 of PrP8
PF14617	1	U3-containing 90S pre-ribosomal complex subunit
PF08640	1	U3 small nucleolar RNA-associated protein 6
PF12397	1	U3 small nucleolar RNA-associated protein 10
PF05253	1	U11-48K-like CHHC zinc finger
PF06220	1	U1 zinc finger
PF12220	1	U1 small nuclear ribonucleoprotein of 70kDa MW N terminal
PF06087	1	Tyrosyl-DNA phosphodiesterase
PF04851	1	Type III restriction enzyme, res subunit
PF01487	1	Type I 3-dehydroquinase
PF07569	1	TUP1-like enhancer of split
PF08581	1	Tup N-terminal
PF11470	1	TUG ubiquitin-like domain
PF00567	1	Tudor domain
PF12612	1	Tubulin folding cofactor D C terminal
PF02970	1	Tubulin binding cofactor A
PF01167	1	Tub family
PF13365	1	Trypsin-like peptidase domain
PF04446	1	tRNAHis guanylyltransferase
PF01409	1	tRNA synthetases class II core domain (F)
PF01411	1	tRNA synthetases class II (A)
PF00750	1	tRNA synthetases class I (R)
PF01406	1	tRNA synthetases class I (C) catalytic domain
PF03484	1	tRNA synthetase B5 domain
PF08704	1	tRNA methyltransferase complex GCD14 subunit
PF02778	1	tRNA intron endonuclease, N-terminal domain
PF01974	1	tRNA intron endonuclease, catalytic C-terminal domain
PF05958	1	tRNA (Uracil-5-)-methyltransferase
PF03966	1	Trm112p-like protein
PF12580	1	Tripeptidyl peptidase II
PF00121	1	Triosephosphate isomerase
PF05197	1	TRIC channel
PF01204	1	Trehalase
PF12735	1	TRAPP trafficking subunit Trs65
PF09794	1	Transport protein Avl9
PF05742	1	Transport and Golgi organisation 2
PF14770	1	Transmembrane protein 18
PF11987	1	Translation-initiation factor 2
PF00838	1	Translationally controlled tumour protein
PF12807	1	Translation initiation factor eIF3 subunit 135
PF08597	1	Translation initiation factor eIF3 subunit
PF01841	1	Transglutaminase-like superfamily
PF05010	1	Transforming acidic coiled-coil-containing protein (TACC)
PF02458	1	Transferase family
PF16761	1	Transcription-silencing protein, cryptic loci regulator Clr2
PF04910	1	Transcriptional repressor TCF25
PF02229	1	Transcriptional Coactivator p15 (PC4)
PF14304	1	Transcription termination and cleavage factor C-terminal
PF05236	1	Transcription initiation factor TFIID component TAF4 family
PF03540	1	Transcription initiation factor TFIID 23-30kDa subunit
PF02270	1	Transcription initiation factor IIF, beta subunit
PF02291	1	Transcription initiation factor IID, 31kD subunit
PF02268	1	Transcription initiation factor IIA, gamma subunit, helical domain
PF02751	1	Transcription initiation factor IIA, gamma subunit
PF11262	1	Transcription factor/nuclear export subunit protein 2
PF06331	1	Transcription factor TFIIH complex subunit Tfb5
PF00352	1	Transcription factor TFIID (or TATA-binding protein, TBP)
PF00382	1	Transcription factor TFIIB repeat
PF03850	1	Transcription factor Tfb4
PF03849	1	Transcription factor Tfb2
PF09748	1	Transcription factor subunit Med10 of Mediator complex
PF07500	1	Transcription factor S-II (TFIIS), central domain
PF09341	1	Transcription factor Pcc1
PF08618	1	Transcription factor Opi1
PF08574	1	Transcription factor Iwr1
PF03153	1	Transcription factor IIA, alpha/beta subunit
PF10163	1	Transcription factor e(y)2
PF05129	1	Transcription elongation factor Elf1 like
PF00923	1	Transaldolase/Fructose-6-phosphate aldolase
PF12584	1	Trafficking protein particle complex subunit 10, TRAPPC10
PF03164	1	Trafficking protein Mon1
PF07926	1	TPR/MLP1/MLP2-like protein
PF09770	1	Topoisomerase II-associated protein PAT1
PF04176	1	TIP41-like family
PF04821	1	Timeless protein
PF04280	1	Tim44-like domain
PF00303	1	Thymidylate synthase
PF02223	1	Thymidylate kinase
PF02926	1	THUMP domain
PF12821	1	Threonine/Serine exporter, ThrE
PF14821	1	Threonine synthase N terminus
PF11957	1	THO complex subunit 1 transcription elongation factor
PF01257	1	Thioredoxin-like [2Fe-2S] ferredoxin
PF00108	1	Thiolase, N-terminal domain
PF02803	1	Thiolase, C-terminal domain
PF00975	1	Thioesterase domain
PF04265	1	Thiamin pyrophosphokinase, vitamin B1 binding domain
PF04263	1	Thiamin pyrophosphokinase, catalytic domain
PF14413	1	Thg1 C terminal domain
PF12537	1	The Golgi pH Regulator (GPHR) Family N-terminal
PF04858	1	TH1 protein
PF10419	1	TFIIIC subunit
PF07975	1	TFIIH C1-like domain
PF02186	1	TFIIE beta subunit core domain
PF02002	1	TFIIE alpha subunit
PF08271	1	TFIIB zinc-binding
PF13429	1	Tetratricopeptide repeat
PF13181	1	Tetratricopeptide repeat
PF07719	1	Tetratricopeptide repeat
PF14559	1	Tetratricopeptide repeat
PF00590	1	Tetrapyrrole (Corrin/Porphyrin) Methylases
PF02882	1	Tetrahydrofolate dehydrogenase/cyclohydrolase, NAD(P)-binding domain
PF00763	1	Tetrahydrofolate dehydrogenase/cyclohydrolase, catalytic domain
PF03070	1	TENA/THI-4/PQQC family
PF13019	1	Telomere stability and silencing
PF01300	1	Telomere recombination
PF07202	1	T-complex protein 10 C-terminus
PF08612	1	TATA-binding related factor (TRF) of subunit 20 of Mediator complex
PF08623	1	TATA-binding protein interacting (TIP20)
PF02969	1	TATA box binding protein associated factor (TAF)
PF07106	1	Tat binding protein 1(TBP-1)-interacting protein (TBPIP)
PF04177	1	TAP42-like family
PF03943	1	TAP C-terminal domain
PF07571	1	TAF6 C-terminal HEAT repeat domain
PF14523	1	Syntaxin-like protein
PF09177	1	Syntaxin 6, N-terminal
PF12295	1	Symplekin tight junction protein C terminal
PF12031	1	SWI/SNF-like complex subunit BAF250/Osa
PF08622	1	Svf1-like N-terminal lipocalin domain
PF17187	1	Svf1-like C-terminal lipocalin-like domain
PF06003	1	Survival motor neuron protein (SMN)
PF04935	1	Surfeit locus protein 6
PF01103	1	Surface antigen
PF04143	1	Sulphur transport
PF05631	1	Sugar-tranasporters, 12 TM
PF03083	1	Sugar efflux transporter for intercellular exchange
PF03531	1	Structure-specific recognition protein (SSRP1)
PF08232	1	Striatin family
PF07876	1	Stress responsive A/B Barrel Domain
PF12349	1	Sterol-sensing domain of SREBP cleavage-activation
PF01852	1	START domain
PF16760	1	Starch/carbohydrate-binding module (family 53)
PF00565	1	Staphylococcal nuclease homologue
PF08514	1	STAG domain
PF04056	1	Ssl1-like
PF08492	1	SRP72 RNA-binding domain
PF05022	1	SRP40, C-terminal domain
PF01922	1	SRP19 protein
PF00319	1	SRF-type transcription factor (DNA-binding and dimerisation domain)
PF13249	1	Squalene-hopene cyclase N-terminal domain
PF13243	1	Squalene-hopene cyclase C-terminal domain
PF00494	1	Squalene/phytoene synthase
PF11942	1	Spt5 transcription elongation factor, acidic N-terminal
PF12815	1	Spt5 C-terminal nonapeptide repeat binding Spt4
PF06093	1	Spt4/RpoE2 zinc finger
PF12090	1	Spt20 family
PF08243	1	SPT2 chromatin protein
PF00588	1	SpoU rRNA Methylase family
PF03907	1	Spo7-like protein
PF12108	1	Splicing factor SF3a60 binding domain
PF07189	1	Splicing factor 3B subunit 10 (SF3b10)
PF08920	1	Splicing factor 3B subunit 1
PF16275	1	Splicing factor 1 helix-hairpin domain
PF09759	1	Spinocerebellar ataxia type 10 protein domain
PF08317	1	Spc7 kinetochore protein
PF07780	1	Spb1 C-terminal domain
PF02586	1	SOS response associated peptidase (SRAP)
PF08628	1	Sorting nexin C terminal
PF14738	1	Solute carrier (proton/amino acid symporter), TRAMD3 or PAT1
PF04158	1	Sof1-like domain
PF01235	1	Sodium:alanine symporter family
PF06682	1	SOCE-associated regulatory factor of calcium homoeostasis
PF07366	1	SnoaL-like polyketide cyclase
PF14619	1	Snf2-ATP coupling, chromatin remodelling complex
PF10496	1	SNARE-complex protein Syntaxin-18 N-terminus
PF03467	1	Smg-4/UPF3 family
PF06470	1	SMC proteins Flexible Hinge Domain
PF11779	1	Small subunit of serine palmitoyltransferase-like
PF10369	1	Small subunit of acetolactate synthase
PF15477	1	Small acidic protein family
PF05462	1	Slime mold cyclic AMP receptor
PF09111	1	SLIDE
PF10531	1	SLBB domain
PF02731	1	SKIP/SNW domain
PF06677	1	Sjogren's syndrome/scleroderma autoantigen 1 (Autoantigen p27)
PF01380	1	SIS domain
PF04801	1	Sin-like protein conserved region
PF06487	1	Sin3 associated polypeptide p18 (SAP18)
PF05769	1	SIKE family
PF04086	1	Signal recognition particle, alpha subunit, N-terminal
PF09439	1	Signal recognition particle receptor beta subunit
PF05486	1	Signal recognition particle 9 kDa protein (SRP9)
PF02290	1	Signal recognition particle 14kD protein
PF04258	1	Signal peptide peptidase
PF02978	1	Signal peptide binding domain
PF01172	1	Shwachman-Bodian-Diamond syndrome (SBDS) protein
PF04925	1	SHQ1 protein
PF01202	1	Shikimate kinase
PF08501	1	Shikimate dehydrogenase substrate binding domain
PF01488	1	Shikimate / quinate 5-dehydrogenase
PF04908	1	SH3-binding, glutamic acid-rich protein
PF14633	1	SH2 domain
PF07093	1	SGT1 protein
PF05002	1	SGS domain
PF07039	1	SGF29 tudor-like domain
PF02403	1	Seryl-tRNA synthetase N-terminal domain
PF03348	1	Serine incorporator (Serinc)
PF08059	1	SEP domain
PF02774	1	Semialdehyde dehydrogenase, dimerisation domain
PF00344	1	SecY translocase
PF08314	1	Secretory pathway protein Sec39
PF00584	1	SecE/Sec61-gamma subunits of protein translocation complex
PF02810	1	SEC-C motif
PF04048	1	Sec8 exocyst complex component specific domain
PF03911	1	Sec61beta family
PF04136	1	Sec34-like family
PF03908	1	Sec20
PF08598	1	Sds3-like
PF05285	1	SDA1
PF02036	1	SCP-2 sterol transfer family
PF12701	1	Scd6-like Sm domain
PF05652	1	Scavenger mRNA decapping enzyme (DcpS) N-terminal
PF08712	1	Scaffold protein Nfu/NifU N terminal
PF08313	1	SCA7, zinc-binding domain
PF09377	1	SBDS protein C-terminal domain
PF09368	1	Sas10 C-terminal domain
PF03343	1	SART-1 family
PF16979	1	SAPK-interacting protein 1 (Sin1), Pleckstrin-homology
PF16282	1	SANT/Myb-like domain of DAMP1
PF01259	1	SAICAR synthetase
PF00670	1	S-adenosyl-L-homocysteine hydrolase, NAD binding domain
PF05221	1	S-adenosyl-L-homocysteine hydrolase
PF03435	1	Saccharopine dehydrogenase NADP binding domain
PF16653	1	Saccharopine dehydrogenase C-terminal domain
PF03297	1	S25 ribosomal protein
PF17215	1	S1 domain
PF08595	1	RXT2-like, N-terminal
PF02759	1	RUN domain
PF02915	1	Rubrerythrin
PF09273	1	Rubisco LSMT substrate-binding
PF04181	1	Rtr1/RPAP2 family
PF08600	1	Rsm1-like
PF08071	1	RS4NT (NUC023) domain
PF07890	1	Rrp15p
PF10153	1	rRNA-processing protein Efg1
PF06102	1	rRNA biogenesis protein RRP36
PF09382	1	RQC domain
PF01900	1	Rpp14/Pop5 family
PF08621	1	RPAP1-like, N-terminal
PF08620	1	RPAP1-like, C-terminal
PF10493	1	Rough deal protein C-terminal region
PF10259	1	Rogdi leucine zipper containing protein
PF03259	1	Roadblock/LC7 domain
PF01876	1	RNase P subunit p30
PF04032	1	RNAse P Rpr2/Rpp21/SNM1 subunit domain
PF00075	1	RNase H
PF16969	1	RNA-binding signal recognition particle 68
PF10598	1	RNA recognition motif of the spliceosomal PrP8
PF04059	1	RNA recognition motif 2
PF03870	1	RNA polymerase Rpb8
PF01192	1	RNA polymerase Rpb6
PF03871	1	RNA polymerase Rpb5, N-terminal domain
PF01191	1	RNA polymerase Rpb5, C-terminal domain
PF03874	1	RNA polymerase Rpb4
PF09734	1	RNA polymerase III transcription factor (TF)IIIC subunit
PF08221	1	RNA polymerase III subunit RPC82 helix-turn-helix domain
PF05645	1	RNA polymerase III subunit RPC82
PF08292	1	RNA polymerase III subunit Rpc25
PF05132	1	RNA polymerase III RPC4
PF06881	1	RNA polymerase II transcription factor SIII (Elongin) subunit A
PF09816	1	RNA polymerase II transcription elongation factor
PF10255	1	RNA polymerase I-associated factor PAF67
PF06883	1	RNA polymerase I, Rpa2 specific domain
PF05327	1	RNA polymerase I specific transcription initiation factor RRN3
PF10347	1	RNA pol II promoter Fmp27 protein domain
PF10359	1	RNA pol II promoter Fmp27 protein domain
PF05179	1	RNA pol II accessory factor, Cdc73 family, C-terminal
PF09416	1	RNA helicase (UPF2 interacting domain)
PF09445	1	RNA cap guanine-N2 methyltransferase
PF01885	1	RNA 2'-phosphotransferase, Tpt1 / KptA family
PF04321	1	RmlD substrate binding domain
PF12333	1	Rix1 complex component involved in 60S ribosome maturation
PF09202	1	Rio2, N-terminal
PF04437	1	RINT-1 / TIP-1 family
PF17123	1	RING-like zinc finger
PF13229	1	Right handed beta helix region
PF07064	1	RIC1
PF00834	1	Ribulose-phosphate 3 epimerase family
PF16717	1	Ribosome-associated complex head domain
PF04939	1	Ribosome biogenesis regulatory protein (RRS1)
PF04034	1	Ribosome biogenesis protein, C-terminal
PF15341	1	Ribosome biogenesis protein SLX9
PF09420	1	Ribosome biogenesis protein Nop16
PF16205	1	Ribosomal_S17 N-terminal
PF01015	1	Ribosomal S3Ae family
PF00833	1	Ribosomal S17
PF12923	1	Ribosomal RNA-processing protein 7 (RRP7)
PF00398	1	Ribosomal RNA adenine dimethylase
PF16906	1	Ribosomal proteins L26 eukaryotic, L24P archaeal
PF00181	1	Ribosomal Proteins L2, RNA binding domain
PF03947	1	Ribosomal Proteins L2, C-terminal domain
PF01775	1	Ribosomal proteins 50S-L18Ae/60S-L20/60S-L18A
PF00828	1	Ribosomal proteins 50S-L15, 50S-L18e, 60S-L27A
PF00410	1	Ribosomal protein S8
PF00177	1	Ribosomal protein S7p/S5e
PF01092	1	Ribosomal protein S6e
PF00163	1	Ribosomal protein S4/S9 N-terminal domain
PF00189	1	Ribosomal protein S3, C-terminal domain
PF01599	1	Ribosomal protein S27a
PF01283	1	Ribosomal protein S26e
PF01282	1	Ribosomal protein S24e
PF01249	1	Ribosomal protein S21e
PF00203	1	Ribosomal protein S19
PF00366	1	Ribosomal protein S17
PF00416	1	Ribosomal protein S13/S18
PF00164	1	Ribosomal protein S12/S23
PF00411	1	Ribosomal protein S11
PF00338	1	Ribosomal protein S10p/S20e
PF01159	1	Ribosomal protein L6e
PF03868	1	Ribosomal protein L6, N-terminal domain
PF00935	1	Ribosomal protein L44
PF00573	1	Ribosomal protein L4/L1 family
PF01158	1	Ribosomal protein L36e
PF01247	1	Ribosomal protein L35Ae
PF01199	1	Ribosomal protein L34e
PF01198	1	Ribosomal protein L31e
PF00297	1	Ribosomal protein L3
PF03939	1	Ribosomal protein L23, N-terminal domain
PF00276	1	Ribosomal protein L23
PF00237	1	Ribosomal protein L22p/L17e
PF01157	1	Ribosomal protein L21e
PF01280	1	Ribosomal protein L19e
PF00252	1	Ribosomal protein L16p/L10e
PF00238	1	Ribosomal protein L14p/L23e
PF01929	1	Ribosomal protein L14
PF01294	1	Ribosomal protein L13e
PF00298	1	Ribosomal protein L11, RNA binding domain
PF03946	1	Ribosomal protein L11, N-terminal domain
PF17135	1	Ribosomal protein 60S L18 and 50S L18e
PF17144	1	Ribosomal large subunit proteins 60S L5, and 50S L18
PF00673	1	ribosomal L5P family C-terminus
PF01020	1	Ribosomal L40e family
PF01781	1	Ribosomal L38e protein family
PF00831	1	Ribosomal L29 protein
PF01777	1	Ribosomal L27e protein family
PF01776	1	Ribosomal L22e protein family
PF14204	1	Ribosomal L18 C-terminal region
PF00900	1	Ribosomal family S4e
PF02502	1	Ribose/Galactose Isomerase
PF04597	1	Ribophorin I
PF06978	1	Ribonucleases P/MRP protein subunit POP1
PF08584	1	Ribonuclease P 40kDa (Rpp40) subunit
PF00636	1	Ribonuclease III domain
PF01351	1	Ribonuclease HII
PF06479	1	Ribonuclease 2-5A
PF01687	1	Riboflavin kinase
PF02115	1	RHO protein GDP dissociation inhibitor
PF08737	1	Rgp1
PF01512	1	Respiratory-chain NADH dehydrogenase 51 Kd subunit
PF00239	1	Resolvase, N terminal domain
PF10363	1	Required for nuclear transport of RNA pol II C-terminus 1
PF16900	1	Replication protein A OB domain
PF14768	1	Replication protein A interacting C-terminal
PF08784	1	Replication protein A C terminal
PF04057	1	Replication factor-A protein 1, N-terminal domain
PF08646	1	Replication factor-A C terminal domain
PF08661	1	Replication factor A protein 3
PF16910	1	Repeating coiled region of VPS13
PF13517	1	Repeat domain in Vibrio, Colwellia, Bradyrhizobium and Shewanella
PF02197	1	Regulatory subunit of type II PKA R-subunit
PF03398	1	Regulator of Vps4 activity in the MVB pathway
PF16770	1	Regulator of Ty1 transposition protein 107 BRCT domain
PF08534	1	Redoxin
PF07808	1	RED-like protein N-terminal region
PF07807	1	RED-like protein C-terminal region
PF07508	1	Recombinase
PF10247	1	Reactive mitochondrial oxygen species modulator 1
PF12234	1	RAVE protein 1 C terminal
PF06047	1	Ras-induced vulval development antagonist
PF03836	1	RasGAP C-terminus
PF14538	1	Raptor N-terminal CASPase like domain
PF14664	1	Rapamycin-insensitive companion of mTOR, N-term
PF14666	1	Rapamycin-insensitive companion of mTOR, middle domain
PF14668	1	Rapamycin-insensitive companion of mTOR, domain 5
PF14663	1	Rapamycin-insensitive companion of mTOR RasGEF_N domain
PF04603	1	Ran-interacting Mog1 protein
PF05508	1	RanGTP-binding protein
PF10428	1	RAM signalling pathway protein
PF16672	1	Ragulator complex protein LAMTOR5
PF05691	1	Raffinose synthase or seed imbibition protein Sip1
PF16199	1	Radical_SAM C-terminal domain
PF06098	1	Radial spoke protein 3
PF08658	1	Rad54 N terminal
PF11464	1	Rabenosyn Rab binding domain
PF07019	1	Rab5-interacting protein (Rab5ip)
PF14655	1	Rab3 GTPase-activating protein regulatory subunit N-terminus
PF14656	1	Rab3 GTPase-activating protein regulatory subunit C-terminus
PF13890	1	Rab3 GTPase-activating protein catalytic subunit
PF13902	1	R3H-associated N-terminal domain
PF01424	1	R3H domain
PF04484	1	QWRF family
PF01729	1	Quinolinate phosphoribosyl transferase, C-terminal domain
PF08880	1	QLQ
PF17147	1	Pyruvate:ferredoxin oxidoreductase core domain II
PF01326	1	Pyruvate phosphate dikinase, PEP/pyruvate binding domain
PF01855	1	Pyruvate flavodoxin/ferredoxin oxidoreductase, thiamine diP-bdg
PF01558	1	Pyruvate ferredoxin/flavodoxin oxidoreductase
PF14748	1	Pyrroline-5-carboxylate reductase dimerisation
PF02784	1	Pyridoxal-dependent decarboxylase, pyridoxal binding domain
PF00282	1	Pyridoxal-dependent decarboxylase conserved domain
PF02852	1	Pyridine nucleotide-disulphide oxidoreductase, dimerisation domain
PF02194	1	PXA domain
PF00855	1	PWWP domain
PF06221	1	Putative zinc finger motif, C2HC5-type
PF02207	1	Putative zinc finger in N-recognin (UBR box)
PF01255	1	Putative undecaprenyl diphosphate synthase
PF10639	1	Putative transmembrane family 234
PF17004	1	Putative TPR-like repeat
PF11312	1	Putative SAM-dependent methyltransferase
PF02598	1	Putative RNA methyltransferase
PF12044	1	Putative peptidase family
PF02390	1	Putative methyltransferase
PF02659	1	Putative manganese efflux pump
PF03481	1	Putative GTP-binding controlling metal-binding
PF06775	1	Putative adipose-regulatory protein (Seipin)
PF00809	1	Pterin binding enzyme
PF12134	1	PRP8 domain IV core
PF09785	1	Prp31 C terminal domain
PF08606	1	Prp19/Pso4-like
PF02840	1	Prp18 domain
PF06424	1	PRP1 splicing factor, N-terminal
PF01679	1	Proteolipid membrane potential modulator
PF04387	1	Protein tyrosine phosphatase-like protein, PTPLA
PF12070	1	Protein SCAI
PF04979	1	Protein phosphatase inhibitor 2 (IPP-2)
PF01603	1	Protein phosphatase 2A regulatory B subunit (B56 family)
PF03314	1	Protein of unknown function, DUF273
PF06197	1	Protein of unknown function (DUF998)
PF06159	1	Protein of unknown function (DUF974)
PF06071	1	Protein of unknown function (DUF933)
PF05620	1	Protein of unknown function (DUF788)
PF05603	1	Protein of unknown function (DUF775)
PF05303	1	Protein of unknown function (DUF727)
PF05018	1	Protein of unknown function (DUF667)
PF04574	1	Protein of unknown function (DUF592)
PF04474	1	Protein of unknown function (DUF554)
PF04190	1	Protein of unknown function (DUF410)
PF10300	1	Protein of unknown function (DUF3808)
PF12572	1	Protein of unknown function (DUF3752)
PF12396	1	Protein of unknown function (DUF3659)
PF12239	1	Protein of unknown function (DUF3605)
PF12157	1	Protein of unknown function (DUF3591)
PF09495	1	Protein of unknown function (DUF2462)
PF10338	1	Protein of unknown function (DUF2423)
PF09431	1	Protein of unknown function (DUF2013)
PF09430	1	Protein of unknown function (DUF2012)
PF09418	1	Protein of unknown function (DUF2009)
PF08648	1	Protein of unknown function (DUF1777)
PF08588	1	Protein of unknown function (DUF1769)
PF07946	1	Protein of unknown function (DUF1682)
PF07933	1	Protein of unknown function (DUF1681)
PF07853	1	Protein of unknown function (DUF1648)
PF07774	1	Protein of unknown function (DUF1620)
PF07713	1	Protein of unknown function (DUF1604)
PF06912	1	Protein of unknown function (DUF1275)
PF06842	1	Protein of unknown function (DUF1242)
PF06658	1	Protein of unknown function (DUF1168)
PF16507	1	Proteasome-substrate-size regulator, mid region
PF13001	1	Proteasome stabiliser
PF08375	1	Proteasome regulatory subunit C-terminal
PF10508	1	Proteasome non-ATPase 26S subunit
PF05348	1	Proteasome maturation factor UMP1
PF04683	1	Proteasome complex subunit Rpn13 ubiquitin receptor
PF12465	1	Proteasome beta subunits C terminal
PF16094	1	Proteasome assembly chaperone 4
PF02252	1	Proteasome activator pa28 beta subunit
PF02251	1	Proteasome activator pa28 alpha subunit
PF01483	1	Proprotein convertase P-domain
PF09180	1	Prolyl-tRNA synthetase, C-terminal
PF02897	1	Prolyl oligopeptidase, N-terminal beta-propeller domain
PF15365	1	Proline-rich nuclear receptor coactivator motif
PF00705	1	Proliferating cell nuclear antigen, N-terminal domain
PF02747	1	Proliferating cell nuclear antigen, C-terminal domain
PF00235	1	Profilin
PF08084	1	PROCT (NUC072) domain
PF08083	1	PROCN (NUC071) domain
PF10237	1	Probable N6-adenine methyltransferase
PF00994	1	Probable molybdopterin binding domain
PF08082	1	PRO8NT (NUC069), PrP8 N-terminal domain
PF17285	1	PRMT5 TIM barrel domain
PF17286	1	PRMT5 oligomerisation domain
PF05185	1	PRMT5 arginine-N-methyltransferase
PF05033	1	Pre-SET motif
PF10273	1	Pre-rRNA-processing protein TSR2
PF09802	1	Preprotein translocase subunit Sec66
PF02153	1	Prephenate dehydrogenase
PF00800	1	Prephenate dehydratase
PF16837	1	Pre-mRNA-splicing factor SF3A3, of SF3a complex, Prp9
PF16835	1	Pre-mRNA-splicing factor SF3a complex subunit 2 (Prp11)
PF09736	1	Pre-mRNA-splicing factor of RES complex
PF11708	1	Pre-mRNA splicing Prp18-interacting factor
PF12230	1	Pre-mRNA splicing factor PRP21 like protein
PF11831	1	pre-mRNA splicing factor component
PF12542	1	Pre-mRNA splicing factor
PF08572	1	pre-mRNA processing factor 3 (PRP3)
PF06807	1	Pre-mRNA cleavage complex II protein Clp1
PF11718	1	Pre-mRNA 3'-end-processing endonuclease polyadenylation factor C-term
PF10101	1	Predicted membrane protein (DUF2339)
PF09997	1	Predicted membrane protein (DUF2238)
PF10058	1	Predicted integral membrane zinc-ribbon metal-binding protein
PF03208	1	PRA1 family protein
PF01011	1	PQQ enzyme repeat
PF05903	1	PPPDE putative peptidase domain
PF08321	1	PPP5 TPR repeat region
PF09184	1	PPP4R2
PF00639	1	PPIC-type PPIASE domain
PF13616	1	PPIC-type PPIASE domain
PF10343	1	Potential Queuosine, Q, salvage protein family
PF13725	1	Possible tRNA binding domain
PF08170	1	POPLD (NUC188) domain
PF04669	1	Polysaccharide biosynthesis
PF08645	1	Polynucleotide kinase 3 phosphatase
PF00645	1	Poly(ADP-ribose) polymerase and DNA-Ligase Zn-finger region
PF04926	1	Poly(A) polymerase predicted RNA binding domain
PF04928	1	Poly(A) polymerase central domain
PF00659	1	POLO box duplicated region
PF17292	1	POB3-like N-terminal PH domain
PF08066	1	PMC2NT (NUC016) domain
PF03126	1	Plus-3 domain
PF10559	1	Plug domain of Sec61p
PF12775	1	P-loop containing dynein motor region D3
PF16457	1	Pleckstrin homology domain
PF15409	1	Pleckstrin homology domain
PF15410	1	Pleckstrin homology domain
PF13091	1	PLD-like domain
PF06201	1	PITH domain
PF04696	1	pinin/SDK/memA/ protein conserved region
PF17146	1	PIN domain of ribonuclease
PF08510	1	PIG-P
PF08288	1	PIGA (GPI anchor biosynthesis)
PF05970	1	PIF1-like helicase
PF11566	1	PI31 proteasome regulator N-terminal
PF08577	1	PI31 proteasome regulator
PF05023	1	Phytochelatin synthase
PF02811	1	PHP domain
PF01636	1	Phosphotransferase enzyme family
PF02844	1	Phosphoribosylglycinamide synthetase, N domain
PF02843	1	Phosphoribosylglycinamide synthetase, C domain
PF01071	1	Phosphoribosylglycinamide synthetase, ATP-grasp (A) domain
PF01503	1	Phosphoribosyl-ATP pyrophosphohydrolase
PF01502	1	Phosphoribosyl-AMP cyclohydrolase
PF02230	1	Phospholipase/Carboxylesterase
PF00792	1	Phosphoinositide 3-kinase C2
PF00342	1	Phosphoglucose isomerase
PF01507	1	Phosphoadenosine phosphosulfate reductase family
PF00387	1	Phosphatidylinositol-specific phospholipase C, Y domain
PF10510	1	Phosphatidylinositol-glycan biosynthesis class S protein
PF06432	1	Phosphatidylinositol N-acetylglucosaminyltransferase
PF01161	1	Phosphatidylethanolamine-binding protein
PF03034	1	Phosphatidyl serine synthase
PF01384	1	Phosphate transporter family
PF09423	1	PhoD-like phosphatase
PF14299	1	Phloem protein 2
PF03660	1	PHF5-like protein
PF02567	1	Phenazine biosynthesis-like protein
PF13771	1	PHD-like zinc-binding domain
PF14844	1	PH domain associated with Beige/BEACH
PF14593	1	PH domain
PF07819	1	PGAP1-like protein
PF04614	1	Pex19 protein family
PF06732	1	Pescadillo N-terminus
PF09262	1	Peroxisome biogenesis factor 1, N-terminal
PF08610	1	Peroxisomal membrane protein (Pex16)
PF04088	1	Peroxin 13, N-terminal region
PF00860	1	Permease family
PF07054	1	Pericardin like repeat
PF04080	1	Per1-like family
PF00391	1	PEP-utilising enzyme, mobile domain
PF01981	1	Peptidyl-tRNA hydrolase PTH2
PF16470	1	Peptidase S8 pro-domain
PF04450	1	Peptidase of plants and bacteria
PF13398	1	Peptidase M50B-like
PF08367	1	Peptidase M16C associated
PF08291	1	Peptidase M15
PF01343	1	Peptidase family S49
PF02163	1	Peptidase family M50
PF04389	1	Peptidase family M28
PF03416	1	Peptidase family C54
PF03568	1	Peptidase family C50
PF07687	1	Peptidase dimerisation domain
PF10275	1	Peptidase C65 Otubain
PF13812	1	Pentatricopeptide repeat domain
PF03211	1	Pectate lyase
PF05625	1	PAXNEB protein
PF01734	1	Patatin-like phospholipase
PF04795	1	PAPA-1-like conserved region
PF14360	1	PAP2 superfamily C-terminal
PF14378	1	PAP2 superfamily
PF02569	1	Pantoate-beta-alanine ligase
PF03656	1	Pam16
PF02089	1	Palmitoyl protein thioesterase
PF16050	1	Paf1 complex subunit CDC73 N-terminal
PF03985	1	Paf1
PF09754	1	PAC2 family
PF12409	1	P5-type ATPase cation transporter
PF13862	1	p21-C-terminal region-binding protein
PF04756	1	OST3 / OST6 family, transporter family
PF00215	1	Orotidine 5'-phosphate decarboxylase / HUMPS family
PF02100	1	Ornithine decarboxylase antizyme
PF04061	1	ORMDL family
PF14630	1	Origin recognition complex (ORC) subunit 5 C-terminus
PF14629	1	Origin recognition complex (ORC) subunit 4 C-terminus
PF07034	1	Origin recognition complex (ORC) subunit 3 N-terminus
PF05817	1	Oligosaccharyltransferase subunit Ribophorin II
PF05251	1	Oligosaccharyltransferase subunit 5
PF03345	1	Oligosaccharyltransferase 48 kDa subunit beta
PF02516	1	Oligosaccharyl transferase STT3 subunit
PF08660	1	Oligosaccharide biosynthesis protein Alg14 like
PF07575	1	Nup85 Nucleoporin
PF08911	1	NUP50 (Nucleoporin 50 kDa)
PF08801	1	Nup133 N terminal like
PF03800	1	Nuf2 family
PF04880	1	NUDE protein, C-terminal conserved region
PF13869	1	Nucleotide hydrolase
PF08609	1	Nucleotide exchange factor Fes1
PF01733	1	Nucleoside transporter
PF10487	1	Nucleoporin subcomplex protein binding to Pom34
PF09531	1	Nucleoporin protein Ndc1-Nup
PF15967	1	Nucleoporin FG repeated region
PF13874	1	Nucleoporin complex subunit 54
PF04135	1	Nucleolar RNA-binding protein, Nop10p family
PF09805	1	Nucleolar protein 12 (25kDa)
PF16201	1	Nucleolar pre-ribosomal-associated protein 1
PF06858	1	Nucleolar GTP-binding protein 1 (NOG1)
PF07540	1	Nucleolar complex-associated protein
PF10500	1	Nuclear RNA-splicing-associated protein
PF09751	1	Nuclear protein Es2
PF04121	1	Nuclear pore protein 84 / 107
PF10168	1	Nuclear pore component
PF13934	1	Nuclear pore complex assembly
PF12719	1	Nuclear condensing complex subunits, C-term domain
PF08161	1	NUC173 domain
PF13452	1	N-terminal half of MaoC dehydratase
PF16884	1	N-terminal domain of oxidoreductase
PF17125	1	N-terminal domain of 16S rRNA methyltransferase RsmF
PF14699	1	N-terminal domain from the human glycogen debranching enzyme
PF10358	1	N-terminal C2 in EEIG1 and EHBP1 proteins
PF05064	1	Nsp1-like C-terminal region
PF08743	1	Nse4 C-terminal
PF07574	1	Nse1 non-SMC component of SMC5-6 complex
PF08424	1	NRDE-2, necessary for RNA interference
PF17403	1	Nrap protein PAP/OAS-like domain
PF17406	1	Nrap protein PAP/OAS1-like domain 5
PF17405	1	Nrap protein nucleotidyltransferase domain 4
PF17407	1	Nrap protein domain 6
PF17404	1	Nrap protein domain 3
PF03813	1	Nrap protein domain 1
PF05020	1	NPL4 family, putative zinc binding region
PF05021	1	NPL4 family
PF04065	1	Not1 N-terminal domain, CCR4-Not complex component
PF07767	1	Nop53 (60S ribosomal biogenesis)
PF12922	1	non-SMC mitotic condensation complex subunit 1, N-term
PF08155	1	NOGCT (NUC087) domain
PF03715	1	Noc2p family
PF03980	1	Nnf1
PF12569	1	NMDA receptor-regulated protein 1
PF00877	1	NlpC/P60 family
PF03666	1	Nitrogen Permease regulator of amino acid transport activity 3
PF06218	1	Nitrogen permease regulator 2
PF15458	1	Nineteen complex-related protein 2
PF08772	1	Nin one binding (NOB1) Zn-ribbon like
PF01592	1	NifU-like N terminal domain
PF01106	1	NifU-like domain
PF01784	1	NIF3 (NGG1p interacting factor 3)
PF08153	1	NGP1NT (NUC091) domain
PF04734	1	Neutral/alkaline non-lysosomal ceramidase, N-terminal
PF17048	1	Neutral/alkaline non-lysosomal ceramidase, C-terminal
PF07492	1	Neutral trehalase Ca2+ binding domain
PF15492	1	Neuroblastoma-amplified sequence, N terminal
PF03807	1	NADP oxidoreductase coenzyme F420-dependent
PF10589	1	NADH-ubiquinone oxidoreductase-F iron-sulfur binding region
PF09296	1	NADH pyrophosphatase-like rudimentary NUDIX domain
PF01210	1	NAD-dependent glycerol-3-phosphate dehydrogenase N-terminus
PF07479	1	NAD-dependent glycerol-3-phosphate dehydrogenase C-terminus
PF02540	1	NAD synthase
PF09797	1	N-acetyltransferase B complex (NatB) non catalytic subunit
PF05024	1	N-acetylglucosaminyl transferase component (Gpi1)
PF07942	1	N2227-like protein
PF02005	1	N2,N2-dimethylguanosine tRNA methyltransferase
PF07923	1	N1221-like protein
PF00697	1	N-(5'phosphoribosyl)anthranilate (PRA) isomerase
PF04825	1	N terminus of Rad21 / Rec8 like protein
PF01233	1	Myristoyl-CoA:protein N-myristoyltransferase, N-terminal domain
PF02799	1	Myristoyl-CoA:protein N-myristoyltransferase, C-terminal domain
PF06602	1	Myotubularin-like phosphatase domain
PF11701	1	Myosin-binding striated muscle assembly central
PF08676	1	MutL C terminal dimerisation domain
PF06588	1	Muskelin N-terminus
PF08245	1	Mur ligase middle domain
PF10291	1	Muniscin C-terminal mu homology domain
PF08523	1	Multiprotein bridging factor 1
PF04421	1	Mss4 protein
PF16741	1	mRNA-decapping enzyme C-terminus
PF03919	1	mRNA capping enzyme, C-terminal domain
PF01331	1	mRNA capping enzyme, catalytic domain
PF02940	1	mRNA capping enzyme, beta chain
PF03291	1	mRNA capping enzyme
PF04152	1	Mre11 DNA-binding presumed domain
PF09444	1	MRC1-like domain
PF04117	1	Mpv17 / PMP22 family
PF04006	1	Mpp10 protein
PF07200	1	Modifier of rudimentary (Mod(r)) protein
PF08569	1	Mo25-like
PF02221	1	ML domain
PF10253	1	Mitotic checkpoint regulator, MAD2B-interacting
PF14724	1	Mitochondrial-associated sphingomyelin phosphodiesterase
PF09139	1	Mitochondrial matrix Mmp37
PF04281	1	Mitochondrial import receptor subunit Tom22
PF15044	1	Mitochondrial function, CLU-N-term
PF12519	1	Mitochondrial distribution and morphology protein 10
PF01987	1	Mitochondrial biogenesis AIM24
PF04627	1	Mitochondrial ATP synthase epsilon chain
PF08202	1	Mis12-Mtw1 protein family
PF05859	1	Mis12 protein
PF09739	1	Mini-chromosome maintenance replisome factor
PF12619	1	Mini-chromosome maintenance protein 2
PF12341	1	Minichromosome loss protein, Mcl1, middle region
PF04424	1	MINDY deubiquitinase
PF09088	1	MIF4G like
PF09090	1	MIF4G like
PF11699	1	Mif2/CENP-C like
PF16187	1	Middle or third domain of peptidase_M16
PF10235	1	Microtubule-associated protein CRIPT
PF03999	1	Microtubule associated protein (MAP65/ASE1 family)
PF06703	1	Microsomal signal peptidase 25 kDa subunit (SPC25)
PF06645	1	Microsomal signal peptidase 12 kDa subunit (SPC12)
PF06991	1	Microfibril-associated/Pre-mRNA processing
PF05206	1	Methyltransferase TRM13
PF12589	1	Methyltransferase involved in Williams-Beuren syndrome
PF02219	1	Methylenetetrahydrofolate reductase
PF03352	1	Methyladenine glycosylase
[truncated: 680 more rows]

## Sheet: Neofr
#Family	Protein_count	Pfam description	10629
PF02013	400	Cellulose or protein binding domain
PF12796	309	Ankyrin repeats (3 copies)
PF00069	246	Protein kinase domain
PF00187	170	Chitin recognition protein
PF08757	166	CotH kinase protein
PF00076	122	RNA recognition motif. (a.k.a. RRM, RBD, or RNP domain)
PF00005	96	ABC transporter
PF00734	86	Fungal cellulose binding domain
PF13855	80	Leucine rich repeat
PF00400	80	WD domain, G-beta repeat
PF13637	73	Ankyrin repeats (many copies)
PF00018	62	SH3 domain
PF01522	53	Polysaccharide deacetylase
PF00271	52	Helicase conserved C-terminal domain
PF14604	52	Variant SH3 domain
PF00083	49	Sugar (and other) transporter
PF02011	48	Glycosyl hydrolase family 48
PF00168	48	C2 domain
PF01341	46	Glycosyl hydrolases family 6
PF00457	43	Glycosyl hydrolases family 11
PF00270	42	DEAD/DEAH box helicase
PF00004	42	ATPase family associated with various cellular activities (AAA)
PF00226	40	DnaJ domain
PF14200	40	Ricin-type beta-trefoil lectin domain-like
PF12698	39	ABC-2 family transporter protein
PF00331	38	Glycosyl hydrolase family 10
PF00071	36	Ras family
PF00082	35	Subtilase family
PF04616	34	Glycosyl hydrolases family 43
PF00501	34	AMP-binding enzyme
PF00149	34	Calcineurin-like phosphoesterase
PF00620	33	RhoGAP domain
PF00085	33	Thioredoxin
PF00012	31	Hsp70 protein
PF00150	31	Cellulase (glycosyl hydrolase family 5)
PF00169	30	PH domain
PF08238	29	Sel1 repeat
PF00665	29	Integrase core domain
PF00179	28	Ubiquitin-conjugating enzyme
PF00664	28	ABC transporter transmembrane region
PF03142	28	Chitin synthase
PF00109	28	Beta-ketoacyl synthase, N-terminal domain
PF00561	28	alpha/beta hydrolase fold
PF00621	27	RhoGEF domain
PF02901	27	Pyruvate formate lyase-like
PF02801	26	Beta-ketoacyl synthase, C-terminal domain
PF00078	26	Reverse transcriptase (RNA-dependent DNA polymerase)
PF03028	26	Dynein heavy chain and region D6 of dynein motor
PF13499	25	EF-hand domain pair
PF13246	25	Cation transport ATPase (P-type)
PF00232	24	Glycosyl hydrolase family 1
PF00240	24	Ubiquitin family
PF00481	24	Protein phosphatase 2C
PF13639	23	Ring finger domain
PF00248	23	Aldo/keto reductase family
PF02015	23	Glycosyl hydrolase family 45
PF00153	23	Mitochondrial carrier protein
PF00566	22	Rab-GTPase-TBC domain
PF00155	22	Aminotransferase class I and II
PF00135	22	Carboxylesterase family
PF00505	21	HMG (high mobility group) box
PF07534	21	TLD
PF01602	21	Adaptin N terminal region
PF13606	21	Ankyrin repeat
PF07690	20	Major Facilitator Superfamily
PF12777	20	Microtubule-binding stalk of dynein motor
PF00227	20	Proteasome subunit
PF00011	20	Hsp20/alpha crystallin family
PF13472	20	GDSL-like Lipase/Acylhydrolase family
PF01399	20	PCI domain
PF00412	19	LIM domain
PF00063	19	Myosin head (motor domain)
PF00118	19	TCP-1/cpn60 chaperonin family
PF00656	19	Caspase domain
PF01915	19	Glycosyl hydrolase family 3 C-terminal domain
PF00550	18	Phosphopantetheine attachment site
PF14310	18	Fibronectin type III-like domain
PF03537	18	Glycoside-hydrolase family GH114
PF00443	18	Ubiquitin carboxyl-terminal hydrolase
PF00933	18	Glycosyl hydrolase family 3 N terminal domain
PF13857	17	Ankyrin repeats (many copies)
PF00122	17	E1-E2 ATPase
PF00307	17	Calponin homology (CH) domain
PF00756	17	Putative esterase
PF00615	17	Regulator of G protein signaling domain
PF00787	17	PX domain
PF00128	16	Alpha amylase, catalytic domain
PF00160	16	Cyclophilin type peptidyl-prolyl cis-trans isomerase/CLD
PF16212	16	Phospholipid-translocating P-type ATPase C-terminal
PF00013	16	KH domain
PF00225	16	Kinesin motor domain
PF00320	16	GATA zinc finger
PF00735	15	Septin
PF02517	15	CAAX protease self-immunity
PF01694	15	Rhomboid family
PF00106	15	short chain dehydrogenase
PF00759	15	Glycosyl hydrolase family 9
PF00698	15	Acyl transferase domain
PF00293	15	NUDIX domain
PF01412	15	Putative GTPase activating protein for Arf
PF08282	14	haloacid dehalogenase-like hydrolase
PF00515	14	Tetratricopeptide repeat
PF00130	14	Phorbol esters/diacylglycerol binding domain (C1 domain)
PF03422	14	Carbohydrate binding module (family 6)
PF00291	14	Pyridoxal-phosphate dependent enzyme
PF00520	14	Ion transport protein
PF03949	14	Malic enzyme, NAD binding domain
PF00003	14	7 transmembrane sweet-taste receptor of 3 GCPR
PF12781	14	ATP-binding dynein motor region D5
PF11380	14	Stealth protein CR2, conserved region 2
PF00365	14	Phosphofructokinase
PF00627	14	UBA/TS-N domain
PF00117	14	Glutamine amidotransferase class-I
PF04055	13	Radical SAM superfamily
PF07727	13	Reverse transcriptase (RNA-dependent DNA polymerase)
PF13416	13	Bacterial extracellular solute-binding protein
PF00046	13	Homeobox domain
PF00632	13	HECT-domain (ubiquitin-transferase)
PF03629	13	Carbohydrate esterase, sialic acid-specific acetylesterase
PF00241	13	Cofilin/tropomyosin-type actin-binding protein
PF12780	13	P-loop containing dynein motor region D4
PF00583	13	Acetyltransferase (GNAT) family
PF16656	12	Purple acid Phosphatase, N-terminal domain
PF00023	12	Ankyrin repeat
PF00390	12	Malic enzyme, N-terminal domain
PF00079	12	Serpin (serine protease inhibitor)
PF00617	12	RasGEF domain
PF00503	12	G-protein alpha subunit
PF00514	12	Armadillo/beta-catenin-like repeat
PF02146	12	Sir2 family
PF03810	12	Importin-beta N-terminal domain
PF00465	12	Iron-containing alcohol dehydrogenase
PF01423	12	LSM domain
PF01228	12	Glycine radical
PF12937	12	F-box-like
PF01556	12	DnaJ C terminal domain
PF16561	12	Glycogen recognition site of AMP-activated protein kinase
PF00782	11	Dual specificity phosphatase, catalytic domain
PF02815	11	MIR domain
PF17101	11	Stealth protein CR1, conserved region 1
PF00091	11	Tubulin/FtsZ family, GTPase domain
PF16738	11	Starch-binding module 26
PF00009	11	Elongation factor Tu GTP binding domain
PF00134	11	Cyclin, N-terminal domain
PF01398	11	JAB1/Mov34/MPN/PAD-1 ubiquitin protease
PF00406	11	Adenylate kinase
PF04525	11	LURP-one-related
PF03372	11	Endonuclease/Exonuclease/phosphatase family
PF00498	11	FHA domain
PF14608	11	RNA-binding, Nab2-type zinc finger
PF16197	11	Ketoacyl-synthetase C-terminal extension
PF00534	11	Glycosyl transferases group 1
PF01363	11	FYVE zinc finger
PF07002	11	Copine
PF00022	11	Actin
PF00025	11	ADP-ribosylation factor family
PF03031	11	NLI interacting factor-like phosphatase
PF13414	11	TPR repeat
PF07859	10	alpha/beta hydrolase fold
PF16192	10	C-terminal four TMM region of protein-O-mannosyltransferase
PF11838	10	ERAP1-like C-terminal domain
PF11051	10	Mannosyltransferase putative
PF08241	10	Methyltransferase domain
PF05649	10	Peptidase family M13
PF12894	10	Anaphase-promoting complex subunit 4 WD40 domain
PF01145	10	SPFH domain / Band 7 family
PF00856	10	SET domain
PF05637	10	galactosyl transferase GMA12/MNN10 family
PF02156	10	Glycosyl hydrolase family 26
PF07717	10	Oligonucleotide/oligosaccharide-binding (OB)-fold
PF00428	10	60s Acidic ribosomal protein
PF00689	10	Cation transporting ATPase, C-terminus
PF00191	10	Annexin
PF00433	10	Protein kinase C terminal domain
PF14602	10	Hexapeptide repeat of succinyl-transferase
PF00821	10	Phosphoenolpyruvate carboxykinase C-terminal P-loop domain
PF08613	10	Cyclin
PF00044	10	Glyceraldehyde 3-phosphate dehydrogenase, NAD binding domain
PF00334	10	Nucleoside diphosphate kinase
PF12171	10	Zinc-finger double-stranded RNA-binding
PF04408	10	Helicase associated domain (HA2)
PF01302	10	CAP-Gly domain
PF04811	10	Sec23/Sec24 trunk domain
PF00107	10	Zinc-binding dehydrogenase
PF00188	10	Cysteine-rich secretory protein family
PF00780	10	CNH domain
PF00562	10	RNA polymerase Rpb2, domain 6
PF00704	10	Glycosyl hydrolases family 18
PF07714	10	Protein tyrosine kinase
PF00557	10	Metallopeptidase family M24
PF01431	10	Peptidase family M13
PF00650	9	CRAL/TRIO domain
PF00349	9	Hexokinase
PF00088	9	Trefoil (P-type) domain
PF01575	9	MaoC like domain
PF12464	9	Maltose acetyltransferase
PF05193	9	Peptidase M16 inactive domain
PF00389	9	D-isomer specific 2-hydroxyacid dehydrogenase, catalytic domain
PF00027	9	Cyclic nucleotide-binding domain
PF11901	9	Protein of unknown function (DUF3421)
PF13920	9	Zinc finger, C3HC4 type (RING finger)
PF00786	9	P21-Rho-binding domain
PF01433	9	Peptidase family M1 domain
PF12706	9	Beta-lactamase superfamily domain
PF02366	9	Dolichyl-phosphate-mannose-protein mannosyltransferase
PF00010	9	Helix-loop-helix DNA-binding domain
PF00753	9	Metallo-beta-lactamase superfamily
PF00618	9	RasGEF N-terminal motif
PF12775	9	P-loop containing dynein motor region D3
PF01585	9	G-patch domain
PF08033	9	Sec23/Sec24 beta-sandwich domain
PF13848	9	Thioredoxin-like domain
PF02826	9	D-isomer specific 2-hydroxyacid dehydrogenase, NAD binding domain
PF00300	9	Histidine phosphatase superfamily (branch 1)
PF00668	9	Condensation domain
PF00722	9	Glycosyl hydrolases family 16
PF08662	9	Eukaryotic translation initiation factor eIF2A
PF09394	9	Chagasin family peptidase inhibitor I42
PF00254	9	FKBP-type peptidyl-prolyl cis-trans isomerase
PF00642	9	Zinc finger C-x8-C-x5-C-x3-H type (and similar)
PF00702	9	haloacid dehalogenase-like hydrolase
PF14572	9	Phosphoribosyl synthetase-associated domain
PF00564	9	PB1 domain
PF01753	9	MYND finger
PF14580	9	Leucine-rich repeat
PF01553	8	Acyltransferase
PF13193	8	AMP-binding enzyme C-terminal domain
PF00637	8	Region in Clathrin and VPS
PF00657	8	GDSL-like Lipase/Acylhydrolase
PF00899	8	ThiF family
PF00675	8	Insulinase (Peptidase family M16)
PF00789	8	UBX domain
PF00096	8	Zinc finger, C2H2 type
PF03133	8	Tubulin-tyrosine ligase family
PF04810	8	Sec23/Sec24 zinc finger
PF04560	8	RNA polymerase Rpb2, domain 7
PF01490	8	Transmembrane amino acid transporter protein
PF05739	8	SNARE domain
PF01554	8	MatE
PF01926	8	50S ribosome-binding GTPase
PF00493	8	MCM2/3/5 family
PF00397	8	WW domain
PF00233	8	3'5'-cyclic nucleotide phosphodiesterase
PF04969	8	CS domain
PF07664	8	Ferrous iron transport protein B C terminus
PF01569	8	PAP2 superfamily
PF00982	8	Glycosyltransferase family 20
PF00890	8	FAD binding domain
PF00544	8	Pectate lyase
PF03370	8	Carbohydrate/starch-binding module (family 21)
PF17297	8	Phosphoenolpyruvate carboxykinase N-terminal domain
PF01116	8	Fructose-bisphosphate aldolase class-II
PF00881	8	Nitroreductase family
PF07885	8	Ion channel
PF00249	8	Myb-like DNA-binding domain
PF08442	8	ATP-grasp domain
PF02140	8	Galactose binding lectin domain
PF04815	8	Sec23/Sec24 helical domain
PF02149	8	Kinase associated domain 1
PF03798	8	TLC domain
PF04193	8	PQ loop repeat
PF02883	8	Adaptin C-terminal domain
PF02535	8	ZIP Zinc transporter
PF03357	8	Snf7
PF00262	8	Calreticulin family
PF02421	8	Ferrous iron transport protein B
PF01369	8	Sec7 domain
PF03144	8	Elongation factor Tu domain 2
PF00343	8	Carbohydrate phosphorylase
PF05693	8	Glycogen synthase
PF07670	8	Nucleoside recognition
PF03727	7	Hexokinase
PF03953	7	Tubulin C-terminal domain
PF08659	7	KR domain
PF13347	7	MFS/sugar transport protein
PF00133	7	tRNA synthetases class I (I, L, M and V)
PF07742	7	BTG family
PF07647	7	SAM domain (Sterile alpha motif)
PF04563	7	RNA polymerase beta subunit
PF02800	7	Glyceraldehyde 3-phosphate dehydrogenase, C-terminal domain
PF17207	7	MCM OB domain
PF02854	7	MIF4G domain
PF02887	7	Pyruvate kinase, alpha/beta domain
PF02185	7	Hr1 repeat
PF01529	7	DHHC palmitoyltransferase
PF10431	7	C-terminal, D2-small domain, of ClpB protein
PF11904	7	GPCR-chaperone
PF00535	7	Glycosyl transferase family 2
PF07724	7	AAA domain (Cdc48 subfamily)
PF03388	7	Legume-like lectin family
PF12774	7	Hydrolytic ATP binding site of dynein motor region D1
PF00208	7	Glutamate/Leucine/Phenylalanine/Valine dehydrogenase
PF12799	7	Leucine Rich repeats (2 copies)
PF00957	7	Synaptobrevin
PF01055	7	Glycosyl hydrolases family 31
PF00388	7	Phosphatidylinositol-specific phospholipase C, X domain
PF10584	7	Proteasome subunit A N-terminal signature
PF01008	7	Initiation factor 2 subunit family
PF01699	7	Sodium/calcium exchanger protein
PF00439	7	Bromodomain
PF04142	7	Nucleotide-sugar transporter
PF08264	7	Anticodon-binding domain of tRNA
PF00690	7	Cation transporter/ATPase, N-terminus
PF00456	7	Transketolase, thiamine diphosphate binding domain
PF00626	7	Gelsolin repeat
PF00611	7	Fes/CIP4, and EFC/F-BAR homology domain
PF00571	7	CBS domain
PF02020	7	eIF4-gamma/eIF5/eIF2-epsilon
PF01248	7	Ribosomal protein L7Ae/L30e/S12e/Gadd45 family
PF00447	7	HSF-type DNA-binding
PF13649	7	Methyltransferase domain
PF00266	7	Aminotransferase class-V
PF14765	7	Polyketide synthase dehydratase
PF03060	7	Nitronate monooxygenase
PF13353	7	4Fe-4S single cluster domain
PF13793	7	N-terminal domain of ribose phosphate pyrophosphokinase
PF01504	7	Phosphatidylinositol-4-phosphate 5-Kinase
PF02358	7	Trehalose-phosphatase
PF04023	7	FeoA domain
PF04053	7	Coatomer WD associated region
PF16209	7	Phospholipid-translocating ATPase N-terminal
PF00804	7	Syntaxin
PF00784	7	MyTH4 domain
PF00170	7	bZIP transcription factor
PF00454	6	Phosphatidylinositol 3- and 4-kinase
PF13597	6	Anaerobic ribonucleoside-triphosphate reductase
PF00995	6	Sec1 family
PF01546	6	Peptidase family M20/M25/M40
PF00694	6	Aconitase C-terminal domain
PF01501	6	Glycosyl transferase family 8
PF00575	6	S1 RNA binding domain
PF14308	6	X-domain of DnaJ-containing
PF03143	6	Elongation factor Tu C-terminal domain
PF00928	6	Adaptor complexes medium subunit family
PF12848	6	ABC transporter
PF13646	6	HEAT repeats
PF12784	6	PD-(D/E)XK nuclease family transposase
PF00538	6	linker histone H1 and H5 family
PF00587	6	tRNA synthetase class II core domain (G, H, P, S and T)
PF01151	6	GNS1/SUR4 family
PF01428	6	AN1-like Zinc finger
PF08953	6	Domain of unknown function (DUF1899)
PF01545	6	Cation efflux family
PF05186	6	Dpy-30 motif
PF13519	6	von Willebrand factor type A domain
PF00176	6	SNF2 family N-terminal domain
PF04564	6	U-box domain
PF00483	6	Nucleotidyl transferase
PF08393	6	Dynein heavy chain, N-terminal region 2
PF01576	6	Myosin tail
PF08766	6	DEK C terminal domain
PF00658	6	Poly-adenylate binding protein, unique domain
PF00850	6	Histone deacetylase domain
PF02812	6	Glu/Leu/Phe/Val dehydrogenase, dimerisation domain
PF01357	6	Pollen allergen
PF02774	6	Semialdehyde dehydrogenase, dimerisation domain
PF14624	6	VWA / Hh protein intein-like
PF12352	6	Snare region anchored in the vesicle membrane C-terminus
PF01757	6	Acyltransferase family
PF02878	6	Phosphoglucomutase/phosphomannomutase, alpha/beta/alpha domain I
PF13012	6	Maintenance of mitochondrial structure and function
PF01432	6	Peptidase family M3
PF04998	6	RNA polymerase Rpb1, domain 5
PF00258	6	Flavodoxin
PF05922	6	Peptidase inhibitor I9
PF00996	6	GDP dissociation inhibitor
PF00173	6	Cytochrome b5-like Heme/Steroid binding domain
PF08284	6	Retroviral aspartyl protease
PF00132	6	Bacterial transferase hexapeptide (six repeats)
PF01843	6	DIL domain
PF02145	6	Rap/ran-GAP
PF00682	6	HMGL-like
PF14521	6	Lysine-specific metallo-endopeptidase
PF00330	6	Aconitase family (aconitate hydratase)
PF10540	6	Munc13 (mammalian uncoordinated) homology domain
PF00616	6	GTPase-activator protein for Ras-like GTPase
PF01217	6	Clathrin adaptor complex small chain
PF00696	6	Amino acid kinase family
PF08240	6	Alcohol dehydrogenase GroES-like domain
PF00350	6	Dynamin family
PF13418	6	Galactose oxidase, central domain
PF13802	6	Galactose mutarotase-like
PF00622	6	SPRY domain
PF02204	5	Vacuolar sorting protein 9 (VPS9) domain
PF02493	5	MORN repeat
PF02806	5	Alpha amylase, C-terminal all-beta domain
PF03129	5	Anticodon binding domain
PF03114	5	BAR domain
PF00183	5	Hsp90 protein
PF02779	5	Transketolase, pyrimidine binding domain
PF01613	5	Flavin reductase like domain
PF08354	5	Domain of unknown function (DUF1729)
PF04072	5	Leucine carboxyl methyltransferase
PF14623	5	Hint-domain
PF13868	5	Trichohyalin-plectin-homology domain
PF14683	5	Polysaccharide lyase family 4, domain III
PF02181	5	Formin Homology 2 Domain
PF04258	5	Signal peptide peptidase
PF12931	5	Sec23-binding domain of Sec16
PF00326	5	Prolyl oligopeptidase family
PF02729	5	Aspartate/ornithine carbamoyltransferase, carbamoyl-P binding domain
PF01062	5	Bestrophin, RFP-TM, chloride channel
PF07728	5	AAA domain (dynein-related subfamily)
PF01066	5	CDP-alcohol phosphatidyltransferase
PF03211	5	Pectate lyase
PF12756	5	C2H2 type zinc-finger (2 copies)
PF15902	5	Sortilin, neurotensin receptor 3,
PF01326	5	Pyruvate phosphate dikinase, PEP/pyruvate binding domain
PF03931	5	Skp1 family, tetramerisation domain
PF00180	5	Isocitrate/isopropylmalate dehydrogenase
PF02558	5	Ketopantoate reductase PanE/ApbA
PF00478	5	IMP dehydrogenase / GMP reductase domain
PF00999	5	Sodium/hydrogen exchanger family
PF13923	5	Zinc finger, C3HC4 type (RING finger)
PF10075	5	CSN8/PSMD8/EIF3K family
PF13774	5	Regulated-SNARE-like domain
PF00102	5	Protein-tyrosine phosphatase
PF09359	5	VTC domain
PF14559	5	Tetratricopeptide repeat
PF12265	5	Histone-binding protein RBBP4 or subunit C of CAF1 complex
PF16363	5	GDP-mannose 4,6 dehydratase
PF01479	5	S4 domain
PF16969	5	RNA-binding signal recognition particle 68
PF15979	5	Glycosyl hydrolase family 115
PF09295	5	ChAPs (Chs5p-Arf1p-binding proteins)
PF00098	5	Zinc knuckle
PF16863	5	N-terminal barrel of NtMGAM and CtMGAM, maltase-glucoamylase
PF01096	5	Transcription factor S-II (TFIIS)
PF03134	5	TB2/DP1, HVA22 family
PF01603	5	Protein phosphatase 2A regulatory B subunit (B56 family)
PF02845	5	CUE domain
PF02893	5	GRAM domain
PF13424	5	Tetratricopeptide repeat
PF00206	5	Lyase
PF04712	5	Radial spokehead-like protein
PF10645	5	Carbohydrate binding
PF00156	5	Phosphoribosyl transferase domain
PF01138	5	3' exoribonuclease family, domain 1
PF02114	5	Phosducin
PF02200	5	STE like transcription factor
PF02786	5	Carbamoyl-phosphate synthase L chain, ATP binding domain
PF13432	5	Tetratricopeptide repeat
PF01717	5	Cobalamin-independent synthase, Catalytic domain
PF07159	5	Protein of unknown function (DUF1394)
PF04724	5	Glycosyltransferase family 17
PF04565	5	RNA polymerase Rpb2, domain 3
PF01105	5	emp24/gp25L/p24 family/GOLD
PF02077	5	SURF4 family
PF02922	5	Carbohydrate-binding module 48 (Isoamylase N-terminal domain)
PF01263	5	Aldose 1-epimerase
PF02171	5	Piwi domain
PF09729	5	Gti1/Pac2 family
PF02847	5	MA3 domain
PF01648	5	4'-phosphopantetheinyl transferase superfamily
PF08632	5	Activator of mitotic machinery Cdc14 phosphatase activation C-term
PF14976	5	FAM72 protein
PF00288	5	GHMP kinases N terminal domain
PF03553	5	Na+/H+ antiporter family
PF01336	5	OB-fold nucleic acid binding domain
PF00006	5	ATP synthase alpha/beta family, nucleotide-binding domain
PF00092	5	von Willebrand factor type A domain
PF02305	5	Capsid protein (F protein)
PF00536	5	SAM domain (Sterile alpha motif)
PF02136	5	Nuclear transport factor 2 (NTF2) domain
PF00450	5	Serine carboxypeptidase
PF00113	5	Enolase, C-terminal TIM barrel domain
PF00988	5	Carbamoyl-phosphate synthase small chain, CPSase domain
PF10609	5	NUBPL iron-transfer P-loop NTPase
PF01764	5	Lipase (class 3)
PF00185	5	Aspartate/ornithine carbamoyltransferase, Asp/Orn binding domain
PF03770	5	Inositol polyphosphate kinase
PF01798	5	snoRNA binding domain, fibrillarin
PF02780	5	Transketolase, C-terminal domain
PF14938	5	Soluble NSF attachment protein, SNAP
PF00533	5	BRCA1 C Terminus (BRCT) domain
PF02656	5	Domain of unknown function (DUF202)
PF04515	5	Plasma-membrane choline transporter
PF00125	5	Core histone H2A/H2B/H3/H4
PF14262	5	Carbohydrate-binding domain-containing protein Cthe_2159
PF03983	4	SLA1 homology domain 1, SHD1
PF00679	4	Elongation factor G C-terminus
PF11997	4	Domain of unknown function (DUF3492)
PF08699	4	Argonaute linker 1 domain
PF06244	4	Coiled-coil domain-containing protein 124
PF01189	4	16S rRNA methyltransferase RsmB/F
PF02629	4	CoA binding domain
PF02866	4	lactate/malate dehydrogenase, alpha/beta C-terminal domain
PF01053	4	Cys/Met metabolism PLP-dependent enzyme
PF16300	4	Type of WD40 repeat
PF12436	4	ICP0-binding domain of Ubiquitin-specific protease 7
PF01212	4	Beta-eliminating lyase
PF01150	4	GDA1/CD39 (nucleoside phosphatase) family
PF06456	4	Arfaptin-like domain
PF01920	4	Prefoldin subunit
PF00892	4	EamA-like transporter family
PF04097	4	Nup93/Nic96
PF02127	4	Aminopeptidase I zinc metalloprotease (M18)
PF04818	4	RNA polymerase II-binding domain.
PF08156	4	NOP5NT (NUC127) domain
PF08011	4	PD-(D/E)XK nuclease superfamily
PF16990	4	Carbohydrate binding module (family 35)
PF17035	4	Bromodomain extra-terminal - transcription regulation
PF07970	4	Endoplasmic reticulum vesicle transporter
PF16187	4	Middle or third domain of peptidase_M16
PF00610	4	Domain found in Dishevelled, Egl-10, and Pleckstrin (DEP)
PF03367	4	ZPR1 zinc-finger domain
PF05368	4	NmrA-like family
PF09336	4	Vps4 C terminal oligomerisation domain
PF04137	4	Endoplasmic Reticulum Oxidoreductin 1 (ERO1)
PF13634	4	Nucleoporin FG repeat region
PF01456	4	Mucin-like glycoprotein
PF05804	4	Kinesin-associated protein (KAP)
PF08389	4	Exportin 1-like protein
PF05450	4	Nicastrin
PF06068	4	TIP49 C-terminus
PF04427	4	Brix domain
PF02128	4	Fungalysin metallopeptidase (M36)
PF00335	4	Tetraspanin family
PF00462	4	Glutaredoxin
PF01676	4	Metalloenzyme superfamily
PF00631	4	GGL domain
PF01532	4	Glycosyl hydrolase family 47
PF00888	4	Cullin family
PF00623	4	RNA polymerase Rpb1, domain 2
PF06017	4	Unconventional myosin tail, actin- and lipid-binding
PF14555	4	UBA-like domain
PF04191	4	Phospholipid methyltransferase
PF03950	4	tRNA synthetases class I (E and Q), anti-codon binding domain
PF12051	4	Protein of unknown function (DUF3533)
PF00056	4	lactate/malate dehydrogenase, NAD binding domain
PF01466	4	Skp1 family, dimerisation domain
PF00638	4	RanBP1 domain
PF16488	4	Argonaute linker 2 domain
PF06565	4	DUF1126 PH-like domain
PF01080	4	Presenilin
PF06371	4	Diaphanous GTPase-binding Domain
PF05495	4	CHY zinc finger
PF00808	4	Histone-like transcription factor (CBF/NF-Y) and archaeal histone
PF03062	4	MBOAT, membrane-bound O-acyltransferase family
PF03645	4	Tctex-1 family
PF01749	4	Importin beta binding domain
PF16173	4	Domain of unknown function (DUF4874)
PF01391	4	Collagen triple helix repeat (20 copies)
PF01496	4	V-type ATPase 116kDa subunit family
PF03721	4	UDP-glucose/GDP-mannose dehydrogenase family, NAD binding domain
PF00250	4	Forkhead domain
PF08449	4	UAA transporter family
PF04006	4	Mpp10 protein
PF04212	4	MIT (microtubule interacting and transport) domain
PF02142	4	MGS-like domain
PF01282	4	Ribosomal protein S24e
PF01663	4	Type I phosphodiesterase / nucleotide pyrophosphatase
PF00749	4	tRNA synthetases class I (E and Q), catalytic domain
PF04468	4	PSP1 C-terminal conserved region
PF02787	4	Carbamoyl-phosphate synthetase large chain, oligomerisation domain
PF04983	4	RNA polymerase Rpb1, domain 3
PF05879	4	Root hair defective 3 GTP-binding protein (RHD3)
PF16186	4	Atypical Arm repeat
PF13967	4	Late exocytosis, associated with Golgi transport
PF00205	4	Thiamine pyrophosphate enzyme, central domain
PF13959	4	Domain of unknown function (DUF4217)
PF00319	4	SRF-type transcription factor (DNA-binding and dimerisation domain)
PF04153	4	NOT2 / NOT3 / NOT5 family
PF16487	4	Mid domain of argonaute
PF13850	4	Endoplasmic Reticulum-Golgi Intermediate Compartment (ERGIC)
PF16016	4	Domain of unknown function (DUF4782)
PF00635	4	MSP (Major sperm protein) domain
PF00152	4	tRNA synthetases class II (D, K and N)
PF12932	4	Vesicle coat trafficking protein Sec16 mid-region
PF16891	4	Serine-threonine protein phosphatase N-terminal domain
PF03105	4	SPX domain
PF00373	4	FERM central domain
PF12697	4	Alpha/beta hydrolase family
PF16116	4	Domain of unknown function (DUF4832)
PF00793	4	DAHP synthetase I family
PF02775	4	Thiamine pyrophosphate enzyme, C-terminal TPP binding domain
PF12718	4	Tropomyosin like
PF02889	4	Sec63 Brl domain
PF02383	4	SacI homology domain
PF15405	4	Pleckstrin homology domain
PF10601	4	LITAF-like zinc ribbon domain
PF08190	4	pre-RNA processing PIH1/Nop17
PF05664	4	Plant family of unknown function (DUF810)
PF00224	4	Pyruvate kinase, barrel domain
PF13460	4	NAD(P)H-binding
PF00857	4	Isochorismatase family
PF01370	4	NAD dependent epimerase/dehydratase family
PF00646	4	F-box domain
PF04707	4	PRELI-like family
PF03055	4	Retinal pigment epithelial membrane protein
PF13671	4	AAA domain
PF16073	4	Starter unit:ACP transacylase in aflatoxin biosynthesis
PF01048	4	Phosphorylase superfamily
PF00917	4	MATH domain
PF02874	4	ATP synthase alpha/beta family, beta-barrel domain
PF05383	4	La domain
PF05000	4	RNA polymerase Rpb1, domain 4
PF00297	4	Ribosomal protein L3
PF00568	4	WH1 domain
PF01873	4	Domain found in IF2B/IF5
PF07991	4	Acetohydroxy acid isomeroreductase, NADPH-binding domain
PF00916	4	Sulfate permease family
PF12348	4	CLASP N terminal
PF12146	4	Serine aminopeptidase, S33
PF01417	4	ENTH domain
PF01238	4	Phosphomannose isomerase type I
PF01851	4	Proteasome/cyclosome repeat
PF09820	4	Predicted AAA-ATPase
PF01214	4	Casein kinase II regulatory subunit
PF13513	4	HEAT-like repeat
PF00652	4	Ricin-type beta-trefoil lectin domain
PF02776	4	Thiamine pyrophosphate enzyme, N-terminal TPP binding domain
PF02996	4	Prefoldin subunit
PF14497	4	Glutathione S-transferase, C-terminal domain
PF00806	4	Pumilio-family RNA binding repeat
PF10585	4	Ubiquitin-activating enzyme active site
PF00137	4	ATP synthase subunit C
PF06045	4	Rhamnogalacturonate lyase family
PF13847	4	Methyltransferase domain
PF00724	4	NADH:flavin oxidoreductase / NADH oxidase family
PF00328	4	Histidine phosphatase superfamily (branch 2)
PF13365	4	Trypsin-like peptidase domain
PF07749	4	Endoplasmic reticulum protein ERp29, C-terminal domain
PF01704	4	UTP--glucose-1-phosphate uridylyltransferase
PF05470	4	Eukaryotic translation initiation factor 3 subunit 8 N-terminus
PF03765	4	CRAL/TRIO, N-terminal domain
PF12763	4	Cytoskeletal-regulatory complex EF hand
PF03381	4	LEM3 (ligand-effect modulator 3) family / CDC50 family
PF04499	4	SIT4 phosphatase-associated protein
PF02798	4	Glutathione S-transferase, N-terminal domain
PF02824	4	TGS domain
PF00790	4	VHS domain
PF01095	4	Pectinesterase
PF13865	4	C-terminal duplication domain of Friend of PRMT1
PF07992	4	Pyridine nucleotide-disulphide oxidoreductase
PF00815	4	Histidinol dehydrogenase
PF02170	4	PAZ domain
PF01435	4	Peptidase family M48
PF02148	4	Zn-finger in ubiquitin-hydrolases and other protein
PF00788	4	Ras association (RalGDS/AF-6) domain
PF01207	4	Dihydrouridine synthase (Dus)
PF17123	4	RING-like zinc finger
PF01294	4	Ribosomal protein L13e
PF01239	4	Protein prenyltransferase alpha subunit repeat
PF13722	4	5TM C-terminal transporter carbon starvation CstA
PF07653	4	Variant SH3 domain
PF02466	4	Tim17/Tim22/Tim23/Pmp24 family
PF04882	3	Peroxin-3
PF01163	3	RIO1 family
PF15456	3	Up-regulated During Septation
PF17010	3	Domain of unknown function (DUF5092)
PF04042	3	DNA polymerase alpha/epsilon subunit B
PF00903	3	Glyoxalase/Bleomycin resistance protein/Dioxygenase superfamily
PF00120	3	Glutamine synthetase, catalytic domain
PF16893	3	Fibronectin type III domain
PF01246	3	Ribosomal protein L24e
PF00887	3	Acyl CoA binding protein
PF05712	3	MRG
PF04687	3	Microvirus H protein (pilot protein)
PF05773	3	RWD domain
PF11717	3	RNA binding activity-knot of a chromodomain
PF13242	3	HAD-hyrolase-like
PF16491	3	CAAX prenyl protease N-terminal, five membrane helices
PF00415	3	Regulator of chromosome condensation (RCC1) repeat
PF01591	3	6-phosphofructo-2-kinase
PF02991	3	Autophagy protein Atg8 ubiquitin like
PF00378	3	Enoyl-CoA hydratase/isomerase
PF03159	3	XRN 5'-3' exonuclease N-terminus
PF08518	3	Spa2 homology domain (SHD) of GIT
PF13086	3	AAA domain
PF01070	3	FMN-dependent dehydrogenase
PF07993	3	Male sterility protein
PF13181	3	Tetratricopeptide repeat
PF01434	3	Peptidase family M41
PF16486	3	N-terminal domain of argonaute
PF14551	3	MCM N-terminal domain
PF00754	3	F5/8 type C domain
PF01842	3	ACT domain
PF03720	3	UDP-glucose/GDP-mannose dehydrogenase family, UDP binding domain
PF00654	3	Voltage gated chloride channel
PF01368	3	DHH family
PF01269	3	Fibrillarin
PF00670	3	S-adenosyl-L-homocysteine hydrolase, NAD binding domain
PF14438	3	Ataxin 2 SM domain
PF01679	3	Proteolipid membrane potential modulator
PF00647	3	Elongation factor 1 gamma, conserved domain
PF03719	3	Ribosomal protein S5, C-terminal domain
PF02773	3	S-adenosylmethionine synthetase, C-terminal domain
PF00956	3	Nucleosome assembly protein (NAP)
PF10032	3	Phosphate transport (Pho88)
PF10294	3	Lysine methyltransferase
PF01634	3	ATP phosphoribosyltransferase
PF12695	3	Alpha/beta hydrolase family
PF00852	3	Glycosyltransferase family 10 (fucosyltransferase) C-term
PF05224	3	NDT80 / PhoG like DNA-binding family
PF02833	3	DHHA2 domain
PF03732	3	Retrotransposon gag protein
PF06428	3	GDP/GTP exchange factor Sec2p
PF01833	3	IPT/TIG domain
PF13385	3	Concanavalin A-like lectin/glucanases superfamily
PF06741	3	LsmAD domain
PF00929	3	Exonuclease
PF01394	3	Clathrin propeller repeat
PF00764	3	Arginosuccinate synthase
PF10531	3	SLBB domain
PF13949	3	ALIX V-shaped domain binding to HIV
PF14299	3	Phloem protein 2
PF01472	3	PUA domain
PF00641	3	Zn-finger in Ran binding protein and others
PF12738	3	twin BRCT domain
PF06479	3	Ribonuclease 2-5A
PF01406	3	tRNA synthetases class I (C) catalytic domain
PF00211	3	Adenylate and Guanylate cyclase catalytic domain
PF04567	3	RNA polymerase Rpb2, domain 5
PF14703	3	Cytosolic domain of 10TM putative phosphate transporter
PF01483	3	Proprotein convertase P-domain
PF04488	3	Glycosyltransferase sugar-binding region containing DXD motif
PF16131	3	Torus domain
PF13510	3	2Fe-2S iron-sulfur cluster binding domain
PF13854	3	Kelch motif
PF07521	3	Zn-dependent metallo-hydrolase RNA specificity domain
PF10058	3	Predicted integral membrane zinc-ribbon metal-binding protein
PF00773	3	RNB domain
PF14769	3	Flagellar C1a complex subunit C1a-32
PF08759	3	Glycosyltransferase GT-D fold
PF00230	3	Major intrinsic protein
PF14533	3	Ubiquitin-specific protease C-terminal
PF13874	3	Nucleoporin complex subunit 54
PF01000	3	RNA polymerase Rpb3/RpoA insert domain
PF13087	3	AAA domain
PF03297	3	S25 ribosomal protein
PF13238	3	AAA domain
PF02862	3	DDHD domain
PF03600	3	Citrate transporter
PF07973	3	Threonyl and Alanyl tRNA synthetase second additional domain
PF01201	3	Ribosomal protein S8e
PF16369	3	C-terminal of Glycosyl hydrolases family 43
PF14570	3	RING/Ubox like zinc-binding domain
PF05648	3	Peroxisomal biogenesis factor 11 (PEX11)
PF01061	3	ABC-2 type transporter
PF01849	3	NAC domain
PF01988	3	VIT family
PF08513	3	LisH
PF01480	3	PWI domain
PF01728	3	FtsJ-like methyltransferase
PF14825	3	Domain of unknown function (DUF4483)
PF04547	3	Calcium-activated chloride channel
PF09273	3	Rubisco LSMT substrate-binding
PF00828	3	Ribosomal proteins 50S-L15, 50S-L18e, 60S-L27A
PF01154	3	Hydroxymethylglutaryl-coenzyme A synthase N terminal
PF00459	3	Inositol monophosphatase family
PF01237	3	Oxysterol-binding protein
PF13393	3	Histidyl-tRNA synthetase
PF10607	3	CTLH/CRA C-terminal to LisH motif domain
PF00333	3	Ribosomal protein S5, N-terminal domain
PF01697	3	Glycosyltransferase family 92
PF01450	3	Acetohydroxy acid isomeroreductase, catalytic domain
PF14374	3	60S ribosomal protein L4 C-terminal domain
PF00579	3	tRNA synthetases class I (W and Y)
PF00467	3	KOW motif
PF16661	3	Metallo-beta-lactamase superfamily domain
PF12678	3	RING-H2 zinc finger domain
PF00883	3	Cytosol aminopeptidase family, catalytic domain
PF03725	3	3' exoribonuclease family, domain 2
PF08616	3	Stabilization of polarity axis
PF02037	3	SAP domain
PF00448	3	SRP54-type protein, GTPase domain
PF03909	3	BSD domain
PF03635	3	Vacuolar protein sorting-associated protein 35
PF10165	3	Guanine nucleotide exchange factor synembryn
PF09337	3	His(2)-Cys(2) zinc finger
PF08512	3	Histone chaperone Rttp106-like
PF00391	3	PEP-utilising enzyme, mobile domain
PF05843	3	Suppressor of forked protein (Suf)
PF00474	3	Sodium:solute symporter family
PF02450	3	Lecithin:cholesterol acyltransferase
PF01459	3	Eukaryotic porin
PF02550	3	Acetyl-CoA hydrolase/transferase N-terminal domain
PF12783	3	Guanine nucleotide exchange factor in Golgi transport N-terminal
PF01565	3	FAD binding domain
PF13302	3	Acetyltransferase (GNAT) domain
PF03435	3	Saccharopine dehydrogenase NADP binding domain
PF00573	3	Ribosomal protein L4/L1 family
PF00313	3	'Cold-shock' DNA-binding domain
PF00432	3	Prenyltransferase and squalene oxidase repeat
PF00569	3	Zinc finger, ZZ type
PF02872	3	5'-nucleotidase, C-terminal domain
PF09794	3	Transport protein Avl9
PF13344	3	Haloacid dehalogenase-like hydrolase
PF02005	3	N2,N2-dimethylguanosine tRNA methyltransferase
PF01026	3	TatD related DNase
PF00466	3	Ribosomal protein L10
PF05914	3	RIB43A
PF10367	3	Vacuolar sorting protein 39 domain 2
PF02799	3	Myristoyl-CoA:protein N-myristoyltransferase, C-terminal domain
PF16944	3	Fungal potassium channel
PF05008	3	Vesicle transport v-SNARE protein N-terminus
PF05221	3	S-adenosyl-L-homocysteine hydrolase
PF03661	3	Uncharacterised protein family (UPF0121)
PF12710	3	haloacid dehalogenase-like hydrolase
PF03901	3	Alg9-like mannosyltransferase family
PF12437	3	Glutamine synthetase type III N terminal
PF03637	3	Mob1/phocein family
PF02554	3	Carbon starvation protein CstA
PF04768	3	NAT, N-acetyltransferase, of N-acetylglutamate synthase
PF02197	3	Regulatory subunit of type II PKA R-subunit
PF01588	3	Putative tRNA binding domain
PF00628	3	PHD-finger
PF03177	3	Non-repetitive/WGA-negative nucleoporin C-terminal
PF00251	3	Glycosyl hydrolases family 32 N-terminal domain
PF01044	3	Vinculin family
PF03836	3	RasGAP C-terminus
PF13864	3	Calmodulin-binding
PF05277	3	Protein of unknown function (DUF726)
PF01267	3	F-actin capping protein alpha subunit
PF03029	3	Conserved hypothetical ATP binding protein
PF04068	3	Possible Fer4-like domain in RNase L inhibitor, RLI
PF00438	3	S-adenosylmethionine synthetase, N-terminal domain
PF14686	3	Polysaccharide lyase family 4, domain II
PF08711	3	TFIIS helical bundle-like domain
PF09412	3	Endoribonuclease XendoU
PF01031	3	Dynamin central region
PF01513	3	ATP-NAD kinase
PF00613	3	Phosphoinositide 3-kinase family, accessory domain (PIK domain)
PF01221	3	Dynein light chain type 1
PF00736	3	EF-1 guanine nucleotide exchange domain
PF00464	3	Serine hydroxymethyltransferase
PF01193	3	RNA polymerase Rpb3/Rpb11 dimerisation domain
PF08550	3	Fungal protein of unknown function (DUF1752)
PF02518	3	Histidine kinase-, DNA gyrase B-, and HSP90-like ATPase
PF01476	3	LysM domain
PF01015	3	Ribosomal S3Ae family
PF10996	3	Beta-Casp domain
PF03097	3	BRO1-like domain
PF08626	3	Transport protein Trs120 or TRAPPC9, TRAPP II complex subunit
PF14668	3	Rapamycin-insensitive companion of mTOR, domain 5
PF08540	3	Hydroxymethylglutaryl-coenzyme A synthase C terminal
PF00625	3	Guanylate kinase
PF01778	3	Ribosomal L28e protein family
PF14204	3	Ribosomal L18 C-terminal region
PF13522	3	Glutamine amidotransferase domain
PF02906	3	Iron only hydrogenase large subunit, C-terminal domain
PF03835	3	Rad4 transglutaminase-like domain
PF02714	3	Calcium-dependent channel, 7TM region, putative phosphate
PF00984	3	UDP-glucose/GDP-mannose dehydrogenase family, central domain
PF04727	3	ELMO/CED-12 family
PF01521	3	Iron-sulphur cluster biosynthesis
PF08407	3	Chitin synthase N-terminal
PF01063	3	Amino-transferase class IV
PF05529	3	B-cell receptor-associated protein 31-like
PF15411	3	Pleckstrin homology domain
PF00485	3	Phosphoribulokinase / Uridine kinase family
PF04566	3	RNA polymerase Rpb2, domain 4
PF01909	3	Nucleotidyltransferase domain
PF16076	3	Acyltransferase C-terminus
PF14223	3	gag-polypeptide of LTR copia-type
PF02772	3	S-adenosylmethionine synthetase, central domain
PF05622	3	HOOK protein
PF04117	2	Mpv17 / PMP22 family
PF02225	2	PA domain
PF05182	2	Fip1 motif
PF01769	2	Divalent cation transporter
PF08154	2	NLE (NUC135) domain
PF03630	2	Fumble
PF12220	2	U1 small nuclear ribonucleoprotein of 70kDa MW N terminal
PF02502	2	Ribose/Galactose Isomerase
PF01984	2	Double-stranded DNA-binding domain
PF08079	2	Ribosomal L30 N-terminal domain
PF13964	2	Kelch motif
PF13415	2	Galactose oxidase, central domain
PF10557	2	Cullin protein neddylation domain
PF06367	2	Diaphanous FH3 Domain
PF01090	2	Ribosomal protein S19e
PF13881	2	Ubiquitin-2 like Rad60 SUMO-like
PF05743	2	UEV domain
PF07876	2	Stress responsive A/B Barrel Domain
PF01259	2	SAICAR synthetase
PF03853	2	YjeF-related protein N-terminus
PF16906	2	Ribosomal proteins L26 eukaryotic, L24P archaeal
PF14587	2	O-Glycosyl hydrolase family 30
PF06738	2	Putative threonine/serine exporter
PF07650	2	KH domain
PF02978	2	Signal peptide binding domain
PF10415	2	Fumarase C C-terminus
PF01270	2	Glycosyl hydrolases family 8
PF00201	2	UDP-glucoronosyl and UDP-glucosyl transferase
PF08618	2	Transcription factor Opi1
PF03417	2	Acyl-coenzyme A:6-aminopenicillanic acid acyl-transferase
PF11875	2	Domain of unknown function (DUF3395)
PF06883	2	RNA polymerase I, Rpa2 specific domain
PF03463	2	eRF1 domain 1
PF08624	2	Chromatin remodelling complex Rsc7/Swp82 subunit
PF13304	2	AAA domain, putative AbiEii toxin, Type IV TA system
PF01176	2	Translation initiation factor 1A / IF-1
PF00930	2	Dipeptidyl peptidase IV (DPP IV) N-terminal region
PF03224	2	V-ATPase subunit H
PF13398	2	Peptidase M50B-like
PF02925	2	Bacteriophage scaffolding protein D
PF03939	2	Ribosomal protein L23, N-terminal domain
PF00923	2	Transaldolase/Fructose-6-phosphate aldolase
PF02837	2	Glycosyl hydrolases family 2, sugar binding domain
PF03483	2	B3/4 domain
PF11976	2	Ubiquitin-2 like Rad60 SUMO-like
PF08546	2	Ketopantoate reductase PanE/ApbA C terminal
PF04930	2	FUN14 family
PF01925	2	Sulfite exporter TauE/SafE
PF16741	2	mRNA-decapping enzyme C-terminus
PF08726	2	Ca2+ insensitive EF hand
PF12682	2	Flavodoxin
PF02179	2	BAG domain
PF07738	2	Sad1 / UNC-like C-terminal
PF07529	2	HSA
PF13812	2	Pentatricopeptide repeat domain
PF12317	2	Intraflagellar transport complex B protein 46 C terminal
PF02259	2	FAT domain
PF02836	2	Glycosyl hydrolases family 2, TIM barrel domain
PF04424	2	MINDY deubiquitinase
PF08069	2	Ribosomal S13/S15 N-terminal domain
PF14878	2	Death-like domain of SPT6
PF01667	2	Ribosomal protein S27
PF00282	2	Pyridoxal-dependent decarboxylase conserved domain
PF02777	2	Iron/manganese superoxide dismutases, C-terminal domain
PF03556	2	Cullin binding
PF01608	2	I/LWEQ domain
PF01251	2	Ribosomal protein S7e
PF04065	2	Not1 N-terminal domain, CCR4-Not complex component
PF04263	2	Thiamin pyrophosphokinase, catalytic domain
PF08767	2	CRM1 C terminal
PF05719	2	Golgi phosphoprotein 3 (GPP34)
PF08502	2	LeuA allosteric (dimerisation) domain
PF13840	2	ACT domain
PF00989	2	PAS fold
PF03847	2	Transcription initiation factor TFIID subunit A
PF02153	2	Prephenate dehydrogenase
PF15916	2	Domain of unknown function (DUF4743)
PF01507	2	Phosphoadenosine phosphosulfate reductase family
PF01805	2	Surp module
PF01226	2	Formate/nitrite transporter
PF06415	2	BPG-independent PGAM N-terminus (iPGM_N)
PF03952	2	Enolase, N-terminal domain
PF00484	2	Carbonic anhydrase
PF02190	2	ATP-dependent protease La (LON) substrate-binding domain
PF10168	2	Nuclear pore component
PF00171	2	Aldehyde dehydrogenase family
PF01409	2	tRNA synthetases class II core domain (F)
PF06098	2	Radial spoke protein 3
PF03153	2	Transcription factor IIA, alpha/beta subunit
PF05064	2	Nsp1-like C-terminal region
PF10403	2	Rad4 beta-hairpin domain 1
PF08903	2	Domain of unknown function (DUF1846)
PF06966	2	Protein of unknown function (DUF1295)
PF00026	2	Eukaryotic aspartyl protease
PF01687	2	Riboflavin kinase
PF10443	2	RNA12 protein
PF06202	2	Amylo-alpha-1,6-glucosidase
PF01283	2	Ribosomal protein S26e
PF00175	2	Oxidoreductase NAD-binding domain
PF16206	2	C-terminal region of Mon2 protein
PF02525	2	Flavodoxin-like fold
PF04677	2	Protein similar to CwfJ C-terminus 1
PF16183	2	Kinesin-associated
PF13673	2	Acetyltransferase (GNAT) domain
PF01086	2	Clathrin light chain
PF16353	2	Domain of unknown function(DUF4981)
PF13419	2	Haloacid dehalogenase-like hydrolase
PF12473	2	Kinesin protein
PF09925	2	Predicted membrane protein (DUF2157)
PF17216	2	Rrp44-like cold shock domain
PF00834	2	Ribulose-phosphate 3 epimerase family
PF00708	2	Acylphosphatase
PF00730	2	HhH-GPD superfamily base excision DNA repair protein
PF00366	2	Ribosomal protein S17
PF13851	2	Growth-arrest specific micro-tubule binding
PF08623	2	TATA-binding protein interacting (TIP20)
PF01210	2	NAD-dependent glycerol-3-phosphate dehydrogenase N-terminus
PF01557	2	Fumarylacetoacetate (FAA) hydrolase family
PF06470	2	SMC proteins Flexible Hinge Domain
PF01875	2	Memo-like protein
PF04061	2	ORMDL family
PF02213	2	GYF domain
PF16892	2	Chitin biosynthesis protein CHS5 N-terminus
PF11704	2	Vesicle coat protein involved in Golgi to plasma membrane transport
PF08534	2	Redoxin
PF10369	2	Small subunit of acetolactate synthase
PF01777	2	Ribosomal L27e protein family
PF16589	2	BRCT domain, a BRCA1 C-terminus domain
PF03371	2	PRP38 family
PF08603	2	Adenylate cyclase associated (CAP) C terminal
PF02929	2	Beta galactosidase small chain
PF07719	2	Tetratricopeptide repeat
PF17146	2	PIN domain of ribonuclease
PF04140	2	Isoprenylcysteine carboxyl methyltransferase (ICMT) family
PF00281	2	Ribosomal protein L5
PF02064	2	MAS20 protein import receptor
PF00687	2	Ribosomal protein L1p/L10e family
PF00585	2	C-terminal regulatory domain of Threonine dehydratase
PF08799	2	pre-mRNA processing factor 4 (PRP4) like
PF09769	2	Apolipoprotein O
PF03911	2	Sec61beta family
PF00237	2	Ribosomal protein L22p/L17e
PF04194	2	Programmed cell death protein 2, C-terminal putative domain
PF04366	2	Las17-binding protein actin regulator
PF03764	2	Elongation factor G, domain IV
PF00584	2	SecE/Sec61-gamma subunits of protein translocation complex
PF16879	2	C-terminal domain of Sin3a protein
PF01991	2	ATP synthase (E/31 kDa) subunit
PF02045	2	CCAAT-binding transcription factor (CBF-B/NF-YA) subunit B
PF07986	2	Tubulin binding cofactor C
PF08569	2	Mo25-like
PF13439	2	Glycosyltransferase Family 4
PF04857	2	CAF1 family ribonuclease
PF00209	2	Sodium:neurotransmitter symporter family
PF07470	2	Glycosyl Hydrolase Family 88
PF00312	2	Ribosomal protein S15
PF03126	2	Plus-3 domain
PF16897	2	C-terminal region of MMR_HSR1 domain
PF04054	2	CCR4-Not complex component, Not1
PF16909	2	Vacuolar-sorting-associated 13 protein C-terminal
PF14619	2	Snf2-ATP coupling, chromatin remodelling complex
PF10255	2	RNA polymerase I-associated factor PAF67
PF10397	2	Adenylosuccinate lyase C-terminus
PF10351	2	Golgi-body localisation protein domain
PF00218	2	Indole-3-glycerol phosphate synthase
PF08587	2	Ubiquitin associated domain (UBA)
PF04733	2	Coatomer epsilon subunit
PF10257	2	Retinoic acid induced 16-like protein
PF09324	2	Domain of unknown function (DUF1981)
PF04046	2	PSP
PF01740	2	STAS domain
PF11816	2	Domain of unknown function (DUF3337)
PF13917	2	Zinc knuckle
PF11698	2	V-ATPase subunit H
PF04082	2	Fungal specific transcription factor domain
PF01465	2	GRIP domain
PF08920	2	Splicing factor 3B subunit 1
PF00380	2	Ribosomal protein S9/S16
PF04615	2	Utp14 protein
PF05983	2	MED7 protein
PF02910	2	Fumarate reductase flavoprotein C-term
PF01247	2	Ribosomal protein L35Ae
PF00795	2	Carbon-nitrogen hydrolase
PF07743	2	HSCB C-terminal oligomerisation domain
PF04178	2	Got1/Sft2-like family
PF04557	2	Glutaminyl-tRNA synthetase, non-specific RNA binding region part 2
PF03095	2	Phosphotyrosyl phosphate activator (PTPA) protein
PF08144	2	CPL (NUC119) domain
PF15985	2	KH domain
PF12717	2	non-SMC mitotic condensation complex subunit 1
PF09726	2	Macoilin family
PF08752	2	Coatomer gamma subunit appendage platform subdomain
PF14382	2	Exosome complex exonuclease RRP4 N-terminal region
PF02089	2	Palmitoyl protein thioesterase
PF08490	2	Domain of unknown function (DUF1744)
PF08628	2	Sorting nexin C terminal
PF00290	2	Tryptophan synthase alpha chain
PF01713	2	Smr domain
PF09333	2	Autophagy-related protein C terminal domain
PF01256	2	Carbohydrate kinase
PF00416	2	Ribosomal protein S13/S18
PF04641	2	Rtf2 RING-finger
PF08784	2	Replication protein A C terminal
PF08385	2	Dynein heavy chain, N-terminal region 1
PF00728	2	Glycosyl hydrolase family 20, catalytic domain
PF01233	2	Myristoyl-CoA:protein N-myristoyltransferase, N-terminal domain
PF10366	2	Vacuolar sorting protein 39 domain 1
PF00854	2	POT family
PF04130	2	Spc97 / Spc98 family
PF14633	2	SH2 domain
PF06699	2	GPI biosynthesis protein family Pig-F
PF09454	2	Vps23 core domain
PF04931	2	DNA polymerase phi
PF03484	2	tRNA synthetase B5 domain
PF03271	2	EB1-like C-terminal motif
PF02990	2	Endomembrane protein 70
PF09797	2	N-acetyltransferase B complex (NatB) non catalytic subunit
PF02782	2	FGGY family of carbohydrate kinases, C-terminal domain
PF00648	2	Calpain family cysteine protease
PF02403	2	Seryl-tRNA synthetase N-terminal domain
PF02671	2	Paired amphipathic helix repeat
PF02913	2	FAD linked oxidases, C-terminal domain
PF04096	2	Nucleoporin autopeptidase
PF14249	2	Tocopherol cyclase
PF03451	2	HELP motif
PF01894	2	Uncharacterised protein family UPF0047
PF00385	2	Chromo (CHRromatin Organisation MOdifier) domain
PF03399	2	SAC3/GANP family
PF04997	2	RNA polymerase Rpb1, domain 1
PF04180	2	Low temperature viability protein
PF03813	2	Nrap protein domain 1
PF01223	2	DNA/RNA non-specific endonuclease
PF16205	2	Ribosomal_S17 N-terminal
PF02221	2	ML domain
PF06395	2	CDC24 Calponin
PF10587	2	Eukaryotic elongation factor 1 beta central acidic region
PF05822	2	Pyrimidine 5'-nucleotidase (UMPH-1)
PF07994	2	Myo-inositol-1-phosphate synthase
PF10602	2	26S proteasome subunit RPN7
PF01159	2	Ribosomal protein L6e
PF13430	2	Domain of unknown function (DUF4112)
PF02894	2	Oxidoreductase family, C-terminal alpha/beta domain
PF00644	2	Poly(ADP-ribose) polymerase catalytic domain
PF16211	2	C-terminus of histone H2A
PF15239	2	Domain of unknown function (DUF4586)
PF03946	2	Ribosomal protein L11, N-terminal domain
PF14523	2	Syntaxin-like protein
PF04874	2	Mak16 protein C-terminal region
PF05817	2	Oligosaccharyltransferase subunit Ribophorin II
PF07651	2	ANTH domain
PF04064	2	Domain of unknown function (DUF384)
PF08542	2	Replication factor C C-terminal domain
PF10310	2	Family of unknown function (DUF5427)
PF01808	2	AICARFT/IMPCHase bienzyme
PF12838	2	4Fe-4S dicluster domain
PF05965	2	F/Y rich C-terminus
PF14520	2	Helix-hairpin-helix domain
PF01841	2	Transglutaminase-like superfamily
PF02275	2	Linear amide C-N hydrolases, choloylglycine hydrolase family
PF03208	2	PRA1 family protein
PF14740	2	Domain of unknown function (DUF4471)
PF03152	2	Ubiquitin fusion degradation protein UFD1
PF04051	2	Transport protein particle (TRAPP) component
PF10455	2	Bin/amphiphysin/Rvs domain for vesicular trafficking
PF00935	2	Ribosomal protein L44
PF07718	2	Coatomer beta C-terminal region
PF14666	2	Rapamycin-insensitive companion of mTOR, middle domain
PF08267	2	Cobalamin-independent synthase, N-terminal domain
PF03074	2	Glutamate-cysteine ligase
PF16579	2	Adenylate sensor of SNF1-like protein kinase
PF04950	2	40S ribosome biogenesis protein Tsr1 and BMS1 C-terminal
PF13287	2	Fn3 associated
PF01183	2	Glycosyl hydrolases family 25
PF03194	2	LUC7 N_terminus
PF10198	2	Histone acetyltransferases subunit 3
PF04088	2	Peroxin 13, N-terminal region
PF04597	2	Ribophorin I
PF02880	2	Phosphoglucomutase/phosphomannomutase, alpha/beta/alpha domain III
PF01266	2	FAD dependent oxidoreductase
PF16415	2	CCR4-NOT transcription complex subunit 1 CAF1-binding domain
PF00043	2	Glutathione S-transferase, C-terminal domain
PF15901	2	Sortilin, neurotensin receptor 3, C-terminal
PF11831	2	pre-mRNA splicing factor component
PF04189	2	Gcd10p family
PF01118	2	Semialdehyde dehydrogenase, NAD binding domain
PF01751	2	Toprim domain
PF04558	2	Glutaminyl-tRNA synthetase, non-specific RNA binding region part 1
PF10559	2	Plug domain of Sec61p
PF17102	2	Stealth protein CR3, conserved region 3
PF09320	2	Domain of unknown function (DUF1977)
PF09423	2	PhoD-like phosphatase
PF00294	2	pfkB family carbohydrate kinase
PF01599	2	Ribosomal protein S27a
PF01169	2	Uncharacterized protein family UPF0016
PF13870	2	Domain of unknown function (DUF4201)
PF10428	2	RAM signalling pathway protein
PF07228	2	Stage II sporulation protein E (SpoIIE)
PF13838	2	Clathrin-H-link
PF12999	2	Glucosidase II beta subunit-like
PF05255	2	Uncharacterised protein family (UPF0220)
PF03465	2	eRF1 domain 3
PF05348	2	Proteasome maturation factor UMP1
PF08588	2	Protein of unknown function (DUF1769)
PF13243	2	Squalene-hopene cyclase C-terminal domain
PF00347	2	Ribosomal protein L6
PF03178	2	CPSF A subunit region
PF08606	2	Prp19/Pso4-like
PF16172	2	DOCK N-terminus
PF11262	2	Transcription factor/nuclear export subunit protein 2
PF10629	2	Protein of unknown function (DUF2475)
PF17284	2	Spermidine synthase tetramerisation domain
PF06201	2	PITH domain
PF13696	2	Zinc knuckle
PF00075	2	RNase H
PF06472	2	ABC transporter transmembrane region 2
PF03378	2	CAS/CSE protein, C-terminus
PF01512	2	Respiratory-chain NADH dehydrogenase 51 Kd subunit
PF05964	2	F/Y-rich N-terminus
PF03876	2	SHS2 domain found in N terminus of Rpb7p/Rpc25p/MJ0397
PF12110	2	Nuclear protein 96
PF02194	2	PXA domain
PF00612	2	IQ calmodulin-binding motif
PF09066	2	Beta2-adaptin appendage, C-terminal sub-domain
PF04614	2	Pex19 protein family
PF14538	2	Raptor N-terminal CASPase like domain
PF03423	2	Carbohydrate binding domain (family 25)
PF12070	2	Protein SCAI
PF07039	2	SGF29 tudor-like domain
PF08244	2	Glycosyl hydrolases family 32 C terminal
PF00162	2	Phosphoglycerate kinase
PF00659	2	POLO box duplicated region
PF08159	2	NUC153 domain
PF13879	2	KIAA1430 homologue
PF14701	2	Glycogen debranching enzyme, glucanotransferase domain
PF16297	2	Domain of unknown function (DUF4939)
PF04851	2	Type III restriction enzyme, res subunit
PF13249	2	Squalene-hopene cyclase N-terminal domain
PF02984	2	Cyclin, C-terminal domain
PF16470	2	Peptidase S8 pro-domain
PF05994	2	Cytoplasmic Fragile-X interacting family
PF03828	2	Cid1 family poly A polymerase
PF01937	2	Protein of unknown function DUF89
PF01832	2	Mannosyl-glycoprotein endo-beta-N-acetylglucosaminidase
PF00327	2	Ribosomal protein L30p/L7e
PF02230	2	Phospholipase/Carboxylesterase
PF00121	2	Triosephosphate isomerase
PF01121	2	Dephospho-CoA kinase
PF00408	2	Phosphoglucomutase/phosphomannomutase, C-terminal domain
PF09268	2	Clathrin, heavy-chain linker
PF17389	2	Bacterial alpha-L-rhamnosidase 6 hairpin glycosidase domain
PF13908	2	Wnt and FGF inhibitory regulator
PF06325	2	Ribosomal protein L11 methyltransferase (PrmA)
PF00255	2	Glutathione peroxidase
PF01781	2	Ribosomal L38e protein family
PF13015	2	Glucosidase II beta subunit-like protein
PF09446	2	VMA21-like domain
PF00072	2	Response regulator receiver domain
PF05327	2	RNA polymerase I specific transcription initiation factor RRN3
PF09451	2	Autophagy-related protein 27
PF01741	2	Large-conductance mechanosensitive channel, MscL
PF00849	2	RNA pseudouridylate synthase
PF00081	2	Iron/manganese superoxide dismutases, alpha-hairpin domain
PF01229	2	Glycosyl hydrolases family 39
PF07004	2	Sperm-tail PG-rich repeat
PF01088	2	Ubiquitin carboxyl-terminal hydrolase, family 1
PF03061	2	Thioesterase superfamily
PF04699	2	ARP2/3 complex 16 kDa subunit (p16-Arc)
PF00551	2	Formyl transferase
PF01627	2	Hpt domain
PF01661	2	Macro domain
PF01257	2	Thioredoxin-like [2Fe-2S] ferredoxin
PF09334	2	tRNA synthetases class I (M)
PF01644	2	Chitin synthase
PF03248	2	Rer1 family
PF07541	2	Eukaryotic translation initiation factor 2 alpha subunit
PF00458	2	WHEP-TRS domain
PF04893	2	Yip1 domain
PF16213	2	Dimerisation and cyclophilin-binding domain of Mon2
PF08029	2	HisG, C-terminal domain
PF02538	2	Hydantoinase B/oxoprolinase
PF08565	2	Cdc37 Hsp90 binding domain
PF04791	2	LMBR1-like membrane protein
PF03343	2	SART-1 family
PF15365	2	Proline-rich nuclear receptor coactivator motif
PF08544	2	GHMP kinases C terminal
PF04683	2	Proteasome complex subunit Rpn13 ubiquitin receptor
PF04265	2	Thiamin pyrophosphokinase, vitamin B1 binding domain
PF01131	2	DNA topoisomerase
PF16653	2	Saccharopine dehydrogenase C-terminal domain
PF13890	2	Rab3 GTPase-activating protein catalytic subunit
PF00342	2	Phosphoglucose isomerase
PF00977	2	Histidine biosynthesis protein
PF14681	2	Uracil phosphoribosyltransferase
PF04855	2	SNF5 / SMARCB1 / INI1
PF04511	2	Der1-like family
PF08152	2	GUCT (NUC152) domain
PF00344	2	SecY translocase
PF08840	2	BAAT / Acyl-CoA thioester hydrolase C terminal
PF01042	2	Endoribonuclease L-PSP
PF04777	2	Erv1 / Alr family
PF02724	2	CDC45-like protein
PF00549	2	CoA-ligase
PF02885	2	Glycosyl transferase family, helical bundle domain
PF14945	2	Normal lung function maintenance, Low in Lung Cancer 1 protein
PF10588	2	NADH-ubiquinone oxidoreductase-G iron-sulfur binding region
PF14381	2	Ethylene-responsive protein kinase Le-CTR1
PF03151	2	Triose-phosphate Transporter family
PF10405	2	Rad4 beta-hairpin domain 3
PF17039	2	Fucosyltransferase, N-terminal
PF06246	2	Isy1-like splicing family
PF12752	2	SUZ domain
PF00673	2	ribosomal L5P family C-terminus
PF12807	2	Translation initiation factor eIF3 subunit 135
PF06703	2	Microsomal signal peptidase 25 kDa subunit (SPC25)
PF08271	2	TFIIB zinc-binding
PF14821	2	Threonine synthase N terminus
PF08423	2	Rad51
PF11919	2	Domain of unknown function (DUF3437)
PF07393	2	Exocyst complex component Sec10
PF09802	2	Preprotein translocase subunit Sec66
PF02879	2	Phosphoglucomutase/phosphomannomutase, alpha/beta/alpha domain II
PF16558	2	Amino-terminal Zinc-binding domain of ubiquitin ligase E3A
PF00497	2	Bacterial extracellular solute-binding proteins, family 3
PF07202	2	T-complex protein 10 C-terminus
PF14378	2	PAP2 superfamily
PF14853	2	Fis1 C-terminal tetratricopeptide repeat
PF14908	2	Domain of unknown function (DUF4496)
PF15410	2	Pleckstrin homology domain
PF01039	2	Carboxyl transferase domain
PF06968	2	Biotin and Thiamin Synthesis associated domain
PF03464	2	eRF1 domain 2
PF04968	2	CHORD
PF04695	2	Peroxisomal membrane anchor protein (Pex14p) conserved region
PF05840	2	Bacteriophage replication gene A protein (GPA)
PF00036	2	EF hand
PF05057	2	Putative serine esterase (DUF676)
PF07264	2	Etoposide-induced protein 2.4 (EI24)
PF13561	2	Enoyl-(Acyl carrier protein) reductase
PF04670	2	Gtr1/RagA G protein conserved region
PF00667	2	FAD binding domain
PF12689	2	Acid Phosphatase
PF02769	2	AIR synthase related protein, C-terminal domain
PF12821	2	Threonine/Serine exporter, ThrE
PF04495	2	GRASP55/65 PDZ-like domain
PF03607	2	Doublecortin
PF04450	2	Peptidase of plants and bacteria
PF00189	2	Ribosomal protein S3, C-terminal domain
PF08148	2	DSHCT (NUC185) domain
PF08701	2	GNL3L/Grn1 putative GTPase
PF00370	2	FGGY family of carbohydrate kinases, N-terminal domain
PF17171	2	Glutathione S-transferase, C-terminal domain
PF02463	2	RecF/RecN/SMC N terminal domain
PF00276	2	Ribosomal protein L23
PF14702	2	Central domain of human glycogen debranching enzyme
PF08059	2	SEP domain
PF14114	2	Domain of unknown function (DUF4286)
PF00719	2	Inorganic pyrophosphatase
PF04063	2	Domain of unknown function (DUF383)
PF06071	2	Protein of unknown function (DUF933)
PF00521	2	DNA gyrase/topoisomerase IV, subunit A
PF01817	2	Chorismate mutase type II
PF14273	2	Domain of unknown function (DUF4360)
PF01380	2	SIS domain
PF17104	2	Domain of unknown function (DUF5102)
PF11718	2	Pre-mRNA 3'-end-processing endonuclease polyadenylation factor C-term
PF01547	2	Bacterial extracellular solute-binding protein
PF08235	2	LNS2 (Lipin/Ned1/Smp2)
PF04900	2	Fcf1
PF13234	2	rRNA-processing arch domain
PF03914	2	CBF/Mak21 family
PF04774	2	Hyaluronan / mRNA binding family
PF01758	2	Sodium Bile acid symporter family
PF06418	2	CTP synthase N-terminus
PF03839	2	Translocation protein Sec62
PF03104	2	DNA polymerase family B, exonuclease domain
PF01408	2	Oxidoreductase family, NAD-binding Rossmann fold
PF10433	2	Mono-functional DNA-alkylating methyl methanesulfonate N-term
PF16189	2	Creatinase/Prolidase N-terminal domain
PF01467	2	Cytidylyltransferase-like
PF00145	2	C-5 cytosine-specific DNA methylase
PF03223	2	V-ATPase subunit C
PF00833	2	Ribosomal S17
PF15967	2	Nucleoporin FG repeated region
PF01115	2	F-actin capping protein, beta subunit
PF07946	2	Protein of unknown function (DUF1682)
PF01321	2	Creatinase/Prolidase N-terminal domain
PF16190	2	Ubiquitin-activating enzyme E1 FCCH domain
PF04172	2	LrgB-like family
PF08375	2	Proteasome regulatory subunit C-terminal
PF00136	2	DNA polymerase family B
PF09079	2	CDC6, C terminal winged helix domain
PF02374	2	Anion-transporting ATPase
PF07491	2	Protein phosphatase inhibitor
PF10358	2	N-terminal C2 in EEIG1 and EHBP1 proteins
PF00958	2	GMP synthase C terminal domain
PF00203	2	Ribosomal protein S19
PF02150	2	RNA polymerases M/15 Kd subunit
PF02296	2	Alpha adaptin AP2, C-terminal domain
PF00387	2	Phosphatidylinositol-specific phospholipase C, Y domain
PF11864	2	Domain of unknown function (DUF3384)
PF01871	2	AMMECR1
PF07479	2	NAD-dependent glycerol-3-phosphate dehydrogenase C-terminus
PF14492	2	Elongation Factor G, domain II
PF06957	2	Coatomer (COPI) alpha subunit C-terminus
PF13517	2	Repeat domain in Vibrio, Colwellia, Bradyrhizobium and Shewanella
PF05063	2	MT-A70
PF16652	2	Pleckstrin homology domain
PF13718	2	GNAT acetyltransferase 2
PF05742	2	Transport and Golgi organisation 2
PF00186	2	Dihydrofolate reductase
PF08559	2	Cut8, nuclear proteasome tether protein
PF14770	2	Transmembrane protein 18
PF04880	2	NUDE protein, C-terminal conserved region
PF08543	2	Phosphomethylpyrimidine kinase
PF10498	2	Intra-flagellar transport protein 57
PF03226	2	Yippee zinc-binding/DNA-binding /Mis18, centromere assembly
PF13405	2	EF-hand domain
PF09793	2	Anticodon-binding domain
PF08564	2	Cdc37 C terminal domain
PF02256	2	Iron hydrogenase small subunit
PF01268	2	Formate--tetrahydrofolate ligase
PF09280	2	XPC-binding domain
PF02882	2	Tetrahydrofolate dehydrogenase/cyclohydrolase, NAD(P)-binding domain
PF00920	2	Dehydratase family
PF00298	2	Ribosomal protein L11, RNA binding domain
PF16550	2	UCH-binding domain
PF00763	2	Tetrahydrofolate dehydrogenase/cyclohydrolase, catalytic domain
PF11789	2	Zinc-finger of the MIZ type in Nse subunit
PF11069	2	Protein of unknown function (DUF2870)
PF03330	2	Lytic transglycolase
PF01592	2	NifU-like N terminal domain
PF16746	2	BAR domain of APPL family
PF04000	2	Sas10/Utp3/C1D family
PF05670	2	Domain of unknown function (DUF814)
PF13236	2	Clustered mitochondria
PF09770	2	Topoisomerase II-associated protein PAT1
PF01171	2	PP-loop family
PF00781	2	Diacylglycerol kinase catalytic domain
PF05127	2	Helicase
PF01227	2	GTP cyclohydrolase I
PF07366	2	SnoaL-like polyketide cyclase
PF12955	2	Domain of unknown function (DUF3844)
PF16381	2	Coatomer subunit gamma-1 C-terminal appendage platform
PF13508	2	Acetyltransferase (GNAT) domain
PF00375	2	Sodium:dicarboxylate symporter family
PF14599	2	Zinc-ribbon
PF01872	2	RibD C-terminal domain
PF04230	2	Polysaccharide pyruvyl transferase
PF01992	2	ATP synthase (C/AC39) subunit
PF00383	2	Cytidine and deoxycytidylate deaminase zinc-binding region
PF01866	2	Putative diphthamide synthesis protein
PF14663	2	Rapamycin-insensitive companion of mTOR RasGEF_N domain
PF00252	2	Ribosomal protein L16p/L10e
PF00860	2	Permease family
PF00245	2	Alkaline phosphatase
PF03868	2	Ribosomal protein L6, N-terminal domain
PF02201	2	SWIB/MDM2 domain
PF10589	2	NADH-ubiquinone oxidoreductase-F iron-sulfur binding region
PF04871	2	Uso1 / p115 like vesicle tethering protein, C terminal region
PF03986	2	Autophagocytosis associated protein (Atg3), N-terminal domain
PF01485	2	IBR domain, a half RING-finger domain
PF13336	2	Acetyl-CoA hydrolase/transferase C-terminal domain
PF01655	2	Ribosomal protein L32
PF00318	2	Ribosomal protein S2
PF00962	2	Adenosine/AMP deaminase
PF04573	2	Signal peptidase subunit
PF01393	2	Chromo shadow domain
PF14852	2	Fis1 N-terminal tetratricopeptide repeat
PF12066	2	Domain of unknown function (DUF3546)
PF00097	2	Zinc finger, C3HC4 type (RING finger)
PF00703	2	Glycosyl hydrolases family 2
PF03124	2	EXS family
PF07774	2	Protein of unknown function (DUF1620)
PF01112	2	Asparaginase
PF04176	2	TIP41-like family
PF03878	2	YIF1
PF01148	2	Cytidylyltransferase family
PF04652	2	Vta1 like
PF10404	2	Rad4 beta-hairpin domain 2
PF00591	2	Glycosyl transferase family, a/b domain
PF01253	2	Translation initiation factor SUI1
PF13844	2	Glycosyl transferase family 41
PF01092	2	Ribosomal protein S6e
PF05783	2	Dynein light intermediate chain (DLIC)
PF03908	1	Sec20
PF05362	1	Lon protease (S16) C-terminal proteolytic domain
PF02445	1	Quinolinate synthetase A protein
PF00164	1	Ribosomal protein S12/S23
PF10447	1	Exosome component EXOSC1/CSL4
PF01264	1	Chorismate synthase
PF03167	1	Uracil DNA glycosylase superfamily
PF13899	1	Thioredoxin-like
PF05206	1	Methyltransferase TRM13
PF02219	1	Methylenetetrahydrofolate reductase
PF11817	1	Foie gras liver health family 1
PF02137	1	Adenosine-deaminase (editase) domain
PF08320	1	PIG-X / PBN1
PF08645	1	Polynucleotide kinase 3 phosphatase
PF01956	1	Integral membrane protein DUF106
PF04571	1	lipin, N-terminal conserved region
PF00289	1	Biotin carboxylase, N-terminal domain
PF10334	1	Aromatic acid exporter family member 2
PF09995	1	Uncharacterized protein conserved in bacteria (DUF2236)
PF03501	1	Plectin/S10 domain
PF14244	1	gag-polypeptide of LTR copia-type
PF00750	1	tRNA synthetases class I (R)
PF09404	1	Eukaryotic protein of unknown function (DUF2003)
PF06012	1	Domain of Unknown Function (DUF908)
PF14698	1	Argininosuccinate lyase C-terminal
PF10596	1	U6-snRNA interacting domain of PrP8
PF01300	1	Telomere recombination
PF05026	1	Dcp2, box A domain
PF06159	1	Protein of unknown function (DUF974)
PF03164	1	Trafficking protein Mon1
PF04004	1	Leo1-like protein
PF00581	1	Rhodanese-like domain
PF04003	1	Dip2/Utp12 Family
PF06046	1	Exocyst complex component Sec6
PF01846	1	FF domain
PF14935	1	Transmembrane protein 138
PF07923	1	N1221-like protein
PF03987	1	Autophagocytosis associated protein, active-site domain
PF00919	1	Uncharacterized protein family UPF0004
PF07779	1	10 TM Acyl Transferase domain found in Cas1p
PF13019	1	Telomere stability and silencing
PF13380	1	CoA binding domain
PF01990	1	ATP synthase (F/14-kDa) subunit
PF13429	1	Tetratricopeptide repeat
PF16294	1	RNSP1-SAP18 binding (RSB) motif
PF05602	1	Cleft lip and palate transmembrane protein 1 (CLPTM1)
PF03690	1	Uncharacterised protein family (UPF0160)
PF13768	1	von Willebrand factor type A domain
PF08507	1	COPI associated protein
PF09261	1	Alpha mannosidase middle domain
PF05378	1	Hydantoinase/oxoprolinase N-terminal region
PF15370	1	Domain of unknown function (DUF4598)
PF05023	1	Phytochelatin synthase
PF11708	1	Pre-mRNA splicing Prp18-interacting factor
PF00275	1	EPSP synthase (3-phosphoshikimate 1-carboxyvinyltransferase)
PF02338	1	OTU-like cysteine protease
PF02747	1	Proliferating cell nuclear antigen, C-terminal domain
PF16457	1	Pleckstrin homology domain
PF01471	1	Putative peptidoglycan binding domain
PF08670	1	MEKHLA domain
PF04377	1	Arginine-tRNA-protein transferase, C terminus
PF06025	1	Domain of Unknown Function (DUF913)
PF13520	1	Amino acid permease
PF07508	1	Recombinase
PF08142	1	AARP2CN (NUC121) domain
PF07019	1	Rab5-interacting protein (Rab5ip)
PF07713	1	Protein of unknown function (DUF1604)
PF01199	1	Ribosomal protein L34e
PF00238	1	Ribosomal protein L14p/L23e
PF10235	1	Microtubule-associated protein CRIPT
PF01544	1	CorA-like Mg2+ transporter protein
PF11312	1	Putative SAM-dependent methyltransferase
PF06769	1	YoeB-like toxin of bacterial type II toxin-antitoxin system
PF10243	1	Microtubule-binding protein MIP-T3
PF02260	1	FATC domain
PF10176	1	Protein of unknown function (DUF2370)
PF10261	1	Inositol phospholipid synthesis and fat-storage-inducing TM
PF08164	1	Apoptosis-antagonizing transcription factor, C-terminal
PF04133	1	Vacuolar protein sorting 55
PF08969	1	USP8 dimerisation domain
PF17286	1	PRMT5 oligomerisation domain
PF14225	1	Cell morphogenesis C-terminal
PF09830	1	ATP adenylyltransferase
PF07064	1	RIC1
PF02749	1	Quinolinate phosphoribosyl transferase, N-terminal domain
PF08531	1	Alpha-L-rhamnosidase N-terminal domain
PF04086	1	Signal recognition particle, alpha subunit, N-terminal
PF08581	1	Tup N-terminal
PF11841	1	Domain of unknown function (DUF3361)
PF06991	1	Microfibril-associated/Pre-mRNA processing
PF09414	1	RNA ligase
PF08598	1	Sds3-like
PF03874	1	RNA polymerase Rpb4
PF01280	1	Ribosomal protein L19e
PF16418	1	CCR4-NOT transcription complex subunit 1 HEAT repeat
PF16916	1	Dimerisation domain of Zinc Transporter
PF08170	1	POPLD (NUC188) domain
PF10469	1	AKAP7 2'5' RNA ligase-like domain
PF04032	1	RNAse P Rpr2/Rpp21/SNM1 subunit domain
PF04062	1	ARP2/3 complex ARPC3 (21 kDa) subunit
PF08149	1	BING4CT (NUC141) domain
PF09511	1	RNA ligase
PF12619	1	Mini-chromosome maintenance protein 2
PF13476	1	AAA domain
PF15907	1	Integrin-alpha FG-GAP repeat-containing protein 2
PF08700	1	Vps51/Vps67
PF01784	1	NIF3 (NGG1p interacting factor 3)
PF02186	1	TFIIE beta subunit core domain
PF09734	1	RNA polymerase III transcription factor (TF)IIIC subunit
PF02357	1	Transcription termination factor nusG
PF14370	1	C-terminal topoisomerase domain
PF10230	1	Lipid-droplet associated hydrolase
PF03540	1	Transcription initiation factor TFIID 23-30kDa subunit
PF00572	1	Ribosomal protein L13
PF01137	1	RNA 3'-terminal phosphate cyclase
PF01025	1	GrpE
PF09440	1	eIF3 subunit 6 N terminal domain
PF16188	1	C-terminal region of peptidase_M24
PF17172	1	Glutathione S-transferase N-terminal domain
PF01896	1	DNA primase small subunit
PF00697	1	N-(5'phosphoribosyl)anthranilate (PRA) isomerase
PF10312	1	Conserved mid region of cactin
PF07382	1	Histone H1-like nucleoprotein HC2
PF10237	1	Probable N6-adenine methyltransferase
PF04889	1	Cwf15/Cwc15 cell cycle control protein
PF04739	1	5'-AMP-activated protein kinase beta subunit, interaction domain
PF13902	1	R3H-associated N-terminal domain
PF00244	1	14-3-3 protein
PF04762	1	IKI3 family
PF08610	1	Peroxisomal membrane protein (Pex16)
PF11942	1	Spt5 transcription elongation factor, acidic N-terminal
PF08771	1	FKBP12-rapamycin binding domain
PF09766	1	Fms-interacting protein
PF07975	1	TFIIH C1-like domain
PF02735	1	Ku70/Ku80 beta-barrel domain
PF10537	1	ATP-utilising chromatin assembly and remodelling N-terminal
PF14560	1	Ubiquitin-like domain
PF07757	1	Predicted AdoMet-dependent methyltransferase
PF04158	1	Sof1-like domain
PF08327	1	Activator of Hsp90 ATPase homolog 1-like protein
PF02970	1	Tubulin binding cofactor A
PF00590	1	Tetrapyrrole (Corrin/Porphyrin) Methylases
PF11712	1	Endoplasmic reticulum-based factor for assembly of V-ATPase
PF05236	1	Transcription initiation factor TFIID component TAF4 family
PF08285	1	Dolichol-phosphate mannosyltransferase subunit 3 (DPM3)
PF16511	1	N-terminal or F0 domain of Talin-head FERM
PF11969	1	Scavenger mRNA decapping enzyme C-term binding
PF01912	1	eIF-6 family
PF17405	1	Nrap protein nucleotidyltransferase domain 4
PF03081	1	Exo70 exocyst complex subunit
PF02933	1	Cell division protein 48 (CDC48), domain 2
PF13401	1	AAA domain
PF12519	1	Mitochondrial distribution and morphology protein 10
PF12253	1	Chromatin assembly factor 1 subunit A
PF13725	1	Possible tRNA binding domain
PF01187	1	Macrophage migration inhibitory factor (MIF)
PF02843	1	Phosphoribosylglycinamide synthetase, C domain
PF16884	1	N-terminal domain of oxidoreductase
PF02291	1	Transcription initiation factor IID, 31kD subunit
PF14791	1	DNA polymerase beta thumb
PF06398	1	Integral peroxisomal membrane peroxin
PF13589	1	Histidine kinase-, DNA gyrase B-, and HSP90-like ATPase
PF00827	1	Ribosomal L15
PF13373	1	DUF2407 C-terminal domain
PF08324	1	PUL domain
PF14857	1	TMEM151 family
PF07919	1	Gryzun, putative trafficking through Golgi
PF04729	1	ASF1 like histone chaperone
PF04928	1	Poly(A) polymerase central domain
PF08314	1	Secretory pathway protein Sec39
PF07890	1	Rrp15p
PF02759	1	RUN domain
PF01284	1	Membrane-associating domain
PF01987	1	Mitochondrial biogenesis AIM24
PF13912	1	C2H2-type zinc finger
PF01204	1	Trehalase
PF08303	1	tRNA ligase kinase domain
PF17390	1	Bacterial alpha-L-rhamnosidase C-terminal domain
PF08597	1	Translation initiation factor eIF3 subunit
PF00884	1	Sulfatase
PF12455	1	Dynein associated protein
PF01693	1	Caulimovirus viroplasmin
PF17292	1	POB3-like N-terminal PH domain
PF13862	1	p21-C-terminal region-binding protein
PF01853	1	MOZ/SAS family
PF05856	1	ARP2/3 complex 20 kDa subunit (ARPC4)
PF13177	1	DNA polymerase III, delta subunit
PF04981	1	NMD3 family
PF09683	1	Bacteriocin (Lactococcin_972)
PF00488	1	MutS domain V
PF07933	1	Protein of unknown function (DUF1681)
PF10275	1	Peptidase C65 Otubain
PF00814	1	Glycoprotease family
PF08231	1	SYF2 splicing factor
PF08146	1	BP28CT (NUC211) domain
PF04113	1	Gpi16 subunit, GPI transamidase component
PF01028	1	Eukaryotic DNA topoisomerase I, catalytic core
PF16573	1	N-terminal beta-sandwich domain of polyadenylation factor
PF02698	1	DUF218 domain
PF09223	1	ZinT (YodA) periplasmic lipocalin-like zinc-recruitment
PF04886	1	PT repeat
PF07081	1	Protein of unknown function (DUF1349)
PF01536	1	Adenosylmethionine decarboxylase
PF02915	1	Rubrerythrin
PF12002	1	MgsA AAA+ ATPase C terminal
PF06732	1	Pescadillo N-terminus
PF11916	1	Vacuolar protein 14 C-terminal Fig4p binding
PF03825	1	Nucleoside H+ symporter
PF10357	1	Domain of Kin17 curved DNA-binding protein
PF10391	1	Fingers domain of DNA polymerase lambda
PF02995	1	Protein of unknown function (DUF229)
PF07571	1	TAF6 C-terminal HEAT repeat domain
PF10021	1	Uncharacterized protein conserved in bacteria (DUF2263)
PF05285	1	SDA1
PF11732	1	Transcription- and export-related complex subunit
PF16483	1	Beta-1,3-glucanase
PF05620	1	Protein of unknown function (DUF788)
PF14996	1	Retinal Maintenance
PF01168	1	Alanine racemase, N-terminal domain
PF05903	1	PPPDE putative peptidase domain
PF02792	1	Mago nashi protein
PF00732	1	GMC oxidoreductase
PF05625	1	PAXNEB protein
PF16203	1	ERCC3/RAD25/XPB C-terminal helicase
PF05603	1	Protein of unknown function (DUF775)
PF08514	1	STAG domain
PF06294	1	CH-like domain in sperm protein
PF16199	1	Radical_SAM C-terminal domain
PF03398	1	Regulator of Vps4 activity in the MVB pathway
PF08519	1	Replication factor RFC1 C terminal domain
PF10598	1	RNA recognition motif of the spliceosomal PrP8
PF01103	1	Surface antigen
PF04008	1	Adenosine specific kinase
PF04921	1	XAP5, circadian clock regulator
PF01073	1	3-beta hydroxysteroid dehydrogenase/isomerase family
PF08996	1	DNA Polymerase alpha zinc finger
PF01191	1	RNA polymerase Rpb5, C-terminal domain
PF12589	1	Methyltransferase involved in Williams-Beuren syndrome
PF08625	1	Utp13 specific WD40 associated domain
PF04420	1	CHD5-like protein
PF05179	1	RNA pol II accessory factor, Cdc73 family, C-terminal
PF08913	1	Vinculin Binding Site
PF01474	1	Class-II DAHP synthetase family
PF00210	1	Ferritin-like domain
PF02881	1	SRP54-type protein, helical bundle domain
PF04756	1	OST3 / OST6 family, transporter family
PF13279	1	Thioesterase-like superfamily
PF04129	1	Vps52 / Sac2 family
PF08737	1	Rgp1
PF12584	1	Trafficking protein particle complex subunit 10, TRAPPC10
PF06858	1	Nucleolar GTP-binding protein 1 (NOG1)
PF10199	1	Alpha and gamma adaptin binding protein p34
PF04910	1	Transcriptional repressor TCF25
PF12074	1	Domain of unknown function (DUF3554)
PF04281	1	Mitochondrial import receptor subunit Tom22
PF08704	1	tRNA methyltransferase complex GCD14 subunit
PF01680	1	SOR/SNZ family
PF01195	1	Peptidyl-tRNA hydrolase
PF09439	1	Signal recognition particle receptor beta subunit
PF15870	1	ElonginA binding-protein 1
PF13023	1	HD domain
PF02733	1	Dak1 domain
PF03587	1	EMG1/NEP1 methyltransferase
PF03807	1	NADP oxidoreductase coenzyme F420-dependent
PF00565	1	Staphylococcal nuclease homologue
PF01087	1	Galactose-1-phosphate uridyl transferase, N-terminal domain
PF06951	1	Group XII secretory phospholipase A2 precursor (PLA2G12)
PF15963	1	Myb DNA-binding like
PF16193	1	AAA C-terminal domain
PF06881	1	RNA polymerase II transcription factor SIII (Elongin) subunit A
PF14304	1	Transcription termination and cleavage factor C-terminal
PF00994	1	Probable molybdopterin binding domain
PF01855	1	Pyruvate flavodoxin/ferredoxin oxidoreductase, thiamine diP-bdg
PF01411	1	tRNA synthetases class II (A)
PF04750	1	FAR-17a/AIG1-like protein
PF04056	1	Ssl1-like
PF05024	1	N-acetylglucosaminyl transferase component (Gpi1)
PF07792	1	Docking domain of Afi1 for Arf3 in vesicle trafficking
PF00239	1	Resolvase, N terminal domain
PF06047	1	Ras-induced vulval development antagonist
PF16979	1	SAPK-interacting protein 1 (Sin1), Pleckstrin-homology
PF02744	1	Galactose-1-phosphate uridyl transferase, C-terminal domain
PF09825	1	Biotin-protein ligase, N terminal
PF02877	1	Poly(ADP-ribose) polymerase, regulatory domain
PF08501	1	Shikimate dehydrogenase substrate binding domain
PF16835	1	Pre-mRNA-splicing factor SF3a complex subunit 2 (Prp11)
PF01929	1	Ribosomal protein L14
PF04124	1	Dor1-like family
PF00425	1	chorismate binding enzyme
PF03179	1	Vacuolar (H+)-ATPase G subunit
PF16503	1	Zinc-ribbon
PF05181	1	XPA protein C-terminus
PF00348	1	Polyprenyl synthetase
PF05158	1	RNA polymerase Rpc34 subunit
PF14777	1	Cilia BBSome complex subunit 10
PF08646	1	Replication factor-A C terminal domain
PF02594	1	Uncharacterised ACR, YggU family COG1872
PF08153	1	NGP1NT (NUC091) domain
PF13515	1	Fusaric acid resistance protein-like
PF08155	1	NOGCT (NUC087) domain
PF05832	1	Eukaryotic protein of unknown function (DUF846)
PF02958	1	Ecdysteroid kinase
PF13907	1	Domain of unknown function (DUF4208)
PF06645	1	Microsomal signal peptidase 12 kDa subunit (SPC12)
PF03348	1	Serine incorporator (Serinc)
PF00838	1	Translationally controlled tumour protein
PF09668	1	Aspartyl protease
PF03099	1	Biotin/lipoate A/B protein ligase family
PF01287	1	Eukaryotic elongation factor 5A hypusine, DNA-binding OB fold
PF12842	1	Domain of unknown function (DUF3819)
PF06093	1	Spt4/RpoE2 zinc finger
PF10159	1	Kinase phosphorylation protein
PF02548	1	Ketopantoate hydroxymethyltransferase
PF02840	1	Prp18 domain
PF01261	1	Xylose isomerase-like TIM barrel
PF04574	1	Protein of unknown function (DUF592)
PF09741	1	Uncharacterized conserved protein (DUF2045)
PF01344	1	Kelch motif
PF12353	1	Eukaryotic translation initiation factor 3 subunit G
PF16752	1	Tubulin-specific chaperone C N-terminal domain
PF02811	1	PHP domain
PF15801	1	zf-MYND-like zinc finger, mRNA-binding
PF06058	1	Dcp1-like decapping family
PF10375	1	GRIP-related Arf-binding domain
PF02919	1	Eukaryotic DNA topoisomerase I, DNA binding fragment
PF02515	1	CoA-transferase family III
PF03871	1	RNA polymerase Rpb5, N-terminal domain
PF12157	1	Protein of unknown function (DUF3591)
PF08698	1	Fcf2 pre-rRNA processing
PF04127	1	DNA / pantothenate metabolism flavoprotein
PF13183	1	4Fe-4S dicluster domain
PF16900	1	Replication protein A OB domain
PF02109	1	DAD family
PF09026	1	Centromere protein B dimerisation domain
PF14360	1	PAP2 superfamily C-terminal
PF01852	1	START domain
PF01068	1	ATP dependent DNA ligase domain
PF14933	1	CEP19-like protein
PF03849	1	Transcription factor Tfb2
PF05346	1	Eukaryotic membrane protein family
PF14716	1	Helix-hairpin-helix domain
PF02268	1	Transcription initiation factor IIA, gamma subunit, helical domain
PF00939	1	Sodium:sulfate symporter transmembrane region
PF01488	1	Shikimate / quinate 5-dehydrogenase
PF12612	1	Tubulin folding cofactor D C terminal
PF10381	1	Autophagocytosis associated protein C-terminal
PF06110	1	Eukaryotic protein of unknown function (DUF953)
PF08590	1	Domain of unknown function (DUF1771)
PF03590	1	Aspartate-ammonia ligase
PF11722	1	CCCH zinc finger in TRM13 protein
PF01331	1	mRNA capping enzyme, catalytic domain
PF14772	1	Sperm tail
PF13350	1	Tyrosine phosphatase family
PF09358	1	Ubiquitin fold domain
PF08068	1	DKCLD (NUC011) domain
PF10347	1	RNA pol II promoter Fmp27 protein domain
PF02574	1	Homocysteine S-methyltransferase
PF02734	1	DAK2 domain
PF03660	1	PHF5-like protein
PF08071	1	RS4NT (NUC023) domain
PF06024	1	Orf78 (ac78)
PF02272	1	DHHA1 domain
PF06424	1	PRP1 splicing factor, N-terminal
PF12874	1	Zinc-finger of C2H2 type
PF01142	1	tRNA pseudouridine synthase D (TruD)
PF07200	1	Modifier of rudimentary (Mod(r)) protein
PF04157	1	EAP30/Vps36 family
PF03715	1	Noc2p family
PF15924	1	ALG11 mannosyltransferase N-terminus
PF05291	1	Bystin
PF15459	1	60S ribosome biogenesis protein Rrp14
PF13299	1	Cleavage and polyadenylation factor 2 C-terminal
PF05010	1	Transforming acidic coiled-coil-containing protein (TACC)
PF10260	1	Uncharacterized conserved domain (SAYSvFN)
PF06658	1	Protein of unknown function (DUF1168)
PF00285	1	Citrate synthase, C-terminal domain
PF02537	1	CrcB-like protein, Camphor Resistance (CrcB)
PF04376	1	Arginine-tRNA-protein transferase, N terminus
PF12309	1	KIF-1 binding protein C terminal
PF13423	1	Ubiquitin carboxyl-terminal hydrolase
PF00111	1	2Fe-2S iron-sulfur cluster binding domain
PF17135	1	Ribosomal protein 60S L18 and 50S L18e
PF06544	1	Protein of unknown function (DUF1115)
PF12906	1	RING-variant domain
PF04037	1	Domain of unknown function (DUF382)
PF09649	1	Histone chaperone domain CHZ
PF16575	1	mRNA cleavage and polyadenylation factor CLP1 P-loop
PF09430	1	Protein of unknown function (DUF2012)
PF06814	1	Lung seven transmembrane receptor
PF08676	1	MutL C terminal dimerisation domain
PF04675	1	DNA ligase N terminus
PF03577	1	Peptidase family C69
PF10180	1	Uncharacterised conserved protein (DUF2373)
PF02659	1	Putative manganese efflux pump
PF01509	1	TruB family pseudouridylate synthase (N terminal domain)
PF01981	1	Peptidyl-tRNA hydrolase PTH2
PF01564	1	Spermine/spermidine synthase domain
PF13886	1	Domain of unknown function (DUF4203)
PF01502	1	Phosphoribosyl-AMP cyclohydrolase
PF07189	1	Splicing factor 3B subunit 10 (SF3b10)
PF02687	1	FtsX-like permease family
PF01868	1	Domain of unknown function UPF0086
PF05406	1	WGR domain
PF07807	1	RED-like protein C-terminal region
PF03881	1	Fructosamine kinase
PF17034	1	Zinc-ribbon like family
PF01149	1	Formamidopyrimidine-DNA glycosylase N-terminal domain
PF01487	1	Type I 3-dehydroquinase
PF05502	1	Dynactin p62 family
PF02434	1	Fringe-like
PF15613	1	Williams-Beuren syndrome DDT (WSD), D-TOX E motif
PF00215	1	Orotidine 5'-phosphate decarboxylase / HUMPS family
PF13869	1	Nucleotide hydrolase
PF13863	1	Domain of unknown function (DUF4200)
PF10371	1	Domain of unknown function
PF02737	1	3-hydroxyacyl-CoA dehydrogenase, NAD binding domain
PF14699	1	N-terminal domain from the human glycogen debranching enzyme
PF03070	1	TENA/THI-4/PQQC family
PF03747	1	ADP-ribosylglycohydrolase
PF12247	1	Temperature dependent protein affecting M2 dsRNA replication
PF00762	1	Ferrochelatase
PF09229	1	Activator of Hsp90 ATPase, N-terminal
PF03941	1	Inner centromere protein, ARK binding region
PF01205	1	Uncharacterized protein family UPF0029
PF05786	1	Condensin complex subunit 2
PF01416	1	tRNA pseudouridine synthase
PF08713	1	DNA alkylation repair enzyme
PF00831	1	Ribosomal L29 protein
PF04410	1	Gar1/Naf1 RNA binding region
PF16275	1	Splicing factor 1 helix-hairpin domain
PF02152	1	Dihydroneopterin aldolase
PF05028	1	Poly (ADP-ribose) glycohydrolase (PARG)
PF02569	1	Pantoate-beta-alanine ligase
PF02545	1	Maf-like protein
PF12271	1	Chitin synthase III catalytic subunit
PF17406	1	Nrap protein PAP/OAS1-like domain 5
PF12044	1	Putative peptidase family
PF16507	1	Proteasome-substrate-size regulator, mid region
PF16796	1	Microtubule binding
PF05907	1	Eukaryotic protein of unknown function (DUF866)
PF06229	1	FRG1-like domain
PF08433	1	Chromatin associated protein KTI12
PF01791	1	DeoC/LacD family aldolase
PF01255	1	Putative undecaprenyl diphosphate synthase
PF09070	1	PFU (PLAA family ubiquitin binding)
PF05691	1	Raffinose synthase or seed imbibition protein Sip1
PF07576	1	BRCA1-associated protein 2
PF02632	1	BioY family
PF03416	1	Peptidase family C54
PF10263	1	SprT-like family
PF06870	1	A49-like RNA polymerase I associated factor
PF16134	1	THO complex subunit 2 N-terminus
PF00172	1	Fungal Zn(2)-Cys(6) binuclear cluster domain
PF04387	1	Protein tyrosine phosphatase-like protein, PTPLA
PF00303	1	Thymidylate synthase
PF16092	1	Domain of unknown function (DUF4821)
PF05002	1	SGS domain
PF01106	1	NifU-like domain
PF03998	1	Utp11 protein
PF02492	1	CobW/HypB/UreG, nucleotide-binding domain
PF14713	1	Domain of unknown function (DUF4464)
PF04073	1	Aminoacyl-tRNA editing domain
PF17125	1	N-terminal domain of 16S rRNA methyltransferase RsmF
PF00705	1	Proliferating cell nuclear antigen, N-terminal domain
PF02436	1	Conserved carboxylase domain
PF02516	1	Oligosaccharyl transferase STT3 subunit
PF14260	1	C4-type zinc-finger of DNA polymerase delta
PF01230	1	HIT domain
PF03332	1	Eukaryotic phosphomannomutase
PF02141	1	DENN (AEX-3) domain
PF10363	1	Required for nuclear transport of RNA pol II C-terminus 1
PF06978	1	Ribonucleases P/MRP protein subunit POP1
PF00586	1	AIR synthase related protein, N-terminal domain
PF02115	1	RHO protein GDP dissociation inhibitor
PF01074	1	Glycosyl hydrolases family 38 N-terminal domain
PF08647	1	BRE1 E3 ubiquitin ligase
PF02666	1	Phosphatidylserine decarboxylase
PF03009	1	Glycerophosphoryl diester phosphodiesterase family
PF04676	1	Protein similar to CwfJ C-terminus 2
PF05222	1	Alanine dehydrogenase/PNT, N-terminal domain
PF08232	1	Striatin family
PF04280	1	Tim44-like domain
PF10408	1	Ubiquitin elongating factor core
PF08574	1	Transcription factor Iwr1
PF16004	1	116 kDa U5 small nuclear ribonucleoprotein component N-terminus
PF00810	1	ER lumen protein retaining receptor
PF12740	1	Chlorophyllase enzyme
PF05920	1	Homeobox KN domain
PF08321	1	PPP5 TPR repeat region
PF16050	1	Paf1 complex subunit CDC73 N-terminal
PF01780	1	Ribosomal L37ae protein family
PF14874	1	Flagellar-associated PapD-like
PF09402	1	Man1-Src1p-C-terminal domain
PF16121	1	40S ribosomal protein S4 C-terminus
PF13091	1	PLD-like domain
PF01192	1	RNA polymerase Rpb6
PF02598	1	Putative RNA methyltransferase
PF02390	1	Putative methyltransferase
PF15454	1	Late endosomal/lysosomal adaptor and MAPK and MTOR activator
PF07780	1	Spb1 C-terminal domain
PF03447	1	Homoserine dehydrogenase, NAD binding domain
PF12755	1	Vacuolar 14 Fab1-binding region
PF02018	1	Carbohydrate binding domain
PF06862	1	Utp25, U3 small nucleolar RNA-associated SSU processome protein 25
PF02873	1	UDP-N-acetylenolpyruvoylglucosamine reductase, C-terminal domain
PF02844	1	Phosphoribosylglycinamide synthetase, N domain
PF06777	1	Helical and beta-bridge domain
PF08825	1	E2 binding domain
PF01965	1	DJ-1/PfpI family
PF01125	1	G10 protein
PF04841	1	Vps16, N-terminal region
PF00731	1	AIR carboxylase
PF09747	1	Coiled-coil domain containing protein (DUF2052)
PF01813	1	ATP synthase subunit D
PF05129	1	Transcription elongation factor Elf1 like
PF05517	1	p25-alpha
PF03733	1	Inner membrane component domain
PF04101	1	Glycosyltransferase family 28 C-terminal domain
PF05021	1	NPL4 family
PF11705	1	DNA-directed RNA polymerase III subunit Rpc31
PF01558	1	Pyruvate ferredoxin/flavodoxin oxidoreductase
PF05020	1	NPL4 family, putative zinc binding region
PF08292	1	RNA polymerase III subunit Rpc25
PF02441	1	Flavoprotein
PF09368	1	Sas10 C-terminal domain
PF16546	1	Homodimerisation domain of SGTA
PF06427	1	UDP-glucose:Glycoprotein Glucosyltransferase
PF05997	1	Nucleolar protein,Nop52
PF16198	1	tRNA pseudouridylate synthase B C-terminal domain
PF00792	1	Phosphoinositide 3-kinase C2
PF10233	1	Uncharacterized conserved protein CG6151-P
PF06419	1	Conserved oligomeric complex COG6
PF10359	1	RNA pol II promoter Fmp27 protein domain
PF03641	1	Possible lysine decarboxylase
PF16399	1	Intron-binding protein aquarius N-terminus
PF05891	1	AdoMet dependent proline di-methyltransferase
PF14222	1	Cell morphogenesis N-terminal
PF15341	1	Ribosome biogenesis protein SLX9
PF09325	1	Vps5 C terminal like
PF16528	1	Exocyst component 84 C-terminal
PF01636	1	Phosphotransferase enzyme family
PF08568	1	Uncharacterised protein family, YAP/Alf4/glomulin
PF04192	1	Utp21 specific WD40 associated putative domain
PF07767	1	Nop53 (60S ribosomal biogenesis)
PF09736	1	Pre-mRNA-splicing factor of RES complex
PF04502	1	Family of unknown function (DUF572)
PF01812	1	5-formyltetrahydrofolate cyclo-ligase family
PF06588	1	Muskelin N-terminus
PF10338	1	Protein of unknown function (DUF2423)
PF08118	1	Yeast mitochondrial distribution and morphology (MDM) proteins
PF07716	1	Basic region leucine zipper
PF05253	1	U11-48K-like CHHC zinc finger
PF00306	1	ATP synthase alpha/beta chain, C terminal domain
PF01902	1	Diphthamide synthase
PF00742	1	Homoserine dehydrogenase
PF04034	1	Ribosome biogenesis protein, C-terminal
PF07842	1	GC-rich sequence DNA-binding factor-like protein
[truncated: 510 more rows]

## Sheet: Orpjo
#Family	Protein_count	Pfam description			6714
PF02013	274	Cellulose or protein binding domain
PF12796	150	Ankyrin repeats (3 copies)
PF08757	119	CotH kinase protein
PF00069	115	Protein kinase domain
PF00187	92	Chitin recognition protein
PF00076	75	RNA recognition motif. (a.k.a. RRM, RBD, or RNP domain)
PF00734	72	Fungal cellulose binding domain
PF00005	71	ABC transporter
PF13855	49	Leucine rich repeat
PF13637	46	Ankyrin repeats (many copies)
PF00271	44	Helicase conserved C-terminal domain
PF00400	44	WD domain, G-beta repeat
PF01341	43	Glycosyl hydrolases family 6
PF00270	36	DEAD/DEAH box helicase
PF14200	36	Ricin-type beta-trefoil lectin domain-like
PF02011	35	Glycosyl hydrolase family 48
PF00018	35	SH3 domain
PF12698	35	ABC-2 family transporter protein
PF01522	31	Polysaccharide deacetylase
PF00004	30	ATPase family associated with various cellular activities (AAA)
PF02901	29	Pyruvate formate lyase-like
PF04616	28	Glycosyl hydrolases family 43
PF00331	28	Glycosyl hydrolase family 10
PF00149	28	Calcineurin-like phosphoesterase
PF00457	28	Glycosyl hydrolases family 11
PF00071	26	Ras family
PF00226	25	DnaJ domain
PF00012	25	Hsp70 protein
PF00082	24	Subtilase family
PF00150	24	Cellulase (glycosyl hydrolase family 5)
PF00083	24	Sugar (and other) transporter
PF07690	23	Major Facilitator Superfamily
PF16738	21	Starch-binding module 26
PF14604	21	Variant SH3 domain
PF00168	20	C2 domain
PF00179	19	Ubiquitin-conjugating enzyme
PF02015	18	Glycosyl hydrolase family 45
PF00085	18	Thioredoxin
PF00232	17	Glycosyl hydrolase family 1
PF00240	17	Ubiquitin family
PF00664	16	ABC transporter transmembrane region
PF03422	16	Carbohydrate binding module (family 6)
PF00227	15	Proteasome subunit
PF05649	15	Peptidase family M13
PF00160	15	Cyclophilin type peptidyl-prolyl cis-trans isomerase/CLD
PF00933	15	Glycosyl hydrolase family 3 N terminal domain
PF01915	15	Glycosyl hydrolase family 3 C-terminal domain
PF00621	14	RhoGEF domain
PF00155	14	Aminotransferase class I and II
PF00078	14	Reverse transcriptase (RNA-dependent DNA polymerase)
PF00011	14	Hsp20/alpha crystallin family
PF00465	14	Iron-containing alcohol dehydrogenase
PF00620	14	RhoGAP domain
PF00169	14	PH domain
PF01228	14	Glycine radical
PF00225	14	Kinesin motor domain
PF00561	14	alpha/beta hydrolase fold
PF08238	13	Sel1 repeat
PF13639	13	Ring finger domain
PF13857	13	Ankyrin repeats (many copies)
PF00248	13	Aldo/keto reductase family
PF14310	13	Fibronectin type III-like domain
PF00756	13	Putative esterase
PF00003	13	7 transmembrane sweet-taste receptor of 3 GCPR
PF00632	13	HECT-domain (ubiquitin-transferase)
PF00135	13	Carboxylesterase family
PF01546	12	Peptidase family M20/M25/M40
PF00009	12	Elongation factor Tu GTP binding domain
PF00566	12	Rab-GTPase-TBC domain
PF00759	12	Glycosyl hydrolase family 9
PF03372	12	Endonuclease/Exonuclease/phosphatase family
PF00118	12	TCP-1/cpn60 chaperonin family
PF03629	12	Carbohydrate esterase, sialic acid-specific acetylesterase
PF01399	12	PCI domain
PF00583	12	Acetyltransferase (GNAT) family
PF02801	11	Beta-ketoacyl synthase, C-terminal domain
PF00128	11	Alpha amylase, catalytic domain
PF00122	11	E1-E2 ATPase
PF00291	11	Pyridoxal-phosphate dependent enzyme
PF07534	11	TLD
PF00293	11	NUDIX domain
PF00109	11	Beta-ketoacyl synthase, N-terminal domain
PF00443	11	Ubiquitin carboxyl-terminal hydrolase
PF00013	11	KH domain
PF00153	11	Mitochondrial carrier protein
PF00320	11	GATA zinc finger
PF00088	10	Trefoil (P-type) domain
PF13499	10	EF-hand domain pair
PF00106	10	short chain dehydrogenase
PF01926	10	50S ribosome-binding GTPase
PF13246	10	Cation transport ATPase (P-type)
PF13472	10	GDSL-like Lipase/Acylhydrolase family
PF01602	10	Adaptin N terminal region
PF00501	10	AMP-binding enzyme
PF00656	10	Caspase domain
PF01423	10	LSM domain
PF00481	10	Protein phosphatase 2C
PF01431	10	Peptidase family M13
PF13347	9	MFS/sugar transport protein
PF04408	9	Helicase associated domain (HA2)
PF01055	9	Glycosyl hydrolases family 31
PF00615	9	Regulator of G protein signaling domain
PF00188	9	Cysteine-rich secretory protein family
PF00787	9	PX domain
PF09820	9	Predicted AAA-ATPase
PF16561	9	Glycogen recognition site of AMP-activated protein kinase
PF08282	8	haloacid dehalogenase-like hydrolase
PF13597	8	Anaerobic ribonucleoside-triphosphate reductase
PF00515	8	Tetratricopeptide repeat
PF04055	8	Radical SAM superfamily
PF00023	8	Ankyrin repeat
PF00550	8	Phosphopantetheine attachment site
PF01145	8	SPFH domain / Band 7 family
PF00856	8	SET domain
PF03810	8	Importin-beta N-terminal domain
PF07717	8	Oligonucleotide/oligosaccharide-binding (OB)-fold
PF00428	8	60s Acidic ribosomal protein
PF00493	8	MCM2/3/5 family
PF01398	8	JAB1/Mov34/MPN/PAD-1 ubiquitin protease
PF00176	8	SNF2 family N-terminal domain
PF00307	8	Calponin homology (CH) domain
PF00208	8	Glutamate/Leucine/Phenylalanine/Valine dehydrogenase
PF08613	8	Cyclin
PF03423	8	Carbohydrate binding domain (family 25)
PF10584	8	Proteasome subunit A N-terminal signature
PF03142	8	Chitin synthase
PF00439	8	Bromodomain
PF01363	8	FYVE zinc finger
PF13606	8	Ankyrin repeat
PF00022	8	Actin
PF03144	8	Elongation factor Tu domain 2
PF00117	8	Glutamine amidotransferase class-I
PF13802	8	Galactose mutarotase-like
PF16656	7	Purple acid Phosphatase, N-terminal domain
PF02815	7	MIR domain
PF00735	7	Septin
PF02517	7	CAAX protease self-immunity
PF00171	7	Aldehyde dehydrogenase family
PF00462	7	Glutaredoxin
PF00134	7	Cyclin, N-terminal domain
PF00505	7	HMG (high mobility group) box
PF00665	7	Integrase core domain
PF00397	7	WW domain
PF08766	7	DEK C terminal domain
PF00063	7	Myosin head (motor domain)
PF00698	7	Acyl transferase domain
PF00544	7	Pectate lyase
PF00498	7	FHA domain
PF16863	7	N-terminal barrel of NtMGAM and CtMGAM, maltase-glucoamylase
PF12799	7	Leucine Rich repeats (2 copies)
PF12171	7	Zinc-finger double-stranded RNA-binding
PF00107	7	Zinc-binding dehydrogenase
PF00534	7	Glycosyl transferases group 1
PF16212	7	Phospholipid-translocating P-type ATPase C-terminal
PF11380	7	Stealth protein CR2, conserved region 2
PF00642	7	Zinc finger C-x8-C-x5-C-x3-H type (and similar)
PF02535	7	ZIP Zinc transporter
PF00682	7	HMGL-like
PF03357	7	Snf7
PF00557	7	Metallopeptidase family M24
PF00025	7	ADP-ribosylation factor family
PF03031	7	NLI interacting factor-like phosphatase
PF16209	7	Phospholipid-translocating ATPase N-terminal
PF00454	6	Phosphatidylinositol 3- and 4-kinase
PF00130	6	Phorbol esters/diacylglycerol binding domain (C1 domain)
PF16192	6	C-terminal four TMM region of protein-O-mannosyltransferase
PF13086	6	AAA domain
PF08011	6	PD-(D/E)XK nuclease superfamily
PF14623	6	Hint-domain
PF17207	6	MCM OB domain
PF00326	6	Prolyl oligopeptidase family
PF01694	6	Rhomboid family
PF00335	6	Tetraspanin family
PF05739	6	SNARE domain
PF13087	6	AAA domain
PF01529	6	DHHC palmitoyltransferase
PF13416	6	Bacterial extracellular solute-binding protein
PF02366	6	Dolichyl-phosphate-mannose-protein mannosyltransferase
PF04525	6	LURP-one-related
PF00520	6	Ion transport protein
PF00722	6	Glycosyl hydrolases family 16
PF01302	6	CAP-Gly domain
PF03537	6	Glycoside-hydrolase family GH114
PF01412	6	Putative GTPase activating protein for Arf
PF01248	6	Ribosomal protein L7Ae/L30e/S12e/Gadd45 family
PF00241	6	Cofilin/tropomyosin-type actin-binding protein
PF13649	6	Methyltransferase domain
PF00724	6	NADH:flavin oxidoreductase / NADH oxidase family
PF01369	6	Sec7 domain
PF00696	6	Amino acid kinase family
PF13414	6	TPR repeat
PF03727	5	Hexokinase
PF03953	5	Tubulin C-terminal domain
PF04687	5	Microvirus H protein (pilot protein)
PF00133	5	tRNA synthetases class I (I, L, M and V)
PF01553	5	Acyltransferase
PF03129	5	Anticodon binding domain
PF03114	5	BAR domain
PF00637	5	Region in Clathrin and VPS
PF00694	5	Aconitase C-terminal domain
PF00899	5	ThiF family
PF11051	5	Mannosyltransferase putative
PF08241	5	Methyltransferase domain
PF00617	5	RasGEF domain
PF00675	5	Insulinase (Peptidase family M16)
PF00514	5	Armadillo/beta-catenin-like repeat
PF00789	5	UBX domain
PF03211	5	Pectate lyase
PF02146	5	Sir2 family
PF04810	5	Sec23/Sec24 zinc finger
PF05193	5	Peptidase M16 inactive domain
PF05637	5	galactosyl transferase GMA12/MNN10 family
PF00180	5	Isocitrate/isopropylmalate dehydrogenase
PF00623	5	RNA polymerase Rpb1, domain 2
PF02558	5	Ketopantoate reductase PanE/ApbA
PF00027	5	Cyclic nucleotide-binding domain
PF00587	5	tRNA synthetase class II core domain (G, H, P, S and T)
PF00191	5	Annexin
PF11901	5	Protein of unknown function (DUF3421)
PF01554	5	MatE
PF13920	5	Zinc finger, C3HC4 type (RING finger)
PF11904	5	GPCR-chaperone
PF04564	5	U-box domain
PF12706	5	Beta-lactamase superfamily domain
PF04983	5	RNA polymerase Rpb1, domain 3
PF04969	5	CS domain
PF07664	5	Ferrous iron transport protein B C terminus
PF00433	5	Protein kinase C terminal domain
PF14602	5	Hexapeptide repeat of succinyl-transferase
PF00046	5	Homeobox domain
PF03949	5	Malic enzyme, NAD binding domain
PF14624	5	VWA / Hh protein intein-like
PF01585	5	G-patch domain
PF08033	5	Sec23/Sec24 beta-sandwich domain
PF13848	5	Thioredoxin-like domain
PF00334	5	Nucleoside diphosphate kinase
PF07885	5	Ion channel
PF00224	5	Pyruvate kinase, barrel domain
PF08662	5	Eukaryotic translation initiation factor eIF2A
PF00646	5	F-box domain
PF04998	5	RNA polymerase Rpb1, domain 5
PF04811	5	Sec23/Sec24 trunk domain
PF05000	5	RNA polymerase Rpb1, domain 4
PF00780	5	CNH domain
PF16197	5	Ketoacyl-synthetase C-terminal extension
PF04815	5	Sec23/Sec24 helical domain
PF00456	5	Transketolase, thiamine diphosphate binding domain
PF00626	5	Gelsolin repeat
PF00254	5	FKBP-type peptidyl-prolyl cis-trans isomerase
PF00628	5	PHD-finger
PF00571	5	CBS domain
PF00288	5	GHMP kinases N terminal domain
PF14572	5	Phosphoribosyl synthetase-associated domain
PF00137	5	ATP synthase subunit C
PF13793	5	N-terminal domain of ribose phosphate pyrophosphokinase
PF00330	5	Aconitase family (aconitate hydratase)
PF02421	5	Ferrous iron transport protein B
PF01556	5	DnaJ C terminal domain
PF01063	5	Amino-transferase class IV
PF07992	5	Pyridine nucleotide-disulphide oxidoreductase
PF00627	5	UBA/TS-N domain
PF07670	5	Nucleoside recognition
PF07859	4	alpha/beta hydrolase fold
PF11997	4	Domain of unknown function (DUF3492)
PF08659	4	KR domain
PF00887	4	Acyl CoA binding protein
PF01270	4	Glycosyl hydrolases family 8
PF00650	4	CRAL/TRIO domain
PF00390	4	Malic enzyme, N-terminal domain
PF02127	4	Aminopeptidase I zinc metalloprotease (M18)
PF00183	4	Hsp90 protein
PF00349	4	Hexokinase
PF14551	4	MCM N-terminal domain
PF17101	4	Stealth protein CR1, conserved region 1
PF00610	4	Domain found in Dishevelled, Egl-10, and Pleckstrin (DEP)
PF00412	4	LIM domain
PF02800	4	Glyceraldehyde 3-phosphate dehydrogenase, C-terminal domain
PF00091	4	Tubulin/FtsZ family, GTPase domain
PF01575	4	MaoC like domain
PF01062	4	Bestrophin, RFP-TM, chloride channel
PF03143	4	Elongation factor Tu C-terminal domain
PF02887	4	Pyruvate kinase, alpha/beta domain
PF01066	4	CDP-alcohol phosphatidyltransferase
PF07727	4	Reverse transcriptase (RNA-dependent DNA polymerase)
PF12756	4	C2H2 type zinc-finger (2 copies)
PF00928	4	Adaptor complexes medium subunit family
PF06068	4	TIP49 C-terminus
PF04427	4	Brix domain
PF12894	4	Anaphase-promoting complex subunit 4 WD40 domain
PF12848	4	ABC transporter
PF04560	4	RNA polymerase Rpb2, domain 7
PF00389	4	D-isomer specific 2-hydroxyacid dehydrogenase, catalytic domain
PF03950	4	tRNA synthetases class I (E and Q), anti-codon binding domain
PF00689	4	Cation transporting ATPase, C-terminus
PF00478	4	IMP dehydrogenase / GMP reductase domain
PF00808	4	Histone-like transcription factor (CBF/NF-Y) and archaeal histone
PF01545	4	Cation efflux family
PF00854	4	POT family
PF02671	4	Paired amphipathic helix repeat
PF10431	4	C-terminal, D2-small domain, of ClpB protein
PF00786	4	P21-Rho-binding domain
PF07994	4	Myo-inositol-1-phosphate synthase
PF13519	4	von Willebrand factor type A domain
PF01433	4	Peptidase family M1 domain
PF00749	4	tRNA synthetases class I (E and Q), catalytic domain
PF00483	4	Nucleotidyl transferase
PF07724	4	AAA domain (Cdc48 subfamily)
PF00205	4	Thiamine pyrophosphate enzyme, central domain
PF00010	4	Helix-loop-helix DNA-binding domain
PF00753	4	Metallo-beta-lactamase superfamily
PF00618	4	RasGEF N-terminal motif
PF10607	4	CTLH/CRA C-terminal to LisH motif domain
PF16363	4	GDP-mannose 4,6 dehydratase
PF00850	4	Histone deacetylase domain
PF00821	4	Phosphoenolpyruvate carboxykinase C-terminal P-loop domain
PF01357	4	Pollen allergen
PF00890	4	FAD binding domain
PF03370	4	Carbohydrate/starch-binding module (family 21)
PF17297	4	Phosphoenolpyruvate carboxykinase N-terminal domain
PF12697	4	Alpha/beta hydrolase family
PF12352	4	Snare region anchored in the vesicle membrane C-terminus
PF02775	4	Thiamine pyrophosphate enzyme, C-terminal TPP binding domain
PF02878	4	Phosphoglucomutase/phosphomannomutase, alpha/beta/alpha domain I
PF02826	4	D-isomer specific 2-hydroxyacid dehydrogenase, NAD binding domain
PF02889	4	Sec63 Brl domain
PF14608	4	RNA-binding, Nab2-type zinc finger
PF00957	4	Synaptobrevin
PF05664	4	Plant family of unknown function (DUF810)
PF01432	4	Peptidase family M3
PF00249	4	Myb-like DNA-binding domain
PF01229	4	Glycosyl hydrolases family 39
PF10645	4	Carbohydrate binding
PF02874	4	ATP synthase alpha/beta family, beta-barrel domain
PF02140	4	Galactose binding lectin domain
PF00562	4	RNA polymerase Rpb2, domain 6
PF00690	4	Cation transporter/ATPase, N-terminus
PF00996	4	GDP dissociation inhibitor
PF09394	4	Chagasin family peptidase inhibitor I42
PF00704	4	Glycosyl hydrolases family 18
PF04565	4	RNA polymerase Rpb2, domain 3
PF01105	4	emp24/gp25L/p24 family/GOLD
PF13513	4	HEAT-like repeat
PF04193	4	PQ loop repeat
PF02020	4	eIF4-gamma/eIF5/eIF2-epsilon
PF00702	4	haloacid dehalogenase-like hydrolase
PF02883	4	Adaptin C-terminal domain
PF02776	4	Thiamine pyrophosphate enzyme, N-terminal TPP binding domain
PF01843	4	DIL domain
PF00365	4	Phosphofructokinase
PF00447	4	HSF-type DNA-binding
PF00564	4	PB1 domain
PF01336	4	OB-fold nucleic acid binding domain
PF13353	4	4Fe-4S single cluster domain
PF00006	4	ATP synthase alpha/beta family, nucleotide-binding domain
PF01504	4	Phosphatidylinositol-4-phosphate 5-Kinase
PF02136	4	Nuclear transport factor 2 (NTF2) domain
PF01764	4	Lipase (class 3)
PF02780	4	Transketolase, C-terminal domain
PF01753	4	MYND finger
PF00790	4	VHS domain
PF08240	4	Alcohol dehydrogenase GroES-like domain
PF02148	4	Zn-finger in ubiquitin-hydrolases and other protein
PF00125	4	Core histone H2A/H2B/H3/H4
PF00788	4	Ras association (RalGDS/AF-6) domain
PF01207	4	Dihydrouridine synthase (Dus)
PF07653	4	Variant SH3 domain
PF00622	4	SPRY domain
PF00170	4	bZIP transcription factor
PF00679	3	Elongation factor G C-terminus
PF04042	3	DNA polymerase alpha/epsilon subunit B
PF13415	3	Galactose oxidase, central domain
PF01189	3	16S rRNA methyltransferase RsmB/F
PF00903	3	Glyoxalase/Bleomycin resistance protein/Dioxygenase superfamily
PF02866	3	lactate/malate dehydrogenase, alpha/beta C-terminal domain
PF16300	3	Type of WD40 repeat
PF04003	3	Dip2/Utp12 Family
PF00995	3	Sec1 family
PF01212	3	Beta-eliminating lyase
PF01510	3	N-acetylmuramoyl-L-alanine amidase
PF02806	3	Alpha amylase, C-terminal all-beta domain
PF00782	3	Dual specificity phosphatase, catalytic domain
PF05773	3	RWD domain
PF06456	3	Arfaptin-like domain
PF08142	3	AARP2CN (NUC121) domain
PF01920	3	Prefoldin subunit
PF13193	3	AMP-binding enzyme C-terminal domain
PF10469	3	AKAP7 2'5' RNA ligase-like domain
PF07742	3	BTG family
PF02779	3	Transketolase, pyrimidine binding domain
PF04818	3	RNA polymerase II-binding domain.
PF01613	3	Flavin reductase like domain
PF07647	3	SAM domain (Sterile alpha motif)
PF17035	3	Bromodomain extra-terminal - transcription regulation
PF01501	3	Glycosyl transferase family 8
PF00654	3	Voltage gated chloride channel
PF04563	3	RNA polymerase beta subunit
PF01853	3	MOZ/SAS family
PF00488	3	MutS domain V
PF00575	3	S1 RNA binding domain
PF13419	3	Haloacid dehalogenase-like hydrolase
PF00503	3	G-protein alpha subunit
PF10294	3	Lysine methyltransferase
PF00852	3	Glycosyltransferase family 10 (fucosyltransferase) C-term
PF00096	3	Zinc finger, C2H2 type
PF14683	3	Polysaccharide lyase family 4, domain III
PF09336	3	Vps4 C terminal oligomerisation domain
PF02729	3	Aspartate/ornithine carbamoyltransferase, carbamoyl-P binding domain
PF13385	3	Concanavalin A-like lectin/glucanases superfamily
PF08534	3	Redoxin
PF02854	3	MIF4G domain
PF08389	3	Exportin 1-like protein
PF02128	3	Fungalysin metallopeptidase (M36)
PF12464	3	Maltose acetyltransferase
PF01472	3	PUA domain
PF14703	3	Cytosolic domain of 10TM putative phosphate transporter
PF02185	3	Hr1 repeat
PF04488	3	Glycosyltransferase sugar-binding region containing DXD motif
PF00218	3	Indole-3-glycerol phosphate synthase
PF03931	3	Skp1 family, tetramerisation domain
PF07521	3	Zn-dependent metallo-hydrolase RNA specificity domain
PF01490	3	Transmembrane amino acid transporter protein
PF13646	3	HEAT repeats
PF14555	3	UBA-like domain
PF12784	3	PD-(D/E)XK nuclease family transposase
PF00056	3	lactate/malate dehydrogenase, NAD binding domain
PF12717	3	non-SMC mitotic condensation complex subunit 1
PF01466	3	Skp1 family, dimerisation domain
PF00638	3	RanBP1 domain
PF01151	3	GNS1/SUR4 family
PF13238	3	AAA domain
PF05495	3	CHY zinc finger
PF03600	3	Citrate transporter
PF08953	3	Domain of unknown function (DUF1899)
PF07973	3	Threonyl and Alanyl tRNA synthetase second additional domain
PF00651	3	BTB/POZ domain
PF01201	3	Ribosomal protein S8e
PF00385	3	Chromo (CHRromatin Organisation MOdifier) domain
PF10075	3	CSN8/PSMD8/EIF3K family
PF04997	3	RNA polymerase Rpb1, domain 1
PF15140	3	Domain of unknown function (DUF4573)
PF01480	3	PWI domain
PF00535	3	Glycosyl transferase family 2
PF13774	3	Regulated-SNARE-like domain
PF01663	3	Type I phosphodiesterase / nucleotide pyrophosphatase
PF09359	3	VTC domain
PF13967	3	Late exocytosis, associated with Golgi transport
PF02275	3	Linear amide C-N hydrolases, choloylglycine hydrolase family
PF02516	3	Oligosaccharyl transferase STT3 subunit
PF04153	3	NOT2 / NOT3 / NOT5 family
PF01479	3	S4 domain
PF16016	3	Domain of unknown function (DUF4782)
PF00579	3	tRNA synthetases class I (W and Y)
PF16661	3	Metallo-beta-lactamase superfamily domain
PF00152	3	tRNA synthetases class II (D, K and N)
PF16891	3	Serine-threonine protein phosphatase N-terminal domain
PF01569	3	PAP2 superfamily
PF00982	3	Glycosyltransferase family 20
PF00098	3	Zinc knuckle
PF02194	3	PXA domain
PF01096	3	Transcription factor S-II (TFIIS)
PF00044	3	Glyceraldehyde 3-phosphate dehydrogenase, NAD binding domain
PF12718	3	Tropomyosin like
PF00570	3	HRDC domain
PF13012	3	Maintenance of mitochondrial structure and function
PF00300	3	Histidine phosphatase superfamily (branch 1)
PF02845	3	CUE domain
PF11443	3	Domain of unknown function (DUF2828)
PF00408	3	Phosphoglucomutase/phosphomannomutase, C-terminal domain
PF00206	3	Lyase
PF12783	3	Guanine nucleotide exchange factor in Golgi transport N-terminal
PF01781	3	Ribosomal L38e protein family
PF01048	3	Phosphorylase superfamily
PF00258	3	Flavodoxin
PF00432	3	Prenyltransferase and squalene oxidase repeat
PF01008	3	Initiation factor 2 subunit family
PF00156	3	Phosphoribosyl transferase domain
PF05383	3	La domain
PF04893	3	Yip1 domain
PF00466	3	Ribosomal protein L10
PF04142	3	Nucleotide-sugar transporter
PF02114	3	Phosducin
PF08264	3	Anticodon-binding domain of tRNA
PF08544	3	GHMP kinases C terminal
PF00916	3	Sulfate permease family
PF03901	3	Alg9-like mannosyltransferase family
PF01042	3	Endoribonuclease L-PSP
PF02786	3	Carbamoyl-phosphate synthase L chain, ATP binding domain
PF00173	3	Cytochrome b5-like Heme/Steroid binding domain
PF03151	3	Triose-phosphate Transporter family
PF12348	3	CLASP N terminal
PF03637	3	Mob1/phocein family
PF12146	3	Serine aminopeptidase, S33
PF13432	3	Tetratricopeptide repeat
PF05192	3	MutS domain III
PF04724	3	Glycosyltransferase family 17
PF10191	3	Golgi complex component 7 (COG7)
PF00132	3	Bacterial transferase hexapeptide (six repeats)
PF03798	3	TLC domain
PF05057	3	Putative serine esterase (DUF676)
PF02922	3	Carbohydrate-binding module 48 (Isoamylase N-terminal domain)
PF01263	3	Aldose 1-epimerase
PF00611	3	Fes/CIP4, and EFC/F-BAR homology domain
PF05277	3	Protein of unknown function (DUF726)
PF07002	3	Copine
PF02463	3	RecF/RecN/SMC N terminal domain
PF14686	3	Polysaccharide lyase family 4, domain II
PF05188	3	MutS domain II
PF03104	3	DNA polymerase family B, exonuclease domain
PF00266	3	Aminotransferase class-V
PF08550	3	Fungal protein of unknown function (DUF1752)
PF02518	3	Histidine kinase-, DNA gyrase B-, and HSP90-like ATPase
PF14765	3	Polyketide synthase dehydratase
PF03553	3	Na+/H+ antiporter family
PF10996	3	Beta-Casp domain
PF00136	3	DNA polymerase family B
PF06045	3	Rhamnogalacturonate lyase family
PF13847	3	Methyltransferase domain
PF14521	3	Lysine-specific metallo-endopeptidase
PF00092	3	von Willebrand factor type A domain
PF14492	3	Elongation Factor G, domain II
PF10540	3	Munc13 (mammalian uncoordinated) homology domain
PF00262	3	Calreticulin family
PF00536	3	SAM domain (Sterile alpha motif)
PF00616	3	GTPase-activator protein for Ras-like GTPase
PF02358	3	Trehalose-phosphatase
PF04053	3	Coatomer WD associated region
PF02714	3	Calcium-dependent channel, 7TM region, putative phosphate
PF00988	3	Carbamoyl-phosphate synthase small chain, CPSase domain
PF10609	3	NUBPL iron-transfer P-loop NTPase
PF01217	3	Clathrin adaptor complex small chain
PF00185	3	Aspartate/ornithine carbamoyltransferase, Asp/Orn binding domain
PF02824	3	TGS domain
PF01798	3	snoRNA binding domain, fibrillarin
PF00350	3	Dynamin family
PF01624	3	MutS domain I
PF14938	3	Soluble NSF attachment protein, SNAP
PF02656	3	Domain of unknown function (DUF202)
PF04515	3	Plasma-membrane choline transporter
PF03028	3	Dynein heavy chain and region D6 of dynein motor
PF00784	3	MyTH4 domain
PF13716	3	Divergent CRAL/TRIO domain
PF02466	3	Tim17/Tim22/Tim23/Pmp24 family
PF03983	2	SLA1 homology domain 1, SHD1
PF15456	2	Up-regulated During Septation
PF01163	2	RIO1 family
PF00164	2	Ribosomal protein S12/S23
PF03630	2	Fumble
PF12220	2	U1 small nuclear ribonucleoprotein of 70kDa MW N terminal
PF11817	2	Foie gras liver health family 1
PF08699	2	Argonaute linker 1 domain
PF00120	2	Glutamine synthetase, catalytic domain
PF01090	2	Ribosomal protein S19e
PF01053	2	Cys/Met metabolism PLP-dependent enzyme
PF01246	2	Ribosomal protein L24e
PF03853	2	YjeF-related protein N-terminus
PF13380	2	CoA binding domain
PF06738	2	Putative threonine/serine exporter
PF05602	2	Cleft lip and palate transmembrane protein 1 (CLPTM1)
PF00201	2	UDP-glucoronosyl and UDP-glucosyl transferase
PF05023	2	Phytochelatin synthase
PF01150	2	GDA1/CD39 (nucleoside phosphatase) family
PF01176	2	Translation initiation factor 1A / IF-1
PF01199	2	Ribosomal protein L34e
PF00238	2	Ribosomal protein L14p/L23e
PF11717	2	RNA binding activity-knot of a chromodomain
PF11838	2	ERAP1-like C-terminal domain
PF06769	2	YoeB-like toxin of bacterial type II toxin-antitoxin system
PF02925	2	Bacteriophage scaffolding protein D
PF00415	2	Regulator of chromosome condensation (RCC1) repeat
PF01591	2	6-phosphofructo-2-kinase
PF00923	2	Transaldolase/Fructose-6-phosphate aldolase
PF08546	2	Ketopantoate reductase PanE/ApbA C terminal
PF06991	2	Microfibril-associated/Pre-mRNA processing
PF00892	2	EamA-like transporter family
PF04097	2	Nup93/Nic96
PF08726	2	Ca2+ insensitive EF hand
PF00378	2	Enoyl-CoA hydratase/isomerase
PF07738	2	Sad1 / UNC-like C-terminal
PF01280	2	Ribosomal protein L19e
PF16418	2	CCR4-NOT transcription complex subunit 1 HEAT repeat
PF02259	2	FAT domain
PF09511	2	RNA ligase
PF08069	2	Ribosomal S13/S15 N-terminal domain
PF08700	2	Vps51/Vps67
PF08518	2	Spa2 homology domain (SHD) of GIT
PF01667	2	Ribosomal protein S27
PF01070	2	FMN-dependent dehydrogenase
PF00697	2	N-(5'phosphoribosyl)anthranilate (PRA) isomerase
PF08156	2	NOP5NT (NUC127) domain
PF00989	2	PAS fold
PF00590	2	Tetrapyrrole (Corrin/Porphyrin) Methylases
PF08354	2	Domain of unknown function (DUF1729)
PF16990	2	Carbohydrate binding module (family 35)
PF15916	2	Domain of unknown function (DUF4743)
PF01805	2	Surp module
PF01434	2	Peptidase family M41
PF16486	2	N-terminal domain of argonaute
PF02933	2	Cell division protein 48 (CDC48), domain 2
PF04072	2	Leucine carboxyl methyltransferase
PF07970	2	Endoplasmic reticulum vesicle transporter
PF01842	2	ACT domain
PF07540	2	Nucleolar complex-associated protein
PF01269	2	Fibrillarin
PF00670	2	S-adenosyl-L-homocysteine hydrolase, NAD binding domain
PF08303	2	tRNA ligase kinase domain
PF08597	2	Translation initiation factor eIF3 subunit
PF12455	2	Dynein associated protein
PF01283	2	Ribosomal protein S26e
PF00175	2	Oxidoreductase NAD-binding domain
PF01679	2	Proteolipid membrane potential modulator
PF02773	2	S-adenosylmethionine synthetase, C-terminal domain
PF10032	2	Phosphate transport (Pho88)
PF17216	2	Rrp44-like cold shock domain
PF05368	2	NmrA-like family
PF13245	2	AAA domain
PF05224	2	NDT80 / PhoG like DNA-binding family
PF06470	2	SMC proteins Flexible Hinge Domain
PF12931	2	Sec23-binding domain of Sec16
PF06428	2	GDP/GTP exchange factor Sec2p
PF01833	2	IPT/TIG domain
PF14308	2	X-domain of DnaJ-containing
PF16589	2	BRCT domain, a BRCA1 C-terminus domain
PF00687	2	Ribosomal protein L1p/L10e family
PF06912	2	Protein of unknown function (DUF1275)
PF02881	2	SRP54-type protein, helical bundle domain
PF08799	2	pre-mRNA processing factor 4 (PRP4) like
PF15902	2	Sortilin, neurotensin receptor 3,
PF12449	2	Protein of unknown function (DUF3684)
PF12054	2	Domain of unknown function (DUF3535)
PF13949	2	ALIX V-shaped domain binding to HIV
PF04366	2	Las17-binding protein actin regulator
PF03764	2	Elongation factor G, domain IV
PF08295	2	Sin3 family co-repressor
PF00641	2	Zn-finger in Ran binding protein and others
PF01676	2	Metalloenzyme superfamily
PF00631	2	GGL domain
PF16879	2	C-terminal domain of Sin3a protein
PF01087	2	Galactose-1-phosphate uridyl transferase, N-terminal domain
PF15963	2	Myb DNA-binding like
PF04567	2	RNA polymerase Rpb2, domain 5
PF07470	2	Glycosyl Hydrolase Family 88
PF00312	2	Ribosomal protein S15
PF01483	2	Proprotein convertase P-domain
PF16897	2	C-terminal region of MMR_HSR1 domain
PF04054	2	CCR4-Not complex component, Not1
PF01411	2	tRNA synthetases class II (A)
PF16131	2	Torus domain
PF02744	2	Galactose-1-phosphate uridyl transferase, C-terminal domain
PF09324	2	Domain of unknown function (DUF1981)
PF16124	2	RecQ zinc-binding
PF01740	2	STAS domain
PF00838	2	Translationally controlled tumour protein
PF12842	2	Domain of unknown function (DUF3819)
PF06017	2	Unconventional myosin tail, actin- and lipid-binding
PF00380	2	Ribosomal protein S9/S16
PF04191	2	Phospholipid methyltransferase
PF00773	2	RNB domain
PF02910	2	Fumarate reductase flavoprotein C-term
PF09382	2	RQC domain
PF00538	2	linker histone H1 and H5 family
PF00795	2	Carbon-nitrogen hydrolase
PF03095	2	Phosphotyrosyl phosphate activator (PTPA) protein
PF12051	2	Protein of unknown function (DUF3533)
PF14382	2	Exosome complex exonuclease RRP4 N-terminal region
PF01000	2	RNA polymerase Rpb3/RpoA insert domain
PF01080	2	Presenilin
PF08628	2	Sorting nexin C terminal
PF00290	2	Tryptophan synthase alpha chain
PF02272	2	DHHA1 domain
PF01428	2	AN1-like Zinc finger
PF03062	2	MBOAT, membrane-bound O-acyltransferase family
PF01749	2	Importin beta binding domain
PF01496	2	V-type ATPase 116kDa subunit family
PF03271	2	EB1-like C-terminal motif
PF02990	2	Endomembrane protein 70
PF03577	2	Peptidase family C69
PF00250	2	Forkhead domain
PF16369	2	C-terminal of Glycosyl hydrolases family 43
PF14570	2	RING/Ubox like zinc-binding domain
PF02782	2	FGGY family of carbohydrate kinases, C-terminal domain
PF08449	2	UAA transporter family
PF04096	2	Nucleoporin autopeptidase
PF00999	2	Sodium/hydrogen exchanger family
PF05648	2	Peroxisomal biogenesis factor 11 (PEX11)
PF01502	2	Phosphoribosyl-AMP cyclohydrolase
PF01894	2	Uncharacterised protein family UPF0047
PF13923	2	Zinc finger, C3HC4 type (RING finger)
PF01849	2	NAC domain
PF01988	2	VIT family
PF02737	2	3-hydroxyacyl-CoA dehydrogenase, NAD binding domain
PF04180	2	Low temperature viability protein
PF08513	2	LisH
PF04212	2	MIT (microtubule interacting and transport) domain
PF06395	2	CDC24 Calponin
PF10587	2	Eukaryotic elongation factor 1 beta central acidic region
PF10602	2	26S proteasome subunit RPN7
PF00233	2	3'5'-cyclic nucleotide phosphodiesterase
PF01728	2	FtsJ-like methyltransferase
PF04410	2	Gar1/Naf1 RNA binding region
PF16211	2	C-terminus of histone H2A
PF12396	2	Protein of unknown function (DUF3659)
PF00406	2	Adenylate kinase
PF04468	2	PSP1 C-terminal conserved region
PF02787	2	Carbamoyl-phosphate synthetase large chain, oligomerisation domain
PF16161	2	Domain of unknown function (DUF4867)
PF07651	2	ANTH domain
PF01808	2	AICARFT/IMPCHase bienzyme
PF14559	2	Tetratricopeptide repeat
PF01154	2	Hydroxymethylglutaryl-coenzyme A synthase N terminal
PF05965	2	F/Y rich C-terminus
PF12265	2	Histone-binding protein RBBP4 or subunit C of CAF1 complex
PF16186	2	Atypical Arm repeat
PF13393	2	Histidyl-tRNA synthetase
PF01237	2	Oxysterol-binding protein
PF13959	2	Domain of unknown function (DUF4217)
PF03152	2	Ubiquitin fusion degradation protein UFD1
PF04051	2	Transport protein particle (TRAPP) component
PF02666	2	Phosphatidylserine decarboxylase
PF03388	2	Legume-like lectin family
PF03074	2	Glutamate-cysteine ligase
PF04950	2	40S ribosome biogenesis protein Tsr1 and BMS1 C-terminal
PF13287	2	Fn3 associated
PF01450	2	Acetohydroxy acid isomeroreductase, catalytic domain
PF16487	2	Mid domain of argonaute
PF04597	2	Ribophorin I
PF13850	2	Endoplasmic Reticulum-Golgi Intermediate Compartment (ERGIC)
PF01780	2	Ribosomal L37ae protein family
PF02880	2	Phosphoglucomutase/phosphomannomutase, alpha/beta/alpha domain III
PF01266	2	FAD dependent oxidoreductase
PF16415	2	CCR4-NOT transcription complex subunit 1 CAF1-binding domain
PF15979	2	Glycosyl hydrolase family 115
PF02812	2	Glu/Leu/Phe/Val dehydrogenase, dimerisation domain
PF01118	2	Semialdehyde dehydrogenase, NAD binding domain
PF01751	2	Toprim domain
PF13691	2	tRNase Z endonuclease
PF00467	2	KOW motif
PF00635	2	MSP (Major sperm protein) domain
PF01965	2	DJ-1/PfpI family
PF00294	2	pfkB family carbohydrate kinase
PF12678	2	RING-H2 zinc finger domain
PF00883	2	Cytosol aminopeptidase family, catalytic domain
PF07228	2	Stage II sporulation protein E (SpoIIE)
PF12932	2	Vesicle coat trafficking protein Sec16 mid-region
PF12999	2	Glucosidase II beta subunit-like
PF09295	2	ChAPs (Chs5p-Arf1p-binding proteins)
PF00448	2	SRP54-type protein, GTPase domain
PF03178	2	CPSF A subunit region
PF16172	2	DOCK N-terminus
PF13696	2	Zinc knuckle
PF06588	2	Muskelin N-terminus
PF01116	2	Fructose-bisphosphate aldolase class-II
PF07716	2	Basic region leucine zipper
PF05964	2	F/Y-rich N-terminus
PF01757	2	Acyltransferase family
PF12110	2	Nuclear protein 96
PF08512	2	Histone chaperone Rttp106-like
PF00793	2	DAHP synthetase I family
PF00881	2	Nitroreductase family
PF03134	2	TB2/DP1, HVA22 family
PF13805	2	Eisosome component PIL1
PF00162	2	Phosphoglycerate kinase
PF08159	2	NUC153 domain
PF02383	2	SacI homology domain
PF02984	2	Cyclin, C-terminal domain
PF03828	2	Cid1 family poly A polymerase
PF01937	2	Protein of unknown function DUF89
PF15405	2	Pleckstrin homology domain
PF05843	2	Suppressor of forked protein (Suf)
PF00474	2	Sodium:solute symporter family
PF00877	2	NlpC/P60 family
PF02893	2	GRAM domain
PF13424	2	Tetratricopeptide repeat
PF01459	2	Eukaryotic porin
PF10601	2	LITAF-like zinc ribbon domain
PF13908	2	Wnt and FGF inhibitory regulator
PF01907	2	Ribosomal protein L37e
PF13460	2	NAD(P)H-binding
PF13366	2	PD-(D/E)XK nuclease superfamily
PF01370	2	NAD dependent epimerase/dehydratase family
PF10101	2	Predicted membrane protein (DUF2339)
PF13015	2	Glucosidase II beta subunit-like protein
PF04707	2	PRELI-like family
PF16543	2	DRG Family Regulatory Proteins, Tma46
PF09446	2	VMA21-like domain
PF03055	2	Retinal pigment epithelial membrane protein
PF16073	2	Starter unit:ACP transacylase in aflatoxin biosynthesis
PF00849	2	RNA pseudouridylate synthase
PF07915	2	Glucosidase II beta subunit-like protein
PF00313	2	'Cold-shock' DNA-binding domain
PF03127	2	GAT domain
PF01088	2	Ubiquitin carboxyl-terminal hydrolase, family 1
PF00551	2	Formyl transferase
PF00569	2	Zinc finger, ZZ type
PF02872	2	5'-nucleotidase, C-terminal domain
PF00725	2	3-hydroxyacyl-CoA dehydrogenase, C-terminal domain
PF01699	2	Sodium/calcium exchanger protein
PF12541	2	Protein of unknown function (DUF3737)
PF03248	2	Rer1 family
PF01026	2	TatD related DNase
PF10367	2	Vacuolar sorting protein 39 domain 2
PF01138	2	3' exoribonuclease family, domain 1
PF01873	2	Domain found in IF2B/IF5
PF06220	2	U1 zinc finger
PF01775	2	Ribosomal proteins 50S-L18Ae/60S-L20/60S-L18A
PF05922	2	Peptidase inhibitor I9
PF07991	2	Acetohydroxy acid isomeroreductase, NADPH-binding domain
PF02200	2	STE like transcription factor
PF03661	2	Uncharacterised protein family (UPF0121)
PF00235	2	Profilin
PF02149	2	Kinase associated domain 1
PF00977	2	Histidine biosynthesis protein
PF12710	2	haloacid dehalogenase-like hydrolase
PF04511	2	Der1-like family
PF04777	2	Erv1 / Alr family
PF00549	2	CoA-ligase
PF02885	2	Glycosyl transferase family, helical bundle domain
PF12437	2	Glutamine synthetase type III N terminal
PF02306	2	Major spike protein (G protein)
PF01417	2	ENTH domain
PF08356	2	EF hand associated
PF07393	2	Exocyst complex component Sec10
PF02879	2	Phosphoglucomutase/phosphomannomutase, alpha/beta/alpha domain II
PF04768	2	NAT, N-acetyltransferase, of N-acetylglutamate synthase
PF01851	2	Proteasome/cyclosome repeat
PF16558	2	Amino-terminal Zinc-binding domain of ubiquitin ligase E3A
PF01588	2	Putative tRNA binding domain
PF12234	2	RAVE protein 1 C terminal
PF04695	2	Peroxisomal membrane anchor protein (Pex14p) conserved region
PF01158	2	Ribosomal protein L36e
PF02077	2	SURF4 family
PF01214	2	Casein kinase II regulatory subunit
PF01044	2	Vinculin family
PF16496	2	SWIRM-associated domain at the N-terminal
PF02171	2	Piwi domain
PF04670	2	Gtr1/RagA G protein conserved region
PF00667	2	FAD binding domain
PF16529	2	WD40 region of Ge1, enhancer of mRNA-decapping protein
PF03029	2	Conserved hypothetical ATP binding protein
PF02769	2	AIR synthase related protein, C-terminal domain
PF01020	2	Ribosomal L40e family
PF02996	2	Prefoldin subunit
PF04177	2	TAP42-like family
PF02145	2	Rap/ran-GAP
PF08148	2	DSHCT (NUC185) domain
PF00370	2	FGGY family of carbohydrate kinases, N-terminal domain
PF00924	2	Mechanosensitive ion channel
PF04068	2	Possible Fer4-like domain in RNase L inhibitor, RLI
PF14497	2	Glutathione S-transferase, C-terminal domain
PF00521	2	DNA gyrase/topoisomerase IV, subunit A
PF07714	2	Protein tyrosine kinase
PF00445	2	Ribonuclease T2 family
PF00438	2	S-adenosylmethionine synthetase, N-terminal domain
PF14273	2	Domain of unknown function (DUF4360)
PF02847	2	MA3 domain
PF01547	2	Bacterial extracellular solute-binding protein
PF13234	2	rRNA-processing arch domain
PF00717	2	Peptidase S24-like
PF01648	2	4'-phosphopantetheinyl transferase superfamily
PF08632	2	Activator of mitotic machinery Cdc14 phosphatase activation C-term
PF01031	2	Dynamin central region
PF03914	2	CBF/Mak21 family
PF00613	2	Phosphoinositide 3-kinase family, accessory domain (PIK domain)
PF01758	2	Sodium Bile acid symporter family
PF03839	2	Translocation protein Sec62
PF01408	2	Oxidoreductase family, NAD-binding Rossmann fold
PF10433	2	Mono-functional DNA-alkylating methyl methanesulfonate N-term
PF01467	2	Cytidylyltransferase-like
PF00736	2	EF-1 guanine nucleotide exchange domain
PF00464	2	Serine hydroxymethyltransferase
PF01193	2	RNA polymerase Rpb3/Rpb11 dimerisation domain
PF01476	2	LysM domain
PF01015	2	Ribosomal S3Ae family
PF04172	2	LrgB-like family
PF09079	2	CDC6, C terminal winged helix domain
PF03097	2	BRO1-like domain
PF00203	2	Ribosomal protein S19
PF02150	2	RNA polymerases M/15 Kd subunit
PF00328	2	Histidine phosphatase superfamily (branch 2)
PF02305	2	Capsid protein (F protein)
PF07749	2	Endoplasmic reticulum protein ERp29, C-terminal domain
PF05160	2	DSS1/SEM1 family
PF08540	2	Hydroxymethylglutaryl-coenzyme A synthase C terminal
PF01704	2	UTP--glucose-1-phosphate uridylyltransferase
PF16417	2	CCR4-NOT transcription complex subunit 1 TTP binding domain
PF13290	2	Chitobiase/beta-hexosaminidase C-terminal domain
PF01778	2	Ribosomal L28e protein family
PF03765	2	CRAL/TRIO, N-terminal domain
PF08543	2	Phosphomethylpyrimidine kinase
PF09180	2	Prolyl-tRNA synthetase, C-terminal
PF02256	2	Iron hydrogenase small subunit
PF13452	2	N-terminal half of MaoC dehydratase
PF04023	2	FeoA domain
PF13522	2	Glutamine amidotransferase domain
PF12763	2	Cytoskeletal-regulatory complex EF hand
PF12542	2	Pre-mRNA splicing factor
PF02906	2	Iron only hydrogenase large subunit, C-terminal domain
PF00450	2	Serine carboxypeptidase
PF00343	2	Carbohydrate phosphorylase
PF03381	2	LEM3 (ligand-effect modulator 3) family / CDC50 family
PF04499	2	SIT4 phosphatase-associated protein
PF00959	2	Phage lysozyme
PF12937	2	F-box-like
PF16746	2	BAR domain of APPL family
PF02798	2	Glutathione S-transferase, N-terminal domain
PF04000	2	Sas10/Utp3/C1D family
PF02810	2	SEC-C motif
PF05670	2	Domain of unknown function (DUF814)
PF03770	2	Inositol polyphosphate kinase
PF04727	2	ELMO/CED-12 family
PF01872	2	RibD C-terminal domain
PF01095	2	Pectinesterase
PF13865	2	C-terminal duplication domain of Friend of PRMT1
PF00252	2	Ribosomal protein L16p/L10e
PF15665	2	Family with sequence similarity 184, A and B
PF00382	2	Transcription factor TFIIB repeat
PF00533	2	BRCA1 C Terminus (BRCT) domain
PF00815	2	Histidinol dehydrogenase
PF02201	2	SWIB/MDM2 domain
PF13418	2	Galactose oxidase, central domain
PF05529	2	B-cell receptor-associated protein 31-like
PF02170	2	PAZ domain
PF05022	2	SRP40, C-terminal domain
PF01435	2	Peptidase family M48
PF00804	2	Syntaxin
PF15411	2	Pleckstrin homology domain
PF00318	2	Ribosomal protein S2
PF09234	2	Domain of unknown function (DUF1963)
PF04566	2	RNA polymerase Rpb2, domain 4
PF01909	2	Nucleotidyltransferase domain
PF16076	2	Acyltransferase C-terminus
PF17123	2	RING-like zinc finger
PF01239	2	Protein prenyltransferase alpha subunit repeat
PF02772	2	S-adenosylmethionine synthetase, central domain
PF08355	2	EF hand associated
PF10509	2	Galactokinase galactose-binding signature
PF05693	2	Glycogen synthase
PF14228	2	Cell morphogenesis central region
PF00591	2	Glycosyl transferase family, a/b domain
PF01253	2	Translation initiation factor SUI1
PF01092	2	Ribosomal protein S6e
PF04433	2	SWIRM domain
PF14262	2	Carbohydrate-binding domain-containing protein Cthe_2159
PF04117	1	Mpv17 / PMP22 family
PF04898	1	Glutamate synthase central domain
PF02225	1	PA domain
PF05362	1	Lon protease (S16) C-terminal proteolytic domain
PF02445	1	Quinolinate synthetase A protein
PF04882	1	Peroxin-3
PF12850	1	Calcineurin-like phosphoesterase superfamily domain
PF00855	1	PWWP domain
PF05182	1	Fip1 motif
PF10447	1	Exosome component EXOSC1/CSL4
PF08311	1	Mad3/BUB1 homology region 1
PF01264	1	Chorismate synthase
PF13899	1	Thioredoxin-like
PF03167	1	Uracil DNA glycosylase superfamily
PF01769	1	Divalent cation transporter
PF08154	1	NLE (NUC135) domain
PF14636	1	Folliculin-interacting protein N-terminus
PF05206	1	Methyltransferase TRM13
PF02219	1	Methylenetetrahydrofolate reductase
PF08320	1	PIG-X / PBN1
PF02502	1	Ribose/Galactose Isomerase
PF01984	1	Double-stranded DNA-binding domain
PF08079	1	Ribosomal L30 N-terminal domain
PF13964	1	Kelch motif
PF01956	1	Integral membrane protein DUF106
PF06244	1	Coiled-coil domain-containing protein 124
PF01200	1	Ribosomal protein S28e
PF04571	1	lipin, N-terminal conserved region
PF00289	1	Biotin carboxylase, N-terminal domain
PF10557	1	Cullin protein neddylation domain
PF09995	1	Uncharacterized protein conserved in bacteria (DUF2236)
PF02629	1	CoA binding domain
PF03501	1	Plectin/S10 domain
PF00750	1	tRNA synthetases class I (R)
PF06367	1	Diaphanous FH3 Domain
PF09404	1	Eukaryotic protein of unknown function (DUF2003)
PF13926	1	Domain of unknown function (DUF4211)
PF13881	1	Ubiquitin-2 like Rad60 SUMO-like
PF14698	1	Argininosuccinate lyase C-terminal
PF16893	1	Fibronectin type III domain
PF10596	1	U6-snRNA interacting domain of PrP8
PF01300	1	Telomere recombination
PF09444	1	MRC1-like domain
PF05743	1	UEV domain
PF05026	1	Dcp2, box A domain
PF07876	1	Stress responsive A/B Barrel Domain
PF06159	1	Protein of unknown function (DUF974)
PF04004	1	Leo1-like protein
PF02204	1	Vacuolar sorting protein 9 (VPS9) domain
PF00581	1	Rhodanese-like domain
PF06046	1	Exocyst complex component Sec6
PF11735	1	Cryptococcal mannosyltransferase 1
PF01846	1	FF domain
PF03987	1	Autophagocytosis associated protein, active-site domain
PF07923	1	N1221-like protein
PF00919	1	Uncharacterized protein family UPF0004
PF12436	1	ICP0-binding domain of Ubiquitin-specific protease 7
PF01259	1	SAICAR synthetase
PF16906	1	Ribosomal proteins L26 eukaryotic, L24P archaeal
PF09463	1	Opy2 protein
PF14587	1	O-Glycosyl hydrolase family 30
PF13019	1	Telomere stability and silencing
PF01990	1	ATP synthase (F/14-kDa) subunit
PF07650	1	KH domain
PF05712	1	MRG
PF16294	1	RNSP1-SAP18 binding (RSB) motif
PF03690	1	Uncharacterised protein family (UPF0160)
PF02978	1	Signal peptide binding domain
PF13768	1	von Willebrand factor type A domain
PF08507	1	COPI associated protein
PF10415	1	Fumarase C C-terminus
PF05378	1	Hydantoinase/oxoprolinase N-terminal region
PF09261	1	Alpha mannosidase middle domain
PF11708	1	Pre-mRNA splicing Prp18-interacting factor
PF08618	1	Transcription factor Opi1
PF00275	1	EPSP synthase (3-phosphoshikimate 1-carboxyvinyltransferase)
PF02338	1	OTU-like cysteine protease
PF02747	1	Proliferating cell nuclear antigen, C-terminal domain
PF16457	1	Pleckstrin homology domain
PF11875	1	Domain of unknown function (DUF3395)
PF06883	1	RNA polymerase I, Rpa2 specific domain
PF04802	1	Component of IIS longevity pathway SMK-1
PF08670	1	MEKHLA domain
PF03463	1	eRF1 domain 1
PF08624	1	Chromatin remodelling complex Rsc7/Swp82 subunit
PF13304	1	AAA domain, putative AbiEii toxin, Type IV TA system
PF04377	1	Arginine-tRNA-protein transferase, C terminus
PF13520	1	Amino acid permease
PF00930	1	Dipeptidyl peptidase IV (DPP IV) N-terminal region
PF07508	1	Recombinase
PF03224	1	V-ATPase subunit H
PF16898	1	C-terminal associated domain of TOPRIM
PF01419	1	Jacalin-like lectin domain
PF10342	1	Ser-Thr-rich glycosyl-phosphatidyl-inositol-anchored membrane family
PF09072	1	Translation machinery associated TMA7
PF13398	1	Peptidase M50B-like
PF02260	1	FATC domain
PF10176	1	Protein of unknown function (DUF2370)
PF10261	1	Inositol phospholipid synthesis and fat-storage-inducing TM
PF13242	1	HAD-hyrolase-like
PF04133	1	Vacuolar protein sorting 55
PF17286	1	PRMT5 oligomerisation domain
PF14225	1	Cell morphogenesis C-terminal
PF09830	1	ATP adenylyltransferase
PF16491	1	CAAX prenyl protease N-terminal, five membrane helices
PF07064	1	RIC1
PF08531	1	Alpha-L-rhamnosidase N-terminal domain
PF02749	1	Quinolinate phosphoribosyl transferase, N-terminal domain
PF04086	1	Signal recognition particle, alpha subunit, N-terminal
PF03939	1	Ribosomal protein L23, N-terminal domain
PF02837	1	Glycosyl hydrolases family 2, sugar binding domain
PF03483	1	B3/4 domain
PF11976	1	Ubiquitin-2 like Rad60 SUMO-like
PF04930	1	FUN14 family
PF11841	1	Domain of unknown function (DUF3361)
PF02791	1	DDT domain
PF01925	1	Sulfite exporter TauE/SafE
PF09414	1	RNA ligase
PF16741	1	mRNA-decapping enzyme C-terminus
PF08598	1	Sds3-like
PF12682	1	Flavodoxin
PF02179	1	BAG domain
PF07529	1	HSA
PF03874	1	RNA polymerase Rpb4
PF16916	1	Dimerisation domain of Zinc Transporter
PF08170	1	POPLD (NUC188) domain
PF04032	1	RNAse P Rpr2/Rpp21/SNM1 subunit domain
PF13812	1	Pentatricopeptide repeat domain
PF04062	1	ARP2/3 complex ARPC3 (21 kDa) subunit
PF08149	1	BING4CT (NUC141) domain
PF02836	1	Glycosyl hydrolases family 2, TIM barrel domain
PF03159	1	XRN 5'-3' exonuclease N-terminus
PF12619	1	Mini-chromosome maintenance protein 2
PF15907	1	Integrin-alpha FG-GAP repeat-containing protein 2
PF07539	1	Down-regulated in metastasis
PF04121	1	Nuclear pore protein 84 / 107
PF01784	1	NIF3 (NGG1p interacting factor 3)
PF14370	1	C-terminal topoisomerase domain
PF03540	1	Transcription initiation factor TFIID 23-30kDa subunit
PF00572	1	Ribosomal protein L13
PF03576	1	Peptidase family S58
PF01137	1	RNA 3'-terminal phosphate cyclase
PF00282	1	Pyridoxal-dependent decarboxylase conserved domain
PF01025	1	GrpE
PF00079	1	Serpin (serine protease inhibitor)
PF02777	1	Iron/manganese superoxide dismutases, C-terminal domain
PF09440	1	eIF3 subunit 6 N terminal domain
PF16188	1	C-terminal region of peptidase_M24
PF07993	1	Male sterility protein
PF10312	1	Conserved mid region of cactin
PF03556	1	Cullin binding
PF01608	1	I/LWEQ domain
PF01251	1	Ribosomal protein S7e
PF12777	1	Microtubule-binding stalk of dynein motor
PF10237	1	Probable N6-adenine methyltransferase
PF04889	1	Cwf15/Cwc15 cell cycle control protein
PF07382	1	Histone H1-like nucleoprotein HC2
PF04739	1	5'-AMP-activated protein kinase beta subunit, interaction domain
PF13902	1	R3H-associated N-terminal domain
PF00244	1	14-3-3 protein
PF04065	1	Not1 N-terminal domain, CCR4-Not complex component
PF04762	1	IKI3 family
PF08610	1	Peroxisomal membrane protein (Pex16)
PF11942	1	Spt5 transcription elongation factor, acidic N-terminal
PF08767	1	CRM1 C terminal
PF08771	1	FKBP12-rapamycin binding domain
PF00657	1	GDSL-like Lipase/Acylhydrolase
PF07975	1	TFIIH C1-like domain
PF05719	1	Golgi phosphoprotein 3 (GPP34)
PF08502	1	LeuA allosteric (dimerisation) domain
PF13840	1	ACT domain
PF14560	1	Ubiquitin-like domain
PF04158	1	Sof1-like domain
PF08327	1	Activator of Hsp90 ATPase homolog 1-like protein
PF02970	1	Tubulin binding cofactor A
PF03847	1	Transcription initiation factor TFIID subunit A
PF10508	1	Proteasome non-ATPase 26S subunit
PF05197	1	TRIC channel
PF02153	1	Prephenate dehydrogenase
PF01507	1	Phosphoadenosine phosphosulfate reductase family
PF11712	1	Endoplasmic reticulum-based factor for assembly of V-ATPase
PF05236	1	Transcription initiation factor TFIID component TAF4 family
PF01226	1	Formate/nitrite transporter
PF06415	1	BPG-independent PGAM N-terminus (iPGM_N)
PF03952	1	Enolase, N-terminal domain
PF08285	1	Dolichol-phosphate mannosyltransferase subunit 3 (DPM3)
PF00484	1	Carbonic anhydrase
PF02190	1	ATP-dependent protease La (LON) substrate-binding domain
PF01912	1	eIF-6 family
PF17405	1	Nrap protein nucleotidyltransferase domain 4
PF01409	1	tRNA synthetases class II core domain (F)
PF03081	1	Exo70 exocyst complex subunit
PF13401	1	AAA domain
PF04078	1	Cell differentiation family, Rcd1-like
PF12253	1	Chromatin assembly factor 1 subunit A
PF01187	1	Macrophage migration inhibitory factor (MIF)
PF13725	1	Possible tRNA binding domain
PF02843	1	Phosphoribosylglycinamide synthetase, C domain
PF16884	1	N-terminal domain of oxidoreductase
PF02291	1	Transcription initiation factor IID, 31kD subunit
PF10383	1	Transcription-silencing protein Clr2
PF07524	1	Bromodomain associated
PF06398	1	Integral peroxisomal membrane peroxin
PF13589	1	Histidine kinase-, DNA gyrase B-, and HSP90-like ATPase
PF03153	1	Transcription factor IIA, alpha/beta subunit
PF16187	1	Middle or third domain of peptidase_M16
PF00827	1	Ribosomal L15
PF05064	1	Nsp1-like C-terminal region
PF00204	1	DNA gyrase B
PF10403	1	Rad4 beta-hairpin domain 1
PF01885	1	RNA 2'-phosphotransferase, Tpt1 / KptA family
PF03788	1	LrgA family
PF00026	1	Eukaryotic aspartyl protease
PF08324	1	PUL domain
PF14857	1	TMEM151 family
PF07919	1	Gryzun, putative trafficking through Golgi
PF04729	1	ASF1 like histone chaperone
PF04928	1	Poly(A) polymerase central domain
PF08314	1	Secretory pathway protein Sec39
PF01687	1	Riboflavin kinase
PF01368	1	DHH family
PF10443	1	RNA12 protein
PF13912	1	C2H2-type zinc finger
PF01204	1	Trehalase
PF14656	1	Rab3 GTPase-activating protein regulatory subunit C-terminus
PF06480	1	FtsH Extracellular
PF06202	1	Amylo-alpha-1,6-glucosidase
PF17390	1	Bacterial alpha-L-rhamnosidase C-terminal domain
PF14438	1	Ataxin 2 SM domain
PF17292	1	POB3-like N-terminal PH domain
PF13862	1	p21-C-terminal region-binding protein
PF05856	1	ARP2/3 complex 20 kDa subunit (ARPC4)
PF04981	1	NMD3 family
PF09683	1	Bacteriocin (Lactococcin_972)
PF07933	1	Protein of unknown function (DUF1681)
PF00814	1	Glycoprotease family
PF08231	1	SYF2 splicing factor
PF16206	1	C-terminal region of Mon2 protein
PF02525	1	Flavodoxin-like fold
PF04677	1	Protein similar to CwfJ C-terminus 1
PF04113	1	Gpi16 subunit, GPI transamidase component
PF16573	1	N-terminal beta-sandwich domain of polyadenylation factor
PF16183	1	Kinesin-associated
PF01028	1	Eukaryotic DNA topoisomerase I, catalytic core
PF01086	1	Clathrin light chain
PF16353	1	Domain of unknown function(DUF4981)
PF09223	1	ZinT (YodA) periplasmic lipocalin-like zinc-recruitment
PF00647	1	Elongation factor 1 gamma, conserved domain
PF12473	1	Kinesin protein
PF03719	1	Ribosomal protein S5, C-terminal domain
PF00956	1	Nucleosome assembly protein (NAP)
PF16761	1	Transcription-silencing protein, cryptic loci regulator Clr2
PF01536	1	Adenosylmethionine decarboxylase
PF00834	1	Ribulose-phosphate 3 epimerase family
PF00708	1	Acylphosphatase
PF01634	1	ATP phosphoribosyltransferase
PF02915	1	Rubrerythrin
PF12002	1	MgsA AAA+ ATPase C terminal
PF06732	1	Pescadillo N-terminus
PF11916	1	Vacuolar protein 14 C-terminal Fig4p binding
PF03825	1	Nucleoside H+ symporter
PF08438	1	GTPase of unknown function C-terminal
PF10357	1	Domain of Kin17 curved DNA-binding protein
PF01111	1	Cyclin-dependent kinase regulatory subunit
PF05496	1	Holliday junction DNA helicase ruvB N-terminus
PF03367	1	ZPR1 zinc-finger domain
PF07571	1	TAF6 C-terminal HEAT repeat domain
PF05285	1	SDA1
PF11865	1	Domain of unknown function (DUF3385)
PF13549	1	ATP-grasp domain
PF00730	1	HhH-GPD superfamily base excision DNA repair protein
PF11732	1	Transcription- and export-related complex subunit
PF00366	1	Ribosomal protein S17
PF10360	1	Protein of unknown function (DUF2433)
PF16483	1	Beta-1,3-glucanase
PF05620	1	Protein of unknown function (DUF788)
PF01168	1	Alanine racemase, N-terminal domain
PF04137	1	Endoplasmic Reticulum Oxidoreductin 1 (ERO1)
PF08623	1	TATA-binding protein interacting (TIP20)
PF02181	1	Formin Homology 2 Domain
PF05903	1	PPPDE putative peptidase domain
PF04258	1	Signal peptide peptidase
PF01210	1	NAD-dependent glycerol-3-phosphate dehydrogenase N-terminus
PF02792	1	Mago nashi protein
PF02833	1	DHHA2 domain
PF01557	1	Fumarylacetoacetate (FAA) hydrolase family
PF05625	1	PAXNEB protein
PF16203	1	ERCC3/RAD25/XPB C-terminal helicase
PF00295	1	Glycosyl hydrolases family 28
PF05603	1	Protein of unknown function (DUF775)
PF01875	1	Memo-like protein
PF08514	1	STAG domain
PF04061	1	ORMDL family
PF16892	1	Chitin biosynthesis protein CHS5 N-terminus
PF02213	1	GYF domain
PF03732	1	Retrotransposon gag protein
PF11704	1	Vesicle coat protein involved in Golgi to plasma membrane transport
PF11923	1	Domain of unknown function (DUF3441)
PF16199	1	Radical_SAM C-terminal domain
PF10369	1	Small subunit of acetolactate synthase
PF01777	1	Ribosomal L27e protein family
PF03398	1	Regulator of Vps4 activity in the MVB pathway
PF03371	1	PRP38 family
PF06741	1	LsmAD domain
PF08519	1	Replication factor RFC1 C terminal domain
PF10598	1	RNA recognition motif of the spliceosomal PrP8
PF08603	1	Adenylate cyclase associated (CAP) C terminal
PF01103	1	Surface antigen
PF02929	1	Beta galactosidase small chain
PF04008	1	Adenosine specific kinase
PF17146	1	PIN domain of ribonuclease
PF07728	1	AAA domain (dynein-related subfamily)
PF00281	1	Ribosomal protein L5
PF02064	1	MAS20 protein import receptor
PF04921	1	XAP5, circadian clock regulator
PF01191	1	RNA polymerase Rpb5, C-terminal domain
PF01073	1	3-beta hydroxysteroid dehydrogenase/isomerase family
PF08996	1	DNA Polymerase alpha zinc finger
PF12589	1	Methyltransferase involved in Williams-Beuren syndrome
PF04420	1	CHD5-like protein
PF05179	1	RNA pol II accessory factor, Cdc73 family, C-terminal
PF16122	1	40S ribosomal protein SA C-terminus
PF00585	1	C-terminal regulatory domain of Threonine dehydratase
PF01474	1	Class-II DAHP synthetase family
PF03291	1	mRNA capping enzyme
PF03133	1	Tubulin-tyrosine ligase family
PF00929	1	Exonuclease
PF09769	1	Apolipoprotein O
PF03911	1	Sec61beta family
PF04756	1	OST3 / OST6 family, transporter family
PF05450	1	Nicastrin
PF08737	1	Rgp1
PF00237	1	Ribosomal protein L22p/L17e
PF01394	1	Clathrin propeller repeat
PF04194	1	Programmed cell death protein 2, C-terminal putative domain
PF00764	1	Arginosuccinate synthase
PF10531	1	SLBB domain
PF06858	1	Nucleolar GTP-binding protein 1 (NOG1)
PF12584	1	Trafficking protein particle complex subunit 10, TRAPPC10
PF12745	1	Anticodon binding domain of tRNAs
PF13229	1	Right handed beta helix region
PF04910	1	Transcriptional repressor TCF25
PF14299	1	Phloem protein 2
PF04281	1	Mitochondrial import receptor subunit Tom22
PF08704	1	tRNA methyltransferase complex GCD14 subunit
PF01680	1	SOR/SNZ family
PF09439	1	Signal recognition particle receptor beta subunit
PF01326	1	Pyruvate phosphate dikinase, PEP/pyruvate binding domain
PF15870	1	ElonginA binding-protein 1
PF12738	1	twin BRCT domain
PF09754	1	PAC2 family
PF06479	1	Ribonuclease 2-5A
PF01991	1	ATP synthase (E/31 kDa) subunit
PF02045	1	CCAAT-binding transcription factor (CBF-B/NF-YA) subunit B
PF03807	1	NADP oxidoreductase coenzyme F420-dependent
PF12031	1	SWI/SNF-like complex subunit BAF250/Osa
PF00565	1	Staphylococcal nuclease homologue
PF08569	1	Mo25-like
PF01406	1	tRNA synthetases class I (C) catalytic domain
PF13439	1	Glycosyltransferase Family 4
PF04857	1	CAF1 family ribonuclease
PF00211	1	Adenylate and Guanylate cyclase catalytic domain
PF16193	1	AAA C-terminal domain
PF00209	1	Sodium:neurotransmitter symporter family
PF06881	1	RNA polymerase II transcription factor SIII (Elongin) subunit A
PF00994	1	Probable molybdopterin binding domain
PF03126	1	Plus-3 domain
PF16909	1	Vacuolar-sorting-associated 13 protein C-terminal
PF14619	1	Snf2-ATP coupling, chromatin remodelling complex
PF04056	1	Ssl1-like
PF07792	1	Docking domain of Afi1 for Arf3 in vesicle trafficking
PF10255	1	RNA polymerase I-associated factor PAF67
PF10397	1	Adenylosuccinate lyase C-terminus
PF00239	1	Resolvase, N terminal domain
PF10351	1	Golgi-body localisation protein domain
PF06047	1	Ras-induced vulval development antagonist
PF16979	1	SAPK-interacting protein 1 (Sin1), Pleckstrin-homology
PF13510	1	2Fe-2S iron-sulfur cluster binding domain
PF04733	1	Coatomer epsilon subunit
PF02877	1	Poly(ADP-ribose) polymerase, regulatory domain
PF08501	1	Shikimate dehydrogenase substrate binding domain
PF01532	1	Glycosyl hydrolase family 47
PF16835	1	Pre-mRNA-splicing factor SF3a complex subunit 2 (Prp11)
PF10257	1	Retinoic acid induced 16-like protein
PF01929	1	Ribosomal protein L14
PF13854	1	Kelch motif
PF04124	1	Dor1-like family
PF00425	1	chorismate binding enzyme
PF08202	1	Mis12-Mtw1 protein family
PF03179	1	Vacuolar (H+)-ATPase G subunit
PF05181	1	XPA protein C-terminus
PF00348	1	Polyprenyl synthetase
PF05158	1	RNA polymerase Rpc34 subunit
PF04046	1	PSP
PF02594	1	Uncharacterised ACR, YggU family COG1872
PF08646	1	Replication factor-A C terminal domain
PF08153	1	NGP1NT (NUC091) domain
PF08155	1	NOGCT (NUC087) domain
PF05832	1	Eukaryotic protein of unknown function (DUF846)
PF11816	1	Domain of unknown function (DUF3337)
PF13917	1	Zinc knuckle
PF03348	1	Serine incorporator (Serinc)
PF11698	1	V-ATPase subunit H
PF09668	1	Aspartyl protease
PF10058	1	Predicted integral membrane zinc-ribbon metal-binding protein
PF00888	1	Cullin family
PF01287	1	Eukaryotic elongation factor 5A hypusine, DNA-binding OB fold
PF06093	1	Spt4/RpoE2 zinc finger
PF04388	1	Hamartin protein
PF10159	1	Kinase phosphorylation protein
PF04082	1	Fungal specific transcription factor domain
PF02840	1	Prp18 domain
PF01465	1	GRIP domain
PF02548	1	Ketopantoate hydroxymethyltransferase
PF04574	1	Protein of unknown function (DUF592)
PF01261	1	Xylose isomerase-like TIM barrel
PF08920	1	Splicing factor 3B subunit 1
PF02156	1	Glycosyl hydrolase family 26
PF04615	1	Utp14 protein
PF01344	1	Kelch motif
PF12353	1	Eukaryotic translation initiation factor 3 subunit G
PF15801	1	zf-MYND-like zinc finger, mRNA-binding
PF06058	1	Dcp1-like decapping family
PF10375	1	GRIP-related Arf-binding domain
PF02919	1	Eukaryotic DNA topoisomerase I, DNA binding fragment
PF16782	1	Nucleotide exchange factor SIL1
PF01247	1	Ribosomal protein L35Ae
PF03871	1	RNA polymerase Rpb5, N-terminal domain
PF12157	1	Protein of unknown function (DUF3591)
PF08698	1	Fcf2 pre-rRNA processing
PF04127	1	DNA / pantothenate metabolism flavoprotein
PF04557	1	Glutaminyl-tRNA synthetase, non-specific RNA binding region part 2
PF08759	1	Glycosyltransferase GT-D fold
PF16900	1	Replication protein A OB domain
PF00230	1	Major intrinsic protein
PF08144	1	CPL (NUC119) domain
PF15985	1	KH domain
PF12108	1	Splicing factor SF3a60 binding domain
PF02109	1	DAD family
PF14360	1	PAP2 superfamily C-terminal
PF14533	1	Ubiquitin-specific protease C-terminal
PF01068	1	ATP dependent DNA ligase domain
PF04493	1	Endonuclease V
PF03849	1	Transcription factor Tfb2
PF05346	1	Eukaryotic membrane protein family
PF16488	1	Argonaute linker 2 domain
PF08752	1	Coatomer gamma subunit appendage platform subdomain
PF00939	1	Sodium:sulfate symporter transmembrane region
PF02268	1	Transcription initiation factor IIA, gamma subunit, helical domain
PF01488	1	Shikimate / quinate 5-dehydrogenase
PF12612	1	Tubulin folding cofactor D C terminal
PF13874	1	Nucleoporin complex subunit 54
PF10381	1	Autophagocytosis associated protein C-terminal
PF06110	1	Eukaryotic protein of unknown function (DUF953)
PF02089	1	Palmitoyl protein thioesterase
PF06371	1	Diaphanous GTPase-binding Domain
PF08590	1	Domain of unknown function (DUF1771)
PF03590	1	Aspartate-ammonia ligase
PF11722	1	CCCH zinc finger in TRM13 protein
PF13350	1	Tyrosine phosphatase family
PF10347	1	RNA pol II promoter Fmp27 protein domain
PF08068	1	DKCLD (NUC011) domain
PF10343	1	Potential Queuosine, Q, salvage protein family
PF02574	1	Homocysteine S-methyltransferase
PF03660	1	PHF5-like protein
PF03297	1	S25 ribosomal protein
PF08071	1	RS4NT (NUC023) domain
PF01713	1	Smr domain
PF09333	1	Autophagy-related protein C terminal domain
PF06424	1	PRP1 splicing factor, N-terminal
PF12874	1	Zinc-finger of C2H2 type
PF01142	1	tRNA pseudouridine synthase D (TruD)
PF02862	1	DDHD domain
PF07200	1	Modifier of rudimentary (Mod(r)) protein
PF04157	1	EAP30/Vps36 family
PF03715	1	Noc2p family
PF01256	1	Carbohydrate kinase
PF05291	1	Bystin
PF00416	1	Ribosomal protein S13/S18
PF03645	1	Tctex-1 family
PF14838	1	Integrator complex subunit 5 C-terminus
PF08784	1	Replication protein A C terminal
PF08385	1	Dynein heavy chain, N-terminal region 1
PF15459	1	60S ribosome biogenesis protein Rrp14
PF13299	1	Cleavage and polyadenylation factor 2 C-terminal
PF00728	1	Glycosyl hydrolase family 20, catalytic domain
PF06658	1	Protein of unknown function (DUF1168)
PF00285	1	Citrate synthase, C-terminal domain
PF01233	1	Myristoyl-CoA:protein N-myristoyltransferase, N-terminal domain
PF10366	1	Vacuolar sorting protein 39 domain 1
PF04376	1	Arginine-tRNA-protein transferase, N terminus
PF12309	1	KIF-1 binding protein C terminal
PF13423	1	Ubiquitin carboxyl-terminal hydrolase
PF11957	1	THO complex subunit 1 transcription elongation factor
PF13638	1	PIN domain
PF14474	1	RTC4-like domain
PF06699	1	GPI biosynthesis protein family Pig-F
PF17135	1	Ribosomal protein 60S L18 and 50S L18e
PF06544	1	Protein of unknown function (DUF1115)
PF04037	1	Domain of unknown function (DUF382)
PF09454	1	Vps23 core domain
PF09649	1	Histone chaperone domain CHZ
PF04931	1	DNA polymerase phi
PF16575	1	mRNA cleavage and polyadenylation factor CLP1 P-loop
PF03484	1	tRNA synthetase B5 domain
PF09430	1	Protein of unknown function (DUF2012)
PF06814	1	Lung seven transmembrane receptor
PF04675	1	DNA ligase N terminus
PF10180	1	Uncharacterised conserved protein (DUF2373)
PF09797	1	N-acetyltransferase B complex (NatB) non catalytic subunit
PF09262	1	Peroxisome biogenesis factor 1, N-terminal
PF00648	1	Calpain family cysteine protease
PF02913	1	FAD linked oxidases, C-terminal domain
PF02403	1	Seryl-tRNA synthetase N-terminal domain
PF01509	1	TruB family pseudouridylate synthase (N terminal domain)
PF06728	1	GPI transamidase subunit PIG-U
PF01564	1	Spermine/spermidine synthase domain
PF01981	1	Peptidyl-tRNA hydrolase PTH2
PF13886	1	Domain of unknown function (DUF4203)
PF08642	1	Histone deacetylation protein Rxt3
PF10392	1	Golgi transport complex subunit 5
PF05406	1	WGR domain
PF05186	1	Dpy-30 motif
PF03451	1	HELP motif
PF01061	1	ABC-2 type transporter
PF03881	1	Fructosamine kinase
PF17034	1	Zinc-ribbon like family
PF01487	1	Type I 3-dehydroquinase
PF01149	1	Formamidopyrimidine-DNA glycosylase N-terminal domain
PF05502	1	Dynactin p62 family
PF03399	1	SAC3/GANP family
PF02434	1	Fringe-like
PF15613	1	Williams-Beuren syndrome DDT (WSD), D-TOX E motif
PF00215	1	Orotidine 5'-phosphate decarboxylase / HUMPS family
PF04006	1	Mpp10 protein
PF13869	1	Nucleotide hydrolase
PF14699	1	N-terminal domain from the human glycogen debranching enzyme
PF03070	1	TENA/THI-4/PQQC family
PF03813	1	Nrap protein domain 1
PF01223	1	DNA/RNA non-specific endonuclease
PF12813	1	XPG domain containing
PF12247	1	Temperature dependent protein affecting M2 dsRNA replication
PF16205	1	Ribosomal_S17 N-terminal
PF02142	1	MGS-like domain
PF01282	1	Ribosomal protein S24e
PF05822	1	Pyrimidine 5'-nucleotidase (UMPH-1)
PF09229	1	Activator of Hsp90 ATPase, N-terminal
PF03941	1	Inner centromere protein, ARK binding region
PF13831	1	PHD-finger
PF08506	1	Cse1
PF01205	1	Uncharacterized protein family UPF0029
PF05786	1	Condensin complex subunit 2
PF01416	1	tRNA pseudouridine synthase
PF08713	1	DNA alkylation repair enzyme
PF01159	1	Ribosomal protein L6e
PF00831	1	Ribosomal L29 protein
PF13430	1	Domain of unknown function (DUF4112)
PF02894	1	Oxidoreductase family, C-terminal alpha/beta domain
PF00644	1	Poly(ADP-ribose) polymerase catalytic domain
PF13607	1	Succinyl-CoA ligase like flavodoxin domain
PF16275	1	Splicing factor 1 helix-hairpin domain
PF02152	1	Dihydroneopterin aldolase
PF05028	1	Poly (ADP-ribose) glycohydrolase (PARG)
PF01731	1	Arylesterase
PF02569	1	Pantoate-beta-alanine ligase
PF00102	1	Protein-tyrosine phosphatase
PF12271	1	Chitin synthase III catalytic subunit
PF17406	1	Nrap protein PAP/OAS1-like domain 5
PF12044	1	Putative peptidase family
PF16796	1	Microtubule binding
PF05907	1	Eukaryotic protein of unknown function (DUF866)
PF06229	1	FRG1-like domain
PF08433	1	Chromatin associated protein KTI12
PF03946	1	Ribosomal protein L11, N-terminal domain
PF04547	1	Calcium-activated chloride channel
PF01791	1	DeoC/LacD family aldolase
PF09273	1	Rubisco LSMT substrate-binding
PF05691	1	Raffinose synthase or seed imbibition protein Sip1
PF09070	1	PFU (PLAA family ubiquitin binding)
PF14523	1	Syntaxin-like protein
PF04874	1	Mak16 protein C-terminal region
PF02632	1	BioY family
PF05817	1	Oligosaccharyltransferase subunit Ribophorin II
PF04064	1	Domain of unknown function (DUF384)
PF08542	1	Replication factor C C-terminal domain
PF06870	1	A49-like RNA polymerase I associated factor
PF05879	1	Root hair defective 3 GTP-binding protein (RHD3)
PF10310	1	Family of unknown function (DUF5427)
PF16134	1	THO complex subunit 2 N-terminus
PF04387	1	Protein tyrosine phosphatase-like protein, PTPLA
PF00303	1	Thymidylate synthase
PF00828	1	Ribosomal proteins 50S-L15, 50S-L18e, 60S-L27A
PF12838	1	4Fe-4S dicluster domain
PF14712	1	Snapin/Pallidin
PF05002	1	SGS domain
PF08393	1	Dynein heavy chain, N-terminal region 2
PF01106	1	NifU-like domain
PF03998	1	Utp11 protein
PF02492	1	CobW/HypB/UreG, nucleotide-binding domain
PF14520	1	Helix-hairpin-helix domain
PF05859	1	Mis12 protein
PF04073	1	Aminoacyl-tRNA editing domain
PF17125	1	N-terminal domain of 16S rRNA methyltransferase RsmF
PF00705	1	Proliferating cell nuclear antigen, N-terminal domain
PF14062	1	Domain of unknown function (DUF4253)
PF00459	1	Inositol monophosphatase family
PF03208	1	PRA1 family protein
PF02138	1	Beige/BEACH domain
PF14260	1	C4-type zinc-finger of DNA polymerase delta
PF13934	1	Nuclear pore complex assembly
PF03332	1	Eukaryotic phosphomannomutase
PF10455	1	Bin/amphiphysin/Rvs domain for vesicular trafficking
PF00935	1	Ribosomal protein L44
PF00586	1	AIR synthase related protein, N-terminal domain
PF06978	1	Ribonucleases P/MRP protein subunit POP1
PF02115	1	RHO protein GDP dissociation inhibitor
PF01074	1	Glycosyl hydrolases family 38 N-terminal domain
PF08647	1	BRE1 E3 ubiquitin ligase
PF14666	1	Rapamycin-insensitive companion of mTOR, middle domain
PF16282	1	SANT/Myb-like domain of DAMP1
PF03009	1	Glycerophosphoryl diester phosphodiesterase family
PF04676	1	Protein similar to CwfJ C-terminus 2
PF05222	1	Alanine dehydrogenase/PNT, N-terminal domain
PF04280	1	Tim44-like domain
PF08232	1	Striatin family
PF08267	1	Cobalamin-independent synthase, N-terminal domain
PF10408	1	Ubiquitin elongating factor core
PF00658	1	Poly-adenylate binding protein, unique domain
PF00333	1	Ribosomal protein S5, N-terminal domain
PF16004	1	116 kDa U5 small nuclear ribonucleoprotein component N-terminus
PF00810	1	ER lumen protein retaining receptor
PF04419	1	4F5 protein family
PF00319	1	SRF-type transcription factor (DNA-binding and dimerisation domain)
PF01697	1	Glycosyltransferase family 92
PF12733	1	Cadherin-like beta sandwich domain
PF11265	1	Mediator complex subunit 25 von Willebrand factor type A
PF08321	1	PPP5 TPR repeat region
PF16050	1	Paf1 complex subunit CDC73 N-terminal
PF03194	1	LUC7 N_terminus
PF04088	1	Peroxin 13, N-terminal region
PF09402	1	Man1-Src1p-C-terminal domain
PF16121	1	40S ribosomal protein S4 C-terminus
PF14374	1	60S ribosomal protein L4 C-terminal domain
PF12775	1	P-loop containing dynein motor region D3
PF01192	1	RNA polymerase Rpb6
PF02598	1	Putative RNA methyltransferase
PF16969	1	RNA-binding signal recognition particle 68
PF00043	1	Glutathione S-transferase, C-terminal domain
PF15454	1	Late endosomal/lysosomal adaptor and MAPK and MTOR activator
PF15901	1	Sortilin, neurotensin receptor 3, C-terminal
PF11831	1	pre-mRNA splicing factor component
PF07780	1	Spb1 C-terminal domain
PF03447	1	Homoserine dehydrogenase, NAD binding domain
PF12755	1	Vacuolar 14 Fab1-binding region
PF02018	1	Carbohydrate binding domain
PF04558	1	Glutaminyl-tRNA synthetase, non-specific RNA binding region part 1
PF10559	1	Plug domain of Sec61p
PF00302	1	Chloramphenicol acetyltransferase
PF17102	1	Stealth protein CR3, conserved region 3
PF09320	1	Domain of unknown function (DUF1977)
PF15477	1	Small acidic protein family
PF02844	1	Phosphoribosylglycinamide synthetase, N domain
PF06777	1	Helical and beta-bridge domain
PF09423	1	PhoD-like phosphatase
PF08825	1	E2 binding domain
PF01125	1	G10 protein
PF04841	1	Vps16, N-terminal region
PF01599	1	Ribosomal protein S27a
PF01645	1	Conserved region in glutamate synthase
PF01169	1	Uncharacterized protein family UPF0016
PF13870	1	Domain of unknown function (DUF4201)
PF00731	1	AIR carboxylase
PF03725	1	3' exoribonuclease family, domain 2
PF12774	1	Hydrolytic ATP binding site of dynein motor region D1
PF01813	1	ATP synthase subunit D
PF05129	1	Transcription elongation factor Elf1 like
PF03733	1	Inner membrane component domain
PF11605	1	Vacuolar protein sorting protein 36 Vps36
PF13838	1	Clathrin-H-link
PF05021	1	NPL4 family
PF08616	1	Stabilization of polarity axis
PF03105	1	SPX domain
PF05020	1	NPL4 family, putative zinc binding region
PF03465	1	eRF1 domain 3
PF00373	1	FERM central domain
PF08658	1	Rad54 N terminal
PF09368	1	Sas10 C-terminal domain
PF02774	1	Semialdehyde dehydrogenase, dimerisation domain
PF16546	1	Homodimerisation domain of SGTA
PF06427	1	UDP-glucose:Glycoprotein Glucosyltransferase
PF05997	1	Nucleolar protein,Nop52
PF05348	1	Proteasome maturation factor UMP1
PF16198	1	tRNA pseudouridylate synthase B C-terminal domain
PF08588	1	Protein of unknown function (DUF1769)
PF02037	1	SAP domain
PF00792	1	Phosphoinositide 3-kinase C2
PF13243	1	Squalene-hopene cyclase C-terminal domain
PF10233	1	Uncharacterized conserved protein CG6151-P
PF00347	1	Ribosomal protein L6
PF10359	1	RNA pol II promoter Fmp27 protein domain
PF06419	1	Conserved oligomeric complex COG6
PF03641	1	Possible lysine decarboxylase
PF08606	1	Prp19/Pso4-like
PF16399	1	Intron-binding protein aquarius N-terminus
PF05891	1	AdoMet dependent proline di-methyltransferase
PF14222	1	Cell morphogenesis N-terminal
PF09325	1	Vps5 C terminal like
PF16528	1	Exocyst component 84 C-terminal
PF08418	1	DNA polymerase alpha subunit B N-terminal
PF04192	1	Utp21 specific WD40 associated putative domain
PF07767	1	Nop53 (60S ribosomal biogenesis)
PF03909	1	BSD domain
PF00588	1	SpoU rRNA Methylase family
PF11262	1	Transcription factor/nuclear export subunit protein 2
PF03635	1	Vacuolar protein sorting-associated protein 35
PF08161	1	NUC173 domain
PF17284	1	Spermidine synthase tetramerisation domain
PF09736	1	Pre-mRNA-splicing factor of RES complex
PF02580	1	D-Tyr-tRNA(Tyr) deacylase
PF06201	1	PITH domain
PF04502	1	Family of unknown function (DUF572)
PF10338	1	Protein of unknown function (DUF2423)
PF06472	1	ABC transporter transmembrane region 2
PF08118	1	Yeast mitochondrial distribution and morphology (MDM) proteins
PF03378	1	CAS/CSE protein, C-terminus
PF05253	1	U11-48K-like CHHC zinc finger
PF00306	1	ATP synthase alpha/beta chain, C terminal domain
PF02902	1	Ulp1 protease family, C-terminal catalytic domain
PF01902	1	Diphthamide synthase
PF00742	1	Homoserine dehydrogenase
PF01512	1	Respiratory-chain NADH dehydrogenase 51 Kd subunit
PF04034	1	Ribosome biogenesis protein, C-terminal
PF10165	1	Guanine nucleotide exchange factor synembryn
PF09066	1	Beta2-adaptin appendage, C-terminal sub-domain
PF09337	1	His(2)-Cys(2) zinc finger
PF12022	1	Domain of unknown function (DUF3510)
PF09202	1	Rio2, N-terminal
PF08523	1	Multiprotein bridging factor 1
PF00181	1	Ribosomal Proteins L2, RNA binding domain
PF04614	1	Pex19 protein family
PF00692	1	dUTPase
PF16886	1	ATPsynthase alpha/beta subunit N-term extension
PF00352	1	Transcription factor TFIID (or TATA-binding protein, TBP)
PF14538	1	Raptor N-terminal CASPase like domain
PF03481	1	Putative GTP-binding controlling metal-binding
PF12070	1	Protein SCAI
PF04935	1	Surfeit locus protein 6
PF07039	1	SGF29 tudor-like domain
PF01603	1	Protein phosphatase 2A regulatory B subunit (B56 family)
PF15811	1	Small VCP/p97-interacting protein
PF06682	1	SOCE-associated regulatory factor of calcium homoeostasis
PF08244	1	Glycosyl hydrolases family 32 C terminal
PF00391	1	PEP-utilising enzyme, mobile domain
PF13483	1	Beta-lactamase superfamily domain
PF00659	1	POLO box duplicated region
PF12907	1	Zinc-binding
PF14844	1	PH domain associated with Beige/BEACH
PF14701	1	Glycogen debranching enzyme, glucanotransferase domain
PF12701	1	Scd6-like Sm domain
PF06417	1	Protein of unknown function (DUF1077)
PF04851	1	Type III restriction enzyme, res subunit
PF09507	1	DNA polymerase subunit Cdc27
PF08147	1	DBP10CT (NUC160) domain
PF13249	1	Squalene-hopene cyclase N-terminal domain
PF11543	1	Nuclear pore localisation protein NPL4
PF16470	1	Peptidase S8 pro-domain
PF00926	1	3,4-dihydroxy-2-butanone 4-phosphate synthase
PF02953	1	Tim10/DDP family zinc finger
PF02184	1	HAT (Half-A-TPR) repeat
PF14826	1	FACT complex subunit SPT16 N-terminal lobe domain
PF16978	1	SAPK-interacting protein 1 (Sin1), middle CRIM domain
PF00668	1	Condensation domain
PF09110	1	HAND
PF01249	1	Ribosomal protein S21e
PF14498	1	Glycosyl hydrolase family 65, N-terminal domain
PF00494	1	Squalene/phytoene synthase
PF09296	1	NADH pyrophosphatase-like rudimentary NUDIX domain
PF00327	1	Ribosomal protein L30p/L7e
PF02969	1	TATA box binding protein associated factor (TAF)
PF01776	1	Ribosomal L22e protein family
PF06733	1	DEAD_2
PF02230	1	Phospholipase/Carboxylesterase
PF00177	1	Ribosomal protein S7p/S5e
PF00121	1	Triosephosphate isomerase
PF11699	1	Mif2/CENP-C like
PF05282	1	AAR2 protein
PF15469	1	Exocyst complex component Sec5
PF10296	1	Maintenance of mitochondrial morphology protein 1
PF02450	1	Lecithin:cholesterol acyltransferase
PF17403	1	Nrap protein PAP/OAS-like domain
PF00677	1	Lumazine binding domain
PF09268	1	Clathrin, heavy-chain linker
PF01612	1	3'-5' exonuclease
PF01803	1	LIM-domain binding protein
PF12781	1	ATP-binding dynein motor region D5
PF17389	1	Bacterial alpha-L-rhamnosidase 6 hairpin glycosidase domain
PF00388	1	Phosphatidylinositol-specific phospholipase C, X domain
PF00639	1	PPIC-type PPIASE domain
PF02550	1	Acetyl-CoA hydrolase/transferase N-terminal domain
PF06325	1	Ribosomal protein L11 methyltransferase (PrmA)
PF07748	1	Glycosyl hydrolases family 38 C-terminal domain
PF01202	1	Shikimate kinase
PF04389	1	Peptidase family M28
PF14377	1	Domain of unknown function (DUF4414)
PF00166	1	Chaperonin 10 Kd subunit
PF08777	1	RNA binding motif
PF08313	1	SCA7, zinc-binding domain
PF17122	1	Zinc-finger
PF10224	1	Predicted coiled-coil protein (DUF2205)
PF09429	1	WW domain binding protein 11
PF00609	1	Diacylglycerol kinase accessory domain
PF05958	1	tRNA (Uracil-5-)-methyltransferase
PF02627	1	Carboxymuconolactone decarboxylase family
PF03943	1	TAP C-terminal domain
PF04147	1	Nop14-like family
PF02223	1	Thymidylate kinase
PF01565	1	FAD binding domain
PF01743	1	Poly A polymerase head domain
PF13832	1	PHD-zinc-finger like domain
PF00857	1	Isochorismatase family
PF14748	1	Pyrroline-5-carboxylate reductase dimerisation
PF00900	1	Ribosomal family S4e
PF09997	1	Predicted membrane protein (DUF2238)
PF08492	1	SRP72 RNA-binding domain
PF13302	1	Acetyltransferase (GNAT) domain
PF13599	1	Pentapeptide repeats (9 copies)
PF00072	1	Response regulator receiver domain
PF09451	1	Autophagy-related protein 27
PF03435	1	Saccharopine dehydrogenase NADP binding domain
PF13671	1	AAA domain
PF02861	1	Clp amino terminal domain, pathogenicity island component
PF01288	1	7,8-dihydro-6-hydroxymethylpterin-pyrophosphokinase (HPPK)
PF11882	1	Domain of unknown function (DUF3402)
PF00573	1	Ribosomal protein L4/L1 family
PF08082	1	PRO8NT (NUC069), PrP8 N-terminal domain
PF02270	1	Transcription initiation factor IIF, beta subunit
PF02540	1	NAD synthase
PF12246	1	Temperature dependent protein affecting M2 dsRNA replication
PF10217	1	Uncharacterized conserved protein (DUF2039)
PF04627	1	Mitochondrial ATP synthase epsilon chain
PF01741	1	Large-conductance mechanosensitive channel, MscL
PF11931	1	Domain of unknown function (DUF3449)
PF07928	1	Vps54-like protein
PF04667	1	cAMP-regulated phosphoprotein/endosulfine conserved region
PF12295	1	Symplekin tight junction protein C terminal
PF04084	1	Origin recognition complex subunit 2
PF08712	1	Scaffold protein Nfu/NifU N terminal
PF00917	1	MATH domain
PF00081	1	Iron/manganese superoxide dismutases, alpha-hairpin domain
PF10350	1	Putative death-receptor fusion protein (DUF2428)
PF09750	1	Alternative splicing regulator
PF04801	1	Sin-like protein conserved region
PF03061	1	Thioesterase superfamily
PF02567	1	Phenazine biosynthesis-like protein
PF08442	1	ATP-grasp domain
PF00885	1	6,7-dimethyl-8-ribityllumazine synthase
PF04699	1	ARP2/3 complex 16 kDa subunit (p16-Arc)
PF04926	1	Poly(A) polymerase predicted RNA binding domain
PF12735	1	TRAPP trafficking subunit Trs65
PF05493	1	ATP synthase subunit H
PF01627	1	Hpt domain
PF12814	1	Meiotic cell cortex C-terminal pleckstrin homology
PF13650	1	Aspartyl protease
PF03656	1	Pam16
PF15409	1	Pleckstrin homology domain
PF02823	1	ATP synthase, Delta/Epsilon chain, beta-sandwich domain
PF09794	1	Transport protein Avl9
PF01257	1	Thioredoxin-like [2Fe-2S] ferredoxin
PF09334	1	tRNA synthetases class I (M)
PF13344	1	Haloacid dehalogenase-like hydrolase
PF12569	1	NMDA receptor-regulated protein 1
PF00202	1	Aminotransferase class-III
PF09732	1	Cactus-binding C-terminus of cactin protein
PF03879	1	Cgr1 family
PF13656	1	RNA polymerase Rpb3/Rpb11 dimerisation domain
PF04114	1	Gaa1-like, GPI transamidase component
PF00297	1	Ribosomal protein L3
PF13307	1	Helicase C-terminal domain
PF08783	1	DWNN domain
PF09173	1	Initiation factor eIF2 gamma, C terminal
PF01968	1	Hydantoinase/oxoprolinase
PF05605	1	Drought induced 19 protein (Di19), zinc-binding
PF01644	1	Chitin synthase
PF02005	1	N2,N2-dimethylguanosine tRNA methyltransferase
PF02803	1	Thiolase, C-terminal domain
PF14632	1	Acidic N-terminal SPT6
PF01451	1	Low molecular weight phosphotyrosine protein phosphatase
PF01172	1	Shwachman-Bodian-Diamond syndrome (SBDS) protein
PF09763	1	Exocyst complex component Sec3
PF09416	1	RNA helicase (UPF2 interacting domain)
PF07541	1	Eukaryotic translation initiation factor 2 alpha subunit
PF00458	1	WHEP-TRS domain
PF16213	1	Dimerisation and cyclophilin-binding domain of Mon2
PF03485	1	Arginyl tRNA synthetase N terminal domain
PF08029	1	HisG, C-terminal domain
PF01198	1	Ribosomal protein L31e
PF08565	1	Cdc37 Hsp90 binding domain
PF02538	1	Hydantoinase B/oxoprolinase
PF00568	1	WH1 domain
PF11701	1	Myosin-binding striated muscle assembly central
PF04152	1	Mre11 DNA-binding presumed domain
PF08772	1	Nin one binding (NOB1) Zn-ribbon like
PF08083	1	PROCN (NUC071) domain
PF07926	1	TPR/MLP1/MLP2-like protein
PF04791	1	LMBR1-like membrane protein
PF04840	1	Vps16, C-terminal region
PF15277	1	Exocyst complex component SEC3 N-terminal PIP2 binding PH
PF09263	1	Peroxisome biogenesis factor 1, N-terminal
PF07942	1	N2227-like protein
PF11711	1	Inner membrane protein import complex subunit Tim54
PF05185	1	PRMT5 arginine-N-methyltransferase
PF02799	1	Myristoyl-CoA:protein N-myristoyltransferase, C-terminal domain
PF03343	1	SART-1 family
PF15365	1	Proline-rich nuclear receptor coactivator motif
PF09785	1	Prp31 C terminal domain
PF16944	1	Fungal potassium channel
PF03311	1	Cornichon protein
PF08577	1	PI31 proteasome regulator
PF01725	1	Ham1 family
PF05008	1	Vesicle transport v-SNARE protein N-terminus
PF06487	1	Sin3 associated polypeptide p18 (SAP18)
PF09435	1	Fungal protein of unknown function (DUF2015)
PF07808	1	RED-like protein N-terminal region
PF09377	1	SBDS protein C-terminal domain
PF04683	1	Proteasome complex subunit Rpn13 ubiquitin receptor
PF16692	1	Folliculin C-terminal domain
PF01131	1	DNA topoisomerase
PF05221	1	S-adenosyl-L-homocysteine hydrolase
PF14664	1	Rapamycin-insensitive companion of mTOR, N-term
PF13328	1	HD domain
PF13324	1	Grap2 and cyclin-D-interacting
PF04824	1	Conserved region of Rad21 / Rec8 like protein
PF10143	1	2,3-bisphosphoglycerate-independent phosphoglycerate mutase
PF08911	1	NUP50 (Nucleoporin 50 kDa)
PF16653	1	Saccharopine dehydrogenase C-terminal domain
PF04050	1	Up-frameshift suppressor 2
PF12230	1	Pre-mRNA splicing factor PRP21 like protein
PF01381	1	Helix-turn-helix
PF14691	1	Dihydroprymidine dehydrogenase domain II, 4Fe-4S cluster
PF00867	1	XPG I-region
PF01071	1	Phosphoribosylglycinamide synthetase, ATP-grasp (A) domain
PF00342	1	Phosphoglucose isomerase
PF01916	1	Deoxyhypusine synthase
PF13931	1	Kinesin-associated microtubule-binding
PF03959	1	Serine hydrolase (FSH1)
PF02222	1	ATP-grasp domain
PF07819	1	PGAP1-like protein
PF14681	1	Uracil phosphoribosyltransferase
PF02359	1	Cell division protein 48 (CDC48), N-terminal domain
PF08152	1	GUCT (NUC152) domain
PF11861	1	Domain of unknown function (DUF3381)
PF12922	1	non-SMC mitotic condensation complex subunit 1, N-term
PF00344	1	SecY translocase
PF04939	1	Ribosome biogenesis regulatory protein (RRS1)
PF01180	1	Dihydroorotate dehydrogenase
PF04912	1	Dynamitin
PF00364	1	Biotin-requiring enzyme
PF02724	1	CDC45-like protein
PF10153	1	rRNA-processing protein Efg1
PF05592	1	Bacterial alpha-L-rhamnosidase concanavalin-like domain
PF01734	1	Patatin-like phospholipase
PF10510	1	Phosphatidylinositol-glycan biosynthesis class S protein
PF07569	1	TUP1-like enhancer of split
PF05091	1	Eukaryotic translation initiation factor 3 subunit 7 (eIF-3)
PF02966	1	Mitosis protein DIM1
PF10588	1	NADH-ubiquinone oxidoreductase-G iron-sulfur binding region
PF10405	1	Rad4 beta-hairpin domain 3
PF13616	1	PPIC-type PPIASE domain
PF02544	1	3-oxo-5-alpha-steroid 4-dehydrogenase
PF17039	1	Fucosyltransferase, N-terminal
PF10332	1	Protein of unknown function (DUF2418)
PF06246	1	Isy1-like splicing family
PF12210	1	Hepatocyte growth factor-regulated tyrosine kinase substrate
PF00673	1	ribosomal L5P family C-terminus
PF17004	1	Putative TPR-like repeat
PF02554	1	Carbon starvation protein CstA
PF13507	1	CobB/CobQ-like glutamine amidotransferase domain
PF06703	1	Microsomal signal peptidase 25 kDa subunit (SPC25)
PF05499	1	DNA methyltransferase 1-associated protein 1 (DMAP1)
PF08271	1	TFIIB zinc-binding
PF17407	1	Nrap protein domain 6
PF14821	1	Threonine synthase N terminus
PF14724	1	Mitochondrial-associated sphingomyelin phosphodiesterase
PF10291	1	Muniscin C-terminal mu homology domain
PF06102	1	rRNA biogenesis protein RRP36
PF08423	1	Rad51
PF12998	1	Inhibitor of growth proteins N-terminal histone-binding
PF09802	1	Preprotein translocase subunit Sec66
PF01717	1	Cobalamin-independent synthase, Catalytic domain
PF14429	1	C2 domain in Dock180 and Zizimin proteins
PF01238	1	Phosphomannose isomerase type I
PF06172	1	Cupin superfamily (DUF985)
PF14638	1	Folliculin-interacting protein C-terminus
PF15519	1	linker between RRM2 and RRM3 domains in RBM39 protein
PF08609	1	Nucleotide exchange factor Fes1
PF07202	1	T-complex protein 10 C-terminus
PF14378	1	PAP2 superfamily
PF01979	1	Amidohydrolase family
PF08284	1	Retroviral aspartyl protease
PF04679	1	ATP dependent DNA ligase C terminal region
PF02197	1	Regulatory subunit of type II PKA R-subunit
PF14853	1	Fis1 C-terminal tetratricopeptide repeat
PF07159	1	Protein of unknown function (DUF1394)
PF08520	1	Fungal protein of unknown function (DUF1748)
PF01531	1	Glycosyl transferase family 11
PF05018	1	Protein of unknown function (DUF667)
PF00645	1	Poly(ADP-ribose) polymerase and DNA-Ligase Zn-finger region
PF15410	1	Pleckstrin homology domain
PF01039	1	Carboxyl transferase domain
PF06968	1	Biotin and Thiamin Synthesis associated domain
PF03177	1	Non-repetitive/WGA-negative nucleoporin C-terminal
PF03464	1	eRF1 domain 2
PF08553	1	VID27 cytoplasmic protein
PF04968	1	CHORD
PF00251	1	Glycosyl hydrolases family 32 N-terminal domain
PF03439	1	Early transcription elongation factor of RNA pol II, NGN section
PF16837	1	Pre-mRNA-splicing factor SF3A3, of SF3a complex, Prp9
PF05840	1	Bacteriophage replication gene A protein (GPA)
PF07831	1	Pyrimidine nucleoside phosphorylase C-terminal domain
PF10568	1	Outer mitochondrial membrane transport complex protein
PF00410	1	Ribosomal protein S8
PF04869	1	Uso1 / p115 like vesicle tethering protein, head region
PF07264	1	Etoposide-induced protein 2.4 (EI24)
PF03836	1	RasGAP C-terminus
PF00652	1	Ricin-type beta-trefoil lectin domain
PF01161	1	Phosphatidylethanolamine-binding protein
PF13561	1	Enoyl-(Acyl carrier protein) reductase
PF05746	1	DALR anticodon binding domain
PF08648	1	Protein of unknown function (DUF1777)
PF04080	1	Per1-like family
PF10104	1	Di-sulfide bridge nucleocytoplasmic transport domain
PF01652	1	Eukaryotic initiation factor 4E
PF01267	1	F-actin capping protein alpha subunit
PF10354	1	Domain of unknown function (DUF2431)
PF16015	1	Promethin
PF12341	1	Minichromosome loss protein, Mcl1, middle region
PF12739	1	ER-Golgi trafficking TRAPP I complex 85 kDa subunit
PF09729	1	Gti1/Pac2 family
PF12821	1	Threonine/Serine exporter, ThrE
PF03234	1	Cdc37 N terminal kinase binding
PF04495	1	GRASP55/65 PDZ-like domain
PF02252	1	Proteasome activator pa28 beta subunit
PF08572	1	pre-mRNA processing factor 3 (PRP3)
PF10313	1	Uncharacterised protein domain (DUF2415)
PF03542	1	Tuberin
PF02784	1	Pyridoxal-dependent decarboxylase, pyridoxal binding domain
PF02251	1	Proteasome activator pa28 alpha subunit
PF00189	1	Ribosomal protein S3, C-terminal domain
PF04757	1	Pex2 / Pex12 amino terminal region
PF08719	1	Domain of unknown function (DUF1768)
PF08701	1	GNL3L/Grn1 putative GTPase
PF17171	1	Glutathione S-transferase, C-terminal domain
PF03669	1	Uncharacterised protein family (UPF0139)
PF09111	1	SLIDE
PF17187	1	Svf1-like C-terminal lipocalin-like domain
PF00276	1	Ribosomal protein L23
PF14702	1	Central domain of human glycogen debranching enzyme
[truncated: 282 more rows]

## Sheet: Pirrh
#Family	Protein_count	Pfam description		10698
PF02013	370	Cellulose or protein binding domain
PF12796	346	Ankyrin repeats (3 copies)
PF00069	194	Protein kinase domain
PF08757	161	CotH kinase protein
PF00187	136	Chitin recognition protein
PF13855	127	Leucine rich repeat
PF00005	113	ABC transporter
PF00734	102	Fungal cellulose binding domain
PF00400	86	WD domain, G-beta repeat
PF00076	85	RNA recognition motif. (a.k.a. RRM, RBD, or RNP domain)
PF13637	83	Ankyrin repeats (many copies)
PF00501	76	AMP-binding enzyme
PF00271	75	Helicase conserved C-terminal domain
PF00082	59	Subtilase family
PF00457	57	Glycosyl hydrolases family 11
PF00270	52	DEAD/DEAH box helicase
PF01522	48	Polysaccharide deacetylase
PF00003	47	7 transmembrane sweet-taste receptor of 3 GCPR
PF12698	47	ABC-2 family transporter protein
PF00550	45	Phosphopantetheine attachment site
PF00071	44	Ras family
PF00004	44	ATPase family associated with various cellular activities (AAA)
PF02011	43	Glycosyl hydrolase family 48
PF00018	42	SH3 domain
PF01341	42	Glycosyl hydrolases family 6
PF07690	38	Major Facilitator Superfamily
PF00664	38	ABC transporter transmembrane region
PF13416	38	Bacterial extracellular solute-binding protein
PF00168	37	C2 domain
PF00150	37	Cellulase (glycosyl hydrolase family 5)
PF02901	36	Pyruvate formate lyase-like
PF00668	36	Condensation domain
PF14604	36	Variant SH3 domain
PF00665	35	Integrase core domain
PF09820	35	Predicted AAA-ATPase
PF03537	33	Glycoside-hydrolase family GH114
PF00149	33	Calcineurin-like phosphoesterase
PF13193	30	AMP-binding enzyme C-terminal domain
PF13857	29	Ankyrin repeats (many copies)
PF00331	29	Glycosyl hydrolase family 10
PF00226	29	DnaJ domain
PF00078	27	Reverse transcriptase (RNA-dependent DNA polymerase)
PF00169	27	PH domain
PF14200	27	Ricin-type beta-trefoil lectin domain-like
PF00179	26	Ubiquitin-conjugating enzyme
PF00621	26	RhoGEF domain
PF00615	25	Regulator of G protein signaling domain
PF13639	24	Ring finger domain
PF00620	24	RhoGAP domain
PF00240	24	Ubiquitin family
PF00225	24	Kinesin motor domain
PF05649	23	Peptidase family M13
PF14262	23	Carbohydrate-binding domain-containing protein Cthe_2159
PF00079	22	Serpin (serine protease inhibitor)
PF00566	22	Rab-GTPase-TBC domain
PF07727	22	Reverse transcriptase (RNA-dependent DNA polymerase)
PF00155	22	Aminotransferase class I and II
PF00122	22	E1-E2 ATPase
PF02015	22	Glycosyl hydrolase family 45
PF13499	21	EF-hand domain pair
PF00085	21	Thioredoxin
PF00248	20	Aldo/keto reductase family
PF00063	20	Myosin head (motor domain)
PF01431	20	Peptidase family M13
PF12937	20	F-box-like
PF00515	19	Tetratricopeptide repeat
PF13472	19	GDSL-like Lipase/Acylhydrolase family
PF03629	19	Carbohydrate esterase, sialic acid-specific acetylesterase
PF00153	19	Mitochondrial carrier protein
PF02801	18	Beta-ketoacyl synthase, C-terminal domain
PF04616	18	Glycosyl hydrolases family 43
PF05637	18	galactosyl transferase GMA12/MNN10 family
PF00176	18	SNF2 family N-terminal domain
PF13246	18	Cation transport ATPase (P-type)
PF01757	18	Acyltransferase family
PF00012	18	Hsp70 protein
PF00617	17	RasGEF domain
PF00160	17	Cyclophilin type peptidyl-prolyl cis-trans isomerase/CLD
PF00134	17	Cyclin, N-terminal domain
PF00011	17	Hsp20/alpha crystallin family
PF00307	17	Calponin homology (CH) domain
PF03372	17	Endonuclease/Exonuclease/phosphatase family
PF00498	17	FHA domain
PF00109	17	Beta-ketoacyl synthase, N-terminal domain
PF04724	17	Glycosyltransferase family 17
PF00561	17	alpha/beta hydrolase fold
PF03028	17	Dynein heavy chain and region D6 of dynein motor
PF00583	17	Acetyltransferase (GNAT) family
PF08238	16	Sel1 repeat
PF12777	16	Microtubule-binding stalk of dynein motor
PF08011	16	PD-(D/E)XK nuclease superfamily
PF12781	16	ATP-binding dynein motor region D5
PF03142	16	Chitin synthase
PF00135	16	Carboxylesterase family
PF00443	16	Ubiquitin carboxyl-terminal hydrolase
PF01423	16	LSM domain
PF01399	16	PCI domain
PF12780	16	P-loop containing dynein motor region D4
PF00227	15	Proteasome subunit
PF07534	15	TLD
PF12799	15	Leucine Rich repeats (2 copies)
PF00787	15	PX domain
PF00656	15	Caspase domain
PF00023	14	Ankyrin repeat
PF00412	14	LIM domain
PF00856	14	SET domain
PF07717	14	Oligonucleotide/oligosaccharide-binding (OB)-fold
PF00759	14	Glycosyl hydrolase family 9
PF00520	14	Ion transport protein
PF12775	14	P-loop containing dynein motor region D3
PF16212	14	Phospholipid-translocating P-type ATPase C-terminal
PF00130	13	Phorbol esters/diacylglycerol binding domain (C1 domain)
PF00503	13	G-protein alpha subunit
PF00106	13	short chain dehydrogenase
PF01926	13	50S ribosome-binding GTPase
PF00291	13	Pyridoxal-phosphate dependent enzyme
PF00544	13	Pectate lyase
PF04408	13	Helicase associated domain (HA2)
PF00439	13	Bromodomain
PF11380	13	Stealth protein CR2, conserved region 2
PF00022	13	Actin
PF01228	13	Glycine radical
PF00481	13	Protein phosphatase 2C
PF00320	13	GATA zinc finger
PF14223	13	gag-polypeptide of LTR copia-type
PF00622	13	SPRY domain
PF01694	12	Rhomboid family
PF03810	12	Importin-beta N-terminal domain
PF04525	12	LURP-one-related
PF00618	12	RasGEF N-terminal motif
PF12774	12	Hydrolytic ATP binding site of dynein motor region D1
PF08613	12	Cyclin
PF02140	12	Galactose binding lectin domain
PF13606	12	Ankyrin repeat
PF00083	12	Sugar (and other) transporter
PF08282	11	haloacid dehalogenase-like hydrolase
PF04055	11	Radical SAM superfamily
PF02517	11	CAAX protease self-immunity
PF13086	11	AAA domain
PF00514	11	Armadillo/beta-catenin-like repeat
PF13087	11	AAA domain
PF00535	11	Glycosyl transferase family 2
PF00172	11	Fungal Zn(2)-Cys(6) binuclear cluster domain
PF08393	11	Dynein heavy chain, N-terminal region 2
PF16197	11	Ketoacyl-synthetase C-terminal extension
PF00118	11	TCP-1/cpn60 chaperonin family
PF01915	11	Glycosyl hydrolase family 3 C-terminal domain
PF16209	11	Phospholipid-translocating ATPase N-terminal
PF07859	10	alpha/beta hydrolase fold
PF16656	10	Purple acid Phosphatase, N-terminal domain
PF00454	10	Phosphatidylinositol 3- and 4-kinase
PF00735	10	Septin
PF00232	10	Glycosyl hydrolase family 1
PF00009	10	Elongation factor Tu GTP binding domain
PF07728	10	AAA domain (dynein-related subfamily)
PF03211	10	Pectate lyase
PF00505	10	HMG (high mobility group) box
PF05739	10	SNARE domain
PF14310	10	Fibronectin type III-like domain
PF13920	10	Zinc finger, C3HC4 type (RING finger)
PF00493	10	MCM2/3/5 family
PF00385	10	Chromo (CHRromatin Organisation MOdifier) domain
PF01398	10	JAB1/Mov34/MPN/PAD-1 ubiquitin protease
PF14602	10	Hexapeptide repeat of succinyl-transferase
PF00756	10	Putative esterase
PF01585	10	G-patch domain
PF00293	10	NUDIX domain
PF00188	10	Cysteine-rich secretory protein family
PF01602	10	Adaptin N terminal region
PF01412	10	Putative GTPase activating protein for Arf
PF00241	10	Cofilin/tropomyosin-type actin-binding protein
PF00616	10	GTPase-activator protein for Ras-like GTPase
PF00025	10	ADP-ribosylation factor family
PF00933	10	Glycosyl hydrolase family 3 N terminal domain
PF03031	10	NLI interacting factor-like phosphatase
PF14580	10	Leucine-rich repeat
PF16561	10	Glycogen recognition site of AMP-activated protein kinase
PF00782	9	Dual specificity phosphatase, catalytic domain
PF16990	9	Carbohydrate binding module (family 35)
PF11051	9	Mannosyltransferase putative
PF17207	9	MCM OB domain
PF12894	9	Anaphase-promoting complex subunit 4 WD40 domain
PF01145	9	SPFH domain / Band 7 family
PF01490	9	Transmembrane amino acid transporter protein
PF00027	9	Cyclic nucleotide-binding domain
PF12784	9	PD-(D/E)XK nuclease family transposase
PF00191	9	Annexin
PF11901	9	Protein of unknown function (DUF3421)
PF00046	9	Homeobox domain
PF00698	9	Acyl transferase domain
PF12171	9	Zinc-finger double-stranded RNA-binding
PF00632	9	HECT-domain (ubiquitin-transferase)
PF00249	9	Myb-like DNA-binding domain
PF01363	9	FYVE zinc finger
PF00642	9	Zinc finger C-x8-C-x5-C-x3-H type (and similar)
PF07002	9	Copine
PF00557	9	Metallopeptidase family M24
PF00092	9	von Willebrand factor type A domain
PF01753	9	MYND finger
PF01095	9	Pectinesterase
PF00899	8	ThiF family
PF17101	8	Stealth protein CR1, conserved region 1
PF00091	8	Tubulin/FtsZ family, GTPase domain
PF14683	8	Polysaccharide lyase family 4, domain III
PF12464	8	Maltose acetyltransferase
PF00211	8	Adenylate and Guanylate cyclase catalytic domain
PF04082	8	Fungal specific transcription factor domain
PF02156	8	Glycosyl hydrolase family 26
PF04130	8	Spc97 / Spc98 family
PF01529	8	DHHC palmitoyltransferase
PF00397	8	WW domain
PF00233	8	3'5'-cyclic nucleotide phosphodiesterase
PF04564	8	U-box domain
PF12706	8	Beta-lactamase superfamily domain
PF00406	8	Adenylate kinase
PF00534	8	Glycosyl transferases group 1
PF00254	8	FKBP-type peptidyl-prolyl cis-trans isomerase
PF00702	8	haloacid dehalogenase-like hydrolase
PF00013	8	KH domain
PF01369	8	Sec7 domain
PF03144	8	Elongation factor Tu domain 2
PF01556	8	DnaJ C terminal domain
PF00627	8	UBA/TS-N domain
PF00117	8	Glutamine amidotransferase class-I
PF13414	8	TPR repeat
PF13597	7	Anaerobic ribonucleoside-triphosphate reductase
PF16192	7	C-terminal four TMM region of protein-O-mannosyltransferase
PF01553	7	Acyltransferase
PF02260	7	FATC domain
PF02815	7	MIR domain
PF00892	7	EamA-like transporter family
PF00657	7	GDSL-like Lipase/Acylhydrolase
PF07647	7	SAM domain (Sterile alpha motif)
PF08241	7	Methyltransferase domain
PF14551	7	MCM N-terminal domain
PF00128	7	Alpha amylase, catalytic domain
PF02181	7	Formin Homology 2 Domain
PF03732	7	Retrotransposon gag protein
PF02854	7	MIF4G domain
PF02146	7	Sir2 family
PF00689	7	Cation transporting ATPase, C-terminus
PF06371	7	Diaphanous GTPase-binding Domain
PF01428	7	AN1-like Zinc finger
PF16173	7	Domain of unknown function (DUF4874)
PF13923	7	Zinc finger, C3HC4 type (RING finger)
PF00786	7	P21-Rho-binding domain
PF07724	7	AAA domain (Cdc48 subfamily)
PF04969	7	CS domain
PF00010	7	Helix-loop-helix DNA-binding domain
PF08766	7	DEK C terminal domain
PF00433	7	Protein kinase C terminal domain
PF00753	7	Metallo-beta-lactamase superfamily
PF00465	7	Iron-containing alcohol dehydrogenase
PF13848	7	Thioredoxin-like domain
PF10584	7	Proteasome subunit A N-terminal signature
PF01432	7	Peptidase family M3
PF00258	7	Flavodoxin
PF00780	7	CNH domain
PF02149	7	Kinase associated domain 1
PF09394	7	Chagasin family peptidase inhibitor I42
PF00704	7	Glycosyl hydrolases family 18
PF00626	7	Gelsolin repeat
PF00132	7	Bacterial transferase hexapeptide (six repeats)
PF05057	7	Putative serine esterase (DUF676)
PF00611	7	Fes/CIP4, and EFC/F-BAR homology domain
PF04193	7	PQ loop repeat
PF00571	7	CBS domain
PF01843	7	DIL domain
PF14686	7	Polysaccharide lyase family 4, domain II
PF06045	7	Rhamnogalacturonate lyase family
PF03357	7	Snf7
PF01217	7	Clathrin adaptor complex small chain
PF00533	7	BRCA1 C Terminus (BRCT) domain
PF04515	7	Plasma-membrane choline transporter
PF00788	7	Ras association (RalGDS/AF-6) domain
PF00784	7	MyTH4 domain
PF07653	7	Variant SH3 domain
PF00170	7	bZIP transcription factor
PF03953	6	Tubulin C-terminal domain
PF06367	6	Diaphanous FH3 Domain
PF05773	6	RWD domain
PF07738	6	Sad1 / UNC-like C-terminal
PF00637	6	Region in Clathrin and VPS
PF07993	6	Male sterility protein
PF01501	6	Glycosyl transferase family 8
PF00789	6	UBX domain
PF00326	6	Prolyl oligopeptidase family
PF08389	6	Exportin 1-like protein
PF00929	6	Exonuclease
PF03422	6	Carbohydrate binding module (family 6)
PF14703	6	Cytosolic domain of 10TM putative phosphate transporter
PF03931	6	Skp1 family, tetramerisation domain
PF00888	6	Cullin family
PF00623	6	RNA polymerase Rpb1, domain 2
PF02558	6	Ketopantoate reductase PanE/ApbA
PF00808	6	Histone-like transcription factor (CBF/NF-Y) and archaeal histone
PF04983	6	RNA polymerase Rpb1, domain 3
PF02366	6	Dolichyl-phosphate-mannose-protein mannosyltransferase
PF01569	6	PAP2 superfamily
PF12697	6	Alpha/beta hydrolase family
PF16116	6	Domain of unknown function (DUF4832)
PF00334	6	Nucleoside diphosphate kinase
PF00300	6	Histidine phosphatase superfamily (branch 1)
PF03828	6	Cid1 family poly A polymerase
PF12783	6	Guanine nucleotide exchange factor in Golgi transport N-terminal
PF07885	6	Ion channel
PF04998	6	RNA polymerase Rpb1, domain 5
PF13302	6	Acetyltransferase (GNAT) domain
PF01138	6	3' exoribonuclease family, domain 1
PF00690	6	Cation transporter/ATPase, N-terminus
PF08284	6	Retroviral aspartyl protease
PF00628	6	PHD-finger
PF03162	6	Tyrosine phosphatase family
PF03798	6	TLC domain
PF14497	6	Glutathione S-transferase, C-terminal domain
PF13649	6	Methyltransferase domain
PF01547	6	Bacterial extracellular solute-binding protein
PF00724	6	NADH:flavin oxidoreductase / NADH oxidase family
PF00696	6	Amino acid kinase family
PF04433	6	SWIRM domain
PF01189	5	16S rRNA methyltransferase RsmB/F
PF08659	5	KR domain
PF00581	5	Rhodanese-like domain
PF00995	5	Sec1 family
PF00133	5	tRNA synthetases class I (I, L, M and V)
PF03129	5	Anticodon binding domain
PF01920	5	Prefoldin subunit
PF03114	5	BAR domain
PF17035	5	Bromodomain extra-terminal - transcription regulation
PF00610	5	Domain found in Dishevelled, Egl-10, and Pleckstrin (DEP)
PF00575	5	S1 RNA binding domain
PF10294	5	Lysine methyltransferase
PF03143	5	Elongation factor Tu C-terminal domain
PF03133	5	Tubulin-tyrosine ligase family
PF04427	5	Brix domain
PF00335	5	Tetraspanin family
PF04810	5	Sec23/Sec24 zinc finger
PF12848	5	ABC transporter
PF04560	5	RNA polymerase Rpb2, domain 7
PF05193	5	Peptidase M16 inactive domain
PF00428	5	60s Acidic ribosomal protein
PF00056	5	lactate/malate dehydrogenase, NAD binding domain
PF00587	5	tRNA synthetase class II core domain (G, H, P, S and T)
PF03062	5	MBOAT, membrane-bound O-acyltransferase family
PF01554	5	MatE
PF03645	5	Tctex-1 family
PF10431	5	C-terminal, D2-small domain, of ClpB protein
PF05648	5	Peroxisomal biogenesis factor 11 (PEX11)
PF11904	5	GPCR-chaperone
PF01433	5	Peptidase family M1 domain
PF01663	5	Type I phosphodiesterase / nucleotide pyrophosphatase
PF14559	5	Tetratricopeptide repeat
PF13967	5	Late exocytosis, associated with Golgi transport
PF13287	5	Fn3 associated
PF01183	5	Glycosyl hydrolases family 25
PF00850	5	Histone deacetylase domain
PF16661	5	Metallo-beta-lactamase superfamily domain
PF00208	5	Glutamate/Leucine/Phenylalanine/Valine dehydrogenase
PF00373	5	FERM central domain
PF00982	5	Glycosyltransferase family 20
PF02037	5	SAP domain
PF03370	5	Carbohydrate/starch-binding module (family 21)
PF12352	5	Snare region anchored in the vesicle membrane C-terminus
PF08033	5	Sec23/Sec24 beta-sandwich domain
PF01096	5	Transcription factor S-II (TFIIS)
PF00722	5	Glycosyl hydrolases family 16
PF02845	5	CUE domain
PF02893	5	GRAM domain
PF13424	5	Tetratricopeptide repeat
PF01302	5	CAP-Gly domain
PF04811	5	Sec23/Sec24 trunk domain
PF00107	5	Zinc-binding dehydrogenase
PF01008	5	Initiation factor 2 subunit family
PF05000	5	RNA polymerase Rpb1, domain 4
PF12541	5	Protein of unknown function (DUF3737)
PF00562	5	RNA polymerase Rpb2, domain 6
PF04815	5	Sec23/Sec24 helical domain
PF12710	5	haloacid dehalogenase-like hydrolase
PF00996	5	GDP dissociation inhibitor
PF03151	5	Triose-phosphate Transporter family
PF12146	5	Serine aminopeptidase, S33
PF08423	5	Rad51
PF13561	5	Enoyl-(Acyl carrier protein) reductase
PF02020	5	eIF4-gamma/eIF5/eIF2-epsilon
PF02883	5	Adaptin C-terminal domain
PF02463	5	RecF/RecN/SMC N terminal domain
PF01248	5	Ribosomal protein L7Ae/L30e/S12e/Gadd45 family
PF00447	5	HSF-type DNA-binding
PF14572	5	Phosphoribosyl synthetase-associated domain
PF02535	5	ZIP Zinc transporter
PF14765	5	Polyketide synthase dehydratase
PF01476	5	LysM domain
PF01336	5	OB-fold nucleic acid binding domain
PF10996	5	Beta-Casp domain
PF13353	5	4Fe-4S single cluster domain
PF00136	5	DNA polymerase family B
PF13793	5	N-terminal domain of ribose phosphate pyrophosphokinase
PF01504	5	Phosphatidylinositol-4-phosphate 5-Kinase
PF02358	5	Trehalose-phosphatase
PF12763	5	Cytoskeletal-regulatory complex EF hand
PF02714	5	Calcium-dependent channel, 7TM region, putative phosphate
PF01764	5	Lipase (class 3)
PF03330	5	Lytic transglycolase
PF01798	5	snoRNA binding domain, fibrillarin
PF00350	5	Dynamin family
PF02148	5	Zn-finger in ubiquitin-hydrolases and other protein
PF00125	5	Core histone H2A/H2B/H3/H4
PF07670	5	Nucleoside recognition
PF03727	4	Hexokinase
PF10557	4	Cullin protein neddylation domain
PF02204	4	Vacuolar sorting protein 9 (VPS9) domain
PF02806	4	Alpha amylase, C-terminal all-beta domain
PF01150	4	GDA1/CD39 (nucleoside phosphatase) family
PF11838	4	ERAP1-like C-terminal domain
PF00415	4	Regulator of chromosome condensation (RCC1) repeat
PF00650	4	CRAL/TRIO domain
PF02259	4	FAT domain
PF07742	4	BTG family
PF01613	4	Flavin reductase like domain
PF01251	4	Ribosomal protein S7e
PF00694	4	Aconitase C-terminal domain
PF08156	4	NOP5NT (NUC127) domain
PF11969	4	Scavenger mRNA decapping enzyme C-term binding
PF00349	4	Hexokinase
PF13589	4	Histidine kinase-, DNA gyrase B-, and HSP90-like ATPase
PF14623	4	Hint-domain
PF13868	4	Trichohyalin-plectin-homology domain
PF00675	4	Insulinase (Peptidase family M16)
PF00175	4	Oxidoreductase NAD-binding domain
PF13673	4	Acetyltransferase (GNAT) domain
PF12002	4	MgsA AAA+ ATPase C terminal
PF00096	4	Zinc finger, C2H2 type
PF05224	4	NDT80 / PhoG like DNA-binding family
PF12931	4	Sec23-binding domain of Sec16
PF02729	4	Aspartate/ornithine carbamoyltransferase, carbamoyl-P binding domain
PF13385	4	Concanavalin A-like lectin/glucanases superfamily
PF16589	4	BRCT domain, a BRCA1 C-terminus domain
PF01066	4	CDP-alcohol phosphatidyltransferase
PF12756	4	C2H2 type zinc-finger (2 copies)
PF00928	4	Adaptor complexes medium subunit family
PF02128	4	Fungalysin metallopeptidase (M36)
PF00462	4	Glutaredoxin
PF01472	4	PUA domain
PF12738	4	twin BRCT domain
PF00209	4	Sodium:neurotransmitter symporter family
PF07521	4	Zn-dependent metallo-hydrolase RNA specificity domain
PF00389	4	D-isomer specific 2-hydroxyacid dehydrogenase, catalytic domain
PF13646	4	HEAT repeats
PF00773	4	RNB domain
PF04191	4	Phospholipid methyltransferase
PF01466	4	Skp1 family, dimerisation domain
PF00290	4	Tryptophan synthase alpha chain
PF05495	4	CHY zinc finger
PF08385	4	Dynein heavy chain, N-terminal region 1
PF03600	4	Citrate transporter
PF01545	4	Cation efflux family
PF01496	4	V-type ATPase 116kDa subunit family
PF12906	4	RING-variant domain
PF00651	4	BTB/POZ domain
PF16369	4	C-terminal of Glycosyl hydrolases family 43
PF08449	4	UAA transporter family
PF02671	4	Paired amphipathic helix repeat
PF04997	4	RNA polymerase Rpb1, domain 1
PF08513	4	LisH
PF06395	4	CDC24 Calponin
PF01416	4	tRNA pseudouridine synthase
PF00483	4	Nucleotidyl transferase
PF02138	4	Beige/BEACH domain
PF13959	4	Domain of unknown function (DUF4217)
PF10607	4	CTLH/CRA C-terminal to LisH motif domain
PF01450	4	Acetohydroxy acid isomeroreductase, catalytic domain
PF03725	4	3' exoribonuclease family, domain 2
PF12932	4	Vesicle coat trafficking protein Sec16 mid-region
PF14624	4	VWA / Hh protein intein-like
PF00890	4	FAD binding domain
PF00881	4	Nitroreductase family
PF03134	4	TB2/DP1, HVA22 family
PF02878	4	Phosphoglucomutase/phosphomannomutase, alpha/beta/alpha domain I
PF02826	4	D-isomer specific 2-hydroxyacid dehydrogenase, NAD binding domain
PF02889	4	Sec63 Brl domain
PF16297	4	Domain of unknown function (DUF4939)
PF13012	4	Maintenance of mitochondrial structure and function
PF02984	4	Cyclin, C-terminal domain
PF16470	4	Peptidase S8 pro-domain
PF00957	4	Synaptobrevin
PF01055	4	Glycosyl hydrolases family 31
PF11443	4	Domain of unknown function (DUF2828)
PF10601	4	LITAF-like zinc ribbon domain
PF00255	4	Glutathione peroxidase
PF08777	4	RNA binding motif
PF08190	4	pre-RNA processing PIH1/Nop17
PF13832	4	PHD-zinc-finger like domain
PF08662	4	Eukaryotic translation initiation factor eIF2A
PF13671	4	AAA domain
PF02861	4	Clp amino terminal domain, pathogenicity island component
PF01048	4	Phosphorylase superfamily
PF02732	4	ERCC4 domain
PF00432	4	Prenyltransferase and squalene oxidase repeat
PF10645	4	Carbohydrate binding
PF00156	4	Phosphoribosyl transferase domain
PF00569	4	Zinc finger, ZZ type
PF02874	4	ATP synthase alpha/beta family, beta-barrel domain
PF01026	4	TatD related DNase
PF16213	4	Dimerisation and cyclophilin-binding domain of Mon2
PF05922	4	Peptidase inhibitor I9
PF07991	4	Acetohydroxy acid isomeroreductase, NADPH-binding domain
PF00173	4	Cytochrome b5-like Heme/Steroid binding domain
PF12348	4	CLASP N terminal
PF01417	4	ENTH domain
PF13432	4	Tetratricopeptide repeat
PF01238	4	Phosphomannose isomerase type I
PF01588	4	Putative tRNA binding domain
PF04565	4	RNA polymerase Rpb2, domain 3
PF01105	4	emp24/gp25L/p24 family/GOLD
PF13191	4	AAA ATPase domain
PF02891	4	MIZ/SP-RING zinc finger
PF00036	4	EF hand
PF13513	4	HEAT-like repeat
PF00652	4	Ricin-type beta-trefoil lectin domain
PF01263	4	Aldose 1-epimerase
PF00667	4	FAD binding domain
PF04757	4	Pex2 / Pex12 amino terminal region
PF02145	4	Rap/ran-GAP
PF07714	4	Protein tyrosine kinase
PF00365	4	Phosphofructokinase
PF08711	4	TFIIS helical bundle-like domain
PF11894	4	Nuclear pore complex scaffold, nucleoporins 186/192/205
PF01648	4	4'-phosphopantetheinyl transferase superfamily
PF03914	4	CBF/Mak21 family
PF00288	4	GHMP kinases N terminal domain
PF01758	4	Sodium Bile acid symporter family
PF03104	4	DNA polymerase family B, exonuclease domain
PF00564	4	PB1 domain
PF08550	4	Fungal protein of unknown function (DUF1752)
PF02518	4	Histidine kinase-, DNA gyrase B-, and HSP90-like ATPase
PF00137	4	ATP synthase subunit C
PF04172	4	LrgB-like family
PF00006	4	ATP synthase alpha/beta family, nucleotide-binding domain
PF03097	4	BRO1-like domain
PF00328	4	Histidine phosphatase superfamily (branch 2)
PF00330	4	Aconitase family (aconitate hydratase)
PF02136	4	Nuclear transport factor 2 (NTF2) domain
PF04053	4	Coatomer WD associated region
PF10609	4	NUBPL iron-transfer P-loop NTPase
PF02798	4	Glutathione S-transferase, N-terminal domain
PF00185	4	Aspartate/ornithine carbamoyltransferase, Asp/Orn binding domain
PF02824	4	TGS domain
PF13508	4	Acetyltransferase (GNAT) domain
PF00383	4	Cytidine and deoxycytidylate deaminase zinc-binding region
PF13865	4	C-terminal duplication domain of Friend of PRMT1
PF07992	4	Pyridine nucleotide-disulphide oxidoreductase
PF14938	4	Soluble NSF attachment protein, SNAP
PF02656	4	Domain of unknown function (DUF202)
PF13418	4	Galactose oxidase, central domain
PF00804	4	Syntaxin
PF01207	4	Dihydrouridine synthase (Dus)
PF01909	4	Nucleotidyltransferase domain
PF13802	4	Galactose mutarotase-like
PF05693	4	Glycogen synthase
PF00679	3	Elongation factor G C-terminus
PF01163	3	RIO1 family
PF17010	3	Domain of unknown function (DUF5092)
PF04042	3	DNA polymerase alpha/epsilon subunit B
PF11997	3	Domain of unknown function (DUF3492)
PF08699	3	Argonaute linker 1 domain
PF06224	3	Winged helix DNA-binding domain
PF04438	3	HIT zinc finger
PF02866	3	lactate/malate dehydrogenase, alpha/beta C-terminal domain
PF01053	3	Cys/Met metabolism PLP-dependent enzyme
PF16300	3	Type of WD40 repeat
PF01246	3	Ribosomal protein L24e
PF04003	3	Dip2/Utp12 Family
PF00887	3	Acyl CoA binding protein
PF02493	3	MORN repeat
PF01510	3	N-acetylmuramoyl-L-alanine amidase
PF13347	3	MFS/sugar transport protein
PF16910	3	Repeating coiled region of VPS13
PF11717	3	RNA binding activity-knot of a chromodomain
PF13242	3	HAD-hyrolase-like
PF00923	3	Transaldolase/Fructose-6-phosphate aldolase
PF11976	3	Ubiquitin-2 like Rad60 SUMO-like
PF00378	3	Enoyl-CoA hydratase/isomerase
PF08069	3	Ribosomal S13/S15 N-terminal domain
PF08700	3	Vps51/Vps67
PF00183	3	Hsp90 protein
PF02779	3	Transketolase, pyrimidine binding domain
PF04818	3	RNA polymerase II-binding domain.
PF13840	3	ACT domain
PF00989	3	PAS fold
PF01805	3	Surp module
PF16511	3	N-terminal or F0 domain of Talin-head FERM
PF16486	3	N-terminal domain of argonaute
PF00171	3	Aldehyde dehydrogenase family
PF04072	3	Leucine carboxyl methyltransferase
PF01842	3	ACT domain
PF06966	3	Protein of unknown function (DUF1295)
PF03788	3	LrgA family
PF08314	3	Secretory pathway protein Sec39
PF00654	3	Voltage gated chloride channel
PF01269	3	Fibrillarin
PF04563	3	RNA polymerase beta subunit
PF02800	3	Glyceraldehyde 3-phosphate dehydrogenase, C-terminal domain
PF01693	3	Caulimovirus viroplasmin
PF01853	3	MOZ/SAS family
PF00488	3	MutS domain V
PF09223	3	ZinT (YodA) periplasmic lipocalin-like zinc-recruitment
PF01575	3	MaoC like domain
PF06428	3	GDP/GTP exchange factor Sec2p
PF06294	3	CH-like domain in sperm protein
PF01062	3	Bestrophin, RFP-TM, chloride channel
PF00687	3	Ribosomal protein L1p/L10e family
PF05450	3	Nicastrin
PF04194	3	Programmed cell death protein 2, C-terminal putative domain
PF00631	3	GGL domain
PF04857	3	CAF1 family ribonuclease
PF16193	3	AAA C-terminal domain
PF01483	3	Proprotein convertase P-domain
PF02185	3	Hr1 repeat
PF01532	3	Glycosyl hydrolase family 47
PF10257	3	Retinoic acid induced 16-like protein
PF16124	3	RecQ zinc-binding
PF00180	3	Isocitrate/isopropylmalate dehydrogenase
PF00909	3	Ammonium Transporter Family
PF06017	3	Unconventional myosin tail, actin- and lipid-binding
PF14555	3	UBA-like domain
PF03950	3	tRNA synthetases class I (E and Q), anti-codon binding domain
PF00795	3	Carbon-nitrogen hydrolase
PF12051	3	Protein of unknown function (DUF3533)
PF15985	3	KH domain
PF12717	3	non-SMC mitotic condensation complex subunit 1
PF00638	3	RanBP1 domain
PF16488	3	Argonaute linker 2 domain
PF01080	3	Presenilin
PF00478	3	IMP dehydrogenase / GMP reductase domain
PF08628	3	Sorting nexin C terminal
PF01151	3	GNS1/SUR4 family
PF13238	3	AAA domain
PF02862	3	DDHD domain
PF04641	3	Rtf2 RING-finger
PF01749	3	Importin beta binding domain
PF08953	3	Domain of unknown function (DUF1899)
PF13638	3	PIN domain
PF07973	3	Threonyl and Alanyl tRNA synthetase second additional domain
PF02990	3	Endomembrane protein 70
PF00250	3	Forkhead domain
PF00999	3	Sodium/hydrogen exchanger family
PF01981	3	Peptidyl-tRNA hydrolase PTH2
PF05186	3	Dpy-30 motif
PF10075	3	CSN8/PSMD8/EIF3K family
PF01849	3	NAC domain
PF03399	3	SAC3/GANP family
PF13863	3	Domain of unknown function (DUF4200)
PF02737	3	3-hydroxyacyl-CoA dehydrogenase, NAD binding domain
PF04212	3	MIT (microtubule interacting and transport) domain
PF00762	3	Ferrochelatase
PF01480	3	PWI domain
PF13831	3	PHD-finger
PF13519	3	von Willebrand factor type A domain
PF05786	3	Condensin complex subunit 2
PF01728	3	FtsJ-like methyltransferase
PF13774	3	Regulated-SNARE-like domain
PF00102	3	Protein-tyrosine phosphatase
PF03083	3	Sugar efflux transporter for intercellular exchange
PF00749	3	tRNA synthetases class I (E and Q), catalytic domain
PF09359	3	VTC domain
PF04468	3	PSP1 C-terminal conserved region
PF08542	3	Replication factor C C-terminal domain
PF05879	3	Root hair defective 3 GTP-binding protein (RHD3)
PF16186	3	Atypical Arm repeat
PF01841	3	Transglutaminase-like superfamily
PF00205	3	Thiamine pyrophosphate enzyme, central domain
PF13393	3	Histidyl-tRNA synthetase
PF04051	3	Transport protein particle (TRAPP) component
PF14666	3	Rapamycin-insensitive companion of mTOR, middle domain
PF03388	3	Legume-like lectin family
PF03074	3	Glutamate-cysteine ligase
PF00810	3	ER lumen protein retaining receptor
PF00319	3	SRF-type transcription factor (DNA-binding and dimerisation domain)
PF16363	3	GDP-mannose 4,6 dehydratase
PF03194	3	LUC7 N_terminus
PF16487	3	Mid domain of argonaute
PF01780	3	Ribosomal L37ae protein family
PF02880	3	Phosphoglucomutase/phosphomannomutase, alpha/beta/alpha domain III
PF01479	3	S4 domain
PF16016	3	Domain of unknown function (DUF4782)
PF15979	3	Glycosyl hydrolase family 115
PF02812	3	Glu/Leu/Phe/Val dehydrogenase, dimerisation domain
PF00821	3	Phosphoenolpyruvate carboxykinase C-terminal P-loop domain
PF00294	3	pfkB family carbohydrate kinase
PF00883	3	Cytosol aminopeptidase family, catalytic domain
PF00152	3	tRNA synthetases class II (D, K and N)
PF07228	3	Stage II sporulation protein E (SpoIIE)
PF08616	3	Stabilization of polarity axis
PF16891	3	Serine-threonine protein phosphatase N-terminal domain
PF03105	3	SPX domain
PF01357	3	Pollen allergen
PF00448	3	SRP54-type protein, GTPase domain
PF03178	3	CPSF A subunit region
PF17297	3	Phosphoenolpyruvate carboxykinase N-terminal domain
PF03909	3	BSD domain
PF00098	3	Zinc knuckle
PF13696	3	Zinc knuckle
PF00075	3	RNase H
PF07716	3	Basic region leucine zipper
PF02902	3	Ulp1 protease family, C-terminal catalytic domain
PF12110	3	Nuclear protein 96
PF02194	3	PXA domain
PF02775	3	Thiamine pyrophosphate enzyme, C-terminal TPP binding domain
PF13805	3	Eisosome component PIL1
PF00044	3	Glyceraldehyde 3-phosphate dehydrogenase, NAD binding domain
PF01603	3	Protein phosphatase 2A regulatory B subunit (B56 family)
PF02383	3	SacI homology domain
PF04851	3	Type III restriction enzyme, res subunit
PF02953	3	Tim10/DDP family zinc finger
PF15405	3	Pleckstrin homology domain
PF00474	3	Sodium:solute symporter family
PF00408	3	Phosphoglucomutase/phosphomannomutase, C-terminal domain
PF00206	3	Lyase
PF10296	3	Maintenance of mitochondrial morphology protein 1
PF02450	3	Lecithin:cholesterol acyltransferase
PF07162	3	Ciliary basal body-associated, B9 protein
PF06325	3	Ribosomal protein L11 methyltransferase (PrmA)
PF01370	3	NAD dependent epimerase/dehydratase family
PF00646	3	F-box domain
PF00072	3	Response regulator receiver domain
PF07915	3	Glucosidase II beta subunit-like protein
PF00917	3	MATH domain
PF00725	3	3-hydroxyacyl-CoA dehydrogenase, C-terminal domain
PF01699	3	Sodium/calcium exchanger protein
PF13344	3	Haloacid dehalogenase-like hydrolase
PF05383	3	La domain
PF01644	3	Chitin synthase
PF01119	3	DNA mismatch repair protein, C-terminal domain
PF04142	3	Nucleotide-sugar transporter
PF00568	3	WH1 domain
PF10367	3	Vacuolar sorting protein 39 domain 2
PF02114	3	Phosducin
PF06220	3	U1 zinc finger
PF08264	3	Anticodon-binding domain of tRNA
PF00916	3	Sulfate permease family
PF00867	3	XPG I-region
PF05427	3	Acidic fibroblast growth factor binding (FIBP)
PF04511	3	Der1-like family
PF03901	3	Alg9-like mannosyltransferase family
PF04777	3	Erv1 / Alr family
PF01042	3	Endoribonuclease L-PSP
PF00549	3	CoA-ligase
PF02786	3	Carbamoyl-phosphate synthase L chain, ATP binding domain
PF14381	3	Ethylene-responsive protein kinase Le-CTR1
PF02544	3	3-oxo-5-alpha-steroid 4-dehydrogenase
PF03637	3	Mob1/phocein family
PF12998	3	Inhibitor of growth proteins N-terminal histone-binding
PF00456	3	Transketolase, thiamine diphosphate binding domain
PF02879	3	Phosphoglucomutase/phosphomannomutase, alpha/beta/alpha domain II
PF04768	3	NAT, N-acetyltransferase, of N-acetylglutamate synthase
PF05192	3	MutS domain III
PF00497	3	Bacterial extracellular solute-binding proteins, family 3
PF07202	3	T-complex protein 10 C-terminus
PF07159	3	Protein of unknown function (DUF1394)
PF00636	3	Ribonuclease III domain
PF02922	3	Carbohydrate-binding module 48 (Isoamylase N-terminal domain)
PF13864	3	Calmodulin-binding
PF02171	3	Piwi domain
PF05277	3	Protein of unknown function (DUF726)
PF03029	3	Conserved hypothetical ATP binding protein
PF09729	3	Gti1/Pac2 family
PF02776	3	Thiamine pyrophosphate enzyme, N-terminal TPP binding domain
PF02996	3	Prefoldin subunit
PF15492	3	Neuroblastoma-amplified sequence, N terminal
PF17171	3	Glutathione S-transferase, C-terminal domain
PF17187	3	Svf1-like C-terminal lipocalin-like domain
PF13306	3	Leucine rich repeats (6 copies)
PF00806	3	Pumilio-family RNA binding repeat
PF02847	3	MA3 domain
PF13234	3	rRNA-processing arch domain
PF00717	3	Peptidase S24-like
PF14976	3	FAM72 protein
PF05188	3	MutS domain II
PF14751	3	Domain of unknown function (DUF4474)
PF00266	3	Aminotransferase class-V
PF10433	3	Mono-functional DNA-alkylating methyl methanesulfonate N-term
PF03215	3	Rad17 cell cycle checkpoint protein
PF00682	3	HMGL-like
PF03060	3	Nitronate monooxygenase
PF13847	3	Methyltransferase domain
PF14521	3	Lysine-specific metallo-endopeptidase
PF10373	3	Est1 DNA/RNA binding domain
PF14492	3	Elongation Factor G, domain II
PF02305	3	Capsid protein (F protein)
PF00262	3	Calreticulin family
PF02176	3	TRAF-type zinc finger
PF00536	3	SAM domain (Sterile alpha motif)
PF02421	3	Ferrous iron transport protein B
PF06087	3	Tyrosyl-DNA phosphodiesterase
PF04023	3	FeoA domain
PF00988	3	Carbamoyl-phosphate synthase small chain, CPSase domain
PF17120	3	Zinc-ribbon, C4HC2 type
PF04499	3	SIT4 phosphatase-associated protein
PF04000	3	Sas10/Utp3/C1D family
PF03770	3	Inositol polyphosphate kinase
PF02780	3	Transketolase, C-terminal domain
PF02187	3	Growth-Arrest-Specific Protein 2 Domain
PF08407	3	Chitin synthase N-terminal
PF01872	3	RibD C-terminal domain
PF13641	3	Glycosyltransferase like family 2
PF00790	3	VHS domain
PF01960	3	ArgJ family
PF01624	3	MutS domain I
PF00860	3	Permease family
PF00815	3	Histidinol dehydrogenase
PF02170	3	PAZ domain
PF00485	3	Phosphoribulokinase / Uridine kinase family
PF04871	3	Uso1 / p115 like vesicle tethering protein, C terminal region
PF17123	3	RING-like zinc finger
PF00097	3	Zinc finger, C3HC4 type (RING finger)
PF12330	3	Haspin like kinase domain
PF03124	3	EXS family
PF04176	3	TIP41-like family
PF01239	3	Protein prenyltransferase alpha subunit repeat
PF02466	3	Tim17/Tim22/Tim23/Pmp24 family
PF02225	2	PA domain
PF03983	2	SLA1 homology domain 1, SHD1
PF05362	2	Lon protease (S16) C-terminal proteolytic domain
PF00855	2	PWWP domain
PF15456	2	Up-regulated During Septation
PF08311	2	Mad3/BUB1 homology region 1
PF03167	2	Uracil DNA glycosylase superfamily
PF08154	2	NLE (NUC135) domain
PF03630	2	Fumble
PF05206	2	Methyltransferase TRM13
PF13516	2	Leucine Rich repeat
PF11817	2	Foie gras liver health family 1
PF08079	2	Ribosomal L30 N-terminal domain
PF13415	2	Galactose oxidase, central domain
PF02629	2	CoA binding domain
PF00903	2	Glyoxalase/Bleomycin resistance protein/Dioxygenase superfamily
PF00120	2	Glutamine synthetase, catalytic domain
PF01090	2	Ribosomal protein S19e
PF00817	2	impB/mucB/samB family
PF01846	2	FF domain
PF05175	2	Methyltransferase small domain
PF12436	2	ICP0-binding domain of Ubiquitin-specific protease 7
PF03853	2	YjeF-related protein N-terminus
PF16906	2	Ribosomal proteins L26 eukaryotic, L24P archaeal
PF14587	2	O-Glycosyl hydrolase family 30
PF13019	2	Telomere stability and silencing
PF06738	2	Putative threonine/serine exporter
PF05712	2	MRG
PF01270	2	Glycosyl hydrolases family 8
PF04687	2	Microvirus H protein (pilot protein)
PF00201	2	UDP-glucoronosyl and UDP-glucosyl transferase
PF05023	2	Phytochelatin synthase
PF02338	2	OTU-like cysteine protease
PF03463	2	eRF1 domain 1
PF01176	2	Translation initiation factor 1A / IF-1
PF13304	2	AAA domain, putative AbiEii toxin, Type IV TA system
PF06456	2	Arfaptin-like domain
PF08142	2	AARP2CN (NUC121) domain
PF01544	2	CorA-like Mg2+ transporter protein
PF01388	2	ARID/BRIGHT DNA binding domain
PF13398	2	Peptidase M50B-like
PF10176	2	Protein of unknown function (DUF2370)
PF02925	2	Bacteriophage scaffolding protein D
PF04133	2	Vacuolar protein sorting 55
PF01546	2	Peptidase family M20/M25/M40
PF01591	2	6-phosphofructo-2-kinase
PF04086	2	Signal recognition particle, alpha subunit, N-terminal
PF08546	2	Ketopantoate reductase PanE/ApbA C terminal
PF02991	2	Autophagy protein Atg8 ubiquitin like
PF04097	2	Nup93/Nic96
PF00390	2	Malic enzyme, N-terminal domain
PF10374	2	Telomerase activating protein Est1
PF07529	2	HSA
PF03874	2	RNA polymerase Rpb4
PF16418	2	CCR4-NOT transcription complex subunit 1 HEAT repeat
PF08170	2	POPLD (NUC188) domain
PF03159	2	XRN 5'-3' exonuclease N-terminus
PF09511	2	RNA ligase
PF02127	2	Aminopeptidase I zinc metalloprotease (M18)
PF13476	2	AAA domain
PF08518	2	Spa2 homology domain (SHD) of GIT
PF01667	2	Ribosomal protein S27
PF01137	2	RNA 3'-terminal phosphate cyclase
PF01070	2	FMN-dependent dehydrogenase
PF10312	2	Conserved mid region of cactin
PF03556	2	Cullin binding
PF02269	2	Transcription initiation factor IID, 18kD subunit
PF13181	2	Tetratricopeptide repeat
PF07382	2	Histone H1-like nucleoprotein HC2
PF00244	2	14-3-3 protein
PF08767	2	CRM1 C terminal
PF08771	2	FKBP12-rapamycin binding domain
PF02735	2	Ku70/Ku80 beta-barrel domain
PF08354	2	Domain of unknown function (DUF1729)
PF03847	2	Transcription initiation factor TFIID subunit A
PF01434	2	Peptidase family M41
PF02190	2	ATP-dependent protease La (LON) substrate-binding domain
PF03962	2	Mnd1 family
PF07970	2	Endoplasmic reticulum vesicle transporter
PF07524	2	Bromodomain associated
PF07540	2	Nucleolar complex-associated protein
PF03153	2	Transcription factor IIA, alpha/beta subunit
PF00827	2	Ribosomal L15
PF10403	2	Rad4 beta-hairpin domain 1
PF08324	2	PUL domain
PF05462	2	Slime mold cyclic AMP receptor
PF03720	2	UDP-glucose/GDP-mannose dehydrogenase family, UDP binding domain
PF13912	2	C2H2-type zinc finger
PF08303	2	tRNA ligase kinase domain
PF14438	2	Ataxin 2 SM domain
PF01283	2	Ribosomal protein S26e
PF00814	2	Glycoprotease family
PF01679	2	Proteolipid membrane potential modulator
PF16206	2	C-terminal region of Mon2 protein
PF02525	2	Flavodoxin-like fold
PF04677	2	Protein similar to CwfJ C-terminus 1
PF13419	2	Haloacid dehalogenase-like hydrolase
PF00647	2	Elongation factor 1 gamma, conserved domain
PF02773	2	S-adenosylmethionine synthetase, C-terminal domain
PF10032	2	Phosphate transport (Pho88)
PF00956	2	Nucleosome assembly protein (NAP)
PF17216	2	Rrp44-like cold shock domain
PF02915	2	Rubrerythrin
PF00852	2	Glycosyltransferase family 10 (fucosyltransferase) C-term
PF11865	2	Domain of unknown function (DUF3385)
PF00730	2	HhH-GPD superfamily base excision DNA repair protein
PF09336	2	Vps4 C terminal oligomerisation domain
PF05368	2	NmrA-like family
PF08675	2	RNA binding domain
PF16738	2	Starch-binding module 26
PF04137	2	Endoplasmic Reticulum Oxidoreductin 1 (ERO1)
PF01833	2	IPT/TIG domain
PF14308	2	X-domain of DnaJ-containing
PF01966	2	HD domain
PF02301	2	HORMA domain
PF03398	2	Regulator of Vps4 activity in the MVB pathway
PF06741	2	LsmAD domain
PF03371	2	PRP38 family
PF08603	2	Adenylate cyclase associated (CAP) C terminal
PF04140	2	Isoprenylcysteine carboxyl methyltransferase (ICMT) family
PF00281	2	Ribosomal protein L5
PF00585	2	C-terminal regulatory domain of Threonine dehydratase
PF05804	2	Kinesin-associated protein (KAP)
PF02881	2	SRP54-type protein, helical bundle domain
PF08799	2	pre-mRNA processing factor 4 (PRP4) like
PF09769	2	Apolipoprotein O
PF03911	2	Sec61beta family
PF06068	2	TIP49 C-terminus
PF09773	2	Meckelin (Transmembrane protein 67)
PF12745	2	Anticodon binding domain of tRNAs
PF10186	2	Vacuolar sorting 38 and autophagy-related subunit 14
PF13949	2	ALIX V-shaped domain binding to HIV
PF14299	2	Phloem protein 2
PF03764	2	Elongation factor G, domain IV
PF01195	2	Peptidyl-tRNA hydrolase
PF01326	2	Pyruvate phosphate dikinase, PEP/pyruvate binding domain
PF08295	2	Sin3 family co-repressor
PF00641	2	Zn-finger in Ran binding protein and others
PF01676	2	Metalloenzyme superfamily
PF16879	2	C-terminal domain of Sin3a protein
PF07986	2	Tubulin binding cofactor C
PF06916	2	Protein of unknown function (DUF1279)
PF15963	2	Myb DNA-binding like
PF04567	2	RNA polymerase Rpb2, domain 5
PF05207	2	CSL zinc finger
PF00312	2	Ribosomal protein S15
PF16897	2	C-terminal region of MMR_HSR1 domain
PF04054	2	CCR4-Not complex component, Not1
PF16131	2	Torus domain
PF10351	2	Golgi-body localisation protein domain
PF00218	2	Indole-3-glycerol phosphate synthase
PF13854	2	Kelch motif
PF09324	2	Domain of unknown function (DUF1981)
PF00348	2	Polyprenyl synthetase
PF04046	2	PSP
PF02958	2	Ecdysteroid kinase
PF01740	2	STAS domain
PF13917	2	Zinc knuckle
PF12842	2	Domain of unknown function (DUF3819)
PF05916	2	GINS complex protein
PF02811	2	PHP domain
PF02910	2	Fumarate reductase flavoprotein C-term
PF00538	2	linker histone H1 and H5 family
PF09382	2	RQC domain
PF04178	2	Got1/Sft2-like family
PF03095	2	Phosphotyrosyl phosphate activator (PTPA) protein
PF08759	2	Glycosyltransferase GT-D fold
PF00230	2	Major intrinsic protein
PF08144	2	CPL (NUC119) domain
PF01068	2	ATP dependent DNA ligase domain
PF14533	2	Ubiquitin-specific protease C-terminal
PF06565	2	DUF1126 PH-like domain
PF14382	2	Exosome complex exonuclease RRP4 N-terminal region
PF01000	2	RNA polymerase Rpb3/RpoA insert domain
PF01129	2	NAD:arginine ADP-ribosyltransferase
PF03590	2	Aspartate-ammonia ligase
PF14772	2	Sperm tail
PF13350	2	Tyrosine phosphatase family
PF10347	2	RNA pol II promoter Fmp27 protein domain
PF01713	2	Smr domain
PF09333	2	Autophagy-related protein C terminal domain
PF04157	2	EAP30/Vps36 family
PF05010	2	Transforming acidic coiled-coil-containing protein (TACC)
PF00728	2	Glycosyl hydrolase family 20, catalytic domain
PF12309	2	KIF-1 binding protein C terminal
PF14474	2	RTC4-like domain
PF06544	2	Protein of unknown function (DUF1115)
PF04931	2	DNA polymerase phi
PF16575	2	mRNA cleavage and polyadenylation factor CLP1 P-loop
PF04099	2	Sybindin-like family
PF03721	2	UDP-glucose/GDP-mannose dehydrogenase family, NAD binding domain
PF10744	2	Mediator of RNA polymerase II transcription subunit 1
PF03271	2	EB1-like C-terminal motif
PF04675	2	DNA ligase N terminus
PF08676	2	MutL C terminal dimerisation domain
PF03577	2	Peptidase family C69
PF01201	2	Ribosomal protein S8e
PF14570	2	RING/Ubox like zinc-binding domain
PF00648	2	Calpain family cysteine protease
PF04096	2	Nucleoporin autopeptidase
PF01509	2	TruB family pseudouridylate synthase (N terminal domain)
PF03414	2	Glycosyltransferase family 6
PF02687	2	FtsX-like permease family
PF07807	2	RED-like protein C-terminal region
PF01061	2	ABC-2 type transporter
PF02475	2	Met-10+ like-protein
PF01988	2	VIT family
PF12813	2	XPG domain containing
PF02142	2	MGS-like domain
PF05822	2	Pyrimidine 5'-nucleotidase (UMPH-1)
PF07994	2	Myo-inositol-1-phosphate synthase
PF10602	2	26S proteasome subunit RPN7
PF03941	2	Inner centromere protein, ARK binding region
PF08506	2	Cse1
PF01918	2	Alba
PF04410	2	Gar1/Naf1 RNA binding region
PF02894	2	Oxidoreductase family, C-terminal alpha/beta domain
PF06248	2	Centromere/kinetochore Zw10
PF16211	2	C-terminus of histone H2A
PF05028	2	Poly (ADP-ribose) glycohydrolase (PARG)
PF14825	2	Domain of unknown function (DUF4483)
PF12271	2	Chitin synthase III catalytic subunit
PF02787	2	Carbamoyl-phosphate synthetase large chain, oligomerisation domain
PF09273	2	Rubisco LSMT substrate-binding
PF07651	2	ANTH domain
PF10263	2	SprT-like family
PF12838	2	4Fe-4S dicluster domain
PF01154	2	Hydroxymethylglutaryl-coenzyme A synthase N terminal
PF01576	2	Myosin tail
PF05965	2	F/Y rich C-terminus
PF12265	2	Histone-binding protein RBBP4 or subunit C of CAF1 complex
PF14782	2	Ciliary BBSome complex subunit 2, C-terminal
PF02275	2	Linear amide C-N hydrolases, choloylglycine hydrolase family
PF00459	2	Inositol monophosphatase family
PF14740	2	Domain of unknown function (DUF4471)
PF01237	2	Oxysterol-binding protein
PF07664	2	Ferrous iron transport protein B C terminus
PF03152	2	Ubiquitin fusion degradation protein UFD1
PF01230	2	HIT domain
PF02141	2	DENN (AEX-3) domain
PF08647	2	BRE1 E3 ubiquitin ligase
PF02666	2	Phosphatidylserine decarboxylase
PF01936	2	NYN domain
PF03009	2	Glycerophosphoryl diester phosphodiesterase family
PF08232	2	Striatin family
PF10408	2	Ubiquitin elongating factor core
PF00658	2	Poly-adenylate binding protein, unique domain
PF04950	2	40S ribosome biogenesis protein Tsr1 and BMS1 C-terminal
PF04153	2	NOT2 / NOT3 / NOT5 family
PF13850	2	Endoplasmic Reticulum-Golgi Intermediate Compartment (ERGIC)
PF00579	2	tRNA synthetases class I (W and Y)
PF01266	2	FAD dependent oxidoreductase
PF16415	2	CCR4-NOT transcription complex subunit 1 CAF1-binding domain
PF00043	2	Glutathione S-transferase, C-terminal domain
PF07780	2	Spb1 C-terminal domain
PF01118	2	Semialdehyde dehydrogenase, NAD binding domain
PF01751	2	Toprim domain
PF00467	2	KOW motif
PF02099	2	Josephin
PF03259	2	Roadblock/LC7 domain
PF15477	2	Small acidic protein family
PF00635	2	MSP (Major sperm protein) domain
PF12678	2	RING-H2 zinc finger domain
PF13870	2	Domain of unknown function (DUF4201)
PF04101	2	Glycosyltransferase family 28 C-terminal domain
PF03949	2	Malic enzyme, NAD binding domain
PF12999	2	Glucosidase II beta subunit-like
PF09811	2	Essential protein Yae1, N terminal
PF05255	2	Uncharacterised protein family (UPF0220)
PF08672	2	Anaphase promoting complex (APC) subunit 2
PF03465	2	eRF1 domain 3
PF05997	2	Nucleolar protein,Nop52
PF09295	2	ChAPs (Chs5p-Arf1p-binding proteins)
PF16198	2	tRNA pseudouridylate synthase B C-terminal domain
PF13243	2	Squalene-hopene cyclase C-terminal domain
PF14222	2	Cell morphogenesis N-terminal
PF09325	2	Vps5 C terminal like
PF04502	2	Family of unknown function (DUF572)
PF16863	2	N-terminal barrel of NtMGAM and CtMGAM, maltase-glucoamylase
PF01116	2	Fructose-bisphosphate aldolase class-II
PF03378	2	CAS/CSE protein, C-terminus
PF07842	2	GC-rich sequence DNA-binding factor-like protein
PF04034	2	Ribosome biogenesis protein, C-terminal
PF05964	2	F/Y-rich N-terminus
PF03876	2	SHS2 domain found in N terminus of Rpb7p/Rpc25p/MJ0397
PF09337	2	His(2)-Cys(2) zinc finger
PF08512	2	Histone chaperone Rttp106-like
PF00793	2	DAHP synthetase I family
PF00352	2	Transcription factor TFIID (or TATA-binding protein, TBP)
PF12718	2	Tropomyosin like
PF07039	2	SGF29 tudor-like domain
PF01035	2	6-O-methylguanine DNA methyltransferase, DNA binding domain
PF00570	2	HRDC domain
PF06682	2	SOCE-associated regulatory factor of calcium homoeostasis
PF10211	2	Axonemal dynein light chain
PF00162	2	Phosphoglycerate kinase
PF00391	2	PEP-utilising enzyme, mobile domain
PF08159	2	NUC153 domain
PF14844	2	PH domain associated with Beige/BEACH
PF13249	2	Squalene-hopene cyclase N-terminal domain
PF10513	2	Enhancer of polycomb-like
PF09110	2	HAND
PF01249	2	Ribosomal protein S21e
PF01937	2	Protein of unknown function DUF89
PF01974	2	tRNA intron endonuclease, catalytic C-terminal domain
PF05843	2	Suppressor of forked protein (Suf)
PF14608	2	RNA-binding, Nab2-type zinc finger
PF00327	2	Ribosomal protein L30p/L7e
PF01121	2	Dephospho-CoA kinase
PF01459	2	Eukaryotic porin
PF01612	2	3'-5' exonuclease
PF03517	2	Regulator of volume decrease after cellular swelling
PF05664	2	Plant family of unknown function (DUF810)
PF04147	2	Nop14-like family
PF03006	2	Haemolysin-III related
PF01743	2	Poly A polymerase head domain
PF04712	2	Radial spokehead-like protein
PF00857	2	Isochorismatase family
PF13015	2	Glucosidase II beta subunit-like protein
PF04707	2	PRELI-like family
PF16543	2	DRG Family Regulatory Proteins, Tma46
PF09446	2	VMA21-like domain
PF05327	2	RNA polymerase I specific transcription initiation factor RRN3
PF03055	2	Retinal pigment epithelial membrane protein
PF16073	2	Starter unit:ACP transacylase in aflatoxin biosynthesis
PF07773	2	Protein of unknown function (DUF1619)
PF13913	2	zinc-finger of a C2HC-type
PF00849	2	RNA pseudouridylate synthase
PF07928	2	Vps54-like protein
PF04719	2	hTAFII28-like protein conserved region
PF00313	2	'Cold-shock' DNA-binding domain
PF02586	2	SOS response associated peptidase (SRAP)
PF01229	2	Glycosyl hydrolases family 39
PF01088	2	Ubiquitin carboxyl-terminal hydrolase, family 1
PF10350	2	Putative death-receptor fusion protein (DUF2428)
PF09750	2	Alternative splicing regulator
PF03061	2	Thioesterase superfamily
PF00551	2	Formyl transferase
PF12814	2	Meiotic cell cortex C-terminal pleckstrin homology
PF13650	2	Aspartyl protease
PF15227	2	zinc finger of C3HC4-type, RING
PF02872	2	5'-nucleotidase, C-terminal domain
PF01661	2	Macro domain
PF09732	2	Cactus-binding C-terminus of cactin protein
PF13656	2	RNA polymerase Rpb3/Rpb11 dimerisation domain
PF03248	2	Rer1 family
PF01451	2	Low molecular weight phosphotyrosine protein phosphatase
PF09763	2	Exocyst complex component Sec3
PF04893	2	Yip1 domain
PF03730	2	Ku70/Ku80 C-terminal arm
PF00466	2	Ribosomal protein L10
PF04791	2	LMBR1-like membrane protein
PF13787	2	Protein of unknown function with HXXEE motif
PF03343	2	SART-1 family
PF01873	2	Domain found in IF2B/IF5
PF01775	2	Ribosomal proteins 50S-L18Ae/60S-L20/60S-L18A
PF05008	2	Vesicle transport v-SNARE protein N-terminus
PF07808	2	RED-like protein N-terminal region
PF14664	2	Rapamycin-insensitive companion of mTOR, N-term
PF02200	2	STE like transcription factor
PF08549	2	Fungal domain of unknown function (DUF1750)
PF03661	2	Uncharacterised protein family (UPF0121)
PF13890	2	Rab3 GTPase-activating protein catalytic subunit
PF00235	2	Profilin
PF04059	2	RNA recognition motif 2
PF00977	2	Histidine biosynthesis protein
PF04855	2	SNF5 / SMARCB1 / INI1
PF14681	2	Uracil phosphoribosyltransferase
PF01180	2	Dihydroorotate dehydrogenase
PF10153	2	rRNA-processing protein Efg1
PF07569	2	TUP1-like enhancer of split
PF12872	2	OST-HTH/LOTUS domain
PF12437	2	Glutamine synthetase type III N terminal
PF10405	2	Rad4 beta-hairpin domain 3
PF10332	2	Protein of unknown function (DUF2418)
PF08839	2	DNA replication factor CDT1 like
PF12807	2	Translation initiation factor eIF3 subunit 135
PF02554	2	Carbon starvation protein CstA
PF08356	2	EF hand associated
PF16770	2	Regulator of Ty1 transposition protein 107 BRCT domain
PF07393	2	Exocyst complex component Sec10
PF14429	2	C2 domain in Dock180 and Zizimin proteins
PF01851	2	Proteasome/cyclosome repeat
PF16558	2	Amino-terminal Zinc-binding domain of ubiquitin ligase E3A
PF04679	2	ATP dependent DNA ligase C terminal region
PF14908	2	Domain of unknown function (DUF4496)
PF06968	2	Biotin and Thiamin Synthesis associated domain
PF03177	2	Non-repetitive/WGA-negative nucleoporin C-terminal
PF03464	2	eRF1 domain 2
PF08553	2	VID27 cytoplasmic protein
PF02736	2	Myosin N-terminal SH3-like domain
PF04695	2	Peroxisomal membrane anchor protein (Pex14p) conserved region
PF02077	2	SURF4 family
PF01214	2	Casein kinase II regulatory subunit
PF10568	2	Outer mitochondrial membrane transport complex protein
PF01044	2	Vinculin family
PF07297	2	Dolichol phosphate-mannose biosynthesis regulatory protein (DPM2)
PF03836	2	RasGAP C-terminus
PF05746	2	DALR anticodon binding domain
PF04670	2	Gtr1/RagA G protein conserved region
PF10104	2	Di-sulfide bridge nucleocytoplasmic transport domain
PF02769	2	AIR synthase related protein, C-terminal domain
PF04495	2	GRASP55/65 PDZ-like domain
PF08148	2	DSHCT (NUC185) domain
PF09111	2	SLIDE
PF00924	2	Mechanosensitive ion channel
PF04068	2	Possible Fer4-like domain in RNase L inhibitor, RLI
PF12627	2	Probable RNA and SrmB- binding site of polymerase A
PF08059	2	SEP domain
PF15247	2	Histone RNA hairpin-binding protein RNA-binding domain
PF00719	2	Inorganic pyrophosphatase
PF01817	2	Chorismate mutase type II
PF12719	2	Nuclear condensing complex subunits, C-term domain
PF14815	2	NUDIX domain
PF00438	2	S-adenosylmethionine synthetase, N-terminal domain
PF11718	2	Pre-mRNA 3'-end-processing endonuclease polyadenylation factor C-term
PF04900	2	Fcf1
PF08632	2	Activator of mitotic machinery Cdc14 phosphatase activation C-term
PF01031	2	Dynamin central region
PF00613	2	Phosphoinositide 3-kinase family, accessory domain (PIK domain)
PF13000	2	Acetyl-coenzyme A transporter 1
PF01221	2	Dynein light chain type 1
PF03839	2	Translocation protein Sec62
PF01408	2	Oxidoreductase family, NAD-binding Rossmann fold
PF08636	2	ER protein Pkr1
PF12409	2	P5-type ATPase cation transporter
PF01467	2	Cytidylyltransferase-like
PF00464	2	Serine hydroxymethyltransferase
PF00145	2	C-5 cytosine-specific DNA methylase
PF01193	2	RNA polymerase Rpb3/Rpb11 dimerisation domain
PF00800	2	Prephenate dehydratase
PF01170	2	Putative RNA methylase family UPF0020
PF05890	2	Eukaryotic rRNA processing protein EBP2
PF00752	2	XPG N-terminal domain
PF03553	2	Na+/H+ antiporter family
PF07853	2	Protein of unknown function (DUF1648)
PF09398	2	FOP N terminal dimerisation domain
PF11754	2	Velvet factor
PF01015	2	Ribosomal S3Ae family
PF07817	2	GLE1-like protein
PF00582	2	Universal stress protein family
PF09079	2	CDC6, C terminal winged helix domain
PF08538	2	Protein of unknown function (DUF1749)
PF07491	2	Protein phosphatase inhibitor
PF00203	2	Ribosomal protein S19
PF02150	2	RNA polymerases M/15 Kd subunit
PF08626	2	Transport protein Trs120 or TRAPPC9, TRAPP II complex subunit
PF06831	2	Formamidopyrimidine-DNA glycosylase H2TH domain
PF14668	2	Rapamycin-insensitive companion of mTOR, domain 5
PF05794	2	T-complex protein 11
PF10540	2	Munc13 (mammalian uncoordinated) homology domain
PF07749	2	Endoplasmic reticulum protein ERp29, C-terminal domain
PF05063	2	MT-A70
PF05160	2	DSS1/SEM1 family
PF13921	2	Myb-like DNA-binding domain
PF08540	2	Hydroxymethylglutaryl-coenzyme A synthase C terminal
PF13489	2	Methyltransferase domain
PF01704	2	UTP--glucose-1-phosphate uridylyltransferase
PF14770	2	Transmembrane protein 18
PF16417	2	CCR4-NOT transcription complex subunit 1 TTP binding domain
PF01778	2	Ribosomal L28e protein family
PF03765	2	CRAL/TRIO, N-terminal domain
PF06221	2	Putative zinc finger motif, C2HC5-type
PF08543	2	Phosphomethylpyrimidine kinase
PF02256	2	Iron hydrogenase small subunit
PF13522	2	Glutamine amidotransferase domain
PF01167	2	Tub family
PF02906	2	Iron only hydrogenase large subunit, C-terminal domain
PF03835	2	Rad4 transglutaminase-like domain
PF00450	2	Serine carboxypeptidase
PF11789	2	Zinc-finger of the MIZ type in Nse subunit
PF03381	2	LEM3 (ligand-effect modulator 3) family / CDC50 family
PF12465	2	Proteasome beta subunits C terminal
PF00959	2	Phage lysozyme
PF01323	2	DSBA-like thioredoxin domain
PF03366	2	YEATS family
PF16746	2	BAR domain of APPL family
PF14631	2	Fanconi anaemia protein FancD2 nuclease
PF05670	2	Domain of unknown function (DUF814)
PF13236	2	Clustered mitochondria
PF01171	2	PP-loop family
PF00781	2	Diacylglycerol kinase catalytic domain
PF00984	2	UDP-glucose/GDP-mannose dehydrogenase family, central domain
PF08801	2	Nup133 N terminal like
PF15739	2	Translin-associated factor X-interacting N-terminus
PF07366	2	SnoaL-like polyketide cyclase
PF00375	2	Sodium:dicarboxylate symporter family
PF10475	2	Vacuolar-sorting protein 54, of GARP complex
PF14599	2	Zinc-ribbon
PF04727	2	ELMO/CED-12 family
PF01521	2	Iron-sulphur cluster biosynthesis
PF08240	2	Alcohol dehydrogenase GroES-like domain
PF01063	2	Amino-transferase class IV
PF01866	2	Putative diphthamide synthesis protein
PF14663	2	Rapamycin-insensitive companion of mTOR RasGEF_N domain
PF15665	2	Family with sequence similarity 184, A and B
PF00382	2	Transcription factor TFIIB repeat
PF01156	2	Inosine-uridine preferring nucleoside hydrolase
PF04628	2	Sedlin, N-terminal conserved region
PF02201	2	SWIB/MDM2 domain
PF06886	2	Targeting protein for Xklp2 (TPX2)
PF05529	2	B-cell receptor-associated protein 31-like
PF01435	2	Peptidase family M48
PF15411	2	Pleckstrin homology domain
PF00411	2	Ribosomal protein S11
PF10197	2	N-terminal domain of CBF1 interacting co-repressor CIR
PF01655	2	Ribosomal protein L32
PF16495	2	SWIRM-associated region 1
PF00318	2	Ribosomal protein S2
PF00962	2	Adenosine/AMP deaminase
PF04566	2	RNA polymerase Rpb2, domain 4
PF16076	2	Acyltransferase C-terminus
PF07745	2	Glycosyl hydrolase family 53
PF01294	2	Ribosomal protein L13e
PF02772	2	S-adenosylmethionine synthetase, central domain
PF08355	2	EF hand associated
PF13716	2	Divergent CRAL/TRIO domain
PF03878	2	YIF1
PF17215	2	S1 domain
PF10341	2	Shelterin complex subunit, TPP1/ACD
PF10404	2	Rad4 beta-hairpin domain 2
PF09822	2	ABC-type uncharacterized transport system
PF01253	2	Translation initiation factor SUI1
PF05631	2	Sugar-tranasporters, 12 TM
PF16717	2	Ribosome-associated complex head domain
PF04117	1	Mpv17 / PMP22 family
PF03908	1	Sec20
PF04898	1	Glutamate synthase central domain
PF15158	1	Domain of unknown function (DUF4579)
PF02445	1	Quinolinate synthetase A protein
PF04882	1	Peroxin-3
PF12850	1	Calcineurin-like phosphoesterase superfamily domain
PF09757	1	Arb2 domain
PF05182	1	Fip1 motif
PF00164	1	Ribosomal protein S12/S23
PF10447	1	Exosome component EXOSC1/CSL4
PF01264	1	Chorismate synthase
PF13899	1	Thioredoxin-like
PF01769	1	Divalent cation transporter
PF14636	1	Folliculin-interacting protein N-terminus
PF02219	1	Methylenetetrahydrofolate reductase
PF12220	1	U1 small nuclear ribonucleoprotein of 70kDa MW N terminal
PF08320	1	PIG-X / PBN1
PF02502	1	Ribose/Galactose Isomerase
PF01984	1	Double-stranded DNA-binding domain
PF16508	1	Second BRCT domain on Nijmegen syndrome breakage protein
PF08645	1	Polynucleotide kinase 3 phosphatase
PF01956	1	Integral membrane protein DUF106
PF06244	1	Coiled-coil domain-containing protein 124
PF01200	1	Ribosomal protein S28e
PF04571	1	lipin, N-terminal conserved region
PF00289	1	Biotin carboxylase, N-terminal domain
PF13173	1	AAA domain
PF10334	1	Aromatic acid exporter family member 2
PF09995	1	Uncharacterized protein conserved in bacteria (DUF2236)
PF03501	1	Plectin/S10 domain
PF00750	1	tRNA synthetases class I (R)
PF09404	1	Eukaryotic protein of unknown function (DUF2003)
PF07962	1	Replication Fork Protection Component Swi3
PF13926	1	Domain of unknown function (DUF4211)
PF06012	1	Domain of Unknown Function (DUF908)
PF13881	1	Ubiquitin-2 like Rad60 SUMO-like
PF14698	1	Argininosuccinate lyase C-terminal
PF10596	1	U6-snRNA interacting domain of PrP8
PF16893	1	Fibronectin type III domain
PF01300	1	Telomere recombination
PF09444	1	MRC1-like domain
PF05743	1	UEV domain
PF03850	1	Transcription factor Tfb4
PF05026	1	Dcp2, box A domain
PF07876	1	Stress responsive A/B Barrel Domain
PF10193	1	Telomere length regulation protein
PF06159	1	Protein of unknown function (DUF974)
PF03164	1	Trafficking protein Mon1
PF15787	1	Domain of unknown function (DUF4704)
PF12254	1	DNA polymerase alpha subunit p180 N terminal
PF04004	1	Leo1-like protein
PF06046	1	Exocyst complex component Sec6
PF07923	1	N1221-like protein
PF03987	1	Autophagocytosis associated protein, active-site domain
PF08424	1	NRDE-2, necessary for RNA interference
PF16876	1	Lipin/Ned1/Smp2 multi-domain protein middle domain
PF14833	1	NAD-binding of NADP-dependent 3-hydroxyisobutyrate dehydrogenase
PF09753	1	Membrane fusion protein Use1
PF00919	1	Uncharacterized protein family UPF0004
PF01259	1	SAICAR synthetase
PF12205	1	G protein-coupled receptor kinase-interacting protein 1 C term
PF09463	1	Opy2 protein
PF01212	1	Beta-eliminating lyase
PF07779	1	10 TM Acyl Transferase domain found in Cas1p
PF14324	1	PINIT domain
PF13380	1	CoA binding domain
PF07650	1	KH domain
PF01990	1	ATP synthase (F/14-kDa) subunit
PF13429	1	Tetratricopeptide repeat
PF16294	1	RNSP1-SAP18 binding (RSB) motif
PF05602	1	Cleft lip and palate transmembrane protein 1 (CLPTM1)
PF02978	1	Signal peptide binding domain
PF03690	1	Uncharacterised protein family (UPF0160)
PF13768	1	von Willebrand factor type A domain
PF08507	1	COPI associated protein
PF10415	1	Fumarase C C-terminus
PF05378	1	Hydantoinase/oxoprolinase N-terminal region
PF09261	1	Alpha mannosidase middle domain
PF15370	1	Domain of unknown function (DUF4598)
PF11708	1	Pre-mRNA splicing Prp18-interacting factor
PF08618	1	Transcription factor Opi1
PF00275	1	EPSP synthase (3-phosphoshikimate 1-carboxyvinyltransferase)
PF06726	1	Bladder cancer-related protein BC10
PF01738	1	Dienelactone hydrolase family
PF02747	1	Proliferating cell nuclear antigen, C-terminal domain
PF16457	1	Pleckstrin homology domain
PF01471	1	Putative peptidoglycan binding domain
PF11875	1	Domain of unknown function (DUF3395)
PF06883	1	RNA polymerase I, Rpa2 specific domain
PF04802	1	Component of IIS longevity pathway SMK-1
PF08624	1	Chromatin remodelling complex Rsc7/Swp82 subunit
PF04377	1	Arginine-tRNA-protein transferase, C terminus
PF10256	1	Golgin subfamily A member 7/ERF4 family
PF13520	1	Amino acid permease
PF00930	1	Dipeptidyl peptidase IV (DPP IV) N-terminal region
PF07508	1	Recombinase
PF03224	1	V-ATPase subunit H
PF07019	1	Rab5-interacting protein (Rab5ip)
PF10394	1	Histone acetyl transferase HAT1 N-terminus
PF16898	1	C-terminal associated domain of TOPRIM
PF07713	1	Protein of unknown function (DUF1604)
PF01199	1	Ribosomal protein L34e
PF00238	1	Ribosomal protein L14p/L23e
PF08208	1	DNA-directed RNA polymerase I subunit RPA34.5
PF10235	1	Microtubule-associated protein CRIPT
PF11312	1	Putative SAM-dependent methyltransferase
PF02163	1	Peptidase family M50
PF06769	1	YoeB-like toxin of bacterial type II toxin-antitoxin system
PF04190	1	Protein of unknown function (DUF410)
PF10243	1	Microtubule-binding protein MIP-T3
PF08510	1	PIG-P
PF05837	1	Centromere protein H (CENP-H)
PF10261	1	Inositol phospholipid synthesis and fat-storage-inducing TM
PF08164	1	Apoptosis-antagonizing transcription factor, C-terminal
PF05257	1	CHAP domain
PF17286	1	PRMT5 oligomerisation domain
PF04048	1	Sec8 exocyst complex component specific domain
PF14225	1	Cell morphogenesis C-terminal
PF09830	1	ATP adenylyltransferase
PF16491	1	CAAX prenyl protease N-terminal, five membrane helices
PF07064	1	RIC1
PF12765	1	HEAT repeat associated with sister chromatid cohesion
PF08531	1	Alpha-L-rhamnosidase N-terminal domain
PF02749	1	Quinolinate phosphoribosyl transferase, N-terminal domain
PF03939	1	Ribosomal protein L23, N-terminal domain
PF01491	1	Frataxin-like domain
PF03483	1	B3/4 domain
PF02837	1	Glycosyl hydrolases family 2, sugar binding domain
PF15625	1	CC2D2A N-terminal C2 domain
PF08581	1	Tup N-terminal
PF03749	1	Sugar fermentation stimulation protein
PF04930	1	FUN14 family
PF11841	1	Domain of unknown function (DUF3361)
PF06991	1	Microfibril-associated/Pre-mRNA processing
PF02791	1	DDT domain
PF01925	1	Sulfite exporter TauE/SafE
PF14634	1	zinc-RING finger domain
PF09414	1	RNA ligase
PF05652	1	Scavenger mRNA decapping enzyme (DcpS) N-terminal
PF08598	1	Sds3-like
PF08726	1	Ca2+ insensitive EF hand
PF12682	1	Flavodoxin
PF02179	1	BAG domain
PF01280	1	Ribosomal protein L19e
PF16916	1	Dimerisation domain of Zinc Transporter
PF10469	1	AKAP7 2'5' RNA ligase-like domain
PF13812	1	Pentatricopeptide repeat domain
PF12317	1	Intraflagellar transport complex B protein 46 C terminal
PF04062	1	ARP2/3 complex ARPC3 (21 kDa) subunit
PF08149	1	BING4CT (NUC141) domain
PF02836	1	Glycosyl hydrolases family 2, TIM barrel domain
PF04424	1	MINDY deubiquitinase
PF12619	1	Mini-chromosome maintenance protein 2
PF15907	1	Integrin-alpha FG-GAP repeat-containing protein 2
PF07539	1	Down-regulated in metastasis
PF04121	1	Nuclear pore protein 84 / 107
PF14878	1	Death-like domain of SPT6
PF02186	1	TFIIE beta subunit core domain
PF01784	1	NIF3 (NGG1p interacting factor 3)
PF09734	1	RNA polymerase III transcription factor (TF)IIIC subunit
PF14370	1	C-terminal topoisomerase domain
PF10230	1	Lipid-droplet associated hydrolase
PF09725	1	Folate-sensitive fragile site protein Fra10Ac1
PF03540	1	Transcription initiation factor TFIID 23-30kDa subunit
PF00572	1	Ribosomal protein L13
PF03576	1	Peptidase family S58
PF08584	1	Ribonuclease P 40kDa (Rpp40) subunit
PF00282	1	Pyridoxal-dependent decarboxylase conserved domain
PF08571	1	Yos1-like
PF01025	1	GrpE
PF10419	1	TFIIIC subunit
PF02777	1	Iron/manganese superoxide dismutases, C-terminal domain
PF13679	1	Methyltransferase domain
PF10018	1	Vitamin-D-receptor interacting Mediator subunit 4
PF09440	1	eIF3 subunit 6 N terminal domain
PF16188	1	C-terminal region of peptidase_M24
PF17172	1	Glutathione S-transferase N-terminal domain
PF01896	1	DNA primase small subunit
PF00697	1	N-(5'phosphoribosyl)anthranilate (PRA) isomerase
PF01608	1	I/LWEQ domain
PF04889	1	Cwf15/Cwc15 cell cycle control protein
PF10237	1	Probable N6-adenine methyltransferase
PF04739	1	5'-AMP-activated protein kinase beta subunit, interaction domain
PF13902	1	R3H-associated N-terminal domain
PF04065	1	Not1 N-terminal domain, CCR4-Not complex component
PF04762	1	IKI3 family
PF13877	1	Potential Monad-binding region of RPAP3
PF11942	1	Spt5 transcription elongation factor, acidic N-terminal
PF08610	1	Peroxisomal membrane protein (Pex16)
PF04263	1	Thiamin pyrophosphokinase, catalytic domain
PF07575	1	Nup85 Nucleoporin
PF09766	1	Fms-interacting protein
PF07818	1	HCNGP-like protein
PF07975	1	TFIIH C1-like domain
PF05719	1	Golgi phosphoprotein 3 (GPP34)
PF08502	1	LeuA allosteric (dimerisation) domain
PF10537	1	ATP-utilising chromatin assembly and remodelling N-terminal
PF14560	1	Ubiquitin-like domain
PF04158	1	Sof1-like domain
PF15064	1	Cation channel sperm-associated protein subunit gamma
PF08327	1	Activator of Hsp90 ATPase homolog 1-like protein
PF02970	1	Tubulin binding cofactor A
PF12239	1	Protein of unknown function (DUF3605)
PF00590	1	Tetrapyrrole (Corrin/Porphyrin) Methylases
PF10508	1	Proteasome non-ATPase 26S subunit
PF05197	1	TRIC channel
PF02153	1	Prephenate dehydrogenase
PF01507	1	Phosphoadenosine phosphosulfate reductase family
PF15916	1	Domain of unknown function (DUF4743)
PF03980	1	Nnf1
PF14781	1	Ciliary BBSome complex subunit 2, N-terminal
PF11712	1	Endoplasmic reticulum-based factor for assembly of V-ATPase
PF05236	1	Transcription initiation factor TFIID component TAF4 family
PF01226	1	Formate/nitrite transporter
PF06415	1	BPG-independent PGAM N-terminus (iPGM_N)
PF03952	1	Enolase, N-terminal domain
PF08285	1	Dolichol-phosphate mannosyltransferase subunit 3 (DPM3)
PF14931	1	Intraflagellar transport complex B, subunit 20
PF00484	1	Carbonic anhydrase
PF09531	1	Nucleoporin protein Ndc1-Nup
PF10168	1	Nuclear pore component
PF01912	1	eIF-6 family
PF17405	1	Nrap protein nucleotidyltransferase domain 4
PF01409	1	tRNA synthetases class II core domain (F)
PF11221	1	Subunit 21 of Mediator complex
PF03081	1	Exo70 exocyst complex subunit
PF02933	1	Cell division protein 48 (CDC48), domain 2
PF13401	1	AAA domain
PF12519	1	Mitochondrial distribution and morphology protein 10
PF04078	1	Cell differentiation family, Rcd1-like
PF06098	1	Radial spoke protein 3
PF05250	1	Uncharacterised protein family (UPF0193)
PF12253	1	Chromatin assembly factor 1 subunit A
PF01187	1	Macrophage migration inhibitory factor (MIF)
PF10409	1	C2 domain of PTEN tumour-suppressor protein
PF13725	1	Possible tRNA binding domain
PF12537	1	The Golgi pH Regulator (GPHR) Family N-terminal
PF02843	1	Phosphoribosylglycinamide synthetase, C domain
PF16884	1	N-terminal domain of oxidoreductase
PF10238	1	E2F-associated phosphoprotein
PF02291	1	Transcription initiation factor IID, 31kD subunit
PF10383	1	Transcription-silencing protein Clr2
PF14791	1	DNA polymerase beta thumb
PF06398	1	Integral peroxisomal membrane peroxin
PF02229	1	Transcriptional Coactivator p15 (PC4)
PF16187	1	Middle or third domain of peptidase_M16
PF00491	1	Arginase family
PF05064	1	Nsp1-like C-terminal region
PF00204	1	DNA gyrase B
PF13373	1	DUF2407 C-terminal domain
PF08903	1	Domain of unknown function (DUF1846)
PF01885	1	RNA 2'-phosphotransferase, Tpt1 / KptA family
PF00026	1	Eukaryotic aspartyl protease
PF07919	1	Gryzun, putative trafficking through Golgi
PF04729	1	ASF1 like histone chaperone
PF10856	1	Protein of unknown function (DUF2678)
PF04928	1	Poly(A) polymerase central domain
PF07890	1	Rrp15p
PF02759	1	RUN domain
PF01687	1	Riboflavin kinase
PF01368	1	DHH family
PF10443	1	RNA12 protein
PF08221	1	RNA polymerase III subunit RPC82 helix-turn-helix domain
PF09749	1	Uncharacterised conserved protein
PF01987	1	Mitochondrial biogenesis AIM24
PF00670	1	S-adenosyl-L-homocysteine hydrolase, NAD binding domain
PF01204	1	Trehalase
PF14656	1	Rab3 GTPase-activating protein regulatory subunit C-terminus
PF06202	1	Amylo-alpha-1,6-glucosidase
PF09801	1	Integral membrane protein S linking to the trans Golgi network
PF17390	1	Bacterial alpha-L-rhamnosidase C-terminal domain
PF08597	1	Translation initiation factor eIF3 subunit
PF15926	1	E3 ubiquitin-protein ligase RNF220
PF17292	1	POB3-like N-terminal PH domain
PF12455	1	Dynein associated protein
PF13862	1	p21-C-terminal region-binding protein
PF05856	1	ARP2/3 complex 20 kDa subunit (ARPC4)
PF13177	1	DNA polymerase III, delta subunit
PF04981	1	NMD3 family
PF04181	1	Rtr1/RPAP2 family
PF10275	1	Peptidase C65 Otubain
PF07933	1	Protein of unknown function (DUF1681)
PF08231	1	SYF2 splicing factor
PF08146	1	BP28CT (NUC211) domain
PF04113	1	Gpi16 subunit, GPI transamidase component
PF16183	1	Kinesin-associated
PF01028	1	Eukaryotic DNA topoisomerase I, catalytic core
PF16573	1	N-terminal beta-sandwich domain of polyadenylation factor
PF09341	1	Transcription factor Pcc1
PF01086	1	Clathrin light chain
PF12624	1	N-terminal region of Chorein or VPS13
PF16353	1	Domain of unknown function(DUF4981)
PF03999	1	Microtubule associated protein (MAP65/ASE1 family)
PF05700	1	Breast carcinoma amplified sequence 2 (BCAS2)
PF05536	1	Neurochondrin
PF07081	1	Protein of unknown function (DUF1349)
PF03719	1	Ribosomal protein S5, C-terminal domain
PF12430	1	Abscisic acid G-protein coupled receptor
PF01536	1	Adenosylmethionine decarboxylase
PF16761	1	Transcription-silencing protein, cryptic loci regulator Clr2
PF00834	1	Ribulose-phosphate 3 epimerase family
PF00708	1	Acylphosphatase
PF01634	1	ATP phosphoribosyltransferase
PF04506	1	Rft protein
PF12695	1	Alpha/beta hydrolase family
PF06732	1	Pescadillo N-terminus
PF11916	1	Vacuolar protein 14 C-terminal Fig4p binding
PF03825	1	Nucleoside H+ symporter
PF08438	1	GTPase of unknown function C-terminal
PF10357	1	Domain of Kin17 curved DNA-binding protein
PF15102	1	TMEM154 protein family
PF10391	1	Fingers domain of DNA polymerase lambda
PF01111	1	Cyclin-dependent kinase regulatory subunit
PF05833	1	Fibronectin-binding protein A N-terminus (FbpA)
PF05496	1	Holliday junction DNA helicase ruvB N-terminus
PF00088	1	Trefoil (P-type) domain
PF02995	1	Protein of unknown function (DUF229)
PF03367	1	ZPR1 zinc-finger domain
PF07571	1	TAF6 C-terminal HEAT repeat domain
PF10163	1	Transcription factor e(y)2
PF05285	1	SDA1
PF11732	1	Transcription- and export-related complex subunit
PF03942	1	DTW domain
PF00366	1	Ribosomal protein S17
PF14630	1	Origin recognition complex (ORC) subunit 5 C-terminus
PF13851	1	Growth-arrest specific micro-tubule binding
PF10360	1	Protein of unknown function (DUF2433)
PF12833	1	Helix-turn-helix domain
PF09817	1	RZZ complex, subunit zwilch
PF13245	1	AAA domain
PF16483	1	Beta-1,3-glucanase
PF05620	1	Protein of unknown function (DUF788)
PF14996	1	Retinal Maintenance
PF01168	1	Alanine racemase, N-terminal domain
PF08623	1	TATA-binding protein interacting (TIP20)
PF05903	1	PPPDE putative peptidase domain
PF04258	1	Signal peptide peptidase
PF01210	1	NAD-dependent glycerol-3-phosphate dehydrogenase N-terminus
PF02792	1	Mago nashi protein
PF02833	1	DHHA2 domain
PF07093	1	SGT1 protein
PF01557	1	Fumarylacetoacetate (FAA) hydrolase family
PF06470	1	SMC proteins Flexible Hinge Domain
PF05625	1	PAXNEB protein
PF16203	1	ERCC3/RAD25/XPB C-terminal helicase
PF07034	1	Origin recognition complex (ORC) subunit 3 N-terminus
PF05603	1	Protein of unknown function (DUF775)
PF01875	1	Memo-like protein
PF08514	1	STAG domain
PF02213	1	GYF domain
PF16892	1	Chitin biosynthesis protein CHS5 N-terminus
PF04061	1	ORMDL family
PF11704	1	Vesicle coat protein involved in Golgi to plasma membrane transport
PF11923	1	Domain of unknown function (DUF3441)
PF08534	1	Redoxin
PF16199	1	Radical_SAM C-terminal domain
PF03666	1	Nitrogen Permease regulator of amino acid transport activity 3
PF10369	1	Small subunit of acetolactate synthase
PF01777	1	Ribosomal L27e protein family
PF14779	1	Ciliary BBSome complex subunit 1
PF08923	1	Mitogen-activated protein kinase kinase 1 interacting
PF04100	1	Vps53-like, N-terminal
PF10598	1	RNA recognition motif of the spliceosomal PrP8
PF01103	1	Surface antigen
PF07719	1	Tetratricopeptide repeat
PF02929	1	Beta galactosidase small chain
PF13898	1	Domain of unknown function (DUF4205)
PF04008	1	Adenosine specific kinase
PF17146	1	PIN domain of ribonuclease
PF02887	1	Pyruvate kinase, alpha/beta domain
PF03456	1	uDENN domain
PF02064	1	MAS20 protein import receptor
PF04921	1	XAP5, circadian clock regulator
PF01191	1	RNA polymerase Rpb5, C-terminal domain
PF08996	1	DNA Polymerase alpha zinc finger
PF12589	1	Methyltransferase involved in Williams-Beuren syndrome
PF08625	1	Utp13 specific WD40 associated domain
PF04420	1	CHD5-like protein
PF05179	1	RNA pol II accessory factor, Cdc73 family, C-terminal
PF16122	1	40S ribosomal protein SA C-terminus
PF15020	1	Cation channel sperm-associated protein subunit delta
PF04849	1	HAP1 N-terminal conserved region
PF01474	1	Class-II DAHP synthetase family
PF06912	1	Protein of unknown function (DUF1275)
PF03291	1	mRNA capping enzyme
PF00210	1	Ferritin-like domain
PF14775	1	Sperm tail C-terminal domain
PF08652	1	RAI1 like PD-(D/E)XK nuclease
PF06839	1	GRF zinc finger
PF04756	1	OST3 / OST6 family, transporter family
PF13279	1	Thioesterase-like superfamily
PF04129	1	Vps52 / Sac2 family
PF05669	1	SOH1
PF13878	1	zinc-finger of acetyl-transferase ESCO
PF08737	1	Rgp1
PF00237	1	Ribosomal protein L22p/L17e
PF01394	1	Clathrin propeller repeat
PF11728	1	Putative aromatic acid exporter C-terminal domain
PF16797	1	Fungal kinase associated-1 domain
PF10493	1	Rough deal protein C-terminal region
PF15902	1	Sortilin, neurotensin receptor 3,
PF12449	1	Protein of unknown function (DUF3684)
PF00764	1	Arginosuccinate synthase
PF13445	1	RING-type zinc-finger
PF15729	1	Amyotrophic lateral sclerosis 2 candidate 11
PF10531	1	SLBB domain
PF04934	1	MED6 mediator sub complex component
PF04057	1	Replication factor-A protein 1, N-terminal domain
PF06858	1	Nucleolar GTP-binding protein 1 (NOG1)
PF12584	1	Trafficking protein particle complex subunit 10, TRAPPC10
PF13229	1	Right handed beta helix region
PF12054	1	Domain of unknown function (DUF3535)
PF04366	1	Las17-binding protein actin regulator
PF13402	1	Peptidase M60, enhancin and enhancin-like
PF04910	1	Transcriptional repressor TCF25
PF10199	1	Alpha and gamma adaptin binding protein p34
PF13925	1	con80 domain of Katanin
PF01424	1	R3H domain
PF01633	1	Choline/ethanolamine kinase
PF12074	1	Domain of unknown function (DUF3554)
PF04281	1	Mitochondrial import receptor subunit Tom22
PF16413	1	DNA mismatch repair protein Mlh1 C-terminus
PF08704	1	tRNA methyltransferase complex GCD14 subunit
PF04188	1	Mannosyltransferase (PIG-V)
PF01680	1	SOR/SNZ family
PF14661	1	HAUS augmin-like complex subunit 6 N-terminus
PF09439	1	Signal recognition particle receptor beta subunit
PF15870	1	ElonginA binding-protein 1
PF00584	1	SecE/Sec61-gamma subunits of protein translocation complex
PF06391	1	CDK-activating kinase assembly factor MAT1
PF09754	1	PAC2 family
PF06479	1	Ribonuclease 2-5A
PF12928	1	tRNA-splicing endonuclease subunit sen54 N-term
PF13023	1	HD domain
PF01991	1	ATP synthase (E/31 kDa) subunit
PF06573	1	Churchill protein
PF02045	1	CCAAT-binding transcription factor (CBF-B/NF-YA) subunit B
PF03587	1	EMG1/NEP1 methyltransferase
PF03807	1	NADP oxidoreductase coenzyme F420-dependent
PF12031	1	SWI/SNF-like complex subunit BAF250/Osa
PF16278	1	C2HE / C2H2 / C2HC zinc-binding finger
PF00565	1	Staphylococcal nuclease homologue
PF08569	1	Mo25-like
PF04146	1	YT521-B-like domain
PF01406	1	tRNA synthetases class I (C) catalytic domain
PF13740	1	ACT domain
PF11527	1	The ARF-like 2 binding protein BART
PF13439	1	Glycosyltransferase Family 4
PF06881	1	RNA polymerase II transcription factor SIII (Elongin) subunit A
PF14304	1	Transcription termination and cleavage factor C-terminal
PF07470	1	Glycosyl Hydrolase Family 88
PF00994	1	Probable molybdopterin binding domain
PF03126	1	Plus-3 domain
PF01855	1	Pyruvate flavodoxin/ferredoxin oxidoreductase, thiamine diP-bdg
PF01411	1	tRNA synthetases class II (A)
PF16909	1	Vacuolar-sorting-associated 13 protein C-terminal
PF14619	1	Snf2-ATP coupling, chromatin remodelling complex
PF04750	1	FAR-17a/AIG1-like protein
PF04056	1	Ssl1-like
PF04488	1	Glycosyltransferase sugar-binding region containing DXD motif
PF07792	1	Docking domain of Afi1 for Arf3 in vesicle trafficking
PF10255	1	RNA polymerase I-associated factor PAF67
PF10397	1	Adenylosuccinate lyase C-terminus
PF05486	1	Signal recognition particle 9 kDa protein (SRP9)
PF00239	1	Resolvase, N terminal domain
PF07488	1	Glycosyl hydrolase family 67 middle domain
PF06047	1	Ras-induced vulval development antagonist
PF16979	1	SAPK-interacting protein 1 (Sin1), Pleckstrin-homology
PF08239	1	Bacterial SH3 domain
PF05645	1	RNA polymerase III subunit RPC82
PF13510	1	2Fe-2S iron-sulfur cluster binding domain
PF08587	1	Ubiquitin associated domain (UBA)
PF09825	1	Biotin-protein ligase, N terminal
PF04733	1	Coatomer epsilon subunit
PF02877	1	Poly(ADP-ribose) polymerase, regulatory domain
PF08501	1	Shikimate dehydrogenase substrate binding domain
PF07814	1	Wings apart-like protein regulation of heterochromatin
PF16835	1	Pre-mRNA-splicing factor SF3a complex subunit 2 (Prp11)
PF14728	1	PTHB1 C-terminus
PF14635	1	Helix-hairpin-helix motif
PF01929	1	Ribosomal protein L14
PF10406	1	Transcription factor TFIID complex subunit 8 C-term
PF16699	1	Cleavage stimulation factor subunit 1, dimerisation domain
PF04124	1	Dor1-like family
PF00425	1	chorismate binding enzyme
PF08202	1	Mis12-Mtw1 protein family
PF16503	1	Zinc-ribbon
PF03179	1	Vacuolar (H+)-ATPase G subunit
PF05181	1	XPA protein C-terminus
PF05158	1	RNA polymerase Rpc34 subunit
PF14777	1	Cilia BBSome complex subunit 10
PF02594	1	Uncharacterised ACR, YggU family COG1872
PF08646	1	Replication factor-A C terminal domain
PF08153	1	NGP1NT (NUC091) domain
PF13515	1	Fusaric acid resistance protein-like
PF08155	1	NOGCT (NUC087) domain
PF05832	1	Eukaryotic protein of unknown function (DUF846)
PF11816	1	Domain of unknown function (DUF3337)
PF12862	1	Anaphase-promoting complex subunit 5
PF13907	1	Domain of unknown function (DUF4208)
PF06645	1	Microsomal signal peptidase 12 kDa subunit (SPC12)
PF09807	1	Elongation complex protein 6
PF17121	1	Zinc finger, C3HC4 type (RING finger)
PF03348	1	Serine incorporator (Serinc)
PF14868	1	Domain of unknown function (DUF4487)
PF11698	1	V-ATPase subunit H
PF00838	1	Translationally controlled tumour protein
PF09668	1	Aspartyl protease
PF10058	1	Predicted integral membrane zinc-ribbon metal-binding protein
PF03099	1	Biotin/lipoate A/B protein ligase family
PF01287	1	Eukaryotic elongation factor 5A hypusine, DNA-binding OB fold
PF06093	1	Spt4/RpoE2 zinc finger
PF08906	1	Domain of unknown function (DUF1851)
PF10159	1	Kinase phosphorylation protein
PF02840	1	Prp18 domain
PF02548	1	Ketopantoate hydroxymethyltransferase
PF01465	1	GRIP domain
PF04574	1	Protein of unknown function (DUF592)
PF00380	1	Ribosomal protein S9/S16
PF08920	1	Splicing factor 3B subunit 1
PF09741	1	Uncharacterized conserved protein (DUF2045)
PF16201	1	Nucleolar pre-ribosomal-associated protein 1
PF04615	1	Utp14 protein
PF12353	1	Eukaryotic translation initiation factor 3 subunit G
PF16752	1	Tubulin-specific chaperone C N-terminal domain
PF15801	1	zf-MYND-like zinc finger, mRNA-binding
PF05983	1	MED7 protein
PF06058	1	Dcp1-like decapping family
PF11715	1	Nucleoporin Nup120/160
PF14769	1	Flagellar C1a complex subunit C1a-32
PF10375	1	GRIP-related Arf-binding domain
PF02919	1	Eukaryotic DNA topoisomerase I, DNA binding fragment
PF01247	1	Ribosomal protein L35Ae
PF12157	1	Protein of unknown function (DUF3591)
PF13880	1	ESCO1/2 acetyl-transferase
PF08698	1	Fcf2 pre-rRNA processing
PF04127	1	DNA / pantothenate metabolism flavoprotein
PF07743	1	HSCB C-terminal oligomerisation domain
PF04557	1	Glutaminyl-tRNA synthetase, non-specific RNA binding region part 2
PF16900	1	Replication protein A OB domain
PF16088	1	BLOC-1-related complex sub-unit 7
PF12108	1	Splicing factor SF3a60 binding domain
PF02109	1	DAD family
PF14360	1	PAP2 superfamily C-terminal
PF01852	1	START domain
PF14933	1	CEP19-like protein
PF04493	1	Endonuclease V
PF03849	1	Transcription factor Tfb2
PF02205	1	WH2 motif
PF05346	1	Eukaryotic membrane protein family
PF09765	1	WD-repeat region
PF08752	1	Coatomer gamma subunit appendage platform subdomain
PF14716	1	Helix-hairpin-helix domain
PF02268	1	Transcription initiation factor IIA, gamma subunit, helical domain
PF00939	1	Sodium:sulfate symporter transmembrane region
PF01488	1	Shikimate / quinate 5-dehydrogenase
PF12612	1	Tubulin folding cofactor D C terminal
PF13874	1	Nucleoporin complex subunit 54
PF10381	1	Autophagocytosis associated protein C-terminal
PF10189	1	Integrator complex subunit 3
PF07289	1	Bardet-Biedl syndrome 5 protein
PF06110	1	Eukaryotic protein of unknown function (DUF953)
PF02089	1	Palmitoyl protein thioesterase
PF08490	1	Domain of unknown function (DUF1744)
PF11793	1	FANCL C-terminal domain
PF08590	1	Domain of unknown function (DUF1771)
PF06029	1	AlkA N-terminal domain
PF11722	1	CCCH zinc finger in TRM13 protein
PF10343	1	Potential Queuosine, Q, salvage protein family
PF08068	1	DKCLD (NUC011) domain
PF09358	1	Ubiquitin fold domain
PF02574	1	Homocysteine S-methyltransferase
PF03660	1	PHF5-like protein
PF03297	1	S25 ribosomal protein
PF10496	1	SNARE-complex protein Syntaxin-18 N-terminus
PF08071	1	RS4NT (NUC023) domain
PF02272	1	DHHA1 domain
PF04112	1	Mak10 subunit, NatC N(alpha)-terminal acetyltransferase
PF06424	1	PRP1 splicing factor, N-terminal
PF15249	1	Conserved region of unknown function on GLTSCR protein
PF12874	1	Zinc-finger of C2H2 type
PF01142	1	tRNA pseudouridine synthase D (TruD)
PF07200	1	Modifier of rudimentary (Mod(r)) protein
PF12243	1	CTD kinase subunit gamma CTK3
PF04423	1	Rad50 zinc hook motif
PF03715	1	Noc2p family
PF01256	1	Carbohydrate kinase
PF15924	1	ALG11 mannosyltransferase N-terminus
PF05291	1	Bystin
PF09637	1	Med18 protein
PF00416	1	Ribosomal protein S13/S18
PF00278	1	Pyridoxal-dependent decarboxylase, C-terminal sheet domain
PF14838	1	Integrator complex subunit 5 C-terminus
PF09814	1	HECT-like Ubiquitin-conjugating enzyme (E2)-binding
PF08784	1	Replication protein A C terminal
PF05251	1	Oligosaccharyltransferase subunit 5
PF13299	1	Cleavage and polyadenylation factor 2 C-terminal
PF13529	1	Peptidase_C39 like family
PF16045	1	LisH
PF10260	1	Uncharacterized conserved domain (SAYSvFN)
PF06658	1	Protein of unknown function (DUF1168)
PF00285	1	Citrate synthase, C-terminal domain
PF01233	1	Myristoyl-CoA:protein N-myristoyltransferase, N-terminal domain
PF02537	1	CrcB-like protein, Camphor Resistance (CrcB)
PF10366	1	Vacuolar sorting protein 39 domain 1
PF11464	1	Rabenosyn Rab binding domain
PF04376	1	Arginine-tRNA-protein transferase, N terminus
PF10376	1	Double-strand recombination repair protein
PF13423	1	Ubiquitin carboxyl-terminal hydrolase
PF11957	1	THO complex subunit 1 transcription elongation factor
PF08630	1	Dfp1/Him1, central region
PF08172	1	CASP C terminal
PF00024	1	PAN domain
PF14633	1	SH2 domain
PF00111	1	2Fe-2S iron-sulfur cluster binding domain
PF04938	1	Survival motor neuron (SMN) interacting protein 1 (SIP1)
PF06699	1	GPI biosynthesis protein family Pig-F
PF17135	1	Ribosomal protein 60S L18 and 50S L18e
PF04037	1	Domain of unknown function (DUF382)
PF09454	1	Vps23 core domain
PF09649	1	Histone chaperone domain CHZ
PF03484	1	tRNA synthetase B5 domain
PF09430	1	Protein of unknown function (DUF2012)
PF06814	1	Lung seven transmembrane receptor
PF12460	1	RNAPII transcription regulator C-terminal
PF05871	1	ESCRT-II complex subunit
PF10180	1	Uncharacterised conserved protein (DUF2373)
PF09797	1	N-acetyltransferase B complex (NatB) non catalytic subunit
PF15375	1	Domain of unknown function (DUF4602)
PF02782	1	FGGY family of carbohydrate kinases, C-terminal domain
PF09262	1	Peroxisome biogenesis factor 1, N-terminal
PF02403	1	Seryl-tRNA synthetase N-terminal domain
PF02913	1	FAD linked oxidases, C-terminal domain
PF02940	1	mRNA capping enzyme, beta chain
PF02659	1	Putative manganese efflux pump
PF07492	1	Neutral trehalase Ca2+ binding domain
PF06728	1	GPI transamidase subunit PIG-U
PF01564	1	Spermine/spermidine synthase domain
PF13886	1	Domain of unknown function (DUF4203)
PF01502	1	Phosphoribosyl-AMP cyclohydrolase
PF08642	1	Histone deacetylation protein Rxt3
PF10392	1	Golgi transport complex subunit 5
PF07189	1	Splicing factor 3B subunit 10 (SF3b10)
PF01868	1	Domain of unknown function UPF0086
PF14249	1	Tocopherol cyclase
PF05406	1	WGR domain
PF03451	1	HELP motif
PF01894	1	Uncharacterised protein family UPF0047
PF03881	1	Fructosamine kinase
PF17034	1	Zinc-ribbon like family
PF01487	1	Type I 3-dehydroquinase
PF01149	1	Formamidopyrimidine-DNA glycosylase N-terminal domain
PF01746	1	tRNA (Guanine-1)-methyltransferase
[truncated: 1,021 more rows]

## Sheet: Pfam_info
Pfam accession	clan accession	clan ID	Pfam_Id	Pfam description
PF00001	CL0192	GPCR_A	7tm_1	7 transmembrane receptor (rhodopsin family)
PF00002	CL0192	GPCR_A	7tm_2	7 transmembrane receptor (Secretin family)
PF00003	CL0192	GPCR_A	7tm_3	7 transmembrane sweet-taste receptor of 3 GCPR
PF00004	CL0023	P-loop_NTPase	AAA	ATPase family associated with various cellular activities (AAA)
PF00005	CL0023	P-loop_NTPase	ABC_tran	ABC transporter
PF00006	CL0023	P-loop_NTPase	ATP-synt_ab	ATP synthase alpha/beta family, nucleotide-binding domain
PF00007	CL0079	Cystine-knot	Cys_knot	Cystine-knot domain
PF00008	CL0001	EGF	EGF	EGF-like domain
PF00009	CL0023	P-loop_NTPase	GTP_EFTU	Elongation factor Tu GTP binding domain
PF00010			HLH	Helix-loop-helix DNA-binding domain
PF00011	CL0190	HSP20	HSP20	Hsp20/alpha crystallin family
PF00012	CL0108	Actin_ATPase	HSP70	Hsp70 protein
PF00013	CL0007	KH	KH_1	KH domain
PF00014			Kunitz_BPTI	Kunitz/Bovine pancreatic trypsin inhibitor domain
PF00015			MCPsignal	Methyl-accepting chemotaxis protein (MCP) signalling domain
PF00016			RuBisCO_large	Ribulose bisphosphate carboxylase large chain, catalytic domain
PF00017	CL0541	SH2-like	SH2	SH2 domain
PF00018	CL0010	SH3	SH3_1	SH3 domain
PF00019	CL0079	Cystine-knot	TGF_beta	Transforming growth factor beta like domain
PF00020	CL0607	TNF_receptor	TNFR_c6	TNFR/NGFR cysteine-rich region
PF00021	CL0117	uPAR_Ly6_toxin	UPAR_LY6	u-PAR/Ly-6 domain
PF00022	CL0108	Actin_ATPase	Actin	Actin
PF00023	CL0465	Ank	Ank	Ankyrin repeat
PF00024	CL0168	PAN	PAN_1	PAN domain
PF00025	CL0023	P-loop_NTPase	Arf	ADP-ribosylation factor family
PF00026	CL0129	Peptidase_AA	Asp	Eukaryotic aspartyl protease
PF00027	CL0029	Cupin	cNMP_binding	Cyclic nucleotide-binding domain
PF00028	CL0159	E-set	Cadherin	Cadherin domain
PF00029	CL0375	Transporter	Connexin	Connexin
PF00030	CL0333	gCrystallin	Crystall	Beta/Gamma crystallin
PF00031	CL0121	Cystatin	Cystatin	Cystatin domain
PF00032			Cytochrom_B_C	Cytochrome b(C-terminal)/b6/petD
PF00033	CL0328	2heme_cytochrom	Cytochrome_B	Cytochrome b/b6/petB
PF00034	CL0318	Cytochrome-c	Cytochrom_C	Cytochrome c
PF00035	CL0196	DSRM	dsrm	Double-stranded RNA binding motif
PF00036	CL0220	EF_hand	EF-hand_1	EF hand
PF00037	CL0344	4Fe-4S	Fer4	4Fe-4S binding domain
PF00038			Filament	Intermediate filament protein
PF00039	CL0451	FnI-like	fn1	Fibronectin type I domain
PF00040	CL0602	Kringle	fn2	Fibronectin type II domain
PF00041	CL0159	E-set	fn3	Fibronectin type III domain
PF00042	CL0090	Globin	Globin	Globin
PF00043	CL0497	GST_C	GST_C	Glutathione S-transferase, C-terminal domain
PF00044	CL0063	NADP_Rossmann	Gp_dh_N	Glyceraldehyde 3-phosphate dehydrogenase, NAD binding domain
PF00045			Hemopexin	Hemopexin
PF00046	CL0123	HTH	Homeobox	Homeobox domain
PF00047	CL0011	Ig	ig	Immunoglobulin domain
PF00048			IL8	Small cytokines (intecrine/chemokine), interleukin-8 like
PF00049	CL0239	Insulin	Insulin	Insulin/IGF/Relaxin family
PF00050	CL0005	Kazal	Kazal_1	Kazal-type serine protease inhibitor domain
PF00051	CL0602	Kringle	Kringle	Kringle domain
PF00052	CL0202	GBD	Laminin_B	Laminin B (Domain IV)
PF00053	CL0001	EGF	Laminin_EGF	Laminin EGF domain
PF00054	CL0004	Concanavalin	Laminin_G_1	Laminin G domain
PF00055	CL0202	GBD	Laminin_N	Laminin N-terminal (Domain VI)
PF00056	CL0063	NADP_Rossmann	Ldh_1_N	lactate/malate dehydrogenase, NAD binding domain
PF00057			Ldl_recept_a	Low-density lipoprotein receptor domain class A
PF00058	CL0186	Beta_propeller	Ldl_recept_b	Low-density lipoprotein receptor repeat class B
PF00059	CL0056	C_Lectin	Lectin_C	Lectin C-type domain
PF00060	CL0030	Ion_channel	Lig_chan	Ligand-gated ion channel
PF00061	CL0116	Calycin	Lipocalin	Lipocalin / cytosolic fatty-acid binding protein family
PF00062	CL0037	Lysozyme	Lys	C-type lysozyme/alpha-lactalbumin family
PF00063	CL0023	P-loop_NTPase	Myosin_head	Myosin head (motor domain)
PF00064	CL0434	Sialidase	Neur	Neuraminidase
PF00066			Notch	LNR domain
PF00067			p450	Cytochrome P450
PF00068	CL0629	PLA2	Phospholip_A2_1	Phospholipase A2
PF00069	CL0016	PKinase	Pkinase	Protein kinase domain
PF00070	CL0063	NADP_Rossmann	Pyr_redox	Pyridine nucleotide-disulphide oxidoreductase
PF00071	CL0023	P-loop_NTPase	Ras	Ras family
PF00072	CL0304	CheY	Response_reg	Response regulator receiver domain
PF00073	CL0055	Viral_ssRNA_CP	Rhv	picornavirus capsid protein
PF00074			RnaseA	Pancreatic ribonuclease
PF00075	CL0219	RNase_H	RNase_H	RNase H
PF00076	CL0221	RRM	RRM_1	RNA recognition motif. (a.k.a. RRM, RBD, or RNP domain)
PF00077	CL0129	Peptidase_AA	RVP	Retroviral aspartyl protease
PF00078	CL0027	RdRP	RVT_1	Reverse transcriptase (RNA-dependent DNA polymerase)
PF00079			Serpin	Serpin (serine protease inhibitor)
PF00080			Sod_Cu	Copper/zinc superoxide dismutase (SODC)
PF00081			Sod_Fe_N	Iron/manganese superoxide dismutases, alpha-hairpin domain
PF00082			Peptidase_S8	Subtilase family
PF00083	CL0015	MFS	Sugar_tr	Sugar (and other) transporter
PF00084	CL0001	EGF	Sushi	Sushi repeat (SCR repeat)
PF00085	CL0172	Thioredoxin	Thioredoxin	Thioredoxin
PF00086			Thyroglobulin_1	Thyroglobulin type-1 repeat
PF00087	CL0117	uPAR_Ly6_toxin	Toxin_TOLIP	Snake toxin and toxin-like protein
PF00088	CL0630	PSI	Trefoil	Trefoil (P-type) domain
PF00089	CL0124	Peptidase_PA	Trypsin	Trypsin
PF00090			TSP_1	Thrombospondin type 1 domain
PF00091	CL0566	Tubulin	Tubulin	Tubulin/FtsZ family, GTPase domain
PF00092	CL0128	vWA-like	VWA	von Willebrand factor type A domain
PF00093	CL0451	FnI-like	VWC	von Willebrand factor type C domain
PF00094			VWD	von Willebrand factor type D domain
PF00095			WAP	WAP-type (Whey Acidic Protein) 'four-disulfide core'
PF00096	CL0361	C2H2-zf	zf-C2H2	Zinc finger, C2H2 type
PF00097	CL0229	RING	zf-C3HC4	Zinc finger, C3HC4 type (RING finger)
PF00098	CL0511	Retroviral_zf	zf-CCHC	Zinc knuckle
PF00100			Zona_pellucida	Zona pellucida-like domain
PF00101			RuBisCO_small	Ribulose bisphosphate carboxylase, small chain
PF00102	CL0031	Phosphatase	Y_phosphatase	Protein-tyrosine phosphatase
PF00103	CL0053	4H_Cytokine	Hormone_1	Somatotropin hormone family
PF00104			Hormone_recep	Ligand-binding domain of nuclear hormone receptor
PF00105	CL0167	Zn_Beta_Ribbon	zf-C4	Zinc finger, C4 type (two domains)
PF00106	CL0063	NADP_Rossmann	adh_short	short chain dehydrogenase
PF00107	CL0063	NADP_Rossmann	ADH_zinc_N	Zinc-binding dehydrogenase
PF00108	CL0046	Thiolase	Thiolase_N	Thiolase, N-terminal domain
PF00109	CL0046	Thiolase	ketoacyl-synt	Beta-ketoacyl synthase, N-terminal domain
PF00110			wnt	wnt family
PF00111	CL0486	Fer2	Fer2	2Fe-2S iron-sulfur cluster binding domain
PF00112	CL0125	Peptidase_CA	Peptidase_C1	Papain family cysteine protease
PF00113	CL0256	Enolase_TIM	Enolase_C	Enolase, C-terminal TIM barrel domain
PF00114	CL0327	Pilus	Pilin	Pilin (bacterial filament)
PF00115			COX1	Cytochrome C and Quinol oxidase polypeptide I
PF00116	CL0026	CU_oxidase	COX2	Cytochrome C oxidase subunit II, periplasmic domain
PF00117	CL0014	Glutaminase_I	GATase	Glutamine amidotransferase class-I
PF00118			Cpn60_TCP1	TCP-1/cpn60 chaperonin family
PF00119			ATP-synt_A	ATP synthase A chain
PF00120	CL0286	GCS	Gln-synt_C	Glutamine synthetase, catalytic domain
PF00121	CL0036	TIM_barrel	TIM	Triosephosphate isomerase
PF00122			E1-E2_ATPase	E1-E2 ATPase
PF00123			Hormone_2	Peptide hormone
PF00124			Photo_RC	Photosynthetic reaction centre protein
PF00125	CL0012	Histone	Histone	Core histone H2A/H2B/H3/H4
PF00126	CL0123	HTH	HTH_1	Bacterial regulatory helix-turn-helix protein, lysR family
PF00127	CL0026	CU_oxidase	Copper-bind	Copper binding proteins, plastocyanin/azurin family
PF00128	CL0058	Glyco_hydro_tim	Alpha-amylase	Alpha amylase, catalytic domain
PF00129	CL0343	MHC	MHC_I	Class I Histocompatibility antigen, domains alpha 1 and 2
PF00130	CL0006	C1	C1_1	Phorbol esters/diacylglycerol binding domain (C1 domain)
PF00131	CL0461	Metallothionein	Metallothio	Metallothionein
PF00132	CL0536	HEXAPEP	Hexapep	Bacterial transferase hexapeptide (six repeats)
PF00133	CL0039	HUP	tRNA-synt_1	tRNA synthetases class I (I, L, M and V)
PF00134	CL0065	Cyclin	Cyclin_N	Cyclin, N-terminal domain
PF00135	CL0028	AB_hydrolase	COesterase	Carboxylesterase family
PF00136	CL0194	DNA_pol_B-like	DNA_pol_B	DNA polymerase family B
PF00137			ATP-synt_C	ATP synthase subunit C
PF00139	CL0004	Concanavalin	Lectin_legB	Legume lectin domain
PF00140			Sigma70_r1_2	Sigma-70 factor, region 1.2
PF00141	CL0617	Peroxidase	peroxidase	Peroxidase
PF00142	CL0023	P-loop_NTPase	Fer4_NifH	4Fe-4S iron sulfur cluster binding proteins, NifH/frxC family
PF00143	CL0053	4H_Cytokine	Interferon	Interferon alpha/beta domain
PF00144	CL0013	Beta-lactamase	Beta-lactamase	Beta-lactamase
PF00145	CL0063	NADP_Rossmann	DNA_methylase	C-5 cytosine-specific DNA methylase
PF00146			NADHdh	NADH dehydrogenase
PF00147	CL0422	Fibrinogen_C	Fibrinogen_C	Fibrinogen beta and gamma chains, C-terminal globular domain
PF00148	CL0043	Chelatase	Oxidored_nitro	Nitrogenase component 1 type Oxidoreductase
PF00149	CL0163	Calcineurin	Metallophos	Calcineurin-like phosphoesterase
PF00150	CL0058	Glyco_hydro_tim	Cellulase	Cellulase (glycosyl hydrolase family 5)
PF00151	CL0028	AB_hydrolase	Lipase	Lipase
PF00152	CL0040	tRNA_synt_II	tRNA-synt_2	tRNA synthetases class II (D, K and N)
PF00153			Mito_carr	Mitochondrial carrier protein
PF00154	CL0023	P-loop_NTPase	RecA	recA bacterial DNA recombination protein
PF00155	CL0061	PLP_aminotran	Aminotran_1_2	Aminotransferase class I and II
PF00156	CL0533	PRTase-like	Pribosyltran	Phosphoribosyl transferase domain
PF00157	CL0123	HTH	Pou	Pou domain - N-terminal to homeobox domain
PF00158	CL0023	P-loop_NTPase	Sigma54_activat	Sigma-54 interaction domain
PF00159			Hormone_3	Pancreatic hormone peptide
PF00160	CL0475	Cyclophil-like	Pro_isomerase	Cyclophilin type peptidyl-prolyl cis-trans isomerase/CLD
PF00161			RIP	Ribosome inactivating protein
PF00162			PGK	Phosphoglycerate kinase
PF00163	CL0492	S4	Ribosomal_S4	Ribosomal protein S4/S9 N-terminal domain
PF00164	CL0021	OB	Ribosom_S12_S23	Ribosomal protein S12/S23
PF00165	CL0123	HTH	HTH_AraC	Bacterial regulatory helix-turn-helix proteins, AraC family
PF00166	CL0296	GroES	Cpn10	Chaperonin 10 Kd subunit
PF00167	CL0066	Trefoil	FGF	Fibroblast growth factor
PF00168	CL0154	C2	C2	C2 domain
PF00169	CL0266	PH	PH	PH domain
PF00170	CL0018	bZIP	bZIP_1	bZIP transcription factor
PF00171	CL0099	ALDH-like	Aldedh	Aldehyde dehydrogenase family
PF00172			Zn_clus	Fungal Zn(2)-Cys(6) binuclear cluster domain
PF00173			Cyt-b5	Cytochrome b5-like Heme/Steroid binding domain
PF00174	CL0072	Ubiquitin	Oxidored_molyb	Oxidoreductase molybdopterin binding domain
PF00175	CL0091	NAD_Ferredoxin	NAD_binding_1	Oxidoreductase NAD-binding domain
PF00176	CL0023	P-loop_NTPase	SNF2_N	SNF2 family N-terminal domain
PF00177			Ribosomal_S7	Ribosomal protein S7p/S5e
PF00178	CL0123	HTH	Ets	Ets-domain
PF00179	CL0208	UBC	UQ_con	Ubiquitin-conjugating enzyme
PF00180	CL0270	Iso_DH	Iso_dh	Isocitrate/isopropylmalate dehydrogenase
PF00181	CL0021	OB	Ribosomal_L2	Ribosomal Proteins L2, RNA binding domain
PF00182	CL0037	Lysozyme	Glyco_hydro_19	Chitinase class I
PF00183			HSP90	Hsp90 protein
PF00184			Hormone_5	Neurohypophysial hormones, C-terminal Domain
PF00185	CL0399	Asp-glut_race	OTCace	Aspartate/ornithine carbamoyltransferase, Asp/Orn binding domain
PF00186	CL0387	DHFred	DHFR_1	Dihydrofolate reductase
PF00187			Chitin_bind_1	Chitin recognition protein
PF00188	CL0659	CAP	CAP	Cysteine-rich secretory protein family
PF00189			Ribosomal_S3_C	Ribosomal protein S3, C-terminal domain
PF00190	CL0029	Cupin	Cupin_1	Cupin
PF00191			Annexin	Annexin
PF00193	CL0056	C_Lectin	Xlink	Extracellular link domain
PF00194			Carb_anhydrase	Eukaryotic-type carbonic anhydrase
PF00195	CL0046	Thiolase	Chal_sti_synt_N	Chalcone and stilbene synthases, N-terminal domain
PF00196	CL0123	HTH	GerE	Bacterial regulatory proteins, luxR family
PF00197	CL0066	Trefoil	Kunitz_legume	Trypsin and protease inhibitor
PF00198	CL0149	CoA-acyltrans	2-oxoacid_dh	2-oxoacid dehydrogenases acyltransferase (catalytic domain)
PF00199			Catalase	Catalase
PF00200			Disintegrin	Disintegrin
PF00201	CL0113	GT-B	UDPGT	UDP-glucoronosyl and UDP-glucosyl transferase
PF00202	CL0061	PLP_aminotran	Aminotran_3	Aminotransferase class-III
PF00203			Ribosomal_S19	Ribosomal protein S19
PF00204	CL0329	S5	DNA_gyraseB	DNA gyrase B
PF00205	CL0085	FAD_DHS	TPP_enzyme_M	Thiamine pyrophosphate enzyme, central domain
PF00206			Lyase_1	Lyase
PF00207	CL0159	E-set	A2M	Alpha-2-macroglobulin family
PF00208	CL0063	NADP_Rossmann	ELFV_dehydrog	Glutamate/Leucine/Phenylalanine/Valine dehydrogenase
PF00209	CL0062	APC	SNF	Sodium:neurotransmitter symporter family
PF00210	CL0044	Ferritin	Ferritin	Ferritin-like domain
PF00211	CL0276	Nucleot_cyclase	Guanylate_cyc	Adenylate and Guanylate cyclase catalytic domain
PF00212			ANP	Atrial natriuretic peptide
PF00213	CL0255	ATP_synthase	OSCP	ATP synthase delta (OSCP) subunit
PF00214			Calc_CGRP_IAPP	Calcitonin / CGRP / IAPP family
PF00215	CL0036	TIM_barrel	OMPdecase	Orotidine 5'-phosphate decarboxylase / HUMPS family
PF00216	CL0548	IHF-likeDNA-bdg	Bac_DNA_binding	Bacterial DNA-binding protein
PF00217	CL0286	GCS	ATP-gua_Ptrans	ATP:guanido phosphotransferase, C-terminal catalytic domain
PF00218	CL0036	TIM_barrel	IGPS	Indole-3-glycerol phosphate synthase
PF00219	CL0547	GF_recep_C-rich	IGFBP	Insulin-like growth factor binding protein
PF00220			Hormone_4	Neurohypophysial hormones, N-terminal Domain
PF00221			Lyase_aromatic	Aromatic amino acid lyase
PF00223			PsaA_PsaB	Photosystem I psaA/psaB protein
PF00224	CL0151	PK_TIM	PK	Pyruvate kinase, barrel domain
PF00225	CL0023	P-loop_NTPase	Kinesin	Kinesin motor domain
PF00226	CL0392	Chaperone-J	DnaJ	DnaJ domain
PF00227	CL0052	NTN	Proteasome	Proteasome subunit
PF00228			Bowman-Birk_leg	Bowman-Birk serine protease inhibitor family
PF00229	CL0100	C1q_TNF	TNF	TNF(Tumour Necrosis Factor) family
PF00230			MIP	Major intrinsic protein
PF00231			ATP-synt	ATP synthase
PF00232	CL0058	Glyco_hydro_tim	Glyco_hydro_1	Glycosyl hydrolase family 1
PF00233	CL0237	HD_PDEase	PDEase_I	3'5'-cyclic nucleotide phosphodiesterase
PF00234	CL0482	Prolamin	Tryp_alpha_amyl	Protease inhibitor/seed storage/LTP family
PF00235	CL0431	PF	Profilin	Profilin
PF00236	CL0079	Cystine-knot	Hormone_6	Glycoprotein hormone
PF00237			Ribosomal_L22	Ribosomal protein L22p/L17e
PF00238			Ribosomal_L14	Ribosomal protein L14p/L23e
PF00239			Resolvase	Resolvase, N terminal domain
PF00240	CL0072	Ubiquitin	ubiquitin	Ubiquitin family
PF00241	CL0092	ADF	Cofilin_ADF	Cofilin/tropomyosin-type actin-binding protein
PF00242			DNA_pol_viral_N	DNA polymerase (viral) N-terminal domain
PF00243	CL0079	Cystine-knot	NGF	Nerve growth factor family
PF00244			2003-03-14	14-3-3 protein
PF00245	CL0088	Alk_phosphatase	Alk_phosphatase	Alkaline phosphatase
PF00246	CL0035	Peptidase_MH	Peptidase_M14	Zinc carboxypeptidase
PF00248			Aldo_ket_red	Aldo/keto reductase family
PF00249	CL0123	HTH	Myb_DNA-binding	Myb-like DNA-binding domain
PF00250	CL0123	HTH	Forkhead	Forkhead domain
PF00251	CL0143	B_Fructosidase	Glyco_hydro_32N	Glycosyl hydrolases family 32 N-terminal domain
PF00252			Ribosomal_L16	Ribosomal protein L16p/L10e
PF00253			Ribosomal_S14	Ribosomal protein S14p/S29e
PF00254	CL0487	FKBP	FKBP_C	FKBP-type peptidyl-prolyl cis-trans isomerase
PF00255	CL0172	Thioredoxin	GSHPx	Glutathione peroxidase
PF00257			Dehydrin	Dehydrin
PF00258	CL0042	Flavoprotein	Flavodoxin_1	Flavodoxin
PF00260			Protamine_P1	Protamine P1
PF00261	CL0452	Tropomyosin-lke	Tropomyosin	Tropomyosin
PF00262	CL0004	Concanavalin	Calreticulin	Calreticulin family
PF00263			Secretin	Bacterial type II and III secretion system protein
PF00264	CL0205	Di-copper	Tyrosinase	Common central domain of tyrosinase
PF00265	CL0023	P-loop_NTPase	TK	Thymidine kinase
PF00266	CL0061	PLP_aminotran	Aminotran_5	Aminotransferase class-V
PF00267	CL0193	MBB	Porin_1	Gram-negative porin
PF00268	CL0044	Ferritin	Ribonuc_red_sm	Ribonucleotide reductase, small chain
PF00269			SASP	Small, acid-soluble spore proteins, alpha/beta type
PF00270	CL0023	P-loop_NTPase	DEAD	DEAD/DEAH box helicase
PF00271	CL0023	P-loop_NTPase	Helicase_C	Helicase conserved C-terminal domain
PF00272			Cecropin	Cecropin family
PF00273	CL0282	Serum_albumin	Serum_albumin	Serum albumin family
PF00274	CL0035	Peptidase_MH	Glycolytic	Fructose-bisphosphate aldolase class-I
PF00275	CL0290	EPT_RTPC	EPSP_synthase	EPSP synthase (3-phosphoshikimate 1-carboxyvinyltransferase)
PF00276			Ribosomal_L23	Ribosomal protein L23
PF00277			SAA	Serum amyloid A protein
PF00278			Orn_DAP_Arg_deC	Pyridoxal-dependent decarboxylase, C-terminal sheet domain
PF00280	CL0367	CI-2	potato_inhibit	Potato inhibitor I family
PF00281	CL0652	S24e_L23_L15e	Ribosomal_L5	Ribosomal protein L5
PF00282	CL0061	PLP_aminotran	Pyridoxal_deC	Pyridoxal-dependent decarboxylase conserved domain
PF00283			Cytochrom_B559	Cytochrome b559, alpha (gene psbE) and beta (gene psbF)subunits
PF00284			Cytochrom_B559a	Lumenal portion of Cytochrome b559, alpha (gene psbE) subunit
PF00285			Citrate_synt	Citrate synthase, C-terminal domain
PF00286			Flexi_CP	Viral coat protein
PF00287			Na_K-ATPase	Sodium / potassium ATPase beta chain
PF00288	CL0329	S5	GHMP_kinases_N	GHMP kinases N terminal domain
PF00289	CL0483	PreATP-grasp	Biotin_carb_N	Biotin carboxylase, N-terminal domain
PF00290	CL0036	TIM_barrel	Trp_syntA	Tryptophan synthase alpha chain
PF00291			PALP	Pyridoxal-phosphate dependent enzyme
PF00292	CL0123	HTH	PAX	'Paired box' domain
PF00293	CL0261	NUDIX	NUDIX	NUDIX domain
PF00294	CL0118	Ribokinase	PfkB	pfkB family carbohydrate kinase
PF00295	CL0268	Pec_lyase-like	Glyco_hydro_28	Glycosyl hydrolases family 28
PF00296			Bac_luciferase	Luciferase-like monooxygenase
PF00297	CL0575	EFTPs	Ribosomal_L3	Ribosomal protein L3
PF00298			Ribosomal_L11	Ribosomal protein L11, RNA binding domain
PF00299	CL0096	Pept_Inhib_IE	Squash	Squash family serine protease inhibitor
PF00300	CL0071	His_phosphatase	His_Phos_1	Histidine phosphatase superfamily (branch 1)
PF00301	CL0045	Rubredoxin	Rubredoxin	Rubredoxin
PF00302	CL0149	CoA-acyltrans	CAT	Chloramphenicol acetyltransferase
PF00303			Thymidylat_synt	Thymidylate synthase
PF00304	CL0054	Knottin_1	Gamma-thionin	Gamma-thionin family
PF00305			Lipoxygenase	Lipoxygenase
PF00306			ATP-synt_ab_C	ATP synthase alpha/beta chain, C terminal domain
PF00307	CL0188	CH	CH	Calponin homology (CH) domain
PF00308	CL0023	P-loop_NTPase	Bac_DnaA	Bacterial dnaA protein
PF00309			Sigma54_AID	Sigma-54 factor, Activator interacting domain (AID)
PF00310	CL0052	NTN	GATase_2	Glutamine amidotransferases class-II
PF00311	CL0151	PK_TIM	PEPcase	Phosphoenolpyruvate carboxylase
PF00312	CL0600	S15_NS1	Ribosomal_S15	Ribosomal protein S15
PF00313	CL0021	OB	CSD	'Cold-shock' DNA-binding domain
PF00314	CL0293	CDC	Thaumatin	Thaumatin family
PF00316	CL0171	Phospoesterase	FBPase	Fructose-1-6-bisphosphatase, N-terminal domain
PF00317			Ribonuc_red_lgN	Ribonucleotide reductase, all-alpha domain
PF00318	CL0067	SIS	Ribosomal_S2	Ribosomal protein S2
PF00319			SRF-TF	SRF-type transcription factor (DNA-binding and dimerisation domain)
PF00320	CL0167	Zn_Beta_Ribbon	GATA	GATA zinc finger
PF00321			Thionin	Plant thionin
PF00322			Endothelin	Endothelin family
PF00323	CL0075	Defensin	Defensin_1	Mammalian defensin
PF00324	CL0062	APC	AA_permease	Amino acid permease
PF00325	CL0123	HTH	Crp	Bacterial regulatory proteins, crp family
PF00326	CL0028	AB_hydrolase	Peptidase_S9	Prolyl oligopeptidase family
PF00327			Ribosomal_L30	Ribosomal protein L30p/L7e
PF00328	CL0071	His_phosphatase	His_Phos_2	Histidine phosphatase superfamily (branch 2)
PF00329			Complex1_30kDa	Respiratory-chain NADH dehydrogenase, 30 Kd subunit
PF00330			Aconitase	Aconitase family (aconitate hydratase)
PF00331	CL0058	Glyco_hydro_tim	Glyco_hydro_10	Glycosyl hydrolase family 10
PF00332	CL0058	Glyco_hydro_tim	Glyco_hydro_17	Glycosyl hydrolases family 17
PF00333	CL0196	DSRM	Ribosomal_S5	Ribosomal protein S5, N-terminal domain
PF00334			NDK	Nucleoside diphosphate kinase
PF00335	CL0347	Tetraspannin	Tetraspannin	Tetraspanin family
PF00336			DNA_pol_viral_C	DNA polymerase (viral) C-terminal domain
PF00337	CL0004	Concanavalin	Gal-bind_lectin	Galactoside-binding lectin
PF00338			Ribosomal_S10	Ribosomal protein S10p/S20e
PF00339	CL0135	Arrestin_N-like	Arrestin_N	Arrestin (or S-antigen), N-terminal domain
PF00340	CL0066	Trefoil	IL1	Interleukin-1 / 18
PF00341	CL0079	Cystine-knot	PDGF	PDGF/VEGF domain
PF00342	CL0067	SIS	PGI	Phosphoglucose isomerase
PF00343	CL0113	GT-B	Phosphorylase	Carbohydrate phosphorylase
PF00344			SecY	SecY translocase
PF00345	CL0556	PapD-like	PapD_N	Pili and flagellar-assembly chaperone, PapD N-terminal domain
PF00346			Complex1_49kDa	Respiratory-chain NADH dehydrogenase, 49 Kd subunit
PF00347			Ribosomal_L6	Ribosomal protein L6
PF00348	CL0613	Terp_synthase	polyprenyl_synt	Polyprenyl synthetase
PF00349	CL0108	Actin_ATPase	Hexokinase_1	Hexokinase
PF00350	CL0023	P-loop_NTPase	Dynamin_N	Dynamin family
PF00351			Biopterin_H	Biopterin-dependent aromatic amino acid hydroxylase
PF00352	CL0407	TBP-like	TBP	Transcription factor TFIID (or TATA-binding protein, TBP)
PF00353	CL0592	beta_Roll	HemolysinCabind	Haemolysin-type calcium-binding repeat (2 copies)
PF00354	CL0004	Concanavalin	Pentaxin	Pentaxin family
PF00355	CL0516	ISP-domain	Rieske	Rieske [2Fe-2S] domain
PF00356	CL0123	HTH	LacI	Bacterial regulatory proteins, lacI family
PF00357			Integrin_alpha	Integrin alpha cytoplasmic region
PF00358	CL0105	Hybrid	PTS_EIIA_1	phosphoenolpyruvate-dependent sugar phosphotransferase system, EIIA 1
PF00359	CL0340	PTase-anion_tr	PTS_EIIA_2	Phosphoenolpyruvate-dependent sugar phosphotransferase system, EIIA 2
PF00360	CL0161	GAF	PHY	Phytochrome region
PF00361	CL0425	ComplexI-N	Proton_antipo_M	Proton-conducting membrane transporter
PF00362	CL0128	vWA-like	Integrin_beta	Integrin beta chain VWA domain
PF00363			Casein	Casein
PF00364	CL0105	Hybrid	Biotin_lipoyl	Biotin-requiring enzyme
PF00365	CL0240	PFK	PFK	Phosphofructokinase
PF00366	CL0021	OB	Ribosomal_S17	Ribosomal protein S17
PF00367			PTS_EIIB	phosphotransferase system, EIIB
PF00368			HMG-CoA_red	Hydroxymethylglutaryl-coenzyme A reductase
PF00370	CL0108	Actin_ATPase	FGGY_N	FGGY family of carbohydrate kinases, N-terminal domain
PF00372	CL0205	Di-copper	Hemocyanin_M	Hemocyanin, copper containing domain
PF00373	CL0632	FERM_M	FERM_M	FERM central domain
PF00374			NiFeSe_Hases	Nickel-dependent hydrogenase
PF00375			SDF	Sodium:dicarboxylate symporter family
PF00376	CL0123	HTH	MerR	MerR family regulatory protein
PF00377			Prion	Prion/Doppel alpha-helical domain
PF00378	CL0127	ClpP_crotonase	ECH_1	Enoyl-CoA hydratase/isomerase
PF00379			Chitin_bind_4	Insect cuticle protein
PF00380	CL0329	S5	Ribosomal_S9	Ribosomal protein S9/S16
PF00381			PTS-HPr	PTS HPr component phosphorylation site
PF00382	CL0065	Cyclin	TFIIB	Transcription factor TFIIB repeat
PF00383	CL0109	CDA	dCMP_cyt_deam_1	Cytidine and deoxycytidylate deaminase zinc-binding region
PF00384			Molybdopterin	Molybdopterin oxidoreductase
PF00385	CL0049	Tudor	Chromo	Chromo (CHRromatin Organisation MOdifier) domain
PF00386	CL0100	C1q_TNF	C1q	C1q domain
PF00387	CL0384	PLC	PI-PLC-Y	Phosphatidylinositol-specific phospholipase C, Y domain
PF00388	CL0384	PLC	PI-PLC-X	Phosphatidylinositol-specific phospholipase C, X domain
PF00389	CL0325	Form_Glyc_dh	2-Hacid_dh	D-isomer specific 2-hydroxyacid dehydrogenase, catalytic domain
PF00390	CL0603	AA_dh_N	malic	Malic enzyme, N-terminal domain
PF00391	CL0364	Leu-IlvD	PEP-utilizers	PEP-utilising enzyme, mobile domain
PF00392	CL0123	HTH	GntR	Bacterial regulatory proteins, gntR family
PF00393	CL0106	6PGD_C	6PGD	6-phosphogluconate dehydrogenase, C-terminal domain
PF00394	CL0026	CU_oxidase	Cu-oxidase	Multicopper oxidase
PF00395			SLH	S-layer homology domain
PF00396			Granulin	Granulin
PF00397			WW	WW domain
PF00398	CL0063	NADP_Rossmann	RrnaAD	Ribosomal RNA adenine dimethylase
PF00399			PIR	Yeast PIR protein repeat
PF00400	CL0186	Beta_propeller	WD40	WD domain, G-beta repeat
PF00401			ATP-synt_DE	ATP synthase, Delta/Epsilon chain, long alpha-helix domain
PF00402			Calponin	Calponin family repeat
PF00403			HMA	Heavy-metal-associated domain
PF00404	CL0220	EF_hand		Dockerin type I repeat
PF00405	CL0177	PBP	Transferrin	Transferrin
PF00406	CL0023	P-loop_NTPase	ADK	Adenylate kinase
PF00407	CL0209	Bet_V_1_like	Bet_v_1	Pathogenesis-related protein Bet v I family
PF00408			PGM_PMM_IV	Phosphoglucomutase/phosphomannomutase, C-terminal domain
PF00410			Ribosomal_S8	Ribosomal protein S8
PF00411	CL0267	S11_L18p	Ribosomal_S11	Ribosomal protein S11
PF00412	CL0167	Zn_Beta_Ribbon	LIM	LIM domain
PF00413	CL0126	Peptidase_MA	Peptidase_M10	Matrixin
PF00414			MAP1B_neuraxin	Neuraxin and MAP1B repeat
PF00415	CL0186	Beta_propeller	RCC1	Regulator of chromosome condensation (RCC1) repeat
PF00416	CL0303	H2TH	Ribosomal_S13	Ribosomal protein S13/S18
PF00418			Tubulin-binding	Tau and MAP protein, tubulin-binding repeat
PF00419	CL0204	Adhesin	Fimbrial	Fimbrial protein
PF00420			Oxidored_q2	NADH-ubiquinone/plastoquinone oxidoreductase chain 4L
PF00421			PSII	Photosystem II protein
PF00423	CL0434	Sialidase	HN	Haemagglutinin-neuraminidase
PF00424			REV	REV protein (anti-repression trans-activator protein)
PF00425			Chorismate_bind	chorismate binding enzyme
PF00426	CL0004	Concanavalin	VP4_haemagglut	Outer Capsid protein VP4 (Hemagglutinin) Concanavalin-like domain
PF00427			PBS_linker_poly	Phycobilisome Linker polypeptide
PF00428			Ribosomal_60s	60s Acidic ribosomal protein
PF00429			TLV_coat	ENV polyprotein (coat polyprotein)
PF00430	CL0255	ATP_synthase	ATP-synt_B	ATP synthase B/B' CF(0)
PF00431	CL0164	CUB	CUB	CUB domain
PF00432	CL0059	6_Hairpin	Prenyltrans	Prenyltransferase and squalene oxidase repeat
PF00433			Pkinase_C	Protein kinase C terminal domain
PF00434	CL0217	Rotavirus_VP7	VP7	Glycoprotein VP7
PF00435			Spectrin	Spectrin repeat
PF00436	CL0021	OB	SSB	Single-strand binding protein family
PF00437	CL0023	P-loop_NTPase	T2SSE	Type II/IV secretion system protein
PF00438			S-AdoMet_synt_N	S-adenosylmethionine synthetase, N-terminal domain
PF00439			Bromodomain	Bromodomain
PF00440	CL0123	HTH	TetR_N	Bacterial regulatory proteins, tetR family
PF00441	CL0087	Acyl-CoA_dh	Acyl-CoA_dh_1	Acyl-CoA dehydrogenase, C-terminal domain
PF00443	CL0125	Peptidase_CA	UCH	Ubiquitin carboxyl-terminal hydrolase
PF00444			Ribosomal_L36	Ribosomal protein L36
PF00445			Ribonuclease_T2	Ribonuclease T2 family
PF00446			GnRH	Gonadotropin-releasing hormone
PF00447	CL0123	HTH	HSF_DNA-bind	HSF-type DNA-binding
PF00448	CL0023	P-loop_NTPase	SRP54	SRP54-type protein, GTPase domain
PF00449	CL0034	Amidohydrolase	Urease_alpha	Urease alpha-subunit, N-terminal domain
PF00450	CL0028	AB_hydrolase	Peptidase_S10	Serine carboxypeptidase
PF00451	CL0054	Knottin_1	Toxin_2	Scorpion short toxin, BmKK2
PF00452	CL0551	BCLiA	Bcl-2	Apoptosis regulator proteins, Bcl-2 family
PF00453			Ribosomal_L20	Ribosomal protein L20
PF00454	CL0016	PKinase	PI3_PI4_kinase	Phosphatidylinositol 3- and 4-kinase
PF00455	CL0246	ISOCOT_Fold	DeoRC	DeoR C terminal sensor domain
PF00456	CL0254	THDP-binding	Transketolase_N	Transketolase, thiamine diphosphate binding domain
PF00457	CL0004	Concanavalin	Glyco_hydro_11	Glycosyl hydrolases family 11
PF00458	CL0600	S15_NS1	WHEP-TRS	WHEP-TRS domain
PF00459	CL0171	Phospoesterase	Inositol_P	Inositol monophosphatase family
PF00460			Flg_bb_rod	Flagella basal body rod protein
PF00462	CL0172	Thioredoxin	Glutaredoxin	Glutaredoxin
PF00463	CL0151	PK_TIM	ICL	Isocitrate lyase family
PF00464	CL0061	PLP_aminotran	SHMT	Serine hydroxymethyltransferase
PF00465	CL0224	DHQS	Fe-ADH	Iron-containing alcohol dehydrogenase
PF00466			Ribosomal_L10	Ribosomal protein L10
PF00467	CL0107	KOW	KOW	KOW motif
PF00468			Ribosomal_L34	Ribosomal protein L34
PF00469			F-protein	Negative factor, (F-Protein) or Nef
PF00471	CL0167	Zn_Beta_Ribbon	Ribosomal_L33	Ribosomal protein L33
PF00472	CL0337	RF	RF-1	RF-1 domain
PF00473			CRF	Corticotropin-releasing factor family
PF00474	CL0062	APC	SSF	Sodium:solute symporter family
PF00475	CL0329	S5	IGPD	Imidazoleglycerol-phosphate dehydratase
PF00476			DNA_pol_A	DNA polymerase family A
PF00477	CL0385	Hydrophilin	LEA_5	Small hydrophilic plant seed protein
PF00478	CL0036	TIM_barrel	IMPDH	IMP dehydrogenase / GMP reductase domain
PF00479	CL0063	NADP_Rossmann	G6PD_N	Glucose-6-phosphate dehydrogenase, NAD binding domain
PF00480	CL0108	Actin_ATPase	ROK	ROK family
PF00481	CL0238	PP2C	PP2C	Protein phosphatase 2C
PF00482			T2SSF	Type II secretion system (T2SS), protein F
PF00483	CL0110	GT-A	NTP_transferase	Nucleotidyl transferase
PF00484			Pro_CA	Carbonic anhydrase
PF00485	CL0023	P-loop_NTPase	PRK	Phosphoribulokinase / Uridine kinase family
PF00486	CL0123	HTH	Trans_reg_C	Transcriptional regulatory protein, C terminal
PF00487			FA_desaturase	Fatty acid desaturase
PF00488	CL0023	P-loop_NTPase	MutS_V	MutS domain V
PF00489	CL0053	4H_Cytokine	IL6	Interleukin-6/G-CSF/MGF family
PF00490	CL0036	TIM_barrel	ALAD	Delta-aminolevulinic acid dehydratase
PF00491	CL0302	Arginase	Arginase	Arginase family
PF00493	CL0023	P-loop_NTPase	MCM	MCM2/3/5 family
PF00494	CL0613	Terp_synthase	SQS_PSY	Squalene/phytoene synthase
PF00496	CL0177	PBP	SBP_bac_5	Bacterial extracellular solute-binding proteins, family 5 Middle
PF00497	CL0177	PBP	SBP_bac_3	Bacterial extracellular solute-binding proteins, family 3
PF00498	CL0357	SMAD-FHA	FHA	FHA domain
PF00499			Oxidored_q3	NADH-ubiquinone/plastoquinone oxidoreductase chain 6
PF00500			Late_protein_L1	L1 (late) protein
PF00501	CL0378	ANL	AMP-binding	AMP-binding enzyme
PF00502	CL0090	Globin	Phycobilisome	Phycobilisome protein
PF00503	CL0023	P-loop_NTPase	G-alpha	G-protein alpha subunit
PF00504			Chloroa_b-bind	Chlorophyll A-B binding protein
PF00505	CL0114	HMG-box	HMG_box	HMG (high mobility group) box
PF00506			Flu_NP	Influenza virus nucleoprotein
PF00507			Oxidored_q4	NADH-ubiquinone/plastoquinone oxidoreductase, chain 3
PF00508			PPV_E2_N	E2 (early) protein, N terminal
PF00509			Hemagglutinin	Haemagglutinin
PF00510			COX3	Cytochrome c oxidase subunit III
PF00511			PPV_E2_C	E2 (early) protein, C terminal
PF00512	CL0025	His_Kinase_A	HisKA	His Kinase A (phospho-acceptor) domain
PF00513			Late_protein_L2	Late Protein L2
PF00514	CL0020	TPR	Arm	Armadillo/beta-catenin-like repeat
PF00515	CL0020	TPR	TPR_1	Tetratricopeptide repeat
PF00516			GP120	Envelope glycoprotein GP120
PF00517			GP41	Retroviral envelope protein
PF00518			E6	Early Protein (E6)
PF00519	CL0023	P-loop_NTPase	PPV_E1_C	Papillomavirus helicase
PF00520	CL0030	Ion_channel	Ion_trans	Ion transport protein
PF00521			DNA_topoisoIV	DNA gyrase/topoisomerase IV, subunit A
PF00522			VPR	VPR/VPX protein
PF00523	CL0595	Fusion_gly	Fusion_gly	Fusion glycoprotein F0
PF00524			PPV_E1_N	E1 Protein, N terminal domain
PF00525			Crystallin	Alpha crystallin A chain, N terminal
PF00526			Dicty_CTDC	Dictyostelium (slime mold) repeat
PF00527			E7	E7 protein, Early protein
PF00528	CL0404	BPD_transp_1	BPD_transp_1	Binding-protein-dependent transport system inner membrane component
PF00529	CL0105	Hybrid	HlyD	HlyD membrane-fusion protein of T1SS
PF00530	CL0550	SRCR	SRCR	Scavenger receptor cysteine-rich domain
PF00531	CL0041	Death	Death	Death domain
PF00532	CL0144	Periplas_BP	Peripla_BP_1	Periplasmic binding proteins and sugar binding domain of LacI family
PF00533	CL0459	BRCT-like	BRCT	BRCA1 C Terminus (BRCT) domain
PF00534	CL0113	GT-B	Glycos_transf_1	Glycosyl transferases group 1
PF00535	CL0110	GT-A	Glycos_transf_2	Glycosyl transferase family 2
PF00536	CL0003	SAM	SAM_1	SAM domain (Sterile alpha motif)
PF00537	CL0054	Knottin_1	Toxin_3	Scorpion toxin-like domain
PF00538	CL0123	HTH	Linker_histone	linker histone H1 and H5 family
PF00539			Tat	Transactivating regulatory protein (Tat)
PF00540	CL0074	Matrix	Gag_p17	gag gene protein p17 (matrix protein)
PF00541	CL0326	Reo_sigma	Adeno_knob	Adenoviral fibre protein (knob domain)
PF00542			Ribosomal_L12	Ribosomal protein L7/L12 C-terminal domain
PF00543	CL0089	GlnB-like	P-II	Nitrogen regulatory protein P-II
PF00544	CL0268	Pec_lyase-like	Pec_lyase_C	Pectate lyase
PF00545			Ribonuclease	ribonuclease
PF00547			Urease_gamma	Urease, gamma subunit
PF00548	CL0124	Peptidase_PA	Peptidase_C3	3C cysteine protease (picornain 3C)
PF00549	CL0506	Succ_CoA_synth	Ligase_CoA	CoA-ligase
PF00550	CL0314	PP-binding	PP-binding	Phosphopantetheine attachment site
PF00551			Formyl_trans_N	Formyl transferase
PF00552			IN_DBD_C	Integrase DNA binding domain
PF00553	CL0203	CBD	CBM_2	Cellulose binding domain
PF00554	CL0073	P53-like	RHD_DNA_bind	Rel homology DNA-binding domain
PF00555	CL0568	Man_lectin	Endotoxin_M	delta endotoxin
PF00556			LHC	Antenna complex alpha/beta subunit
PF00557			Peptidase_M24	Metallopeptidase family M24
PF00558			Vpu	Vpu protein
PF00559			Vif	Retroviral Vif (Viral infectivity) protein
PF00560	CL0022	LRR	LRR_1	Leucine Rich Repeat
PF00561	CL0028	AB_hydrolase	Abhydrolase_1	alpha/beta hydrolase fold
PF00562	CL0410	LEF-8-like	RNA_pol_Rpb2_6	RNA polymerase Rpb2, domain 6
PF00563	CL0276	Nucleot_cyclase	EAL	EAL domain
PF00564	CL0072	Ubiquitin	PB1	PB1 domain
PF00565	CL0049	Tudor	SNase	Staphylococcal nuclease homologue
PF00566			RabGAP-TBC	Rab-GTPase-TBC domain
PF00567	CL0049	Tudor	TUDOR	Tudor domain
PF00568	CL0266	PH	WH1	WH1 domain
PF00569	CL0006	C1	ZZ	Zinc finger, ZZ type
PF00570	CL0426	HRDC-like	HRDC	HRDC domain
PF00571			CBS	CBS domain
PF00572			Ribosomal_L13	Ribosomal protein L13
PF00573			Ribosomal_L4	Ribosomal protein L4/L1 family
PF00574	CL0127	ClpP_crotonase	CLP_protease	Clp protease
PF00575	CL0021	OB	S1	S1 RNA binding domain
PF00576	CL0287	Transthyretin	Transthyretin	HIUase/Transthyretin family
PF00577	CL0193	MBB	Usher	Outer membrane usher protein
PF00578	CL0172	Thioredoxin	AhpC-TSA	AhpC/TSA family
PF00579	CL0039	HUP	tRNA-synt_1b	tRNA synthetases class I (W and Y)
PF00580	CL0023	P-loop_NTPase	UvrD-helicase	UvrD/REP helicase N-terminal domain
PF00581	CL0031	Phosphatase	Rhodanese	Rhodanese-like domain
PF00582	CL0039	HUP	Usp	Universal stress protein family
PF00583	CL0257	Acetyltrans	Acetyltransf_1	Acetyltransferase (GNAT) family
PF00584			SecE	SecE/Sec61-gamma subunits of protein translocation complex
PF00585	CL0070	ACT	Thr_dehydrat_C	C-terminal regulatory domain of Threonine dehydratase
PF00586			AIRS	AIR synthase related protein, N-terminal domain
PF00587	CL0040	tRNA_synt_II	tRNA-synt_2b	tRNA synthetase class II core domain (G, H, P, S and T)
PF00588	CL0098	SPOUT	SpoU_methylase	SpoU rRNA Methylase family
PF00589	CL0382	DNA-mend	Phage_integrase	Phage integrase family
PF00590			TP_methylase	Tetrapyrrole (Corrin/Porphyrin) Methylases
PF00591			Glycos_transf_3	Glycosyl transferase family, a/b domain
PF00593	CL0193	MBB	TonB_dep_Rec	TonB dependent receptor
PF00594	CL0001	EGF	Gla	Vitamin K-dependent carboxylation/gamma-carboxyglutamic (GLA) domain
PF00595	CL0466	PDZ-like	PDZ	PDZ domain (Also known as DHR or GLGF)
PF00596			Aldolase_II	Class II Aldolase and Adducin N-terminal domain
PF00598			Flu_M1	Influenza Matrix protein (M1)
PF00599			Flu_M2	Influenza Matrix protein (M2)
PF00600	CL0600	S15_NS1	Flu_NS1	Influenza non-structural protein (NS1)
PF00601			Flu_NS2	Influenza non-structural protein (NS2)
PF00602			Flu_PB1	Influenza RNA-dependent RNA polymerase subunit PB1
PF00603	CL0236	PDDEXK	Flu_PA	Influenza RNA-dependent RNA polymerase subunit PA
PF00604			Flu_PB2	Influenza RNA-dependent RNA polymerase subunit PB2
PF00605	CL0123	HTH	IRF	Interferon regulatory factor transcription factor
PF00606			Glycoprotein_B	Herpesvirus Glycoprotein B ectodomain
PF00607	CL0148	Viral_Gag	Gag_p24	gag gene protein p24 (core nucleocapsid protein)
PF00608			Adeno_shaft	Adenoviral fibre protein (repeat/shaft region)
PF00609			DAGK_acc	Diacylglycerol kinase accessory domain
PF00610	CL0123	HTH	DEP	Domain found in Dishevelled, Egl-10, and Pleckstrin (DEP)
PF00611	CL0145	Golgi-transport	FCH	Fes/CIP4, and EFC/F-BAR homology domain
PF00612	CL0220	EF_hand	IQ	IQ calmodulin-binding motif
PF00613	CL0020	TPR	PI3Ka	Phosphoinositide 3-kinase family, accessory domain (PIK domain)
PF00614	CL0479	PLD	PLDc	Phospholipase D Active site motif
PF00615	CL0272	RGS	RGS	Regulator of G protein signaling domain
PF00616	CL0409	GAP	RasGAP	GTPase-activator protein for Ras-like GTPase
PF00617			RasGEF	RasGEF domain
PF00618	CL0542	RAS_GEF_N	RasGEF_N	RasGEF N-terminal motif
PF00619	CL0041	Death	CARD	Caspase recruitment domain
PF00620	CL0409	GAP	RhoGAP	RhoGAP domain
PF00621			RhoGEF	RhoGEF domain
PF00622	CL0004	Concanavalin	SPRY	SPRY domain
PF00623			RNA_pol_Rpb1_2	RNA polymerase Rpb1, domain 2
PF00624			Flocculin	Flocculin repeat
PF00625	CL0023	P-loop_NTPase	Guanylate_kin	Guanylate kinase
PF00626	CL0092	ADF	Gelsolin	Gelsolin repeat
PF00627	CL0214	UBA	UBA	UBA/TS-N domain
PF00628	CL0390	zf-FYVE-PHD	PHD	PHD-finger
PF00629	CL0004	Concanavalin	MAM	MAM domain, meprin/A5/mu
PF00630	CL0159	E-set	Filamin	Filamin/ABP280 repeat
PF00631			G-gamma	GGL domain
PF00632	CL0552	Hect	HECT	HECT-domain (ubiquitin-transferase)
PF00633	CL0198	HHH	HHH	Helix-hairpin-helix motif
PF00634			BRCA2	BRCA2 repeat
PF00635	CL0556	PapD-like	Motile_Sperm	MSP (Major sperm protein) domain
PF00636	CL0539	RNase_III	Ribonuclease_3	Ribonuclease III domain
PF00637	CL0020	TPR	Clathrin	Region in Clathrin and VPS
PF00638	CL0266	PH	Ran_BP1	RanBP1 domain
PF00639	CL0487	FKBP	Rotamase	PPIC-type PPIASE domain
PF00640	CL0266	PH	PID	Phosphotyrosine interaction domain (PTB/PID)
PF00641	CL0167	Zn_Beta_Ribbon	zf-RanBP	Zn-finger in Ran binding protein and others
PF00642	CL0537	CCCH_zf	zf-CCCH	Zinc finger C-x8-C-x5-C-x3-H type (and similar)
PF00643			zf-B_box	B-box zinc finger
PF00644	CL0084	ADP-ribosyl	PARP	Poly(ADP-ribose) polymerase catalytic domain
PF00645	CL0167	Zn_Beta_Ribbon	zf-PARP	Poly(ADP-ribose) polymerase and DNA-Ligase Zn-finger region
PF00646	CL0271	F-box	F-box	F-box domain
PF00647			EF1G	Elongation factor 1 gamma, conserved domain
PF00648	CL0125	Peptidase_CA	Peptidase_C2	Calpain family cysteine protease
PF00649			Copper-fist	Copper fist DNA binding domain
PF00650	CL0512	CRAL_TRIO	CRAL_TRIO	CRAL/TRIO domain
PF00651	CL0033	POZ	BTB	BTB/POZ domain
PF00652	CL0066	Trefoil	Ricin_B_lectin	Ricin-type beta-trefoil lectin domain
PF00653	CL0417	BIR-like	BIR	Inhibitor of Apoptosis domain
PF00654			Voltage_CLC	Voltage gated chloride channel
PF00656	CL0093	Peptidase_CD	Peptidase_C14	Caspase domain
PF00657	CL0264	SGNH_hydrolase	Lipase_GDSL	GDSL-like Lipase/Acylhydrolase
PF00658			PABP	Poly-adenylate binding protein, unique domain
PF00659			POLO_box	POLO box duplicated region
PF00660			SRP1_TIP1	Seripauperin and TIP1 family
PF00661			Matrix	Viral matrix protein
PF00662			Proton_antipo_N	NADH-Ubiquinone oxidoreductase (complex I), chain 5 N-terminus
PF00664	CL0241	ABC_membrane	ABC_membrane	ABC transporter transmembrane region
PF00665	CL0219	RNase_H	rve	Integrase core domain
PF00666	CL0121	Cystatin	Cathelicidins	Cathelicidin
PF00667	CL0076	FAD_Lum_binding	FAD_binding_1	FAD binding domain
PF00668	CL0149	CoA-acyltrans	Condensation	Condensation domain
PF00669			Flagellin_N	Bacterial flagellin N-terminal helical region
PF00670	CL0063	NADP_Rossmann	AdoHcyase_NAD	S-adenosyl-L-homocysteine hydrolase, NAD binding domain
PF00672			HAMP	HAMP domain
PF00673			Ribosomal_L5_C	ribosomal L5P family C-terminus
PF00674			DUP	DUP family
PF00675	CL0094	Peptidase_ME	Peptidase_M16	Insulinase (Peptidase family M16)
PF00676	CL0254	THDP-binding	E1_dh	Dehydrogenase E1 component
PF00677	CL0076	FAD_Lum_binding	Lum_binding	Lumazine binding domain
PF00679	CL0437	EF-G_C	EFG_C	Elongation factor G C-terminus
PF00680	CL0027	RdRP	RdRP_1	RNA dependent RNA polymerase
PF00681			Plectin	Plectin repeat
PF00682	CL0036	TIM_barrel	HMGL-like	HMGL-like
PF00683			TB	TB domain
PF00684			DnaJ_CXXCXGXG	DnaJ central domain
PF00685	CL0023	P-loop_NTPase	Sulfotransfer_1	Sulfotransferase domain
PF00686	CL0369	GHD	CBM_20	Starch binding domain
PF00687			Ribosomal_L1	Ribosomal protein L1p/L10e family
PF00688			TGFb_propeptide	TGF-beta propeptide
PF00689			Cation_ATPase_C	Cation transporting ATPase, C-terminus
PF00690			Cation_ATPase_N	Cation transporter/ATPase, N-terminus
PF00691			OmpA	OmpA family
PF00692	CL0153	dUTPase	dUTPase	dUTPase
PF00693	CL0023	P-loop_NTPase	Herpes_TK	Thymidine kinase from herpesvirus
PF00694	CL0364	Leu-IlvD	Aconitase_C	Aconitase C-terminal domain
PF00695			vMSA	Major surface antigen from hepadnavirus
PF00696			AA_kinase	Amino acid kinase family
PF00697	CL0036	TIM_barrel	PRAI	N-(5'phosphoribosyl)anthranilate (PRA) isomerase
PF00698	CL0323	Patatin	Acyl_transf_1	Acyl transferase domain
PF00699			Urease_beta	Urease beta subunit
PF00700			Flagellin_C	Bacterial flagellin C-terminal helical region
PF00701	CL0036	TIM_barrel	DHDPS	Dihydrodipicolinate synthetase family
PF00702	CL0137	HAD	Hydrolase	haloacid dehalogenase-like hydrolase
PF00703			Glyco_hydro_2	Glycosyl hydrolases family 2
PF00704	CL0058	Glyco_hydro_tim	Glyco_hydro_18	Glycosyl hydrolases family 18
PF00705	CL0060	DNA_clamp	PCNA_N	Proliferating cell nuclear antigen, N-terminal domain
PF00706	CL0075	Defensin	Toxin_4	Anenome neurotoxin
PF00707			IF3_C	Translation initiation factor IF-3, C-terminal domain
PF00708	CL0622	Acylphosphatase	Acylphosphatase	Acylphosphatase
PF00709	CL0023	P-loop_NTPase	Adenylsucc_synt	Adenylosuccinate synthetase
PF00710			Asparaginase	Asparaginase, N-terminal
PF00711	CL0075	Defensin	Defensin_beta	Beta defensin
PF00712	CL0060	DNA_clamp	DNA_pol3_beta	DNA polymerase III beta subunit, N-terminal domain
PF00713	CL0620	Antihemostatic	Hirudin	Hirudin
PF00714	CL0053	4H_Cytokine	IFN-gamma	Interferon gamma
PF00715	CL0053	4H_Cytokine	IL2	Interleukin 2
PF00716	CL0201	Peptidase_SH	Peptidase_S21	Assemblin (Peptidase family S21)
PF00717	CL0299	Peptidase_SF	Peptidase_S24	Peptidase S24-like
PF00718			Polyoma_coat	Polyomavirus coat protein
PF00719			Pyrophosphatase	Inorganic pyrophosphatase
PF00720			SSI	Subtilisin inhibitor-like
PF00721			TMV_coat	Virus coat protein (TMV like)
PF00722	CL0004	Concanavalin	Glyco_hydro_16	Glycosyl hydrolases family 16
PF00723	CL0059	6_Hairpin	Glyco_hydro_15	Glycosyl hydrolases family 15
PF00724	CL0036	TIM_barrel	Oxidored_FMN	NADH:flavin oxidoreductase / NADH oxidase family
PF00725	CL0106	6PGD_C	3HCDH	3-hydroxyacyl-CoA dehydrogenase, C-terminal domain
PF00726	CL0053	4H_Cytokine	IL10	Interleukin 10
PF00727	CL0053	4H_Cytokine	IL4	Interleukin 4
PF00728	CL0058	Glyco_hydro_tim	Glyco_hydro_20	Glycosyl hydrolase family 20, catalytic domain
PF00729	CL0055	Viral_ssRNA_CP	Viral_coat	Viral coat protein (S domain)
PF00730	CL0198	HHH	HhH-GPD	HhH-GPD superfamily base excision DNA repair protein
PF00731			AIRC	AIR carboxylase
PF00732	CL0063	NADP_Rossmann	GMC_oxred_N	GMC oxidoreductase
PF00733	CL0039	HUP	Asn_synthase	Asparagine synthase
PF00734	CL0083	Omega_toxin	CBM_1	Fungal cellulose binding domain
PF00735	CL0023	P-loop_NTPase	Septin	Septin
PF00736			EF1_GNE	EF-1 guanine nucleotide exchange domain
PF00737			PsbH	Photosystem II 10 kDa phosphoprotein
PF00738			Polyhedrin	Polyhedrin
PF00739			X	Trans-activation protein X
PF00740	CL0605	ssDNA_NP_VP	Parvo_coat	Parvovirus coat protein VP2
PF00741			Gas_vesicle	Gas vesicle protein
PF00742			Homoserine_dh	Homoserine dehydrogenase
PF00743	CL0063	NADP_Rossmann	FMO-like	Flavin-binding monooxygenase-like
PF00745			GlutR_dimer	Glutamyl-tRNAGlu reductase, dimerisation domain
PF00746			Gram_pos_anchor	LPXTG cell wall anchor motif
PF00747			Viral_DNA_bp	ssDNA binding protein
PF00748			Calpain_inhib	Calpain inhibitor
PF00749	CL0039	HUP	tRNA-synt_1c	tRNA synthetases class I (E and Q), catalytic domain
PF00750	CL0039	HUP	tRNA-synt_1d	tRNA synthetases class I (R)
PF00751			DM	DM DNA binding domain
PF00752	CL0280	PIN	XPG_N	XPG N-terminal domain
PF00753	CL0381	Metallo-HOrase	Lactamase_B	Metallo-beta-lactamase superfamily
PF00754	CL0202	GBD	F5_F8_type_C	F5/8 type C domain
PF00755	CL0149	CoA-acyltrans	Carn_acyltransf	Choline/Carnitine o-acyltransferase
PF00756	CL0028	AB_hydrolase	Esterase	Putative esterase
PF00757	CL0547	GF_recep_C-rich	Furin-like	Furin-like cysteine rich region
PF00758	CL0053	4H_Cytokine	EPO_TPO	Erythropoietin/thrombopoietin
PF00759	CL0059	6_Hairpin	Glyco_hydro_9	Glycosyl hydrolase family 9
PF00760	CL0055	Viral_ssRNA_CP	Cucumo_coat	Cucumovirus coat protein
PF00761			Polyoma_coat2	Polyomavirus coat protein
PF00762	CL0043	Chelatase	Ferrochelatase	Ferrochelatase
PF00763	CL0603	AA_dh_N	THF_DHG_CYH	Tetrahydrofolate dehydrogenase/cyclohydrolase, catalytic domain
PF00764	CL0039	HUP	Arginosuc_synth	Arginosuccinate synthase
PF00765	CL0257	Acetyltrans	Autoind_synth	Autoinducer synthase
PF00766	CL0085	FAD_DHS	ETF_alpha	Electron transfer flavoprotein FAD-binding domain
PF00767			Poty_coat	Potyvirus coat protein
PF00768	CL0013	Beta-lactamase	Peptidase_S11	D-alanyl-D-alanine carboxypeptidase
PF00769			ERM	Ezrin/radixin/moesin family
PF00770	CL0125	Peptidase_CA	Peptidase_C5	Adenovirus endoprotease
PF00771			FHIPEP	FHIPEP family
PF00772			DnaB	DnaB-like helicase N terminal domain
PF00773			RNB	RNB domain
PF00775	CL0287	Transthyretin	Dioxygenase_C	Dioxygenase
PF00777			Glyco_transf_29	Glycosyltransferase family 29 (sialyltransferase)
PF00778	CL0072	Ubiquitin	DIX	DIX domain
PF00779			BTK	BTK motif
PF00780			CNH	CNH domain
PF00781	CL0240	PFK	DAGK_cat	Diacylglycerol kinase catalytic domain
PF00782	CL0031	Phosphatase	DSPc	Dual specificity phosphatase, catalytic domain
PF00784			MyTH4	MyTH4 domain
PF00786			PBD	P21-Rho-binding domain
PF00787			PX	PX domain
PF00788	CL0072	Ubiquitin	RA	Ras association (RalGDS/AF-6) domain
PF00789	CL0072	Ubiquitin	UBX	UBX domain
PF00790	CL0009	ENTH_VHS	VHS	VHS domain
PF00791			ZU5	ZU5 domain
PF00792	CL0154	C2	PI3K_C2	Phosphoinositide 3-kinase C2
PF00793	CL0036	TIM_barrel	DAHP_synth_1	DAHP synthetase I family
PF00794	CL0072	Ubiquitin	PI3K_rbd	PI3-kinase family, ras-binding domain
PF00795			CN_hydrolase	Carbon-nitrogen hydrolase
PF00796			PSI_8	Photosystem I reaction centre subunit VIII
PF00797	CL0125	Peptidase_CA	Acetyltransf_2	N-acetyltransferase
PF00798			Arena_glycoprot	Arenavirus glycoprotein
PF00799	CL0169	Rep	Gemini_AL1	Geminivirus Rep catalytic domain
PF00800	CL0177	PBP	PDT	Prephenate dehydratase
PF00801	CL0159	E-set	PKD	PKD domain
PF00802			Glycoprotein_G	Pneumovirus attachment glycoprotein G
PF00803	CL0571	30K_movement	3A	3A/RNA2 movement protein family
PF00804	CL0445	SNARE-fusion	Syntaxin	Syntaxin
PF00805	CL0505	Pentapeptide	Pentapeptide	Pentapeptide repeats (8 copies)
PF00806	CL0020	TPR	PUF	Pumilio-family RNA binding repeat
PF00807			Apidaecin	Apidaecin
PF00808	CL0012	Histone	CBFD_NFYB_HMF	Histone-like transcription factor (CBF/NF-Y) and archaeal histone
PF00809	CL0036	TIM_barrel	Pterin_bind	Pterin binding enzyme
PF00810	CL0141	MtN3-like	ER_lumen_recept	ER lumen protein retaining receptor
PF00811			Ependymin	Ependymin
PF00812	CL0026	CU_oxidase	Ephrin	Ephrin
PF00813			FliP	FliP family
PF00814	CL0108	Actin_ATPase	Peptidase_M22	Glycoprotease family
PF00815	CL0099	ALDH-like	Histidinol_dh	Histidinol dehydrogenase
PF00816			Histone_HNS	H-NS histone family
PF00817			IMS	impB/mucB/samB family
PF00818			Ice_nucleation	Ice nucleation protein repeat
PF00819	CL0075	Defensin	Myotoxins	Myotoxin, crotamine
PF00820			Lipoprotein_1	Borrelia lipoprotein
PF00821	CL0374	PEP-carboxyk	PEPCK_C	Phosphoenolpyruvate carboxykinase C-terminal P-loop domain
PF00822	CL0375	Transporter	PMP22_Claudin	PMP-22/EMP/MP20/Claudin family
PF00823	CL0352	EsxAB	PPE	PPE family
PF00825	CL0329	S5	Ribonuclease_P	Ribonuclease P
PF00827	CL0652	S24e_L23_L15e	Ribosomal_L15e	Ribosomal L15
PF00828	CL0588	Ribos_L15p_L18e	Ribosomal_L27A	Ribosomal proteins 50S-L15, 50S-L18e, 60S-L27A
PF00829			Ribosomal_L21p	Ribosomal prokaryotic L21 protein
PF00830			Ribosomal_L28	Ribosomal L28 family
PF00831	CL0346	Ribo_L29	Ribosomal_L29	Ribosomal L29 protein
PF00832			Ribosomal_L39	Ribosomal L39 protein
PF00833			Ribosomal_S17e	Ribosomal S17
PF00834	CL0036	TIM_barrel	Ribul_P_3_epim	Ribulose-phosphate 3 epimerase family
PF00835			SNAP-25	SNAP-25 family
PF00836			Stathmin	Stathmin family
PF00837	CL0172	Thioredoxin	T4_deiodinase	Iodothyronine deiodinase
PF00838	CL0080	Beta-tent	TCTP	Translationally controlled tumour protein
PF00839			Cys_rich_FGFR	Cysteine rich repeat
PF00840	CL0004	Concanavalin	Glyco_hydro_7	Glycosyl hydrolase family 7
PF00841			Protamine_P2	Sperm histone P2
PF00842			Ala_racemase_C	Alanine racemase, C-terminal domain
PF00843			Arena_nucleocap	Arenavirus nucleocapsid N-terminal domain
PF00844			Gemini_coat	Geminivirus coat protein/nuclear export factor BR1 family
PF00845	CL0571	30K_movement	Gemini_BL1	Geminivirus BL1 movement protein
PF00846			Hanta_nucleocap	Hantavirus nucleocapsid protein
PF00847	CL0081	MBD-like	AP2	AP2 domain
PF00848	CL0209	Bet_V_1_like	Ring_hydroxyl_A	Ring hydroxylating alpha subunit (catalytic domain)
PF00849	CL0649	PseudoU_synth	PseudoU_synth_2	RNA pseudouridylate synthase
PF00850	CL0302	Arginase	Hist_deacetyl	Histone deacetylase domain
PF00851	CL0125	Peptidase_CA	Peptidase_C6	Helper component proteinase
PF00852	CL0113	GT-B	Glyco_transf_10	Glycosyltransferase family 10 (fucosyltransferase) C-term
PF00853	CL0073	P53-like	Runt	Runt domain
PF00854	CL0015	MFS	PTR2	POT family
PF00855	CL0049	Tudor	PWWP	PWWP domain
PF00856			SET	SET domain
PF00857			Isochorismatase	Isochorismatase family
PF00858			ASC	Amiloride-sensitive sodium channel
PF00859			CTF_NFI	CTF/NF-I family transcription modulation region
PF00860	CL0062	APC	Xan_ur_permease	Permease family
PF00861	CL0267	S11_L18p	Ribosomal_L18p	Ribosomal L18 of archaea, bacteria, mitoch. and chloroplast
PF00862	CL0113	GT-B	Sucrose_synth	Sucrose synthase
PF00863	CL0124	Peptidase_PA	Peptidase_C4	Peptidase family C4
PF00864			P2X_receptor	ATP P2X receptor
PF00865			Osteopontin	Osteopontin
PF00866	CL0051	NTF2	Ring_hydroxyl_B	Ring hydroxylating beta subunit
PF00867	CL0464	5_3_exonuc_C	XPG_I	XPG I-region
PF00868			Transglut_N	Transglutaminase family
PF00869	CL0543	Viral_gly_cn_dm	Flavi_glycoprot	Flavivirus glycoprotein, central and dimerisation domains
PF00870	CL0073	P53-like	P53	P53 DNA-binding domain
PF00871	CL0108	Actin_ATPase	Acetate_kinase	Acetokinase family
PF00872	CL0219	RNase_H	Transposase_mut	Transposase, Mutator family
PF00873	CL0322	RND_permease	ACR_tran	AcrB/AcrD/AcrF family
PF00874	CL0166	PRD	PRD	PRD domain
PF00875	CL0039	HUP	DNA_photolyase	DNA photolyase
PF00876	CL0375	Transporter	Innexin	Innexin
PF00877	CL0125	Peptidase_CA	NLPC_P60	NlpC/P60 family
PF00878	CL0226	M6PR	CIMR	Cation-independent mannose-6-phosphate receptor repeat
PF00879			Defensin_propep	Defensin propeptide
PF00880			Nebulin	Nebulin repeat
PF00881	CL0529	FMN-dep-NRtase	Nitroreductase	Nitroreductase family
PF00882	CL0368	PhosC-NucP1	Zn_dep_PLPC	Zinc dependent phospholipase C
PF00883	CL0035	Peptidase_MH	Peptidase_M17	Cytosol aminopeptidase family, catalytic domain
PF00884	CL0088	Alk_phosphatase	Sulfatase	Sulfatase
PF00885			DMRL_synthase	6,7-dimethyl-8-ribityllumazine synthase
PF00886			Ribosomal_S16	Ribosomal protein S16
PF00887	CL0632	FERM_M	ACBP	Acyl CoA binding protein
PF00888			Cullin	Cullin family
PF00889			EF_TS	Elongation factor TS
PF00890	CL0063	NADP_Rossmann	FAD_binding_2	FAD binding domain
PF00891	CL0063	NADP_Rossmann	Methyltransf_2	O-methyltransferase
PF00892	CL0184	DMT	EamA	EamA-like transporter family
PF00893	CL0184	DMT	Multi_Drug_Res	Small Multidrug Resistance protein
PF00894	CL0055	Viral_ssRNA_CP	Luteo_coat	Luteovirus coat protein
PF00895	CL0255	ATP_synthase	ATP-synt_8	ATP synthase protein 8
PF00897			Orbi_VP7	Orbivirus inner capsid protein VP7
PF00898			Orbi_VP2	Orbivirus outer capsid protein VP2
PF00899	CL0063	NADP_Rossmann	ThiF	ThiF family
PF00900			Ribosomal_S4e	Ribosomal family S4e
PF00901			Orbi_VP5	Orbivirus outer capsid protein VP5
PF00902			TatC	Sec-independent protein translocase protein (TatC)
PF00903	CL0104	Glyoxalase	Glyoxalase	Glyoxalase/Bleomycin resistance protein/Dioxygenase superfamily
PF00904			Involucrin	Involucrin repeat
PF00905	CL0013	Beta-lactamase	Transpeptidase	Penicillin binding protein transpeptidase domain
PF00906			Hepatitis_core	Hepatitis core antigen
PF00907	CL0073	P53-like	T-box	T-box
PF00908	CL0029	Cupin	dTDP_sugar_isom	dTDP-4-dehydrorhamnose 3,5-epimerase
PF00909			Ammonium_transp	Ammonium Transporter Family
PF00910	CL0023	P-loop_NTPase	RNA_helicase	RNA helicase
PF00912	CL0037	Lysozyme	Transgly	Transglycosylase
PF00913			Trypan_glycop	Trypanosome variant surface glycoprotein (A-type)
PF00915	CL0055	Viral_ssRNA_CP	Calici_coat	Calicivirus coat protein
PF00916	CL0062	APC	Sulfate_transp	Sulfate permease family
PF00917	CL0389	TRAF	MATH	MATH domain
PF00918			Gastrin	Gastrin/cholecystokinin family
PF00919	CL0304	CheY	UPF0004	Uncharacterized protein family UPF0004
PF00920			ILVD_EDD	Dehydratase family
PF00921			Lipoprotein_2	Borrelia lipoprotein
PF00922			Phosphoprotein	Vesiculovirus phosphoprotein
PF00923	CL0036	TIM_barrel	TAL_FSA	Transaldolase/Fructose-6-phosphate aldolase
PF00924			MS_channel	Mechanosensitive ion channel
PF00925			GTP_cyclohydro2	GTP cyclohydrolase II
PF00926			DHBP_synthase	3,4-dihydroxy-2-butanone 4-phosphate synthase
PF00927	CL0159	E-set	Transglut_C	Transglutaminase family, C-terminal ig like domain
PF00928	CL0448	Cargo_bd_muHD	Adap_comp_sub	Adaptor complexes medium subunit family
PF00929	CL0219	RNase_H	RNase_T	Exonuclease
PF00930	CL0186	Beta_propeller	DPPIV_N	Dipeptidyl peptidase IV (DPP IV) N-terminal region
PF00931	CL0023	P-loop_NTPase	NB-ARC	NB-ARC domain
PF00932			LTD	Lamin Tail Domain
PF00933	CL0058	Glyco_hydro_tim	Glyco_hydro_3	Glycosyl hydrolase family 3 N terminal domain
PF00934	CL0352	EsxAB	PE	PE family
PF00935	CL0167	Zn_Beta_Ribbon	Ribosomal_L44	Ribosomal protein L44
PF00936			BMC	BMC domain
PF00937			Corona_nucleoca	Coronavirus nucleocapsid protein
PF00938			Lipoprotein_3	Lipoprotein
PF00939	CL0182	IT	Na_sulph_symp	Sodium:sulfate symporter transmembrane region
PF00940			RNA_pol	DNA-dependent RNA polymerase
PF00941	CL0077	FAD_PCMH	FAD_binding_5	FAD binding domain in molybdopterin dehydrogenase
PF00942	CL0203	CBD	CBM_3	Cellulose binding domain
PF00943			Alpha_E2_glycop	Alphavirus E2 glycoprotein
PF00944	CL0124	Peptidase_PA	Peptidase_S3	Alphavirus core protein
PF00945			Rhabdo_ncap	Rhabdovirus nucleocapsid protein
PF00946			Mononeg_RNA_pol	Mononegavirales RNA dependent RNA polymerase
PF00947	CL0124	Peptidase_PA	Pico_P2A	Picornavirus core protein 2A
PF00948			Flavi_NS1	Flavivirus non-structural Protein NS1
PF00949	CL0124	Peptidase_PA	Peptidase_S7	Peptidase S7, Flavivirus NS3 serine protease
PF00950	CL0142	Membrane_trans	ABC-3	ABC 3 transport family
PF00951			Arteri_Gl	Arterivirus GL envelope glycoprotein
PF00952			Bunya_nucleocap	Bunyavirus nucleocapsid (N) protein
PF00953			Glycos_transf_4	Glycosyl transferase family 4
PF00954			S_locus_glycop	S-locus glycoprotein domain
PF00955	CL0062	APC	HCO3_cotransp	HCO3- transporter family
PF00956			NAP	Nucleosome assembly protein (NAP)
PF00957	CL0445	SNARE-fusion	Synaptobrevin	Synaptobrevin
PF00958			GMP_synt_C	GMP synthase C terminal domain
PF00959	CL0037	Lysozyme	Phage_lysozyme	Phage lysozyme
PF00960			Neocarzinostat	Neocarzinostatin family
PF00961	CL0324	Homing_endonuc	LAGLIDADG_1	LAGLIDADG endonuclease
PF00962	CL0034	Amidohydrolase	A_deaminase	Adenosine/AMP deaminase
PF00963	CL0203	CBD	Cohesin	Cohesin domain
PF00964			Elicitin	Elicitin
PF00965	CL0353	TIMP-like	TIMP	Tissue inhibitor of metalloproteinase
PF00967	CL0199	DPBB	Barwin	Barwin family
PF00969	CL0343	MHC	MHC_II_beta	Class II histocompatibility antigen, beta domain
PF00970	CL0076	FAD_Lum_binding	FAD_binding_6	Oxidoreductase FAD-binding domain
PF00971			EIAV_GP90	EIAV coat protein, gp90
PF00972	CL0027	RdRP	Flavi_NS5	Flavivirus RNA-directed RNA polymerase
PF00973	CL0156	Nucleocapsid	Paramyxo_ncap	Paramyxovirus nucleocapsid protein
PF00974			Rhabdo_glycop	Rhabdovirus spike glycoprotein
PF00975	CL0028	AB_hydrolase	Thioesterase	Thioesterase domain
PF00976			ACTH_domain	Corticotropin ACTH domain
PF00977	CL0036	TIM_barrel	His_biosynth	Histidine biosynthesis protein
PF00978	CL0027	RdRP	RdRP_2	RNA dependent RNA polymerase
PF00979			Reovirus_cap	Reovirus outer capsid protein, Sigma 3
PF00980			Rota_Capsid_VP6	Rotavirus major capsid protein VP6
PF00981			Rota_NS53	Rotavirus RNA-binding Protein 53 (NS53)
PF00982	CL0113	GT-B	Glyco_transf_20	Glycosyltransferase family 20
PF00983	CL0055	Viral_ssRNA_CP	Tymo_coat	Tymovirus coat protein
PF00984	CL0106	6PGD_C	UDPG_MGDP_dh	UDP-glucose/GDP-mannose dehydrogenase family, central domain
PF00985			MSA_2	Merozoite Surface Antigen 2 (MSA-2) family
PF00986			DNA_gyraseB_C	DNA gyrase B subunit, carboxyl terminus
PF00988	CL0364	Leu-IlvD	CPSase_sm_chain	Carbamoyl-phosphate synthase small chain, CPSase domain
PF00989	CL0183	PAS_Fold	PAS	PAS fold
PF00990	CL0276	Nucleot_cyclase	GGDEF	Diguanylate cyclase, GGDEF domain
PF00992			Troponin	Troponin
PF00993	CL0343	MHC	MHC_II_alpha	Class II histocompatibility antigen, alpha domain
PF00994			MoCF_biosynth	Probable molybdopterin binding domain
PF00995			Sec1	Sec1 family
PF00996	CL0063	NADP_Rossmann	GDI	GDP dissociation inhibitor
PF00997			Casein_kappa	Kappa casein
PF00998	CL0027	RdRP	RdRP_3	Viral RNA dependent RNA polymerase
PF00999	CL0064	CPA_AT	Na_H_Exchanger	Sodium/hydrogen exchanger family
PF01000			RNA_pol_A_bac	RNA polymerase Rpb3/RpoA insert domain
PF01001			HCV_NS4b	Hepatitis C virus non-structural protein NS4b
PF01002			Flavi_NS2B	Flavivirus non-structural protein NS2B
PF01003			Flavi_capsid	Flavivirus capsid protein C
PF01004			Flavi_M	Flavivirus envelope glycoprotein M
PF01005			Flavi_NS2A	Flavivirus non-structural protein NS2A
PF01006			HCV_NS4a	Hepatitis C virus non-structural protein NS4a
PF01007	CL0030	Ion_channel	IRK	Inward rectifier potassium channel
PF01008	CL0246	ISOCOT_Fold	IF-2B	Initiation factor 2 subunit family
PF01010			Proton_antipo_C	NADH-dehyrogenase subunit F, TMs, (complex I) C-terminus
PF01011	CL0186	Beta_propeller	PQQ	PQQ enzyme repeat
PF01012	CL0039	HUP	ETF	Electron transfer flavoprotein domain
PF01014	CL0334	THBO-biosyn	Uricase	Uricase
PF01015			Ribosomal_S3Ae	Ribosomal S3Ae family
PF01016			Ribosomal_L27	Ribosomal L27 protein
PF01017			STAT_alpha	STAT protein, all-alpha domain
PF01018			GTP1_OBG	GTP1/OBG
PF01019	CL0052	NTN	G_glu_transpept	Gamma-glutamyltranspeptidase
PF01020	CL0167	Zn_Beta_Ribbon	Ribosomal_L40e	Ribosomal L40e family
PF01021			TYA	TYA transposon protein
PF01022	CL0123	HTH	HTH_5	Bacterial regulatory protein, arsR family
PF01023	CL0220	EF_hand	S_100	S-100/ICaBP type calcium binding domain
PF01024			Colicin	Colicin pore forming domain
PF01025			GrpE	GrpE
PF01026	CL0034	Amidohydrolase	TatD_DNase	TatD related DNase
PF01027	CL0453	Apoptosis-Inhib	Bax1-I	Inhibitor of apoptosis-promoting Bax1
PF01028	CL0382	DNA-mend	Topoisom_I	Eukaryotic DNA topoisomerase I, catalytic core
PF01029	CL0633	NusB	NusB	NusB family
PF01030	CL0022	LRR	Recep_L_domain	Receptor L domain
PF01031			Dynamin_M	Dynamin central region
PF01032	CL0142	Membrane_trans	FecCD	FecCD transport family
PF01033			Somatomedin_B	Somatomedin B domain
PF01034			Syndecan	Syndecan domain
PF01035			DNA_binding_1	6-O-methylguanine DNA methyltransferase, DNA binding domain
PF01036	CL0192	GPCR_A	Bac_rhodopsin	Bacteriorhodopsin-like protein
PF01037	CL0032	Dim_A_B_barrel	AsnC_trans_reg	Lrp/AsnC ligand binding domain
PF01039	CL0127	ClpP_crotonase	Carboxyl_trans	Carboxyl transferase domain
PF01040	CL0613	Terp_synthase	UbiA	UbiA prenyltransferase family
PF01041	CL0061	PLP_aminotran	DegT_DnrJ_EryC1	DegT/DnrJ/EryC1/StrS aminotransferase family
PF01042	CL0534	YjgF-like	Ribonuc_L-PSP	Endoribonuclease L-PSP
PF01043			SecA_PP_bind	SecA preprotein cross-linking domain
PF01044			Vinculin	Vinculin family
PF01047	CL0123	HTH	MarR	MarR family
PF01048	CL0408	PUP	PNP_UDP_1	Phosphorylase superfamily
PF01049			Cadherin_C	Cadherin cytoplasmic region
PF01050	CL0029	Cupin	MannoseP_isomer	Mannose-6-phosphate isomerase
PF01051	CL0123	HTH	Rep_3	Initiator Replication protein
PF01052			FliMN_C	Type III flagellar switch regulator (C-ring) FliN C-term
PF01053	CL0061	PLP_aminotran	Cys_Met_Meta_PP	Cys/Met metabolism PLP-dependent enzyme
PF01054			MMTV_SAg	Mouse mammary tumour virus superantigen
PF01055	CL0058	Glyco_hydro_tim	Glyco_hydro_31	Glycosyl hydrolases family 31
PF01056			Myc_N	Myc amino-terminal region
PF01057	CL0023	P-loop_NTPase	Parvo_NS1	Parvovirus non-structural protein NS1
PF01058			Oxidored_q6	NADH ubiquinone oxidoreductase, 20 Kd subunit
PF01059			Oxidored_q5_N	NADH-ubiquinone oxidoreductase chain 4, amino terminus
PF01060	CL0287	Transthyretin	TTR-52	Transthyretin-like family
PF01061	CL0181	ABC-2	ABC2_membrane	ABC-2 type transporter
PF01062			Bestrophin	Bestrophin, RFP-TM, chloride channel
PF01063			Aminotran_4	Amino-transferase class IV
PF01064	CL0117	uPAR_Ly6_toxin	Activin_recp	Activin types I and II receptor domain
[truncated: 15,694 more rows]
