# Supplementary material for: Application of Transcriptomics to Compare the Carbohydrate Active Enzymes That Are Expressed by Diverse Genera of Anaerobic Fungi to Degrade Plant Cell Wall Carbohydrates
Source: Front Microbiol. 2018 Jul 16;9:1581. doi: 10.3389/fmicb.2018.01581 (PMC6054980; doi:10.3389/fmicb.2018.01581)
Supplement: Supplementary file 14 [file Table_5.XLSX]

## Sheet: Sheet1
Supplementary Table S5: Comparison of carbohydrate active enzyme families that have activities targeting carbohydrates in the plant cell wall in anaerobic fungi, aerobic fungi, rumen bacteria and non-rumen bacteria.
	Mean number of transcripts in CAZy family*				Percentage of organisms within group encoding CAZy family
CAZy Family	Anaerobic fungi	Aerobic fungi	Rumen bacteria	Non-Rumen bacteria	Anaerobic fungi (6)	Aerobic fungi (104)	Rumen bacteria (82)	Non-Rumen bacteria (83)	Known Activities
AA1	0	11.625	1.4	1.89474	0	1	0.102041	0.358491	Laccase / p-diphenol:oxygen oxidoreductase / ferroxidase (EC 1.10.3.2); ; ferroxidase (EC 1.10.3.-); Laccase-like multicopper oxidase (EC 1.10.3.-)
AA2	0	7.15385	1	1.07692	0	1	0.0204082	0.245283	manganese peroxidase (EC 1.11.1.13); versatile peroxidase (EC 1.11.1.16); lignin peroxidase (EC 1.11.1.14); peroxidase (EC 1.11.1.-)
AA3	0	24.7961	1.6	2.90476	0	0.990385	0.204082	0.396226	cellobiose dehydrogenase (EC 1.1.99.18); glucose 1-oxidase (EC 1.1.3.4); aryl alcohol oxidase (EC 1.1.3.7); alcohol oxidase (EC 1.1.3.13); pyranose oxidase (EC 1.1.3.10)
AA5	0	4.24752	0	2	0	0.971154	0	0.0377358	Oxidase with oxygen as acceptor (EC 1.1.3.-); galactose oxidase (EC 1.1.3.9); glyoxal oxidase (EC 1.2.3.15); alcohol oxidase (EC 1.1.3.13)
AA7	0	23.4615	2	2.9375	0	1	0.122449	0.301887	glucooligosaccharide oxidase (EC 1.1.3.-); chitooligosaccharide oxidase (EC 1.1.3.-)
AA9	0	14.0825	0	0	0	0.932692	0	0	AA9 (formerly GH61) proteins are copper-dependent lytic polysaccharide monooxygenases (LPMOs); cleavage of cellulose chains with oxidation of various carbons (C-1, C-4 and C-6) has been reported several times in the literature
AA10	0	1.2	3.66667	2	0	0.0480769	0.0612245	0.132075	AA10 (formerly CBM33) proteins are copper-dependent lytic polysaccharide monooxygenases (LPMOs); some proteins have been shown to act on chitin, others on cellulose
AA11	0	3.925	0	0	0	0.769231	0	0	AA11 proteins are copper-dependent lytic polysaccharide monooxygenases (LPMOs); cleavage of chitin chains with oxidation of C-1 has been demonstrated for a AA11 LPMO from Aspergillus oryzae
CE1	21	4	3	3	1	1	0.979592	1	acetyl xylan esterase (EC 3.1.1.72); cinnamoyl esterase (EC 3.1.1.-); feruloyl esterase (EC 3.1.1.73); carboxylesterase (EC 3.1.1.1); S-formylglutathione hydrolase (EC 3.1.2.12); diacylglycerol O-acyltransferase (EC 2.3.1.20); trehalose 6-O-mycolyltransferase (EC 2.3.1.122)
CE2	4.6	1.45714	2.03571	1.57143	1	0.673077	0.571429	0.396226	acetyl xylan esterase (EC 3.1.1.72)
CE3	5.6	4.24194	2.7619	3.02326	0.833333	0.596154	0.857143	0.811321	acetyl xylan esterase (EC 3.1.1.72).
CE4	42.8	9.36893	3.6087	4.54	1	0.990385	0.938776	0.943396	acetyl xylan esterase (EC 3.1.1.72); chitin deacetylase (EC 3.5.1.41); chitooligosaccharide deacetylase (EC 3.5.1.-); peptidoglycan GlcNAc deacetylase (EC 3.5.1.-); peptidoglycan N-acetylmuramic acid deacetylase (EC 3.5.1.-)
CE5	0	7.16	1	1.33333	0	0.721154	0.0204082	0.0566038	acetyl xylan esterase (EC 3.1.1.72); cutinase (EC 3.1.1.74)
CE6	11.8	1	3.2963	2.80645	1	0.0288462	0.55102	0.584906	acetyl xylan esterase (EC 3.1.1.72)
CE8	5.2	3.18681	2.45	1.82759	1	0.875	0.408163	0.54717	pectin methylesterase (EC 3.1.1.11)
CE12	5.6	2.88119	2.33333	2.09091	1	0.971154	0.55102	0.622642	pectin acetylesterase (EC 3.1.1.-); rhamnogalacturonan acetylesterase (EC 3.1.1.-); acetyl xylan esterase (EC 3.1.1.72)
CE13	0	2	1.2	1.5	0	0.00961538	0.102041	0.0377358	pectin acetylesterase (EC 3.1.1.-)
CE15	3.25	1.8125	1.22222	1.625	0.833333	0.615385	0.367347	0.301887	4-O-methyl-glucuronoyl methylesterase (EC 3.1.1.-)
CE16	9.8	5.93069	0	1.125	1	0.971154	0	0.150943	acetylesterase (EC 3.1.1.6) active on various carbohydrate acetyl esters
GH1	7.8	2.76344	5.2	2.53659	1	0.894231	0.510204	0.773585	β-glucosidase (EC 3.2.1.21); β-galactosidase (EC 3.2.1.23); β-mannosidase (EC 3.2.1.25); β-glucuronidase (EC 3.2.1.31); β-xylosidase (EC 3.2.1.37); β-D-fucosidase (EC 3.2.1.38); phlorizin hydrolase (EC 3.2.1.62); exo-β-1,4-glucanase (EC 3.2.1.74); 6-phospho-β-galactosidase (EC 3.2.1.85); 6-phospho-β-glucosidase (EC 3.2.1.86); strictosidine β-glucosidase (EC 3.2.1.105); lactase (EC 3.2.1.108); amy…
GH2	1.4	4.72277	6.5814	6.14286	1	0.971154	0.877551	0.924528	β-galactosidase (EC 3.2.1.23) ; β-mannosidase (EC 3.2.1.25); β-glucuronidase (EC 3.2.1.31); α-L-arabinofuranosidase (EC 3.2.1.55); mannosylglycoprotein endo-β-mannosidase (EC 3.2.1.152); exo-β-glucosaminidase (EC 3.2.1.165)
GH3	14.2	12.7596	6.02273	4.96154	1	1	0.897959	0.981132	β-glucosidase (EC 3.2.1.21); xylan 1,4-β-xylosidase (EC 3.2.1.37); β-glucosylceramidase (EC 3.2.1.45); β-N-acetylhexosaminidase (EC 3.2.1.52); α-L-arabinofuranosidase (EC 3.2.1.55); glucan 1,3-β-glucosidase (EC 3.2.1.58); glucan 1,4-β-glucosidase (EC 3.2.1.74); isoprimeverose-producing oligoxyloglucan hydrolase (EC 3.2.1.120); coniferin β-glucosidase (EC 3.2.1.126); exo-1,3-1,4-glucanase (EC 3.2.…
GH5	38.2	17.4423	4.33333	5.56522	1	1	0.857143	0.867925	endo-β-1,4-glucanase / cellulase (EC 3.2.1.4); endo-β-1,4-xylanase (EC 3.2.1.8); β-glucosidase (EC 3.2.1.21); β-mannosidase (EC 3.2.1.25); β-glucosylceramidase (EC 3.2.1.45); glucan β-1,3-glucosidase (EC 3.2.1.58); licheninase (EC 3.2.1.73); exo-β-1,4-glucanase / cellodextrinase (EC 3.2.1.74); glucan endo-1,6-β-glucosidase (EC 3.2.1.75); mannan endo-β-1,4-mannosidase (EC 3.2.1.78); cellulose β-1,…
GH6	29.8	2.08333	3	2.3	1	0.692308	0.0204082	0.188679	endoglucanase (EC 3.2.1.4); cellobiohydrolase (EC 3.2.1.91)
GH7	0	4.08537	0	0	0	0.788462	0	0	endo-β-1,4-glucanase (EC 3.2.1.4); reducing end-acting cellobiohydrolase (EC 3.2.1.176); chitosanase (EC 3.2.1.132); endo-β-1,3-1,4-glucanase (EC 3.2.1.73)
GH8	2	1.25	1.5	1.88889	1	0.0384615	0.326531	0.339623	chitosanase (EC 3.2.1.132); cellulase (EC 3.2.1.4); licheninase (EC 3.2.1.73); endo-1,4-β-xylanase (EC 3.2.1.8); reducing-end-xylose releasing exo-oligoxylanase (EC 3.2.1.156)
GH9	12.2	1.375	3.08	4.92857	1	0.384615	0.510204	0.528302	endoglucanase (EC 3.2.1.4); endo-β-1,3(4)-glucanase / lichenase-laminarinase (EC 3.2.1.6); β-glucosidase (EC 3.2.1.21); lichenase / endo-β-1,3-1,4-glucanase (EC 3.2.1.73); exo-β-1,4-glucanase / cellodextrinase (EC 3.2.1.74); cellobiohydrolase (EC 3.2.1.91); xyloglucan-specific endo-β-1,4-glucanase / endo-xyloglucanase (EC 3.2.1.151); exo-β-glucosaminidase (EC 3.2.1.165)
GH10	23.6	4.26374	3.55556	3.19565	1	0.875	0.55102	0.867925	endo-1,4-β-xylanase (EC 3.2.1.8); endo-1,3-β-xylanase (EC 3.2.1.32); tomatinase (EC 3.2.1.-); xylan endotransglycosylase (EC 2.4.2.-)
GH11	35.2	3.11594	3.44444	1.61111	1	0.663462	0.183673	0.339623	endo-β-1,4-xylanase (EC 3.2.1.8); endo-β-1,3-xylanase (EC 3.2.1.32)
GH12	0	2.80851	0	1.57143	0	0.903846	0	0.132075	endoglucanase (EC 3.2.1.4); xyloglucan hydrolase (EC 3.2.1.151); β-1,3-1,4-glucanase (EC 3.2.1.73); xyloglucan endotransglycosylase (EC 2.4.1.207)
GH16	7.8	19.2981	2.22222	2.12903	1	1	0.55102	0.584906	xyloglucan:xyloglucosyltransferase (EC 2.4.1.207); keratan-sulfate endo-1,4-β-galactosidase (EC 3.2.1.103); endo-1,3-β-glucanase (EC 3.2.1.39); endo-1,3(4)-β-glucanase (EC 3.2.1.6); licheninase (EC 3.2.1.73); β-agarase (EC 3.2.1.81); κ-carrageenase (EC 3.2.1.83); xyloglucanase (EC 3.2.1.151); endo-β-1,3-galactanase (EC 3.2.1.181); β-porphyranase (EC 3.2.1.178); hyaluronidase (EC 3.2.1.35); endo-β…
GH17	0	3.78641	1	0	0	0.990385	0.0204082	0	glucan endo-1,3-β-glucosidase (EC 3.2.1.39); glucan 1,3-β-glucosidase (EC 3.2.1.58); licheninase (EC 3.2.1.73); ABA-specific β-glucosidase (EC 3.2.1.175); β-1,3-glucanosyltransglycosylase (EC 2.4.1.-)
GH26	4.4	2	1.92308	2.29032	1	0.326923	0.530612	0.584906	β-mannanase (EC 3.2.1.78); exo-β-1,4-mannobiohydrolase (EC 3.2.1.100); β-1,3-xylanase (EC 3.2.1.32); lichenase / endo-β-1,3-1,4-glucanase (EC 3.2.1.73); mannobiose-producing exo-β-mannanase (EC 3.2.1.-)
GH27	0	2.95833	1.28571	1.68421	0	0.923077	0.428571	0.358491	α-galactosidase (EC 3.2.1.22); α-N-acetylgalactosaminidase (EC 3.2.1.49); isomalto-dextranase (EC 3.2.1.94); β-L-arabinopyranosidase (EC 3.2.1.88); galactan:galactan galactosyltransferase (EC 2.4.1.-)
GH28	1	8.10891	4.45455	3.51282	0.166667	0.971154	0.44898	0.735849	polygalacturonase (EC 3.2.1.15); α-L-rhamnosidase (EC 3.2.1.40); exo-polygalacturonase (EC 3.2.1.67); exo-polygalacturonosidase (EC 3.2.1.82); rhamnogalacturonase (EC 3.2.1.171); rhamnogalacturonan α-1,2-galacturonohydrolase (EC 3.2.1.173); endo-xylogalacturonan hydrolase (EC 3.2.1.-)
GH29	0	1.77586	2.42105	3.19231	0	0.557692	0.387755	0.490566	α-L-fucosidase (EC 3.2.1.51); α-1,3/1,4-L-fucosidase (EC 3.2.1.111)
GH30	1.6	2.80952	1.80952	2.17647	1	0.807692	0.428571	0.641509	endo-β-1,4-xylanase (EC 3.2.1.8); β-glucosidase (3.2.1.21); β-glucuronidase (EC 3.2.1.31); β-xylosidase (EC 3.2.1.37); β-fucosidase (EC 3.2.1.38); glucosylceramidase (EC 3.2.1.45); β-1,6-glucanase (EC 3.2.1.75); glucuronoarabinoxylan endo-β-1,4-xylanase (EC 3.2.1.136); endo-β-1,6-galactanase (EC:3.2.1.164); [reducing end] β-xylosidase (EC 3.2.1.-)
GH31	8.6	6.65385	2.90476	2.37778	1	1	0.857143	0.849057	α-glucosidase (EC 3.2.1.20); α-galactosidase (EC 3.2.1.22); α-mannosidase (EC 3.2.1.24); α-1,3-glucosidase (EC 3.2.1.84); sucrase-isomaltase (EC 3.2.1.48) (EC 3.2.1.10); α-xylosidase (EC 3.2.1.177); α-glucan lyase (EC 4.2.2.13); isomaltosyltransferase (EC 2.4.1.-); oligosaccharide α-1,4-glucosyltransferase (EC 2.4.1.161); sulfoquinovosidase (EC 3.2.1.-)
GH35	0	3.23469	1.8	2	0	0.942308	0.408163	0.471698	β-galactosidase (EC 3.2.1.23); exo-β-glucosaminidase (EC 3.2.1.165); exo-β-1,4-galactanase (EC 3.2.1.-); β-1,3-galactosidase (EC 3.2.1.-)
GH36	0	1.52778	1.72093	1.59375	0	0.346154	0.877551	0.603774	α-galactosidase (EC 3.2.1.22); α-N-acetylgalactosaminidase (EC 3.2.1.49); stachyose synthase (EC 2.4.1.67); raffinose synthase (EC 2.4.1.82)
GH38	1	1.13592	1.78571	1.72222	0.833333	0.990385	0.285714	0.339623	α-mannosidase (EC 3.2.1.24); mannosyl-oligosaccharide α-1,2-mannosidase (EC 3.2.1.113); mannosyl-oligosaccharide α-1,3-1,6-mannosidase (EC 3.2.1.114); α-2-O-mannosylglycerate hydrolase (EC 3.2.1.170); mannosyl-oligosaccharide α-1,3-mannosidase (EC 3.2.1.-)
GH39	3.4	1.25	1.57143	1.70833	1	0.230769	0.285714	0.641509	α-L-iduronidase (EC 3.2.1.76); β-xylosidase (EC 3.2.1.37)
GH42	0	1	1.54167	1.72414	0	0.0673077	0.489796	0.54717	β-galactosidase (EC 3.2.1.23); α-L-arabinopyranosidase (EC 3.2.1.-)
GH43	26.4	10.5842	9.26829	9.44681	1	0.971154	0.836735	0.886792	β-xylosidase (EC 3.2.1.37); α-L-arabinofuranosidase (EC 3.2.1.55); arabinanase (EC 3.2.1.99); xylanase (EC 3.2.1.8); galactan 1,3-β-galactosidase (EC 3.2.1.145); α-1,2-L-arabinofuranosidase (EC 3.2.1.-); exo-α-1,5-L-arabinofuranosidase (EC 3.2.1.-); [inverting] exo-α-1,5-L-arabinanase (EC 3.2.1.-); β-1,3-xylosidase (EC 3.2.1.-)
GH44	0	1.125	1	1.08333	0	0.153846	0.0612245	0.226415	endoglucanase (EC 3.2.1.4); xyloglucanase (EC 3.2.1.151)
GH45	17	1.63636	4	2	1	0.528846	0.0204082	0.0188679	endoglucanase (EC 3.2.1.4)
GH47	2.2	7.36538	0	0	1	1	0	0	α-mannosidase (EC 3.2.1.113)
GH48	15	0	1	1.375	1	0	0.102041	0.301887	reducing end-acting cellobiohydrolase (EC 3.2.1.176); endo-β-1,4-glucanase (EC 3.2.1.4); chitinase (EC 3.2.1.14)
GH51	0	2.32184	2.22857	2.37209	0	0.836538	0.714286	0.811321	endoglucanase (EC 3.2.1.4); endo-β-1,4-xylanase (EC 3.2.1.8); β-xylosidase (EC 3.2.1.37); α-L-arabinofuranosidase (EC 3.2.1.55)
GH52	0	1	1	1	0	0.00961538	0.0204082	0.150943	β-xylosidase (EC 3.2.1.37)
GH53	1.4	1.35065	1.47826	1.20833	1	0.740385	0.469388	0.45283	endo-β-1,4-galactanase (EC 3.2.1.89)
GH54	0	1.53488	1	1.5	0	0.413462	0.0204082	0.0377358	α-L-arabinofuranosidase (EC 3.2.1.55); β-xylosidase (EC 3.2.1.37)
GH55	0	3.67708	1	1.375	0	0.923077	0.0204082	0.150943	exo-β-1,3-glucanase (EC 3.2.1.58); endo-β-1,3-glucanase (EC 3.2.1.39)
GH62	0	1.71429	2	2	0	0.471154	0.0204082	0.150943	α-L-arabinofuranosidase (EC 3.2.1.55)
GH63	0	1.76768	1.66667	1.58824	0	0.951923	0.0612245	0.320755	processing α-glucosidase (EC 3.2.1.106); α-1,3-glucosidase (EC 3.2.1.84); α-glucosidase (EC 3.2.1.20); mannosylglycerate α-mannosidase / mannosylglycerate hydrolase (EC 3.2.1.170)
GH64	1.25	2.34	1	1.16667	0.666667	0.480769	0.0408163	0.113208	β-1,3-glucanase (EC 3.2.1.39)
GH67	1	1.27027	1.05882	1.02941	0.333333	0.355769	0.346939	0.641509	α-glucuronidase (EC 3.2.1.139); xylan α-1,2-glucuronidase (EC 3.2.1.131)
GH74	2.4	1.42857	1.25	1.26316	1	0.538462	0.0816327	0.358491	endoglucanase (EC 3.2.1.4); oligoxyloglucan reducing end-specific cellobiohydrolase (EC 3.2.1.150); xyloglucanase (EC 3.2.1.151)
GH76	0	7.0814	2.84615	1.57895	0	0.826923	0.265306	0.358491	α-1,6-mannanase (EC 3.2.1.101)
GH78	1.2	4.55844	4.16667	2.55556	0.833333	0.740385	0.367347	0.509434	α-L-rhamnosidase (EC 3.2.1.40); rhamnogalacturonan α-L-rhamnohydrolase (EC 3.2.1.174)
GH79	0	4.76596	1	1.2	0	0.903846	0.0408163	0.0943396	β-glucuronidase (EC 3.2.1.31); hyaluronoglucuronidase (EC 3.2.1.36); heparanase (EC 3.2.1.166); baicalin β-glucuronidase (EC 3.2.1.167); β-4-O-methyl-glucuronidase (EC 3.2.1.-)
GH88	0	1.46875	2.5	2.55556	0	0.615385	0.285714	0.339623	d-4,5-unsaturated β-glucuronyl hydrolase (EC 3.2.1.-)
GH92	0	4.13684	7.9	5.64706	0	0.913462	0.204082	0.320755	mannosyl-oligosaccharide α-1,2-mannosidase (EC 3.2.1.113); mannosyl-oligosaccharide α-1,3-mannosidase (EC 3.2.1.-); mannosyl-oligosaccharide α-1,6-mannosidase (EC 3.2.1.-); α-mannosidase (EC 3.2.1.24); α-1,2-mannosidase (EC 3.2.1.-); α-1,3-mannosidase (EC 3.2.1.-); α-1,4-mannosidase (EC 3.2.1.-); mannosyl-1-phosphodiester α-1,P-mannosidase (EC 3.2.1.-)
GH93	0	2.28571	1.33333	1.25	0	0.538462	0.0612245	0.08	exo-α-L-1,5-arabinanase (EC 3.2.1.-)
GH94	0	1	1.6129	2.20588	0	0.182692	0.632653	0.641509	cellobiose phosphorylase (EC 2.4.1.20); laminaribiose phosphorylase (EC 2.4.1.31); cellodextrin phosphorylase (EC 2.4.1.49); chitobiose phosphorylase (EC 2.4.1.-); cyclic β-1,2-glucan synthase (EC 2.4.1.-); cellobionic acid phosphorylase (EC 2.4.1.321); β-1,2-oligoglucan phosphorylase (EC 2.4.1.-)
GH95	1	1.65	2.23077	2.35714	0.833333	0.769231	0.530612	0.528302	α-L-fucosidase (EC 3.2.1.51); α-1,2-L-fucosidase (EC 3.2.1.63); α-L-galactosidase (EC 3.2.1.-)
GH105	1.66667	3.53608	3.04167	2.88235	0.666667	0.932692	0.489796	0.641509	unsaturated rhamnogalacturonyl hydrolase (EC 3.2.1.172); d-4,5-unsaturated β-glucuronyl hydrolase (EC 3.2.1.-)
GH106	0	1.46667	2	2.05263	0	0.288462	0.265306	0.358491	α-L-rhamnosidase (EC 3.2.1.40)
GH113	0	1	1.5	1.44444	0	0.00961538	0.122449	0.169811	β-mannanase (EC 3.2.1.78)
GH114	15	1.98077	1.5	1.2	1	0.5	0.204082	0.0943396	endo-α-1,4-polygalactosaminidase (EC 3.2.1.109)
GH115	2.6	1.65	1.92	2	1	0.769231	0.510204	0.320755	xylan α-1,2-glucuronidase (3.2.1.131); α-(4-O-methyl)-glucuronidase (3.2.1.-)
GH120	1	0	1.36364	1	0.333333	0	0.22449	0.132075	β-xylosidase (EC 3.2.1.37)
GH124	2.5	0	4	5	0.833333	0	0.0408163	0.0754717	endoglucanase (EC 3.2.1.4)
GH125	0	1.90722	1.625	1.13333	0	0.932692	0.163265	0.283019	exo-α-1,6-mannosidase (EC 3.2.1.-)
GH128	0	4.06061	1	1.4	0	0.951923	0.0204082	0.0943396	β-1,3-glucanase (EC 3.2.1.39)
GH130	0	1.33333	1.81481	2.55882	0	0.0288462	0.55102	0.641509	β-1,4-mannosylglucose phosphorylase (EC 2.4.1.281); β-1,4-mannooligosaccharide phosphorylase (EC 2.4.1.319); β-1,4-mannosyl-N-acetyl-glucosamine phosphorylase (EC 2.4.1.320); β-1,2-mannobiose phosphorylase (EC 2.4.1.-); β-1,2-oligomannan phosphorylase (EC 2.4.1.-); β-1,2-mannosidase (EC 3.2.1.-)
GH139	0	1	1	1	0	0.0865385	0.142857	0.0943396	α-2-O-methyl-L-fucosidase (EC 3.2.1.-)
GH141	1	1.1	1.66667	1.375	0.833333	0.0961538	0.183673	0.301887	α-L-fucosidase (EC 3.2.1.51); xylanase (EC 3.2.1.8)
GH142	0	1.03333	1	1	0	0.288462	0.163265	0.132075	β-L-arabinofuranosidase (EC 3.2.1.185)
GH145	0	1.12	1	1.2	0	0.480769	0.102041	0.188679	L-Rhα-α-1,4-GlcA-specific α-L-rhamnosidase (EC 3.2.1.-)
PL1	10.8	5.61972	4.92857	2.65385	1	0.682692	0.285714	0.490566	pectate lyase (EC 4.2.2.2); exo-pectate lyase (EC 4.2.2.9); pectin lyase (EC 4.2.2.10)
PL3	5.6	3.82143	1	1.72727	1	0.538462	0.0204082	0.207547	pectate lyase (EC 4.2.2.2)
PL4	4	2.70312	0	1.2	1	0.615385	0	0.0943396	rhamnogalacturonan endolyase (EC 4.2.2.23)
PL9	1	1.42857	1.52381	2	0.166667	0.201923	0.428571	0.566038	pectate lyase (EC 4.2.2.2); exopolygalacturonate lyase (EC 4.2.2.9); thiopeptidoglycan lyase (EC 4.2.2.-)
PL10	0	1	1.28571	1.5	0	0.0192308	0.142857	0.301887	pectate lyase (EC 4.2.2.2)
PL11	1	1	2.28571	1.84	0.166667	0.0288462	0.285714	0.471698	rhamnogalacturonan endolyase (EC 4.2.2.23); rhamnogalacturonan exolyase (EC 4.2.2.24)
PL22	0	1.44444	2	1.95833	0	0.173077	0.204082	0.45283	oligogalacturonate lyase / oligogalacturonide lyase (EC 4.2.2.6)
*mean was calculated excluding counts of zero.
